# Supplementary material
Source: publisher site journal article supplement (https://www.spandidos-publications.com/683/downloadSupplementary)
Supplement: Supplementary file 1 [file downloadSupplementary]

## Sheet: TopBlastHits
GO function annotation and analysis different expressed proteins of ACBP-OXA vs. control TopBlastHits
Sequence name	Sequence desc.	Sequence length	Hit desc.	Hit ACC	E-Value	Similarity	Bit-Score	Alignment length	Positives
G3V1D1	FRIH_HUMANFerritin heavy chain OS=Homo sapiens GN=FTH1 PE=1 SV=2	113	sp|P02794|FRIH_HUMANFerritin heavy chain OS=Homo sapiens GN=FTH1 PE=1 SV=2	P02794	3.50331e-81	100	239.58	113	113
Q9H3K6	BOLA2_HUMAN 2 OS=Homo sapiens GN=BOLA2 PE=1 SV=1	86	sp|Q9H3K6|BOLA2_HUMANBolA-like protein 2 OS=Homo sapiens GN=BOLA2 PE=1 SV=1	Q9H3K6	2.30137e-58	100	176.792	86	86
D3YTB1	RL32_HUMAN60S ribosomal L32 OS=Homo sapiens GN=RPL32 PE=1 SV=2	133	sp|P62910|RL32_HUMAN60S ribosomal protein L32 OS=Homo sapiens GN=RPL32 PE=1 SV=2	P62910	4.62046e-94	100	271.166	133	133
S4R456	RS15_HUMAN40S ribosomal S15 OS=Homo sapiens GN=RPS15 PE=1 SV=2	68	sp|P62841|RS15_HUMAN40S ribosomal protein S15 OS=Homo sapiens GN=RPS15 PE=1 SV=2	P62841	1.34368e-42	100	137.887	68	68
C9K025	RL35A_HUMAN60S ribosomal L35a OS=Homo sapiens GN=RPL35A PE=1 SV=2	94	sp|P18077|RL35A_HUMAN60S ribosomal protein L35a OS=Homo sapiens GN=RPL35A PE=1 SV=2	P18077	2.78956e-65	100	195.667	94	94
B7Z2S5	TRXR1_HUMANThioredoxin reductase cytoplasmic OS=Homo sapiens GN=TXNRD1 PE=1 SV=3	547	sp|Q16881|TRXR1_HUMANThioredoxin reductase 1, cytoplasmic OS=Homo sapiens GN=TXNRD1 PE=1 SV=3	Q16881	0	100	1127.46	546	546
P31350	RIR2_HUMANRibonucleoside-diphosphate reductase subunit M2 OS=Homo sapiens GN=RRM2 PE=1 SV=1	389	sp|P31350|RIR2_HUMANRibonucleoside-diphosphate reductase subunit M2 OS=Homo sapiens GN=RRM2 PE=1 SV=1	P31350	0	100	805.053	389	389
P63173	RL38_HUMAN60S ribosomal L38 OS=Homo sapiens GN=RPL38 PE=1 SV=2	70	sp|P63173|RL38_HUMAN60S ribosomal protein L38 OS=Homo sapiens GN=RPL38 PE=1 SV=2	P63173	2.22625e-43	100	137.502	70	70
O60701	UGDH_HUMANUDP-glucose 6-dehydrogenase OS=Homo sapiens GN=UGDH PE=1 SV=1	494	sp|O60701|UGDH_HUMANUDP-glucose 6-dehydrogenase OS=Homo sapiens GN=UGDH PE=1 SV=1	O60701	0	100	1025.77	494	494
Q5T123	SH3L3_HUMANSH3 domain-binding glutamic acid-rich 3 OS=Homo sapiens GN=SH3BGRL3 PE=1 SV=1	88	sp|Q9H299|SH3L3_HUMANSH3 domain-binding glutamic acid-rich-like protein 3 OS=Homo sapiens GN=SH3BGRL3 PE=1 SV=1	Q9H299	6.72672e-48	98	150.599	74	73
B3KS36	RL3_HUMAN60S ribosomal L3 OS=Homo sapiens GN=RPL3 PE=1 SV=2	354	sp|P39023|RL3_HUMAN60S ribosomal protein L3 OS=Homo sapiens GN=RPL3 PE=1 SV=2	P39023	0	87	697.967	403	352
A0A087WXM6	RL17_HUMAN60S ribosomal L17 OS=Homo sapiens GN=RPL17 PE=1 SV=3	169	sp|P18621|RL17_HUMAN60S ribosomal protein L17 OS=Homo sapiens GN=RPL17 PE=1 SV=3	P18621	8.60845e-127	100	357.836	169	169
P39023	RL3_HUMAN60S ribosomal L3 OS=Homo sapiens GN=RPL3 PE=1 SV=2	403	sp|P39023|RL3_HUMAN60S ribosomal protein L3 OS=Homo sapiens GN=RPL3 PE=1 SV=2	P39023	0	100	830.861	403	403
K7ER90	EIF3G_HUMANEukaryotic translation initiation factor 3 subunit G OS=Homo sapiens GN=EIF3G PE=1 SV=2	227	sp|O75821|EIF3G_HUMANEukaryotic translation initiation factor 3 subunit G OS=Homo sapiens GN=EIF3G PE=1 SV=2	O75821	4.61887e-148	86	419.468	262	227
P48506	GSH1_HUMANGlutamate--cysteine ligase catalytic subunit OS=Homo sapiens GN=GCLC PE=1 SV=2	637	sp|P48506|GSH1_HUMANGlutamate--cysteine ligase catalytic subunit OS=Homo sapiens GN=GCLC PE=1 SV=2	P48506	0	100	1335.47	637	637
A0A024RDF4	HNRPD_HUMANHeterogeneous nuclear ribonucleo D0 OS=Homo sapiens GN=HNRNPD PE=1 SV=1	306	sp|Q14103|HNRPD_HUMANHeterogeneous nuclear ribonucleoprotein D0 OS=Homo sapiens GN=HNRNPD PE=1 SV=1	Q14103	0	86	597.045	355	306
Q71UM5	RS27L_HUMAN40S ribosomal S27-like OS=Homo sapiens GN=RPS27L PE=1 SV=3	84	sp|Q71UM5|RS27L_HUMAN40S ribosomal protein S27-like OS=Homo sapiens GN=RPS27L PE=1 SV=3	Q71UM5	8.62507e-58	100	175.252	84	84
B4DUP5	EI2BD_HUMANTranslation initiation factor eIF-2B subunit delta OS=Homo sapiens GN=EIF2B4 PE=1 SV=2	312	sp|Q9UI10|EI2BD_HUMANTranslation initiation factor eIF-2B subunit delta OS=Homo sapiens GN=EIF2B4 PE=1 SV=2	Q9UI10	0	98	560.066	283	280
Q5HYD9	CYB5B_HUMANCytochrome b5 type B OS=Homo sapiens GN=CYB5B PE=1 SV=2	107	sp|O43169|CYB5B_HUMANCytochrome b5 type B OS=Homo sapiens GN=CYB5B PE=1 SV=2	O43169	6.99719e-74	100	219.164	107	107
P16402	H13_HUMANHistone OS=Homo sapiens GN=HIST1H1D PE=1 SV=2	221	sp|P16402|H13_HUMANHistone H1.3 OS=Homo sapiens GN=HIST1H1D PE=1 SV=2	P16402	1.19694e-133	100	379.022	221	221
M0R0F0	RS5_HUMAN40S ribosomal S5 OS=Homo sapiens GN=RPS5 PE=1 SV=4	200	sp|P46782|RS5_HUMAN40S ribosomal protein S5 OS=Homo sapiens GN=RPS5 PE=1 SV=4	P46782	3.71678e-149	100	416.387	200	200
Q9Y3U8	RL36_HUMAN60S ribosomal L36 OS=Homo sapiens GN=RPL36 PE=1 SV=3	105	sp|Q9Y3U8|RL36_HUMAN60S ribosomal protein L36 OS=Homo sapiens GN=RPL36 PE=1 SV=3	Q9Y3U8	9.9647e-71	100	209.534	105	105
P11388	TOP2A_HUMANDNA topoisomerase 2-alpha OS=Homo sapiens GN=TOP2A PE=1 SV=3	1531	sp|P11388|TOP2A_HUMANDNA topoisomerase 2-alpha OS=Homo sapiens GN=TOP2A PE=1 SV=3	P11388	0	100	3165.17	1531	1531
Q16678	CP1B1_HUMANCytochrome P450 1B1 OS=Homo sapiens GN=CYP1B1 PE=1 SV=2	543	sp|Q16678|CP1B1_HUMANCytochrome P450 1B1 OS=Homo sapiens GN=CYP1B1 PE=1 SV=2	Q16678	0	100	1121.69	543	543
P50914	RL14_HUMAN60S ribosomal L14 OS=Homo sapiens GN=RPL14 PE=1 SV=4	215	sp|P50914|RL14_HUMAN60S ribosomal protein L14 OS=Homo sapiens GN=RPL14 PE=1 SV=4	P50914	1.91659e-150	100	421.009	215	215
Q9BW34	EF1D_HUMANElongation factor 1-delta OS=Homo sapiens GN=EEF1D PE=1 SV=5	550	sp|P29692|EF1D_HUMANElongation factor 1-delta OS=Homo sapiens GN=EEF1D PE=1 SV=5	P29692	8.65928e-180	91	511.916	281	257
I3L2L5	F195B_HUMANMapk-regulated corepressor-interacting 1 OS=Homo sapiens GN=FAM195B PE=1 SV=1	92	sp|C9JLW8|F195B_HUMANMapk-regulated corepressor-interacting protein 1 OS=Homo sapiens GN=FAM195B PE=1 SV=1	C9JLW8	1.0269e-61	100	186.037	92	92
Q9Y3C1	NOP16_HUMANNucleolar 16 OS=Homo sapiens GN=NOP16 PE=1 SV=2	178	sp|Q9Y3C1|NOP16_HUMANNucleolar protein 16 OS=Homo sapiens GN=NOP16 PE=1 SV=2	Q9Y3C1	5.44146e-130	100	365.925	178	178
Q13895	BYST_HUMANBystin OS=Homo sapiens GN=BYSL PE=1 SV=3	437	sp|Q13895|BYST_HUMANBystin OS=Homo sapiens GN=BYSL PE=1 SV=3	Q13895	0	100	895.19	437	437
B2R4U3	UBE2C_HUMANUbiquitin-conjugating enzyme E2 C OS=Homo sapiens GN=UBE2C PE=1 SV=1	179	sp|O00762|UBE2C_HUMANUbiquitin-conjugating enzyme E2 C OS=Homo sapiens GN=UBE2C PE=1 SV=1	O00762	1.46553e-132	99	372.474	179	178
P62081	RS7_HUMAN40S ribosomal S7 OS=Homo sapiens GN=RPS7 PE=1 SV=1	194	sp|P62081|RS7_HUMAN40S ribosomal protein S7 OS=Homo sapiens GN=RPS7 PE=1 SV=1	P62081	5.19684e-138	100	387.497	194	194
Q8TDN6	BRX1_HUMANRibosome biogenesis BRX1 homolog OS=Homo sapiens GN=BRIX1 PE=1 SV=2	353	sp|Q8TDN6|BRX1_HUMANRibosome biogenesis protein BRX1 homolog OS=Homo sapiens GN=BRIX1 PE=1 SV=2	Q8TDN6	0	100	733.406	353	353
Q6IAM0	EIF3G_HUMANEukaryotic translation initiation factor 3 subunit G OS=Homo sapiens GN=EIF3G PE=1 SV=2	320	sp|O75821|EIF3G_HUMANEukaryotic translation initiation factor 3 subunit G OS=Homo sapiens GN=EIF3G PE=1 SV=2	O75821	0	99	658.677	320	319
Q9BVP2	GNL3_HUMANGuanine nucleotide-binding -like 3 OS=Homo sapiens GN=GNL3 PE=1 SV=2	549	sp|Q9BVP2|GNL3_HUMANGuanine nucleotide-binding protein-like 3 OS=Homo sapiens GN=GNL3 PE=1 SV=2	Q9BVP2	0	100	1126.69	549	549
P46013	KI67_HUMANAntigen KI-67 OS=Homo sapiens GN=MKI67 PE=1 SV=2	3256	sp|P46013|KI67_HUMANAntigen KI-67 OS=Homo sapiens GN=MKI67 PE=1 SV=2	P46013	0	100	6594.99	3256	3256
Q6DKI1	RL7L_HUMAN60S ribosomal L7-like 1 OS=Homo sapiens GN=RPL7L1 PE=1 SV=1	246	sp|Q6DKI1|RL7L_HUMAN60S ribosomal protein L7-like 1 OS=Homo sapiens GN=RPL7L1 PE=1 SV=1	Q6DKI1	5.61844e-180	100	498.434	246	246
Q8N4P8	NOG1_HUMANNucleolar GTP-binding 1 OS=Homo sapiens GN=GTPBP4 PE=1 SV=3	632	sp|Q9BZE4|NOG1_HUMANNucleolar GTP-binding protein 1 OS=Homo sapiens GN=GTPBP4 PE=1 SV=3	Q9BZE4	0	100	1295.8	628	628
Q9BVJ6	UT14A_HUMANU3 small nucleolar RNA-associated 14 homolog A OS=Homo sapiens GN=UTP14A PE=1 SV=1	771	sp|Q9BVJ6|UT14A_HUMANU3 small nucleolar RNA-associated protein 14 homolog A OS=Homo sapiens GN=UTP14A PE=1 SV=1	Q9BVJ6	0	100	1550.03	771	771
P60604	UB2G2_HUMANUbiquitin-conjugating enzyme E2 G2 OS=Homo sapiens GN=UBE2G2 PE=1 SV=1	165	sp|P60604|UB2G2_HUMANUbiquitin-conjugating enzyme E2 G2 OS=Homo sapiens GN=UBE2G2 PE=1 SV=1	P60604	1.02584e-121	100	343.969	165	165
A8K7A2	BOREA_HUMANBorealin OS=Homo sapiens GN=CDCA8 PE=1 SV=2	280	sp|Q53HL2|BOREA_HUMANBorealin OS=Homo sapiens GN=CDCA8 PE=1 SV=2	Q53HL2	0	99	566.229	280	279
A8K800	RPF2_HUMANRibosome production factor 2 homolog OS=Homo sapiens GN=RPF2 PE=1 SV=2	306	sp|Q9H7B2|RPF2_HUMANRibosome production factor 2 homolog OS=Homo sapiens GN=RPF2 PE=1 SV=2	Q9H7B2	0	99	619.002	306	305
P63218	GBG5_HUMANGuanine nucleotide-binding G(I) G(S) G(O) subunit gamma-5 OS=Homo sapiens GN=GNG5 PE=1 SV=3	68	sp|P63218|GBG5_HUMANGuanine nucleotide-binding protein G(I)/G(S)/G(O) subunit gamma-5 OS=Homo sapiens GN=GNG5 PE=1 SV=3	P63218	8.52538e-44	100	138.272	68	68
Q15397	PUM3_HUMANPumilio homolog 3 OS=Homo sapiens GN=PUM3 PE=1 SV=3	648	sp|Q15397|PUM3_HUMANPumilio homolog 3 OS=Homo sapiens GN=PUM3 PE=1 SV=3	Q15397	0	100	1335.47	648	648
Q9NSI2	F207A_HUMAN FAM207A OS=Homo sapiens GN=FAM207A PE=1 SV=2	230	sp|Q9NSI2|F207A_HUMANProtein FAM207A OS=Homo sapiens GN=FAM207A PE=1 SV=2	Q9NSI2	5.93522e-162	100	451.44	230	230
B2R823	PNO1_HUMANRNA-binding PNO1 OS=Homo sapiens GN=PNO1 PE=1 SV=1	252	sp|Q9NRX1|PNO1_HUMANRNA-binding protein PNO1 OS=Homo sapiens GN=PNO1 PE=1 SV=1	Q9NRX1	0	99	511.531	252	251
Q8IZZ8	ANT3_HUMANAntithrombin-III OS=Homo sapiens GN=SERPINC1 PE=1 SV=1	122	sp|P01008|ANT3_HUMANAntithrombin-III OS=Homo sapiens GN=SERPINC1 PE=1 SV=1	P01008	1.80943e-85	99	259.996	122	121
Q9NY93	DDX56_HUMANProbable ATP-dependent RNA helicase DDX56 OS=Homo sapiens GN=DDX56 PE=1 SV=1	547	sp|Q9NY93|DDX56_HUMANProbable ATP-dependent RNA helicase DDX56 OS=Homo sapiens GN=DDX56 PE=1 SV=1	Q9NY93	0	100	1112.44	547	547
Q99988	GDF15_HUMANGrowth differentiation factor 15 OS=Homo sapiens GN=GDF15 PE=2 SV=3	308	sp|Q99988|GDF15_HUMANGrowth/differentiation factor 15 OS=Homo sapiens GN=GDF15 PE=2 SV=3	Q99988	0	100	615.92	308	308
P09669	COX6C_HUMANCytochrome c oxidase subunit 6C OS=Homo sapiens GN=COX6C PE=1 SV=2	75	sp|P09669|COX6C_HUMANCytochrome c oxidase subunit 6C OS=Homo sapiens GN=COX6C PE=1 SV=2	P09669	7.35932e-49	100	151.754	75	75
Q92876	KLK6_HUMANKallikrein-6 OS=Homo sapiens GN=KLK6 PE=1 SV=1	244	sp|Q92876|KLK6_HUMANKallikrein-6 OS=Homo sapiens GN=KLK6 PE=1 SV=1	Q92876	0	100	508.449	244	244
A8YQF4	1C15_HUMANHLA class I histocompatibility Cw-15 alpha chain OS=Homo sapiens GN=HLA-C PE=1 SV=1	343	sp|Q07000|1C15_HUMANHLA class I histocompatibility antigen, Cw-15 alpha chain OS=Homo sapiens GN=HLA-C PE=1 SV=1	Q07000	0	100	706.442	340	340
B3KRC6	CP51A_HUMANLanosterol 14-alpha demethylase OS=Homo sapiens GN=CYP51A1 PE=1 SV=3	449	sp|Q16850|CP51A_HUMANLanosterol 14-alpha demethylase OS=Homo sapiens GN=CYP51A1 PE=1 SV=3	Q16850	0	100	934.865	446	446
Q86U90	YRDC_HUMAN domain-containing mitochondrial OS=Homo sapiens GN=YRDC PE=1 SV=1	279	sp|Q86U90|YRDC_HUMANYrdC domain-containing protein, mitochondrial OS=Homo sapiens GN=YRDC PE=1 SV=1	Q86U90	0	100	554.288	279	279
O15173	PGRC2_HUMANMembrane-associated progesterone receptor component 2 OS=Homo sapiens GN=PGRMC2 PE=1 SV=1	223	sp|O15173|PGRC2_HUMANMembrane-associated progesterone receptor component 2 OS=Homo sapiens GN=PGRMC2 PE=1 SV=1	O15173	5.0579e-160	100	446.047	223	223
H3BMQ2	RLP24_HUMANProbable ribosome biogenesis RLP24 OS=Homo sapiens GN=RSL24D1 PE=1 SV=1	66	sp|Q9UHA3|RLP24_HUMANProbable ribosome biogenesis protein RLP24 OS=Homo sapiens GN=RSL24D1 PE=1 SV=1	Q9UHA3	4.55318e-34	100	116.316	56	56
B2RA70	YES_HUMANTyrosine- kinase Yes OS=Homo sapiens GN=YES1 PE=1 SV=3	543	sp|P07947|YES_HUMANTyrosine-protein kinase Yes OS=Homo sapiens GN=YES1 PE=1 SV=3	P07947	0	99	1132.86	543	542
A8MW49	FABPL_HUMANFatty acid-binding liver OS=Homo sapiens GN=FABP1 PE=1 SV=1	124	sp|P07148|FABPL_HUMANFatty acid-binding protein, liver OS=Homo sapiens GN=FABP1 PE=1 SV=1	P07148	6.22188e-75	100	221.861	111	111
Q5JXX1	MO4L2_HUMANMortality factor 4 2 OS=Homo sapiens GN=MORF4L2 PE=1 SV=1	158	sp|Q15014|MO4L2_HUMANMortality factor 4-like protein 2 OS=Homo sapiens GN=MORF4L2 PE=1 SV=1	Q15014	1.92204e-111	100	322.013	158	158
P62861	RS30_HUMAN40S ribosomal S30 OS=Homo sapiens GN=FAU PE=1 SV=1	59	sp|P62861|RS30_HUMAN40S ribosomal protein S30 OS=Homo sapiens GN=FAU PE=1 SV=1	P62861	4.65962e-35	100	115.546	59	59
O75487	GPC4_HUMANGlypican-4 OS=Homo sapiens GN=GPC4 PE=1 SV=4	556	sp|O75487|GPC4_HUMANGlypican-4 OS=Homo sapiens GN=GPC4 PE=1 SV=4	O75487	0	100	1165.98	556	556
Q8TDD1	DDX54_HUMANATP-dependent RNA helicase DDX54 OS=Homo sapiens GN=DDX54 PE=1 SV=2	881	sp|Q8TDD1|DDX54_HUMANATP-dependent RNA helicase DDX54 OS=Homo sapiens GN=DDX54 PE=1 SV=2	Q8TDD1	0	100	1785.77	881	881
Q9ULW0	TPX2_HUMANTargeting for Xklp2 OS=Homo sapiens GN=TPX2 PE=1 SV=2	747	sp|Q9ULW0|TPX2_HUMANTargeting protein for Xklp2 OS=Homo sapiens GN=TPX2 PE=1 SV=2	Q9ULW0	0	100	1515.36	747	747
A8K4B4	NUSAP_HUMANNucleolar and spindle-associated 1 OS=Homo sapiens GN=NUSAP1 PE=1 SV=1	441	sp|Q9BXS6|NUSAP_HUMANNucleolar and spindle-associated protein 1 OS=Homo sapiens GN=NUSAP1 PE=1 SV=1	Q9BXS6	0	99	901.738	441	440
Q5T7U1	TF3C5_HUMANGeneral transcription factor 3C polypeptide 5 OS=Homo sapiens GN=GTF3C5 PE=1 SV=2	457	sp|Q9Y5Q8|TF3C5_HUMANGeneral transcription factor 3C polypeptide 5 OS=Homo sapiens GN=GTF3C5 PE=1 SV=2	Q9Y5Q8	0	79	777.704	526	419
Q9Y6H1	CHCH2_HUMANCoiled-coil-helix-coiled-coil-helix domain-containing 2 OS=Homo sapiens GN=CHCHD2 PE=1 SV=1	151	sp|Q9Y6H1|CHCH2_HUMANCoiled-coil-helix-coiled-coil-helix domain-containing protein 2 OS=Homo sapiens GN=CHCHD2 PE=1 SV=1	Q9Y6H1	8.33636e-105	100	300.056	151	151
Q13823	NOG2_HUMANNucleolar GTP-binding 2 OS=Homo sapiens GN=GNL2 PE=1 SV=1	731	sp|Q13823|NOG2_HUMANNucleolar GTP-binding protein 2 OS=Homo sapiens GN=GNL2 PE=1 SV=1	Q13823	0	100	1509.2	731	731
P0CJ79	ZN888_HUMANZinc finger 888 OS=Homo sapiens GN=ZNF888 PE=3 SV=1	500	sp|P0CJ79|ZN888_HUMANZinc finger protein 888 OS=Homo sapiens GN=ZNF888 PE=3 SV=1	P0CJ79	0	100	1033.09	500	500
A0A024R172	PTGR1_HUMANProstaglandin reductase 1 OS=Homo sapiens GN=PTGR1 PE=1 SV=2	329	sp|Q14914|PTGR1_HUMANProstaglandin reductase 1 OS=Homo sapiens GN=PTGR1 PE=1 SV=2	Q14914	0	100	669.463	329	329
B4DTK6	RRN3_HUMANRNA polymerase I-specific transcription initiation factor RRN3 OS=Homo sapiens GN=RRN3 PE=1 SV=1	621	sp|Q9NYV6|RRN3_HUMANRNA polymerase I-specific transcription initiation factor RRN3 OS=Homo sapiens GN=RRN3 PE=1 SV=1	Q9NYV6	0	95	1271.53	651	620
B4DE67	LICH_HUMANLysosomal acid lipase cholesteryl ester hydrolase OS=Homo sapiens GN=LIPA PE=1 SV=2	204	sp|P38571|LICH_HUMANLysosomal acid lipase/cholesteryl ester hydrolase OS=Homo sapiens GN=LIPA PE=1 SV=2	P38571	1.79401e-152	100	432.565	204	204
Q8NEF9	SRFB1_HUMANSerum response factor-binding 1 OS=Homo sapiens GN=SRFBP1 PE=1 SV=1	429	sp|Q8NEF9|SRFB1_HUMANSerum response factor-binding protein 1 OS=Homo sapiens GN=SRFBP1 PE=1 SV=1	Q8NEF9	0	100	871.307	429	429
I3L1D4	RFOX1_HUMANRNA binding fox-1 homolog 1 OS=Homo sapiens GN=RBFOX1 PE=1 SV=2	189	sp|Q9NWB1|RFOX1_HUMANRNA binding protein fox-1 homolog 1 OS=Homo sapiens GN=RBFOX1 PE=1 SV=2	Q9NWB1	1.71118e-127	100	368.237	179	179
F6TR53	H1BP3_HUMANHCLS1-binding 3 OS=Homo sapiens GN=HS1BP3 PE=1 SV=1	213	sp|Q53T59|H1BP3_HUMANHCLS1-binding protein 3 OS=Homo sapiens GN=HS1BP3 PE=1 SV=1	Q53T59	4.1092e-148	100	421.779	208	208
Q9H9Y2	RPF1_HUMANRibosome production factor 1 OS=Homo sapiens GN=RPF1 PE=1 SV=2	349	sp|Q9H9Y2|RPF1_HUMANRibosome production factor 1 OS=Homo sapiens GN=RPF1 PE=1 SV=2	Q9H9Y2	0	100	724.931	349	349
O95478	NSA2_HUMANRibosome biogenesis NSA2 homolog OS=Homo sapiens GN=NSA2 PE=1 SV=1	260	sp|O95478|NSA2_HUMANRibosome biogenesis protein NSA2 homolog OS=Homo sapiens GN=NSA2 PE=1 SV=1	O95478	0	100	531.176	260	260
B3KM35	B4GT4_HUMANBeta-1,4-galactosyltransferase 4 OS=Homo sapiens GN=B4GALT4 PE=1 SV=1	344	sp|O60513|B4GT4_HUMANBeta-1,4-galactosyltransferase 4 OS=Homo sapiens GN=B4GALT4 PE=1 SV=1	O60513	0	99	716.072	344	343
P07477	TRY1_HUMANTrypsin-1 OS=Homo sapiens GN=PRSS1 PE=1 SV=1	247	sp|P07477|TRY1_HUMANTrypsin-1 OS=Homo sapiens GN=PRSS1 PE=1 SV=1	P07477	0	100	512.686	247	247
A0A0S2Z5K6	SIL1_HUMANNucleotide exchange factor SIL1 OS=Homo sapiens GN=SIL1 PE=1 SV=1	397	sp|Q9H173|SIL1_HUMANNucleotide exchange factor SIL1 OS=Homo sapiens GN=SIL1 PE=1 SV=1	Q9H173	0	83	713.375	461	386
H0YNP9	MESH1_HUMANGuanosine-3 ,5 -bis(diphosphate) 3 -pyrophosphohydrolase MESH1 OS=Homo sapiens GN=HDDC3 PE=1 SV=3	143	sp|Q8N4P3|MESH1_HUMANGuanosine-3',5'-bis(diphosphate) 3'-pyrophosphohydrolase MESH1 OS=Homo sapiens GN=HDDC3 PE=1 SV=3	Q8N4P3	8.77108e-97	100	280.411	137	137
Q53EY9	FBX22_HUMANF-box only 22 OS=Homo sapiens GN=FBXO22 PE=1 SV=1	403	sp|Q8NEZ5|FBX22_HUMANF-box only protein 22 OS=Homo sapiens GN=FBXO22 PE=1 SV=1	Q8NEZ5	0	99	828.55	403	402
E5RJK7	LYRM2_HUMANLYR motif-containing 2 OS=Homo sapiens GN=LYRM2 PE=1 SV=1	72	sp|Q9NU23|LYRM2_HUMANLYR motif-containing protein 2 OS=Homo sapiens GN=LYRM2 PE=1 SV=1	Q9NU23	4.67353e-40	90	129.413	72	65
B3KNS8	SURF6_HUMANSurfeit locus 6 OS=Homo sapiens GN=SURF6 PE=1 SV=3	361	sp|O75683|SURF6_HUMANSurfeit locus protein 6 OS=Homo sapiens GN=SURF6 PE=1 SV=3	O75683	0	99	695.271	361	360
A0A0A0MRW6	NOL6_HUMANNucleolar 6 OS=Homo sapiens GN=NOL6 PE=1 SV=2	1008	sp|Q9H6R4|NOL6_HUMANNucleolar protein 6 OS=Homo sapiens GN=NOL6 PE=1 SV=2	Q9H6R4	0	100	2025.75	998	998
F6KPG5	ALBU_HUMANSerum albumin OS=Homo sapiens GN=ALB PE=1 SV=2	585	sp|P02768|ALBU_HUMANSerum albumin OS=Homo sapiens GN=ALB PE=1 SV=2	P02768	0	99	1184.86	585	584
Q15125	EBP_HUMAN3-beta-hydroxysteroid-Delta(8),Delta(7)-isomerase OS=Homo sapiens GN=EBP PE=1 SV=3	230	sp|Q15125|EBP_HUMAN3-beta-hydroxysteroid-Delta(8),Delta(7)-isomerase OS=Homo sapiens GN=EBP PE=1 SV=3	Q15125	7.7897e-170	100	471.47	230	230
A0A1B0GVI7	AHR_HUMANAryl hydrocarbon receptor OS=Homo sapiens GN=AHR PE=1 SV=2	797	sp|P35869|AHR_HUMANAryl hydrocarbon receptor OS=Homo sapiens GN=AHR PE=1 SV=2	P35869	0	99	1658.27	796	793
Q6FHK1	RM28_HUMAN39S ribosomal mitochondrial OS=Homo sapiens GN=MRPL28 PE=1 SV=4	128	sp|Q13084|RM28_HUMAN39S ribosomal protein L28, mitochondrial OS=Homo sapiens GN=MRPL28 PE=1 SV=4	Q13084	6.84714e-85	99	252.292	128	127
B4DE48	SNX17_HUMANSorting nexin-17 OS=Homo sapiens GN=SNX17 PE=1 SV=1	440	sp|Q15036|SNX17_HUMANSorting nexin-17 OS=Homo sapiens GN=SNX17 PE=1 SV=1	Q15036	0	100	895.96	440	440
Q9BWT3	PAPOG_HUMANPoly(A) polymerase gamma OS=Homo sapiens GN=PAPOLG PE=1 SV=2	736	sp|Q9BWT3|PAPOG_HUMANPoly(A) polymerase gamma OS=Homo sapiens GN=PAPOLG PE=1 SV=2	Q9BWT3	0	100	1517.67	736	736
Q6N075	MFSD5_HUMANMolybdate-anion transporter OS=Homo sapiens GN=MFSD5 PE=1 SV=2	450	sp|Q6N075|MFSD5_HUMANMolybdate-anion transporter OS=Homo sapiens GN=MFSD5 PE=1 SV=2	Q6N075	0	100	904.434	450	450
O00458	IFRD1_HUMANInterferon-related developmental regulator 1 OS=Homo sapiens GN=IFRD1 PE=1 SV=4	451	sp|O00458|IFRD1_HUMANInterferon-related developmental regulator 1 OS=Homo sapiens GN=IFRD1 PE=1 SV=4	O00458	0	100	936.406	451	451
F1JVV5	EWS_HUMANRNA-binding EWS OS=Homo sapiens GN=EWSR1 PE=1 SV=1	537	sp|Q01844|EWS_HUMANRNA-binding protein EWS OS=Homo sapiens GN=EWSR1 PE=1 SV=1	Q01844	0	98	598.971	331	325
A0A024R8I8	SAPC2_HUMANSuppressor APC domain-containing 2 OS=Homo sapiens GN=SAPCD2 PE=1 SV=2	394	sp|Q86UD0|SAPC2_HUMANSuppressor APC domain-containing protein 2 OS=Homo sapiens GN=SAPCD2 PE=1 SV=2	Q86UD0	0	99	762.296	394	392
B1ALI9	TXNIP_HUMANThioredoxin-interacting OS=Homo sapiens GN=TXNIP PE=1 SV=1	304	sp|Q9H3M7|TXNIP_HUMANThioredoxin-interacting protein OS=Homo sapiens GN=TXNIP PE=1 SV=1	Q9H3M7	0	100	575.474	278	278
B3KQT6	TSN13_HUMANTetraspanin-13 OS=Homo sapiens GN=TSPAN13 PE=2 SV=1	204	sp|O95857|TSN13_HUMANTetraspanin-13 OS=Homo sapiens GN=TSPAN13 PE=2 SV=1	O95857	5.85949e-145	99	405.986	204	203
D6RBJ7	VTDB_HUMANVitamin D-binding OS=Homo sapiens GN=GC PE=1 SV=1	348	sp|P02774|VTDB_HUMANVitamin D-binding protein OS=Homo sapiens GN=GC PE=1 SV=1	P02774	0	99	709.523	348	346
B0AZV9	TPC6B_HUMANTrafficking particle complex subunit 6B OS=Homo sapiens GN=TRAPPC6B PE=1 SV=1	94	sp|Q86SZ2|TPC6B_HUMANTrafficking protein particle complex subunit 6B OS=Homo sapiens GN=TRAPPC6B PE=1 SV=1	Q86SZ2	8.91518e-66	100	198.364	94	94
B4DND9	GSCR2_HUMANGlioma tumor suppressor candidate region gene 2 OS=Homo sapiens GN=GLTSCR2 PE=1 SV=2	426	sp|Q9NZM5|GSCR2_HUMANGlioma tumor suppressor candidate region gene 2 protein OS=Homo sapiens GN=GLTSCR2 PE=1 SV=2	Q9NZM5	0	89	823.157	478	426
Q4G148	GXLT1_HUMANGlucoside xylosyltransferase 1 OS=Homo sapiens GN=GXYLT1 PE=1 SV=2	440	sp|Q4G148|GXLT1_HUMANGlucoside xylosyltransferase 1 OS=Homo sapiens GN=GXYLT1 PE=1 SV=2	Q4G148	0	100	924.08	440	440
E9PM82	ASCC1_HUMANActivating signal cointegrator 1 complex subunit 1 OS=Homo sapiens GN=ASCC1 PE=1 SV=1	124	sp|Q8N9N2|ASCC1_HUMANActivating signal cointegrator 1 complex subunit 1 OS=Homo sapiens GN=ASCC1 PE=1 SV=1	Q8N9N2	2.64872e-80	81	244.973	152	124
Q5T440	CAF17_HUMAN transferase mitochondrial OS=Homo sapiens GN=IBA57 PE=1 SV=1	356	sp|Q5T440|CAF17_HUMANPutative transferase CAF17, mitochondrial OS=Homo sapiens GN=IBA57 PE=1 SV=1	Q5T440	0	100	712.605	356	356
B4E1V0	TRFL_HUMANLactotransferrin OS=Homo sapiens GN=LTF PE=1 SV=6	300	sp|P02788|TRFL_HUMANLactotransferrin OS=Homo sapiens GN=LTF PE=1 SV=6	P02788	0	100	624.009	300	300
Q5T985	ITIH2_HUMANInter-alpha-trypsin inhibitor heavy chain H2 OS=Homo sapiens GN=ITIH2 PE=1 SV=2	935	sp|P19823|ITIH2_HUMANInter-alpha-trypsin inhibitor heavy chain H2 OS=Homo sapiens GN=ITIH2 PE=1 SV=2	P19823	0	98	1932.53	946	935
Q9P1Y5	CAMP3_HUMANCalmodulin-regulated spectrin-associated 3 OS=Homo sapiens GN=CAMSAP3 PE=1 SV=2	1249	sp|Q9P1Y5|CAMP3_HUMANCalmodulin-regulated spectrin-associated protein 3 OS=Homo sapiens GN=CAMSAP3 PE=1 SV=2	Q9P1Y5	0	100	2494.15	1249	1249
Q8IY37	DHX37_HUMANProbable ATP-dependent RNA helicase DHX37 OS=Homo sapiens GN=DHX37 PE=1 SV=1	1157	sp|Q8IY37|DHX37_HUMANProbable ATP-dependent RNA helicase DHX37 OS=Homo sapiens GN=DHX37 PE=1 SV=1	Q8IY37	0	100	2362.8	1157	1157
Q9ULR3	PPM1H_HUMAN phosphatase 1H OS=Homo sapiens GN=PPM1H PE=1 SV=2	514	sp|Q9ULR3|PPM1H_HUMANProtein phosphatase 1H OS=Homo sapiens GN=PPM1H PE=1 SV=2	Q9ULR3	0	100	1064.68	514	514
H7C5E8	TRFE_HUMANSerotransferrin OS=Homo sapiens GN=TF PE=1 SV=3	143	sp|P02787|TRFE_HUMANSerotransferrin OS=Homo sapiens GN=TF PE=1 SV=3	P02787	1.63419e-79	100	251.136	118	118
B3KRB7	IKKB_HUMANInhibitor of nuclear factor kappa-B kinase subunit beta OS=Homo sapiens GN=IKBKB PE=1 SV=1	533	sp|O14920|IKKB_HUMANInhibitor of nuclear factor kappa-B kinase subunit beta OS=Homo sapiens GN=IKBKB PE=1 SV=1	O14920	0	100	1072.77	525	525
B4DMI9	DLGP5_HUMANDisks large-associated 5 OS=Homo sapiens GN=DLGAP5 PE=1 SV=2	792	sp|Q15398|DLGP5_HUMANDisks large-associated protein 5 OS=Homo sapiens GN=DLGAP5 PE=1 SV=2	Q15398	0	93	1605.5	846	790
Q96RG4	IRS2_HUMANInsulin receptor substrate 2 OS=Homo sapiens GN=IRS2 PE=1 SV=2	1338	sp|Q9Y4H2|IRS2_HUMANInsulin receptor substrate 2 OS=Homo sapiens GN=IRS2 PE=1 SV=2	Q9Y4H2	0	99	2638.22	1338	1337
Q8TB52	FBX30_HUMANF-box only 30 OS=Homo sapiens GN=FBXO30 PE=1 SV=3	745	sp|Q8TB52|FBX30_HUMANF-box only protein 30 OS=Homo sapiens GN=FBXO30 PE=1 SV=3	Q8TB52	0	100	1550.41	745	745
B4DQK1	ATG7_HUMANUbiquitin-like modifier-activating enzyme ATG7 OS=Homo sapiens GN=ATG7 PE=1 SV=1	681	sp|O95352|ATG7_HUMANUbiquitin-like modifier-activating enzyme ATG7 OS=Homo sapiens GN=ATG7 PE=1 SV=1	O95352	0	96	1402.11	703	680
A0A140VJE0	ADK_HUMANAdenosine kinase OS=Homo sapiens GN=ADK PE=1 SV=2	345	sp|P55263|ADK_HUMANAdenosine kinase OS=Homo sapiens GN=ADK PE=1 SV=2	P55263	0	100	715.687	343	343
B7Z8Q4	HEMO_HUMANHemopexin OS=Homo sapiens GN=HPX PE=1 SV=2	142	sp|P02790|HEMO_HUMANHemopexin OS=Homo sapiens GN=HPX PE=1 SV=2	P02790	5.95928e-73	99	228.409	112	111
Q12872	SFSWA_HUMANSplicing suppressor of white-apricot homolog OS=Homo sapiens GN=SFSWAP PE=1 SV=3	951	sp|Q12872|SFSWA_HUMANSplicing factor, suppressor of white-apricot homolog OS=Homo sapiens GN=SFSWAP PE=1 SV=3	Q12872	0	100	1933.3	951	951
B3KMT5	ECD_HUMAN ecdysoneless homolog OS=Homo sapiens GN=ECD PE=1 SV=1	644	sp|O95905|ECD_HUMANProtein ecdysoneless homolog OS=Homo sapiens GN=ECD PE=1 SV=1	O95905	0	99	1331.62	644	643
O00767	ACOD_HUMANAcyl- desaturase OS=Homo sapiens GN=SCD PE=1 SV=2	359	sp|O00767|ACOD_HUMANAcyl-CoA desaturase OS=Homo sapiens GN=SCD PE=1 SV=2	O00767	0	100	748.429	359	359
O60287	NPA1P_HUMANNucleolar pre-ribosomal-associated 1 OS=Homo sapiens GN=URB1 PE=1 SV=4	2271	sp|O60287|NPA1P_HUMANNucleolar pre-ribosomal-associated protein 1 OS=Homo sapiens GN=URB1 PE=1 SV=4	O60287	0	100	4651.66	2271	2271
Q53RD8	ZC3H8_HUMANZinc finger CCCH domain-containing 8 OS=Homo sapiens GN=ZC3H8 PE=1 SV=2	266	sp|Q8N5P1|ZC3H8_HUMANZinc finger CCCH domain-containing protein 8 OS=Homo sapiens GN=ZC3H8 PE=1 SV=2	Q8N5P1	0	100	548.51	266	266
P01023	A2MG_HUMANAlpha-2-macroglobulin OS=Homo sapiens GN=A2M PE=1 SV=3	1474	sp|P01023|A2MG_HUMANAlpha-2-macroglobulin OS=Homo sapiens GN=A2M PE=1 SV=3	P01023	0	100	3059.63	1474	1474
H3BQH3	KLDC4_HUMANKelch domain-containing 4 OS=Homo sapiens GN=KLHDC4 PE=1 SV=1	334	sp|Q8TBB5|KLDC4_HUMANKelch domain-containing protein 4 OS=Homo sapiens GN=KLHDC4 PE=1 SV=1	Q8TBB5	0	98	629.787	307	303
G5E9A6	UBP11_HUMANUbiquitin carboxyl-terminal hydrolase 11 OS=Homo sapiens GN=USP11 PE=1 SV=3	920	sp|P51784|UBP11_HUMANUbiquitin carboxyl-terminal hydrolase 11 OS=Homo sapiens GN=USP11 PE=1 SV=3	P51784	0	100	1920.98	920	920
Q7Z6E9	RBBP6_HUMANE3 ubiquitin- ligase RBBP6 OS=Homo sapiens GN=RBBP6 PE=1 SV=1	1792	sp|Q7Z6E9|RBBP6_HUMANE3 ubiquitin-protein ligase RBBP6 OS=Homo sapiens GN=RBBP6 PE=1 SV=1	Q7Z6E9	0	100	3633.57	1792	1792
B7Z8R6	AMBP_HUMAN AMBP OS=Homo sapiens GN=AMBP PE=1 SV=1	270	sp|P02760|AMBP_HUMANProtein AMBP OS=Homo sapiens GN=AMBP PE=1 SV=1	P02760	2.61126e-167	98	471.47	231	227
B3KXW2	ZN532_HUMANZinc finger 532 OS=Homo sapiens GN=ZNF532 PE=1 SV=2	1301	sp|Q9HCE3|ZN532_HUMANZinc finger protein 532 OS=Homo sapiens GN=ZNF532 PE=1 SV=2	Q9HCE3	0	99	2678.28	1301	1300
A0A087WVA8	TEX2_HUMANTestis-expressed sequence 2 OS=Homo sapiens GN=TEX2 PE=1 SV=2	1127	sp|Q8IWB9|TEX2_HUMANTestis-expressed sequence 2 protein OS=Homo sapiens GN=TEX2 PE=1 SV=2	Q8IWB9	0	99	2284.6	1127	1122
B4DMX4	FETA_HUMANAlpha-feto OS=Homo sapiens GN=AFP PE=1 SV=1	451	sp|P02771|FETA_HUMANAlpha-fetoprotein OS=Homo sapiens GN=AFP PE=1 SV=1	P02771	0	100	932.939	451	451
Q96HP0	DOCK6_HUMANDedicator of cytokinesis 6 OS=Homo sapiens GN=DOCK6 PE=1 SV=3	2047	sp|Q96HP0|DOCK6_HUMANDedicator of cytokinesis protein 6 OS=Homo sapiens GN=DOCK6 PE=1 SV=3	Q96HP0	0	100	4205.59	2047	2047

## Sheet: protein2go
GO function annotation and analysis different expressed proteins of ACBP-OXA vs. control protein2go
SeqName	Hit_Desc	GO_Group	GO_ID	Term
G3V1D1	FRIH_HUMANFerritin heavy chain OS=Homo sapiens GN=FTH1 PE=1 SV=2	C	GO:0005634	nucleus
G3V1D1	FRIH_HUMANFerritin heavy chain OS=Homo sapiens GN=FTH1 PE=1 SV=2	C	GO:0005829	cytosol
G3V1D1	FRIH_HUMANFerritin heavy chain OS=Homo sapiens GN=FTH1 PE=1 SV=2	C	GO:0008043	intracellular ferritin complex
G3V1D1	FRIH_HUMANFerritin heavy chain OS=Homo sapiens GN=FTH1 PE=1 SV=2	C	GO:0070062	extracellular vesicular exosome
G3V1D1	FRIH_HUMANFerritin heavy chain OS=Homo sapiens GN=FTH1 PE=1 SV=2	F	GO:0005515	protein binding
G3V1D1	FRIH_HUMANFerritin heavy chain OS=Homo sapiens GN=FTH1 PE=1 SV=2	F	GO:0008199	ferric iron binding
G3V1D1	FRIH_HUMANFerritin heavy chain OS=Homo sapiens GN=FTH1 PE=1 SV=2	P	GO:0006826	iron ion transport
G3V1D1	FRIH_HUMANFerritin heavy chain OS=Homo sapiens GN=FTH1 PE=1 SV=2	P	GO:0006880	intracellular sequestering of iron ion
G3V1D1	FRIH_HUMANFerritin heavy chain OS=Homo sapiens GN=FTH1 PE=1 SV=2	P	GO:0008284	positive regulation of cell proliferation
G3V1D1	FRIH_HUMANFerritin heavy chain OS=Homo sapiens GN=FTH1 PE=1 SV=2	P	GO:0048147	negative regulation of fibroblast proliferation
G3V1D1	FRIH_HUMANFerritin heavy chain OS=Homo sapiens GN=FTH1 PE=1 SV=2	N	GO:1904231
G3V1D1	FRIH_HUMANFerritin heavy chain OS=Homo sapiens GN=FTH1 PE=1 SV=2	N	GO:1904234
Q9H3K6	BOLA2_HUMAN 2 OS=Homo sapiens GN=BOLA2 PE=1 SV=1	C	GO:0070062	extracellular vesicular exosome
D3YTB1	RL32_HUMAN60S ribosomal L32 OS=Homo sapiens GN=RPL32 PE=1 SV=2	C	GO:0016020	membrane
D3YTB1	RL32_HUMAN60S ribosomal L32 OS=Homo sapiens GN=RPL32 PE=1 SV=2	C	GO:0022625	cytosolic large ribosomal subunit
D3YTB1	RL32_HUMAN60S ribosomal L32 OS=Homo sapiens GN=RPL32 PE=1 SV=2	F	GO:0003735	structural constituent of ribosome
D3YTB1	RL32_HUMAN60S ribosomal L32 OS=Homo sapiens GN=RPL32 PE=1 SV=2	N	GO:0044822
D3YTB1	RL32_HUMAN60S ribosomal L32 OS=Homo sapiens GN=RPL32 PE=1 SV=2	P	GO:0000184	nuclear-transcribed mRNA catabolic process, nonsense-mediated decay
D3YTB1	RL32_HUMAN60S ribosomal L32 OS=Homo sapiens GN=RPL32 PE=1 SV=2	P	GO:0006364	rRNA processing
D3YTB1	RL32_HUMAN60S ribosomal L32 OS=Homo sapiens GN=RPL32 PE=1 SV=2	P	GO:0006413	translational initiation
D3YTB1	RL32_HUMAN60S ribosomal L32 OS=Homo sapiens GN=RPL32 PE=1 SV=2	P	GO:0006614	SRP-dependent cotranslational protein targeting to membrane
D3YTB1	RL32_HUMAN60S ribosomal L32 OS=Homo sapiens GN=RPL32 PE=1 SV=2	P	GO:0019083	viral transcription
S4R456	RS15_HUMAN40S ribosomal S15 OS=Homo sapiens GN=RPS15 PE=1 SV=2	C	GO:0005654	nucleoplasm
S4R456	RS15_HUMAN40S ribosomal S15 OS=Homo sapiens GN=RPS15 PE=1 SV=2	C	GO:0005925	focal adhesion
S4R456	RS15_HUMAN40S ribosomal S15 OS=Homo sapiens GN=RPS15 PE=1 SV=2	C	GO:0016020	membrane
S4R456	RS15_HUMAN40S ribosomal S15 OS=Homo sapiens GN=RPS15 PE=1 SV=2	C	GO:0022627	cytosolic small ribosomal subunit
S4R456	RS15_HUMAN40S ribosomal S15 OS=Homo sapiens GN=RPS15 PE=1 SV=2	F	GO:0003735	structural constituent of ribosome
S4R456	RS15_HUMAN40S ribosomal S15 OS=Homo sapiens GN=RPS15 PE=1 SV=2	F	GO:0005515	protein binding
S4R456	RS15_HUMAN40S ribosomal S15 OS=Homo sapiens GN=RPS15 PE=1 SV=2	N	GO:0044822
S4R456	RS15_HUMAN40S ribosomal S15 OS=Homo sapiens GN=RPS15 PE=1 SV=2	P	GO:0000056	ribosomal small subunit export from nucleus
S4R456	RS15_HUMAN40S ribosomal S15 OS=Homo sapiens GN=RPS15 PE=1 SV=2	P	GO:0000184	nuclear-transcribed mRNA catabolic process, nonsense-mediated decay
S4R456	RS15_HUMAN40S ribosomal S15 OS=Homo sapiens GN=RPS15 PE=1 SV=2	P	GO:0001649	osteoblast differentiation
S4R456	RS15_HUMAN40S ribosomal S15 OS=Homo sapiens GN=RPS15 PE=1 SV=2	P	GO:0006364	rRNA processing
S4R456	RS15_HUMAN40S ribosomal S15 OS=Homo sapiens GN=RPS15 PE=1 SV=2	P	GO:0006413	translational initiation
S4R456	RS15_HUMAN40S ribosomal S15 OS=Homo sapiens GN=RPS15 PE=1 SV=2	P	GO:0006614	SRP-dependent cotranslational protein targeting to membrane
S4R456	RS15_HUMAN40S ribosomal S15 OS=Homo sapiens GN=RPS15 PE=1 SV=2	P	GO:0019083	viral transcription
S4R456	RS15_HUMAN40S ribosomal S15 OS=Homo sapiens GN=RPS15 PE=1 SV=2	P	GO:0042274	ribosomal small subunit biogenesis
C9K025	RL35A_HUMAN60S ribosomal L35a OS=Homo sapiens GN=RPL35A PE=1 SV=2	C	GO:0016020	membrane
C9K025	RL35A_HUMAN60S ribosomal L35a OS=Homo sapiens GN=RPL35A PE=1 SV=2	C	GO:0022625	cytosolic large ribosomal subunit
C9K025	RL35A_HUMAN60S ribosomal L35a OS=Homo sapiens GN=RPL35A PE=1 SV=2	C	GO:0070062	extracellular vesicular exosome
C9K025	RL35A_HUMAN60S ribosomal L35a OS=Homo sapiens GN=RPL35A PE=1 SV=2	F	GO:0003735	structural constituent of ribosome
C9K025	RL35A_HUMAN60S ribosomal L35a OS=Homo sapiens GN=RPL35A PE=1 SV=2	F	GO:0005515	protein binding
C9K025	RL35A_HUMAN60S ribosomal L35a OS=Homo sapiens GN=RPL35A PE=1 SV=2	N	GO:0044822
C9K025	RL35A_HUMAN60S ribosomal L35a OS=Homo sapiens GN=RPL35A PE=1 SV=2	P	GO:0000184	nuclear-transcribed mRNA catabolic process, nonsense-mediated decay
C9K025	RL35A_HUMAN60S ribosomal L35a OS=Homo sapiens GN=RPL35A PE=1 SV=2	P	GO:0006364	rRNA processing
C9K025	RL35A_HUMAN60S ribosomal L35a OS=Homo sapiens GN=RPL35A PE=1 SV=2	P	GO:0006413	translational initiation
C9K025	RL35A_HUMAN60S ribosomal L35a OS=Homo sapiens GN=RPL35A PE=1 SV=2	P	GO:0006614	SRP-dependent cotranslational protein targeting to membrane
C9K025	RL35A_HUMAN60S ribosomal L35a OS=Homo sapiens GN=RPL35A PE=1 SV=2	P	GO:0019083	viral transcription
C9K025	RL35A_HUMAN60S ribosomal L35a OS=Homo sapiens GN=RPL35A PE=1 SV=2	P	GO:0042273	ribosomal large subunit biogenesis
B7Z2S5	TRXR1_HUMANThioredoxin reductase cytoplasmic OS=Homo sapiens GN=TXNRD1 PE=1 SV=3	C	GO:0005829	cytosol
B7Z2S5	TRXR1_HUMANThioredoxin reductase cytoplasmic OS=Homo sapiens GN=TXNRD1 PE=1 SV=3	C	GO:0043231	intracellular membrane-bounded organelle
B7Z2S5	TRXR1_HUMANThioredoxin reductase cytoplasmic OS=Homo sapiens GN=TXNRD1 PE=1 SV=3	C	GO:0070062	extracellular vesicular exosome
B7Z2S5	TRXR1_HUMANThioredoxin reductase cytoplasmic OS=Homo sapiens GN=TXNRD1 PE=1 SV=3	F	GO:0004791	thioredoxin-disulfide reductase activity
B7Z2S5	TRXR1_HUMANThioredoxin reductase cytoplasmic OS=Homo sapiens GN=TXNRD1 PE=1 SV=3	F	GO:0005515	protein binding
B7Z2S5	TRXR1_HUMANThioredoxin reductase cytoplasmic OS=Homo sapiens GN=TXNRD1 PE=1 SV=3	F	GO:0009055	electron carrier activity
B7Z2S5	TRXR1_HUMANThioredoxin reductase cytoplasmic OS=Homo sapiens GN=TXNRD1 PE=1 SV=3	F	GO:0015035	protein disulfide oxidoreductase activity
B7Z2S5	TRXR1_HUMANThioredoxin reductase cytoplasmic OS=Homo sapiens GN=TXNRD1 PE=1 SV=3	F	GO:0050660	flavin adenine dinucleotide binding
B7Z2S5	TRXR1_HUMANThioredoxin reductase cytoplasmic OS=Homo sapiens GN=TXNRD1 PE=1 SV=3	N	GO:0098625
B7Z2S5	TRXR1_HUMANThioredoxin reductase cytoplasmic OS=Homo sapiens GN=TXNRD1 PE=1 SV=3	N	GO:0098626
B7Z2S5	TRXR1_HUMANThioredoxin reductase cytoplasmic OS=Homo sapiens GN=TXNRD1 PE=1 SV=3	P	GO:0000302	response to reactive oxygen species
B7Z2S5	TRXR1_HUMANThioredoxin reductase cytoplasmic OS=Homo sapiens GN=TXNRD1 PE=1 SV=3	P	GO:0001887	selenium compound metabolic process
B7Z2S5	TRXR1_HUMANThioredoxin reductase cytoplasmic OS=Homo sapiens GN=TXNRD1 PE=1 SV=3	P	GO:0015949	nucleobase-containing small molecule interconversion
B7Z2S5	TRXR1_HUMANThioredoxin reductase cytoplasmic OS=Homo sapiens GN=TXNRD1 PE=1 SV=3	P	GO:0032501	multicellular organismal process
B7Z2S5	TRXR1_HUMANThioredoxin reductase cytoplasmic OS=Homo sapiens GN=TXNRD1 PE=1 SV=3	P	GO:0044767	single-organism developmental process
B7Z2S5	TRXR1_HUMANThioredoxin reductase cytoplasmic OS=Homo sapiens GN=TXNRD1 PE=1 SV=3	P	GO:0045454	cell redox homeostasis
B7Z2S5	TRXR1_HUMANThioredoxin reductase cytoplasmic OS=Homo sapiens GN=TXNRD1 PE=1 SV=3	P	GO:0048856	anatomical structure development
B7Z2S5	TRXR1_HUMANThioredoxin reductase cytoplasmic OS=Homo sapiens GN=TXNRD1 PE=1 SV=3	P	GO:0055114	oxidation-reduction process
B7Z2S5	TRXR1_HUMANThioredoxin reductase cytoplasmic OS=Homo sapiens GN=TXNRD1 PE=1 SV=3	P	GO:0006118	electron transport
B7Z2S5	TRXR1_HUMANThioredoxin reductase cytoplasmic OS=Homo sapiens GN=TXNRD1 PE=1 SV=3	P	GO:0006206	pyrimidine nucleobase metabolic process
P31350	RIR2_HUMANRibonucleoside-diphosphate reductase subunit M2 OS=Homo sapiens GN=RRM2 PE=1 SV=1	C	GO:0005654	nucleoplasm
P31350	RIR2_HUMANRibonucleoside-diphosphate reductase subunit M2 OS=Homo sapiens GN=RRM2 PE=1 SV=1	C	GO:0005829	cytosol
P31350	RIR2_HUMANRibonucleoside-diphosphate reductase subunit M2 OS=Homo sapiens GN=RRM2 PE=1 SV=1	C	GO:0070062	extracellular vesicular exosome
P31350	RIR2_HUMANRibonucleoside-diphosphate reductase subunit M2 OS=Homo sapiens GN=RRM2 PE=1 SV=1	F	GO:0005515	protein binding
P31350	RIR2_HUMANRibonucleoside-diphosphate reductase subunit M2 OS=Homo sapiens GN=RRM2 PE=1 SV=1	F	GO:0016491	oxidoreductase activity
P31350	RIR2_HUMANRibonucleoside-diphosphate reductase subunit M2 OS=Homo sapiens GN=RRM2 PE=1 SV=1	P	GO:0000083	regulation of transcription involved in G1/S transition of mitotic cell cycle
P31350	RIR2_HUMANRibonucleoside-diphosphate reductase subunit M2 OS=Homo sapiens GN=RRM2 PE=1 SV=1	P	GO:0009262	deoxyribonucleotide metabolic process
P31350	RIR2_HUMANRibonucleoside-diphosphate reductase subunit M2 OS=Homo sapiens GN=RRM2 PE=1 SV=1	P	GO:0015949	nucleobase-containing small molecule interconversion
P31350	RIR2_HUMANRibonucleoside-diphosphate reductase subunit M2 OS=Homo sapiens GN=RRM2 PE=1 SV=1	P	GO:0055114	oxidation-reduction process
P63173	RL38_HUMAN60S ribosomal L38 OS=Homo sapiens GN=RPL38 PE=1 SV=2	C	GO:0005925	focal adhesion
P63173	RL38_HUMAN60S ribosomal L38 OS=Homo sapiens GN=RPL38 PE=1 SV=2	C	GO:0022625	cytosolic large ribosomal subunit
P63173	RL38_HUMAN60S ribosomal L38 OS=Homo sapiens GN=RPL38 PE=1 SV=2	F	GO:0003723	RNA binding
P63173	RL38_HUMAN60S ribosomal L38 OS=Homo sapiens GN=RPL38 PE=1 SV=2	F	GO:0003735	structural constituent of ribosome
P63173	RL38_HUMAN60S ribosomal L38 OS=Homo sapiens GN=RPL38 PE=1 SV=2	P	GO:0000184	nuclear-transcribed mRNA catabolic process, nonsense-mediated decay
P63173	RL38_HUMAN60S ribosomal L38 OS=Homo sapiens GN=RPL38 PE=1 SV=2	P	GO:0006364	rRNA processing
P63173	RL38_HUMAN60S ribosomal L38 OS=Homo sapiens GN=RPL38 PE=1 SV=2	P	GO:0006413	translational initiation
P63173	RL38_HUMAN60S ribosomal L38 OS=Homo sapiens GN=RPL38 PE=1 SV=2	P	GO:0006614	SRP-dependent cotranslational protein targeting to membrane
P63173	RL38_HUMAN60S ribosomal L38 OS=Homo sapiens GN=RPL38 PE=1 SV=2	P	GO:0019083	viral transcription
P63173	RL38_HUMAN60S ribosomal L38 OS=Homo sapiens GN=RPL38 PE=1 SV=2	P	GO:0022618	ribonucleoprotein complex assembly
P63173	RL38_HUMAN60S ribosomal L38 OS=Homo sapiens GN=RPL38 PE=1 SV=2	P	GO:0032501	multicellular organismal process
O60701	UGDH_HUMANUDP-glucose 6-dehydrogenase OS=Homo sapiens GN=UGDH PE=1 SV=1	C	GO:0005654	nucleoplasm
O60701	UGDH_HUMANUDP-glucose 6-dehydrogenase OS=Homo sapiens GN=UGDH PE=1 SV=1	C	GO:0005829	cytosol
O60701	UGDH_HUMANUDP-glucose 6-dehydrogenase OS=Homo sapiens GN=UGDH PE=1 SV=1	C	GO:0070062	extracellular vesicular exosome
O60701	UGDH_HUMANUDP-glucose 6-dehydrogenase OS=Homo sapiens GN=UGDH PE=1 SV=1	F	GO:0003979	UDP-glucose 6-dehydrogenase activity
O60701	UGDH_HUMANUDP-glucose 6-dehydrogenase OS=Homo sapiens GN=UGDH PE=1 SV=1	F	GO:0009055	electron carrier activity
O60701	UGDH_HUMANUDP-glucose 6-dehydrogenase OS=Homo sapiens GN=UGDH PE=1 SV=1	F	GO:0051287	NAD binding
O60701	UGDH_HUMANUDP-glucose 6-dehydrogenase OS=Homo sapiens GN=UGDH PE=1 SV=1	P	GO:0006011	UDP-glucose metabolic process
O60701	UGDH_HUMANUDP-glucose 6-dehydrogenase OS=Homo sapiens GN=UGDH PE=1 SV=1	P	GO:0006024	glycosaminoglycan biosynthetic process
O60701	UGDH_HUMANUDP-glucose 6-dehydrogenase OS=Homo sapiens GN=UGDH PE=1 SV=1	P	GO:0006065	UDP-glucuronate biosynthetic process
O60701	UGDH_HUMANUDP-glucose 6-dehydrogenase OS=Homo sapiens GN=UGDH PE=1 SV=1	P	GO:0055114	oxidation-reduction process
O60701	UGDH_HUMANUDP-glucose 6-dehydrogenase OS=Homo sapiens GN=UGDH PE=1 SV=1	P	GO:0005982	starch metabolic process
O60701	UGDH_HUMANUDP-glucose 6-dehydrogenase OS=Homo sapiens GN=UGDH PE=1 SV=1	P	GO:0005985	sucrose metabolic process
O60701	UGDH_HUMANUDP-glucose 6-dehydrogenase OS=Homo sapiens GN=UGDH PE=1 SV=1	P	GO:0009117	nucleotide metabolic process
O60701	UGDH_HUMANUDP-glucose 6-dehydrogenase OS=Homo sapiens GN=UGDH PE=1 SV=1	P	GO:0006118	electron transport
Q5T123	SH3L3_HUMANSH3 domain-binding glutamic acid-rich 3 OS=Homo sapiens GN=SH3BGRL3 PE=1 SV=1	C	GO:0030027	lamellipodium
Q5T123	SH3L3_HUMANSH3 domain-binding glutamic acid-rich 3 OS=Homo sapiens GN=SH3BGRL3 PE=1 SV=1	C	GO:0070062	extracellular vesicular exosome
Q5T123	SH3L3_HUMANSH3 domain-binding glutamic acid-rich 3 OS=Homo sapiens GN=SH3BGRL3 PE=1 SV=1	F	GO:0005096	GTPase activator activity
Q5T123	SH3L3_HUMANSH3 domain-binding glutamic acid-rich 3 OS=Homo sapiens GN=SH3BGRL3 PE=1 SV=1	F	GO:0030215	semaphorin receptor binding
Q5T123	SH3L3_HUMANSH3 domain-binding glutamic acid-rich 3 OS=Homo sapiens GN=SH3BGRL3 PE=1 SV=1	P	GO:0030834	regulation of actin filament depolymerization
Q5T123	SH3L3_HUMANSH3 domain-binding glutamic acid-rich 3 OS=Homo sapiens GN=SH3BGRL3 PE=1 SV=1	P	GO:0043535	regulation of blood vessel endothelial cell migration
Q5T123	SH3L3_HUMANSH3 domain-binding glutamic acid-rich 3 OS=Homo sapiens GN=SH3BGRL3 PE=1 SV=1	P	GO:0043547	positive regulation of GTPase activity
Q5T123	SH3L3_HUMANSH3 domain-binding glutamic acid-rich 3 OS=Homo sapiens GN=SH3BGRL3 PE=1 SV=1	P	GO:0007165	signal transduction
B3KS36	RL3_HUMAN60S ribosomal L3 OS=Homo sapiens GN=RPL3 PE=1 SV=2	C	GO:0005654	nucleoplasm
B3KS36	RL3_HUMAN60S ribosomal L3 OS=Homo sapiens GN=RPL3 PE=1 SV=2	C	GO:0005730	nucleolus
B3KS36	RL3_HUMAN60S ribosomal L3 OS=Homo sapiens GN=RPL3 PE=1 SV=2	C	GO:0005925	focal adhesion
B3KS36	RL3_HUMAN60S ribosomal L3 OS=Homo sapiens GN=RPL3 PE=1 SV=2	C	GO:0022625	cytosolic large ribosomal subunit
B3KS36	RL3_HUMAN60S ribosomal L3 OS=Homo sapiens GN=RPL3 PE=1 SV=2	C	GO:0070062	extracellular vesicular exosome
B3KS36	RL3_HUMAN60S ribosomal L3 OS=Homo sapiens GN=RPL3 PE=1 SV=2	F	GO:0003735	structural constituent of ribosome
B3KS36	RL3_HUMAN60S ribosomal L3 OS=Homo sapiens GN=RPL3 PE=1 SV=2	F	GO:0005515	protein binding
B3KS36	RL3_HUMAN60S ribosomal L3 OS=Homo sapiens GN=RPL3 PE=1 SV=2	N	GO:0044822
B3KS36	RL3_HUMAN60S ribosomal L3 OS=Homo sapiens GN=RPL3 PE=1 SV=2	P	GO:0006412	translation
B3KS36	RL3_HUMAN60S ribosomal L3 OS=Homo sapiens GN=RPL3 PE=1 SV=2	P	GO:0016070	RNA metabolic process
B3KS36	RL3_HUMAN60S ribosomal L3 OS=Homo sapiens GN=RPL3 PE=1 SV=2	P	GO:0042254	ribosome biogenesis
A0A087WXM6	RL17_HUMAN60S ribosomal L17 OS=Homo sapiens GN=RPL17 PE=1 SV=3	C	GO:0005634	nucleus
A0A087WXM6	RL17_HUMAN60S ribosomal L17 OS=Homo sapiens GN=RPL17 PE=1 SV=3	C	GO:0022625	cytosolic large ribosomal subunit
A0A087WXM6	RL17_HUMAN60S ribosomal L17 OS=Homo sapiens GN=RPL17 PE=1 SV=3	F	GO:0003735	structural constituent of ribosome
A0A087WXM6	RL17_HUMAN60S ribosomal L17 OS=Homo sapiens GN=RPL17 PE=1 SV=3	F	GO:0005515	protein binding
A0A087WXM6	RL17_HUMAN60S ribosomal L17 OS=Homo sapiens GN=RPL17 PE=1 SV=3	N	GO:0044822
A0A087WXM6	RL17_HUMAN60S ribosomal L17 OS=Homo sapiens GN=RPL17 PE=1 SV=3	P	GO:0000184	nuclear-transcribed mRNA catabolic process, nonsense-mediated decay
A0A087WXM6	RL17_HUMAN60S ribosomal L17 OS=Homo sapiens GN=RPL17 PE=1 SV=3	P	GO:0006364	rRNA processing
A0A087WXM6	RL17_HUMAN60S ribosomal L17 OS=Homo sapiens GN=RPL17 PE=1 SV=3	P	GO:0006413	translational initiation
A0A087WXM6	RL17_HUMAN60S ribosomal L17 OS=Homo sapiens GN=RPL17 PE=1 SV=3	P	GO:0006614	SRP-dependent cotranslational protein targeting to membrane
A0A087WXM6	RL17_HUMAN60S ribosomal L17 OS=Homo sapiens GN=RPL17 PE=1 SV=3	P	GO:0019083	viral transcription
P39023	RL3_HUMAN60S ribosomal L3 OS=Homo sapiens GN=RPL3 PE=1 SV=2	C	GO:0005654	nucleoplasm
P39023	RL3_HUMAN60S ribosomal L3 OS=Homo sapiens GN=RPL3 PE=1 SV=2	C	GO:0005730	nucleolus
P39023	RL3_HUMAN60S ribosomal L3 OS=Homo sapiens GN=RPL3 PE=1 SV=2	C	GO:0005925	focal adhesion
P39023	RL3_HUMAN60S ribosomal L3 OS=Homo sapiens GN=RPL3 PE=1 SV=2	C	GO:0016020	membrane
P39023	RL3_HUMAN60S ribosomal L3 OS=Homo sapiens GN=RPL3 PE=1 SV=2	C	GO:0022625	cytosolic large ribosomal subunit
P39023	RL3_HUMAN60S ribosomal L3 OS=Homo sapiens GN=RPL3 PE=1 SV=2	C	GO:0070062	extracellular vesicular exosome
P39023	RL3_HUMAN60S ribosomal L3 OS=Homo sapiens GN=RPL3 PE=1 SV=2	F	GO:0003735	structural constituent of ribosome
P39023	RL3_HUMAN60S ribosomal L3 OS=Homo sapiens GN=RPL3 PE=1 SV=2	F	GO:0005515	protein binding
P39023	RL3_HUMAN60S ribosomal L3 OS=Homo sapiens GN=RPL3 PE=1 SV=2	N	GO:0044822
P39023	RL3_HUMAN60S ribosomal L3 OS=Homo sapiens GN=RPL3 PE=1 SV=2	P	GO:0000184	nuclear-transcribed mRNA catabolic process, nonsense-mediated decay
P39023	RL3_HUMAN60S ribosomal L3 OS=Homo sapiens GN=RPL3 PE=1 SV=2	P	GO:0006364	rRNA processing
P39023	RL3_HUMAN60S ribosomal L3 OS=Homo sapiens GN=RPL3 PE=1 SV=2	P	GO:0006413	translational initiation
P39023	RL3_HUMAN60S ribosomal L3 OS=Homo sapiens GN=RPL3 PE=1 SV=2	P	GO:0006614	SRP-dependent cotranslational protein targeting to membrane
P39023	RL3_HUMAN60S ribosomal L3 OS=Homo sapiens GN=RPL3 PE=1 SV=2	P	GO:0019083	viral transcription
K7ER90	EIF3G_HUMANEukaryotic translation initiation factor 3 subunit G OS=Homo sapiens GN=EIF3G PE=1 SV=2	C	GO:0005634	nucleus
K7ER90	EIF3G_HUMANEukaryotic translation initiation factor 3 subunit G OS=Homo sapiens GN=EIF3G PE=1 SV=2	C	GO:0005852	eukaryotic translation initiation factor 3 complex
K7ER90	EIF3G_HUMANEukaryotic translation initiation factor 3 subunit G OS=Homo sapiens GN=EIF3G PE=1 SV=2	F	GO:0000166	nucleotide binding
K7ER90	EIF3G_HUMANEukaryotic translation initiation factor 3 subunit G OS=Homo sapiens GN=EIF3G PE=1 SV=2	F	GO:0003743	translation initiation factor activity
K7ER90	EIF3G_HUMANEukaryotic translation initiation factor 3 subunit G OS=Homo sapiens GN=EIF3G PE=1 SV=2	F	GO:0005515	protein binding
K7ER90	EIF3G_HUMANEukaryotic translation initiation factor 3 subunit G OS=Homo sapiens GN=EIF3G PE=1 SV=2	N	GO:0044822
K7ER90	EIF3G_HUMANEukaryotic translation initiation factor 3 subunit G OS=Homo sapiens GN=EIF3G PE=1 SV=2	P	GO:0075525	viral translational termination-reinitiation
K7ER90	EIF3G_HUMANEukaryotic translation initiation factor 3 subunit G OS=Homo sapiens GN=EIF3G PE=1 SV=2	C	GO:0005840	ribosome
K7ER90	EIF3G_HUMANEukaryotic translation initiation factor 3 subunit G OS=Homo sapiens GN=EIF3G PE=1 SV=2	P	GO:0006446	regulation of translational initiation
P48506	GSH1_HUMANGlutamate--cysteine ligase catalytic subunit OS=Homo sapiens GN=GCLC PE=1 SV=2	C	GO:0005829	cytosol
P48506	GSH1_HUMANGlutamate--cysteine ligase catalytic subunit OS=Homo sapiens GN=GCLC PE=1 SV=2	F	GO:0000287	magnesium ion binding
P48506	GSH1_HUMANGlutamate--cysteine ligase catalytic subunit OS=Homo sapiens GN=GCLC PE=1 SV=2	F	GO:0004357	glutamate-cysteine ligase activity
P48506	GSH1_HUMANGlutamate--cysteine ligase catalytic subunit OS=Homo sapiens GN=GCLC PE=1 SV=2	F	GO:0016595	glutamate binding
P48506	GSH1_HUMANGlutamate--cysteine ligase catalytic subunit OS=Homo sapiens GN=GCLC PE=1 SV=2	F	GO:0043531	ADP binding
P48506	GSH1_HUMANGlutamate--cysteine ligase catalytic subunit OS=Homo sapiens GN=GCLC PE=1 SV=2	F	GO:0050662	coenzyme binding
P48506	GSH1_HUMANGlutamate--cysteine ligase catalytic subunit OS=Homo sapiens GN=GCLC PE=1 SV=2	P	GO:0000096	sulfur amino acid metabolic process
P48506	GSH1_HUMANGlutamate--cysteine ligase catalytic subunit OS=Homo sapiens GN=GCLC PE=1 SV=2	P	GO:0006534	cysteine metabolic process
P48506	GSH1_HUMANGlutamate--cysteine ligase catalytic subunit OS=Homo sapiens GN=GCLC PE=1 SV=2	P	GO:0006536	glutamate metabolic process
P48506	GSH1_HUMANGlutamate--cysteine ligase catalytic subunit OS=Homo sapiens GN=GCLC PE=1 SV=2	P	GO:0006750	glutathione biosynthetic process
P48506	GSH1_HUMANGlutamate--cysteine ligase catalytic subunit OS=Homo sapiens GN=GCLC PE=1 SV=2	P	GO:0006979	response to oxidative stress
P48506	GSH1_HUMANGlutamate--cysteine ligase catalytic subunit OS=Homo sapiens GN=GCLC PE=1 SV=2	P	GO:0009408	response to heat
P48506	GSH1_HUMANGlutamate--cysteine ligase catalytic subunit OS=Homo sapiens GN=GCLC PE=1 SV=2	P	GO:0009725	response to hormone stimulus
P48506	GSH1_HUMANGlutamate--cysteine ligase catalytic subunit OS=Homo sapiens GN=GCLC PE=1 SV=2	P	GO:0043066	negative regulation of apoptotic process
P48506	GSH1_HUMANGlutamate--cysteine ligase catalytic subunit OS=Homo sapiens GN=GCLC PE=1 SV=2	P	GO:0045454	cell redox homeostasis
P48506	GSH1_HUMANGlutamate--cysteine ligase catalytic subunit OS=Homo sapiens GN=GCLC PE=1 SV=2	P	GO:0045892	negative regulation of transcription, DNA-dependent
P48506	GSH1_HUMANGlutamate--cysteine ligase catalytic subunit OS=Homo sapiens GN=GCLC PE=1 SV=2	P	GO:0050880	regulation of blood vessel size
P48506	GSH1_HUMANGlutamate--cysteine ligase catalytic subunit OS=Homo sapiens GN=GCLC PE=1 SV=2	C	GO:0017109	glutamate-cysteine ligase complex
A0A024RDF4	HNRPD_HUMANHeterogeneous nuclear ribonucleo D0 OS=Homo sapiens GN=HNRNPD PE=1 SV=1	C	GO:0005654	nucleoplasm
A0A024RDF4	HNRPD_HUMANHeterogeneous nuclear ribonucleo D0 OS=Homo sapiens GN=HNRNPD PE=1 SV=1	C	GO:0030529	ribonucleoprotein complex
A0A024RDF4	HNRPD_HUMANHeterogeneous nuclear ribonucleo D0 OS=Homo sapiens GN=HNRNPD PE=1 SV=1	C	GO:0070062	extracellular vesicular exosome
A0A024RDF4	HNRPD_HUMANHeterogeneous nuclear ribonucleo D0 OS=Homo sapiens GN=HNRNPD PE=1 SV=1	F	GO:0000166	nucleotide binding
A0A024RDF4	HNRPD_HUMANHeterogeneous nuclear ribonucleo D0 OS=Homo sapiens GN=HNRNPD PE=1 SV=1	F	GO:0005515	protein binding
A0A024RDF4	HNRPD_HUMANHeterogeneous nuclear ribonucleo D0 OS=Homo sapiens GN=HNRNPD PE=1 SV=1	F	GO:0042162	telomeric DNA binding
A0A024RDF4	HNRPD_HUMANHeterogeneous nuclear ribonucleo D0 OS=Homo sapiens GN=HNRNPD PE=1 SV=1	N	GO:0044822
A0A024RDF4	HNRPD_HUMANHeterogeneous nuclear ribonucleo D0 OS=Homo sapiens GN=HNRNPD PE=1 SV=1	P	GO:0006396	RNA processing
A0A024RDF4	HNRPD_HUMANHeterogeneous nuclear ribonucleo D0 OS=Homo sapiens GN=HNRNPD PE=1 SV=1	P	GO:0010629	negative regulation of gene expression
A0A024RDF4	HNRPD_HUMANHeterogeneous nuclear ribonucleo D0 OS=Homo sapiens GN=HNRNPD PE=1 SV=1	P	GO:0031324	negative regulation of cellular metabolic process
A0A024RDF4	HNRPD_HUMANHeterogeneous nuclear ribonucleo D0 OS=Homo sapiens GN=HNRNPD PE=1 SV=1	P	GO:0042752	regulation of circadian rhythm
A0A024RDF4	HNRPD_HUMANHeterogeneous nuclear ribonucleo D0 OS=Homo sapiens GN=HNRNPD PE=1 SV=1	P	GO:0043488	regulation of mRNA stability
A0A024RDF4	HNRPD_HUMANHeterogeneous nuclear ribonucleo D0 OS=Homo sapiens GN=HNRNPD PE=1 SV=1	P	GO:0044763	single-organism cellular process
A0A024RDF4	HNRPD_HUMANHeterogeneous nuclear ribonucleo D0 OS=Homo sapiens GN=HNRNPD PE=1 SV=1	P	GO:0045727	positive regulation of translation
A0A024RDF4	HNRPD_HUMANHeterogeneous nuclear ribonucleo D0 OS=Homo sapiens GN=HNRNPD PE=1 SV=1	P	GO:0048513	organ development
A0A024RDF4	HNRPD_HUMANHeterogeneous nuclear ribonucleo D0 OS=Homo sapiens GN=HNRNPD PE=1 SV=1	P	GO:0050658	RNA transport
A0A024RDF4	HNRPD_HUMANHeterogeneous nuclear ribonucleo D0 OS=Homo sapiens GN=HNRNPD PE=1 SV=1	P	GO:0051172	negative regulation of nitrogen compound metabolic process
A0A024RDF4	HNRPD_HUMANHeterogeneous nuclear ribonucleo D0 OS=Homo sapiens GN=HNRNPD PE=1 SV=1	P	GO:0051252	regulation of RNA metabolic process
A0A024RDF4	HNRPD_HUMANHeterogeneous nuclear ribonucleo D0 OS=Homo sapiens GN=HNRNPD PE=1 SV=1	P	GO:0071310	cellular response to organic substance
A0A024RDF4	HNRPD_HUMANHeterogeneous nuclear ribonucleo D0 OS=Homo sapiens GN=HNRNPD PE=1 SV=1	P	GO:0097167	circadian regulation of translation
A0A024RDF4	HNRPD_HUMANHeterogeneous nuclear ribonucleo D0 OS=Homo sapiens GN=HNRNPD PE=1 SV=1	P	GO:1901698	response to nitrogen compound
Q71UM5	RS27L_HUMAN40S ribosomal S27-like OS=Homo sapiens GN=RPS27L PE=1 SV=3	C	GO:0005654	nucleoplasm
Q71UM5	RS27L_HUMAN40S ribosomal S27-like OS=Homo sapiens GN=RPS27L PE=1 SV=3	C	GO:0022627	cytosolic small ribosomal subunit
Q71UM5	RS27L_HUMAN40S ribosomal S27-like OS=Homo sapiens GN=RPS27L PE=1 SV=3	F	GO:0003735	structural constituent of ribosome
Q71UM5	RS27L_HUMAN40S ribosomal S27-like OS=Homo sapiens GN=RPS27L PE=1 SV=3	F	GO:0005515	protein binding
Q71UM5	RS27L_HUMAN40S ribosomal S27-like OS=Homo sapiens GN=RPS27L PE=1 SV=3	F	GO:0008494	translation activator activity
Q71UM5	RS27L_HUMAN40S ribosomal S27-like OS=Homo sapiens GN=RPS27L PE=1 SV=3	F	GO:0008656	cysteine-type endopeptidase activator activity involved in apoptotic process
Q71UM5	RS27L_HUMAN40S ribosomal S27-like OS=Homo sapiens GN=RPS27L PE=1 SV=3	N	GO:0044822
Q71UM5	RS27L_HUMAN40S ribosomal S27-like OS=Homo sapiens GN=RPS27L PE=1 SV=3	P	GO:0000090	mitotic anaphase
Q71UM5	RS27L_HUMAN40S ribosomal S27-like OS=Homo sapiens GN=RPS27L PE=1 SV=3	P	GO:0000184	nuclear-transcribed mRNA catabolic process, nonsense-mediated decay
Q71UM5	RS27L_HUMAN40S ribosomal S27-like OS=Homo sapiens GN=RPS27L PE=1 SV=3	P	GO:0000236	mitotic prometaphase
Q71UM5	RS27L_HUMAN40S ribosomal S27-like OS=Homo sapiens GN=RPS27L PE=1 SV=3	P	GO:0006281	DNA repair
Q71UM5	RS27L_HUMAN40S ribosomal S27-like OS=Homo sapiens GN=RPS27L PE=1 SV=3	P	GO:0006364	rRNA processing
Q71UM5	RS27L_HUMAN40S ribosomal S27-like OS=Homo sapiens GN=RPS27L PE=1 SV=3	P	GO:0006614	SRP-dependent cotranslational protein targeting to membrane
Q71UM5	RS27L_HUMAN40S ribosomal S27-like OS=Homo sapiens GN=RPS27L PE=1 SV=3	P	GO:0007062	sister chromatid cohesion
Q71UM5	RS27L_HUMAN40S ribosomal S27-like OS=Homo sapiens GN=RPS27L PE=1 SV=3	P	GO:0019083	viral transcription
Q71UM5	RS27L_HUMAN40S ribosomal S27-like OS=Homo sapiens GN=RPS27L PE=1 SV=3	P	GO:0031571	mitotic G1 DNA damage checkpoint
Q71UM5	RS27L_HUMAN40S ribosomal S27-like OS=Homo sapiens GN=RPS27L PE=1 SV=3	P	GO:0042771	intrinsic apoptotic signaling pathway in response to DNA damage by p53 class mediator
Q71UM5	RS27L_HUMAN40S ribosomal S27-like OS=Homo sapiens GN=RPS27L PE=1 SV=3	P	GO:0045948	positive regulation of translational initiation
Q71UM5	RS27L_HUMAN40S ribosomal S27-like OS=Homo sapiens GN=RPS27L PE=1 SV=3	P	GO:0006919	activation of cysteine-type endopeptidase activity involved in apoptotic process
Q71UM5	RS27L_HUMAN40S ribosomal S27-like OS=Homo sapiens GN=RPS27L PE=1 SV=3	C	GO:0008303	caspase complex
B4DUP5	EI2BD_HUMANTranslation initiation factor eIF-2B subunit delta OS=Homo sapiens GN=EIF2B4 PE=1 SV=2	C	GO:0005829	cytosol
B4DUP5	EI2BD_HUMANTranslation initiation factor eIF-2B subunit delta OS=Homo sapiens GN=EIF2B4 PE=1 SV=2	C	GO:0005851	eukaryotic translation initiation factor 2B complex
B4DUP5	EI2BD_HUMANTranslation initiation factor eIF-2B subunit delta OS=Homo sapiens GN=EIF2B4 PE=1 SV=2	F	GO:0003743	translation initiation factor activity
B4DUP5	EI2BD_HUMANTranslation initiation factor eIF-2B subunit delta OS=Homo sapiens GN=EIF2B4 PE=1 SV=2	F	GO:0005085	guanyl-nucleotide exchange factor activity
B4DUP5	EI2BD_HUMANTranslation initiation factor eIF-2B subunit delta OS=Homo sapiens GN=EIF2B4 PE=1 SV=2	F	GO:0005515	protein binding
B4DUP5	EI2BD_HUMANTranslation initiation factor eIF-2B subunit delta OS=Homo sapiens GN=EIF2B4 PE=1 SV=2	P	GO:0001541	ovarian follicle development
B4DUP5	EI2BD_HUMANTranslation initiation factor eIF-2B subunit delta OS=Homo sapiens GN=EIF2B4 PE=1 SV=2	P	GO:0006417	regulation of translation
B4DUP5	EI2BD_HUMANTranslation initiation factor eIF-2B subunit delta OS=Homo sapiens GN=EIF2B4 PE=1 SV=2	P	GO:0009408	response to heat
B4DUP5	EI2BD_HUMANTranslation initiation factor eIF-2B subunit delta OS=Homo sapiens GN=EIF2B4 PE=1 SV=2	P	GO:0014003	oligodendrocyte development
B4DUP5	EI2BD_HUMANTranslation initiation factor eIF-2B subunit delta OS=Homo sapiens GN=EIF2B4 PE=1 SV=2	P	GO:0042552	myelination
B4DUP5	EI2BD_HUMANTranslation initiation factor eIF-2B subunit delta OS=Homo sapiens GN=EIF2B4 PE=1 SV=2	P	GO:0051716	cellular response to stimulus
B4DUP5	EI2BD_HUMANTranslation initiation factor eIF-2B subunit delta OS=Homo sapiens GN=EIF2B4 PE=1 SV=2	C	GO:0005840	ribosome
B4DUP5	EI2BD_HUMANTranslation initiation factor eIF-2B subunit delta OS=Homo sapiens GN=EIF2B4 PE=1 SV=2	P	GO:0006446	regulation of translational initiation
B4DUP5	EI2BD_HUMANTranslation initiation factor eIF-2B subunit delta OS=Homo sapiens GN=EIF2B4 PE=1 SV=2	P	GO:0043087	regulation of GTPase activity
Q5HYD9	CYB5B_HUMANCytochrome b5 type B OS=Homo sapiens GN=CYB5B PE=1 SV=2	C	GO:0005739	mitochondrion
Q5HYD9	CYB5B_HUMANCytochrome b5 type B OS=Homo sapiens GN=CYB5B PE=1 SV=2	C	GO:0016020	membrane
Q5HYD9	CYB5B_HUMANCytochrome b5 type B OS=Homo sapiens GN=CYB5B PE=1 SV=2	C	GO:0044446	intracellular organelle part
Q5HYD9	CYB5B_HUMANCytochrome b5 type B OS=Homo sapiens GN=CYB5B PE=1 SV=2	F	GO:0016491	oxidoreductase activity
Q5HYD9	CYB5B_HUMANCytochrome b5 type B OS=Homo sapiens GN=CYB5B PE=1 SV=2	F	GO:0020037	heme binding
Q5HYD9	CYB5B_HUMANCytochrome b5 type B OS=Homo sapiens GN=CYB5B PE=1 SV=2	P	GO:0019752	carboxylic acid metabolic process
Q5HYD9	CYB5B_HUMANCytochrome b5 type B OS=Homo sapiens GN=CYB5B PE=1 SV=2	P	GO:0044255	cellular lipid metabolic process
P16402	H13_HUMANHistone OS=Homo sapiens GN=HIST1H1D PE=1 SV=2	C	GO:0000786	nucleosome
P16402	H13_HUMANHistone OS=Homo sapiens GN=HIST1H1D PE=1 SV=2	C	GO:0005719	nuclear euchromatin
P16402	H13_HUMANHistone OS=Homo sapiens GN=HIST1H1D PE=1 SV=2	C	GO:0005720	nuclear heterochromatin
P16402	H13_HUMANHistone OS=Homo sapiens GN=HIST1H1D PE=1 SV=2	C	GO:0070062	extracellular vesicular exosome
P16402	H13_HUMANHistone OS=Homo sapiens GN=HIST1H1D PE=1 SV=2	F	GO:0031490	chromatin DNA binding
P16402	H13_HUMANHistone OS=Homo sapiens GN=HIST1H1D PE=1 SV=2	F	GO:0042826	histone deacetylase binding
P16402	H13_HUMANHistone OS=Homo sapiens GN=HIST1H1D PE=1 SV=2	N	GO:0044822
P16402	H13_HUMANHistone OS=Homo sapiens GN=HIST1H1D PE=1 SV=2	P	GO:0000122	negative regulation of transcription from RNA polymerase II promoter
P16402	H13_HUMANHistone OS=Homo sapiens GN=HIST1H1D PE=1 SV=2	P	GO:0006334	nucleosome assembly
P16402	H13_HUMANHistone OS=Homo sapiens GN=HIST1H1D PE=1 SV=2	P	GO:0030307	positive regulation of cell growth
P16402	H13_HUMANHistone OS=Homo sapiens GN=HIST1H1D PE=1 SV=2	P	GO:0050821	protein stabilization
P16402	H13_HUMANHistone OS=Homo sapiens GN=HIST1H1D PE=1 SV=2	P	GO:0051574	positive regulation of histone H3-K9 methylation
P16402	H13_HUMANHistone OS=Homo sapiens GN=HIST1H1D PE=1 SV=2	P	GO:0071169	establishment of protein localization to chromatin
P16402	H13_HUMANHistone OS=Homo sapiens GN=HIST1H1D PE=1 SV=2	C	GO:0000118	histone deacetylase complex
M0R0F0	RS5_HUMAN40S ribosomal S5 OS=Homo sapiens GN=RPS5 PE=1 SV=4	C	GO:0005654	nucleoplasm
M0R0F0	RS5_HUMAN40S ribosomal S5 OS=Homo sapiens GN=RPS5 PE=1 SV=4	C	GO:0005925	focal adhesion
M0R0F0	RS5_HUMAN40S ribosomal S5 OS=Homo sapiens GN=RPS5 PE=1 SV=4	C	GO:0016020	membrane
M0R0F0	RS5_HUMAN40S ribosomal S5 OS=Homo sapiens GN=RPS5 PE=1 SV=4	C	GO:0022627	cytosolic small ribosomal subunit
M0R0F0	RS5_HUMAN40S ribosomal S5 OS=Homo sapiens GN=RPS5 PE=1 SV=4	C	GO:0070062	extracellular vesicular exosome
M0R0F0	RS5_HUMAN40S ribosomal S5 OS=Homo sapiens GN=RPS5 PE=1 SV=4	F	GO:0003729	mRNA binding
M0R0F0	RS5_HUMAN40S ribosomal S5 OS=Homo sapiens GN=RPS5 PE=1 SV=4	F	GO:0003735	structural constituent of ribosome
M0R0F0	RS5_HUMAN40S ribosomal S5 OS=Homo sapiens GN=RPS5 PE=1 SV=4	F	GO:0005515	protein binding
M0R0F0	RS5_HUMAN40S ribosomal S5 OS=Homo sapiens GN=RPS5 PE=1 SV=4	P	GO:0000184	nuclear-transcribed mRNA catabolic process, nonsense-mediated decay
M0R0F0	RS5_HUMAN40S ribosomal S5 OS=Homo sapiens GN=RPS5 PE=1 SV=4	P	GO:0006364	rRNA processing
M0R0F0	RS5_HUMAN40S ribosomal S5 OS=Homo sapiens GN=RPS5 PE=1 SV=4	P	GO:0006413	translational initiation
M0R0F0	RS5_HUMAN40S ribosomal S5 OS=Homo sapiens GN=RPS5 PE=1 SV=4	P	GO:0006450	regulation of translational fidelity
M0R0F0	RS5_HUMAN40S ribosomal S5 OS=Homo sapiens GN=RPS5 PE=1 SV=4	P	GO:0006614	SRP-dependent cotranslational protein targeting to membrane
M0R0F0	RS5_HUMAN40S ribosomal S5 OS=Homo sapiens GN=RPS5 PE=1 SV=4	P	GO:0019083	viral transcription
Q9Y3U8	RL36_HUMAN60S ribosomal L36 OS=Homo sapiens GN=RPL36 PE=1 SV=3	C	GO:0005730	nucleolus
Q9Y3U8	RL36_HUMAN60S ribosomal L36 OS=Homo sapiens GN=RPL36 PE=1 SV=3	C	GO:0016020	membrane
Q9Y3U8	RL36_HUMAN60S ribosomal L36 OS=Homo sapiens GN=RPL36 PE=1 SV=3	C	GO:0022625	cytosolic large ribosomal subunit
Q9Y3U8	RL36_HUMAN60S ribosomal L36 OS=Homo sapiens GN=RPL36 PE=1 SV=3	F	GO:0003735	structural constituent of ribosome
Q9Y3U8	RL36_HUMAN60S ribosomal L36 OS=Homo sapiens GN=RPL36 PE=1 SV=3	N	GO:0044822
Q9Y3U8	RL36_HUMAN60S ribosomal L36 OS=Homo sapiens GN=RPL36 PE=1 SV=3	P	GO:0000184	nuclear-transcribed mRNA catabolic process, nonsense-mediated decay
Q9Y3U8	RL36_HUMAN60S ribosomal L36 OS=Homo sapiens GN=RPL36 PE=1 SV=3	P	GO:0006364	rRNA processing
Q9Y3U8	RL36_HUMAN60S ribosomal L36 OS=Homo sapiens GN=RPL36 PE=1 SV=3	P	GO:0006413	translational initiation
Q9Y3U8	RL36_HUMAN60S ribosomal L36 OS=Homo sapiens GN=RPL36 PE=1 SV=3	P	GO:0006614	SRP-dependent cotranslational protein targeting to membrane
Q9Y3U8	RL36_HUMAN60S ribosomal L36 OS=Homo sapiens GN=RPL36 PE=1 SV=3	P	GO:0019083	viral transcription
P11388	TOP2A_HUMANDNA topoisomerase 2-alpha OS=Homo sapiens GN=TOP2A PE=1 SV=3	C	GO:0000228	nuclear chromosome
P11388	TOP2A_HUMANDNA topoisomerase 2-alpha OS=Homo sapiens GN=TOP2A PE=1 SV=3	C	GO:0005730	nucleolus
P11388	TOP2A_HUMANDNA topoisomerase 2-alpha OS=Homo sapiens GN=TOP2A PE=1 SV=3	C	GO:0005814	centriole
P11388	TOP2A_HUMANDNA topoisomerase 2-alpha OS=Homo sapiens GN=TOP2A PE=1 SV=3	C	GO:0009330	DNA topoisomerase complex (ATP-hydrolyzing)
P11388	TOP2A_HUMANDNA topoisomerase 2-alpha OS=Homo sapiens GN=TOP2A PE=1 SV=3	F	GO:0000287	magnesium ion binding
P11388	TOP2A_HUMANDNA topoisomerase 2-alpha OS=Homo sapiens GN=TOP2A PE=1 SV=3	F	GO:0003682	chromatin binding
P11388	TOP2A_HUMANDNA topoisomerase 2-alpha OS=Homo sapiens GN=TOP2A PE=1 SV=3	F	GO:0003918	DNA topoisomerase type II (ATP-hydrolyzing) activity
P11388	TOP2A_HUMANDNA topoisomerase 2-alpha OS=Homo sapiens GN=TOP2A PE=1 SV=3	F	GO:0005080	protein kinase C binding
P11388	TOP2A_HUMANDNA topoisomerase 2-alpha OS=Homo sapiens GN=TOP2A PE=1 SV=3	F	GO:0005524	ATP binding
P11388	TOP2A_HUMANDNA topoisomerase 2-alpha OS=Homo sapiens GN=TOP2A PE=1 SV=3	F	GO:0008022	protein C-terminus binding
P11388	TOP2A_HUMANDNA topoisomerase 2-alpha OS=Homo sapiens GN=TOP2A PE=1 SV=3	F	GO:0008144	drug binding
P11388	TOP2A_HUMANDNA topoisomerase 2-alpha OS=Homo sapiens GN=TOP2A PE=1 SV=3	F	GO:0008301	DNA binding, bending
P11388	TOP2A_HUMANDNA topoisomerase 2-alpha OS=Homo sapiens GN=TOP2A PE=1 SV=3	F	GO:0042803	protein homodimerization activity
P11388	TOP2A_HUMANDNA topoisomerase 2-alpha OS=Homo sapiens GN=TOP2A PE=1 SV=3	F	GO:0042826	histone deacetylase binding
P11388	TOP2A_HUMANDNA topoisomerase 2-alpha OS=Homo sapiens GN=TOP2A PE=1 SV=3	F	GO:0043130	ubiquitin binding
P11388	TOP2A_HUMANDNA topoisomerase 2-alpha OS=Homo sapiens GN=TOP2A PE=1 SV=3	N	GO:0044822
P11388	TOP2A_HUMANDNA topoisomerase 2-alpha OS=Homo sapiens GN=TOP2A PE=1 SV=3	F	GO:0046982	protein heterodimerization activity
P11388	TOP2A_HUMANDNA topoisomerase 2-alpha OS=Homo sapiens GN=TOP2A PE=1 SV=3	P	GO:0006265	DNA topological change
P11388	TOP2A_HUMANDNA topoisomerase 2-alpha OS=Homo sapiens GN=TOP2A PE=1 SV=3	P	GO:0006266	DNA ligation
P11388	TOP2A_HUMANDNA topoisomerase 2-alpha OS=Homo sapiens GN=TOP2A PE=1 SV=3	P	GO:0006310	DNA recombination
P11388	TOP2A_HUMANDNA topoisomerase 2-alpha OS=Homo sapiens GN=TOP2A PE=1 SV=3	P	GO:0006974	response to DNA damage stimulus
P11388	TOP2A_HUMANDNA topoisomerase 2-alpha OS=Homo sapiens GN=TOP2A PE=1 SV=3	P	GO:0016925	protein sumoylation
P11388	TOP2A_HUMANDNA topoisomerase 2-alpha OS=Homo sapiens GN=TOP2A PE=1 SV=3	P	GO:0030263	apoptotic chromosome condensation
P11388	TOP2A_HUMANDNA topoisomerase 2-alpha OS=Homo sapiens GN=TOP2A PE=1 SV=3	P	GO:0043065	positive regulation of apoptotic process
P11388	TOP2A_HUMANDNA topoisomerase 2-alpha OS=Homo sapiens GN=TOP2A PE=1 SV=3	P	GO:0045870	positive regulation of retroviral genome replication
P11388	TOP2A_HUMANDNA topoisomerase 2-alpha OS=Homo sapiens GN=TOP2A PE=1 SV=3	P	GO:0048731	system development
P11388	TOP2A_HUMANDNA topoisomerase 2-alpha OS=Homo sapiens GN=TOP2A PE=1 SV=3	N	GO:0098813
P11388	TOP2A_HUMANDNA topoisomerase 2-alpha OS=Homo sapiens GN=TOP2A PE=1 SV=3	C	GO:0000785	chromatin
P11388	TOP2A_HUMANDNA topoisomerase 2-alpha OS=Homo sapiens GN=TOP2A PE=1 SV=3	C	GO:0000118	histone deacetylase complex
Q16678	CP1B1_HUMANCytochrome P450 1B1 OS=Homo sapiens GN=CYP1B1 PE=1 SV=2	C	GO:0005789	endoplasmic reticulum membrane
Q16678	CP1B1_HUMANCytochrome P450 1B1 OS=Homo sapiens GN=CYP1B1 PE=1 SV=2	F	GO:0005506	iron ion binding
Q16678	CP1B1_HUMANCytochrome P450 1B1 OS=Homo sapiens GN=CYP1B1 PE=1 SV=2	F	GO:0016712	oxidoreductase activity, acting on paired donors, with incorporation or reduction of molecular oxygen, reduced flavin or flavoprotein as one donor, and incorporation of one atom of oxygen
Q16678	CP1B1_HUMANCytochrome P450 1B1 OS=Homo sapiens GN=CYP1B1 PE=1 SV=2	F	GO:0019825	oxygen binding
Q16678	CP1B1_HUMANCytochrome P450 1B1 OS=Homo sapiens GN=CYP1B1 PE=1 SV=2	F	GO:0020037	heme binding
Q16678	CP1B1_HUMANCytochrome P450 1B1 OS=Homo sapiens GN=CYP1B1 PE=1 SV=2	P	GO:0006725	cellular aromatic compound metabolic process
Q16678	CP1B1_HUMANCytochrome P450 1B1 OS=Homo sapiens GN=CYP1B1 PE=1 SV=2	P	GO:0006805	xenobiotic metabolic process
Q16678	CP1B1_HUMANCytochrome P450 1B1 OS=Homo sapiens GN=CYP1B1 PE=1 SV=2	P	GO:0007155	cell adhesion
Q16678	CP1B1_HUMANCytochrome P450 1B1 OS=Homo sapiens GN=CYP1B1 PE=1 SV=2	P	GO:0007601	visual perception
Q16678	CP1B1_HUMANCytochrome P450 1B1 OS=Homo sapiens GN=CYP1B1 PE=1 SV=2	P	GO:0008210	estrogen metabolic process
Q16678	CP1B1_HUMANCytochrome P450 1B1 OS=Homo sapiens GN=CYP1B1 PE=1 SV=2	P	GO:0009888	tissue development
Q16678	CP1B1_HUMANCytochrome P450 1B1 OS=Homo sapiens GN=CYP1B1 PE=1 SV=2	P	GO:0010035	response to inorganic substance
Q16678	CP1B1_HUMANCytochrome P450 1B1 OS=Homo sapiens GN=CYP1B1 PE=1 SV=2	P	GO:0010468	regulation of gene expression
Q16678	CP1B1_HUMANCytochrome P450 1B1 OS=Homo sapiens GN=CYP1B1 PE=1 SV=2	P	GO:0016042	lipid catabolic process
Q16678	CP1B1_HUMANCytochrome P450 1B1 OS=Homo sapiens GN=CYP1B1 PE=1 SV=2	P	GO:0016125	sterol metabolic process
Q16678	CP1B1_HUMANCytochrome P450 1B1 OS=Homo sapiens GN=CYP1B1 PE=1 SV=2	P	GO:0019373	epoxygenase P450 pathway
Q16678	CP1B1_HUMANCytochrome P450 1B1 OS=Homo sapiens GN=CYP1B1 PE=1 SV=2	P	GO:0019748	secondary metabolic process
Q16678	CP1B1_HUMANCytochrome P450 1B1 OS=Homo sapiens GN=CYP1B1 PE=1 SV=2	P	GO:0031323	regulation of cellular metabolic process
Q16678	CP1B1_HUMANCytochrome P450 1B1 OS=Homo sapiens GN=CYP1B1 PE=1 SV=2	P	GO:0034599	cellular response to oxidative stress
Q16678	CP1B1_HUMANCytochrome P450 1B1 OS=Homo sapiens GN=CYP1B1 PE=1 SV=2	P	GO:0034641	cellular nitrogen compound metabolic process
Q16678	CP1B1_HUMANCytochrome P450 1B1 OS=Homo sapiens GN=CYP1B1 PE=1 SV=2	P	GO:0042572	retinol metabolic process
Q16678	CP1B1_HUMANCytochrome P450 1B1 OS=Homo sapiens GN=CYP1B1 PE=1 SV=2	P	GO:0042574	retinal metabolic process
Q16678	CP1B1_HUMANCytochrome P450 1B1 OS=Homo sapiens GN=CYP1B1 PE=1 SV=2	P	GO:0044248	cellular catabolic process
Q16678	CP1B1_HUMANCytochrome P450 1B1 OS=Homo sapiens GN=CYP1B1 PE=1 SV=2	P	GO:0044249	cellular biosynthetic process
Q16678	CP1B1_HUMANCytochrome P450 1B1 OS=Homo sapiens GN=CYP1B1 PE=1 SV=2	P	GO:0048514	blood vessel morphogenesis
Q16678	CP1B1_HUMANCytochrome P450 1B1 OS=Homo sapiens GN=CYP1B1 PE=1 SV=2	P	GO:0048522	positive regulation of cellular process
Q16678	CP1B1_HUMANCytochrome P450 1B1 OS=Homo sapiens GN=CYP1B1 PE=1 SV=2	P	GO:0048523	negative regulation of cellular process
Q16678	CP1B1_HUMANCytochrome P450 1B1 OS=Homo sapiens GN=CYP1B1 PE=1 SV=2	P	GO:0051240	positive regulation of multicellular organismal process
Q16678	CP1B1_HUMANCytochrome P450 1B1 OS=Homo sapiens GN=CYP1B1 PE=1 SV=2	P	GO:0055114	oxidation-reduction process
Q16678	CP1B1_HUMANCytochrome P450 1B1 OS=Homo sapiens GN=CYP1B1 PE=1 SV=2	P	GO:0061298	retina vasculature development in camera-type eye
Q16678	CP1B1_HUMANCytochrome P450 1B1 OS=Homo sapiens GN=CYP1B1 PE=1 SV=2	P	GO:0071407	cellular response to organic cyclic compound
Q16678	CP1B1_HUMANCytochrome P450 1B1 OS=Homo sapiens GN=CYP1B1 PE=1 SV=2	P	GO:0097267	omega-hydroxylase P450 pathway
Q16678	CP1B1_HUMANCytochrome P450 1B1 OS=Homo sapiens GN=CYP1B1 PE=1 SV=2	P	GO:1901700	response to oxygen-containing compound
Q16678	CP1B1_HUMANCytochrome P450 1B1 OS=Homo sapiens GN=CYP1B1 PE=1 SV=2	N	GO:1903409
Q16678	CP1B1_HUMANCytochrome P450 1B1 OS=Homo sapiens GN=CYP1B1 PE=1 SV=2	P	GO:0006118	electron transport
P50914	RL14_HUMAN60S ribosomal L14 OS=Homo sapiens GN=RPL14 PE=1 SV=4	C	GO:0016020	membrane
P50914	RL14_HUMAN60S ribosomal L14 OS=Homo sapiens GN=RPL14 PE=1 SV=4	C	GO:0022625	cytosolic large ribosomal subunit
P50914	RL14_HUMAN60S ribosomal L14 OS=Homo sapiens GN=RPL14 PE=1 SV=4	C	GO:0070062	extracellular vesicular exosome
P50914	RL14_HUMAN60S ribosomal L14 OS=Homo sapiens GN=RPL14 PE=1 SV=4	F	GO:0003735	structural constituent of ribosome
P50914	RL14_HUMAN60S ribosomal L14 OS=Homo sapiens GN=RPL14 PE=1 SV=4	F	GO:0005515	protein binding
P50914	RL14_HUMAN60S ribosomal L14 OS=Homo sapiens GN=RPL14 PE=1 SV=4	N	GO:0044822
P50914	RL14_HUMAN60S ribosomal L14 OS=Homo sapiens GN=RPL14 PE=1 SV=4	P	GO:0000184	nuclear-transcribed mRNA catabolic process, nonsense-mediated decay
P50914	RL14_HUMAN60S ribosomal L14 OS=Homo sapiens GN=RPL14 PE=1 SV=4	P	GO:0006364	rRNA processing
P50914	RL14_HUMAN60S ribosomal L14 OS=Homo sapiens GN=RPL14 PE=1 SV=4	P	GO:0006413	translational initiation
P50914	RL14_HUMAN60S ribosomal L14 OS=Homo sapiens GN=RPL14 PE=1 SV=4	P	GO:0006614	SRP-dependent cotranslational protein targeting to membrane
P50914	RL14_HUMAN60S ribosomal L14 OS=Homo sapiens GN=RPL14 PE=1 SV=4	P	GO:0019083	viral transcription
P50914	RL14_HUMAN60S ribosomal L14 OS=Homo sapiens GN=RPL14 PE=1 SV=4	P	GO:0042273	ribosomal large subunit biogenesis
Q9BW34	EF1D_HUMANElongation factor 1-delta OS=Homo sapiens GN=EEF1D PE=1 SV=5	C	GO:0005730	nucleolus
Q9BW34	EF1D_HUMANElongation factor 1-delta OS=Homo sapiens GN=EEF1D PE=1 SV=5	C	GO:0005783	endoplasmic reticulum
Q9BW34	EF1D_HUMANElongation factor 1-delta OS=Homo sapiens GN=EEF1D PE=1 SV=5	C	GO:0005853	eukaryotic translation elongation factor 1 complex
Q9BW34	EF1D_HUMANElongation factor 1-delta OS=Homo sapiens GN=EEF1D PE=1 SV=5	F	GO:0003677	DNA binding
Q9BW34	EF1D_HUMANElongation factor 1-delta OS=Homo sapiens GN=EEF1D PE=1 SV=5	F	GO:0003746	translation elongation factor activity
Q9BW34	EF1D_HUMANElongation factor 1-delta OS=Homo sapiens GN=EEF1D PE=1 SV=5	F	GO:0004871	signal transducer activity
Q9BW34	EF1D_HUMANElongation factor 1-delta OS=Homo sapiens GN=EEF1D PE=1 SV=5	F	GO:0031072	heat shock protein binding
Q9BW34	EF1D_HUMANElongation factor 1-delta OS=Homo sapiens GN=EEF1D PE=1 SV=5	F	GO:0033613	activating transcription factor binding
Q9BW34	EF1D_HUMANElongation factor 1-delta OS=Homo sapiens GN=EEF1D PE=1 SV=5	P	GO:0009299	mRNA transcription
Q9BW34	EF1D_HUMANElongation factor 1-delta OS=Homo sapiens GN=EEF1D PE=1 SV=5	P	GO:0010941	regulation of cell death
Q9BW34	EF1D_HUMANElongation factor 1-delta OS=Homo sapiens GN=EEF1D PE=1 SV=5	P	GO:0043123	positive regulation of I-kappaB kinase/NF-kappaB cascade
Q9BW34	EF1D_HUMANElongation factor 1-delta OS=Homo sapiens GN=EEF1D PE=1 SV=5	P	GO:0071479	cellular response to ionizing radiation
Q9BW34	EF1D_HUMANElongation factor 1-delta OS=Homo sapiens GN=EEF1D PE=1 SV=5	C	GO:0005840	ribosome
Q9BW34	EF1D_HUMANElongation factor 1-delta OS=Homo sapiens GN=EEF1D PE=1 SV=5	P	GO:0006448	regulation of translational elongation
I3L2L5	F195B_HUMANMapk-regulated corepressor-interacting 1 OS=Homo sapiens GN=FAM195B PE=1 SV=1	C	GO:0005634	nucleus
I3L2L5	F195B_HUMANMapk-regulated corepressor-interacting 1 OS=Homo sapiens GN=FAM195B PE=1 SV=1	F	GO:0005515	protein binding
I3L2L5	F195B_HUMANMapk-regulated corepressor-interacting 1 OS=Homo sapiens GN=FAM195B PE=1 SV=1	P	GO:0010717	regulation of epithelial to mesenchymal transition
Q9Y3C1	NOP16_HUMANNucleolar 16 OS=Homo sapiens GN=NOP16 PE=1 SV=2	C	GO:0005730	nucleolus
Q9Y3C1	NOP16_HUMANNucleolar 16 OS=Homo sapiens GN=NOP16 PE=1 SV=2	N	GO:0044822
Q13895	BYST_HUMANBystin OS=Homo sapiens GN=BYSL PE=1 SV=3	C	GO:0005654	nucleoplasm
Q13895	BYST_HUMANBystin OS=Homo sapiens GN=BYSL PE=1 SV=3	C	GO:0005730	nucleolus
Q13895	BYST_HUMANBystin OS=Homo sapiens GN=BYSL PE=1 SV=3	C	GO:0005829	cytosol
Q13895	BYST_HUMANBystin OS=Homo sapiens GN=BYSL PE=1 SV=3	C	GO:0016020	membrane
Q13895	BYST_HUMANBystin OS=Homo sapiens GN=BYSL PE=1 SV=3	F	GO:0005515	protein binding
Q13895	BYST_HUMANBystin OS=Homo sapiens GN=BYSL PE=1 SV=3	N	GO:0044822
Q13895	BYST_HUMANBystin OS=Homo sapiens GN=BYSL PE=1 SV=3	P	GO:0006364	rRNA processing
Q13895	BYST_HUMANBystin OS=Homo sapiens GN=BYSL PE=1 SV=3	P	GO:0007155	cell adhesion
Q13895	BYST_HUMANBystin OS=Homo sapiens GN=BYSL PE=1 SV=3	P	GO:0007275	multicellular organismal development
Q13895	BYST_HUMANBystin OS=Homo sapiens GN=BYSL PE=1 SV=3	P	GO:0007565	female pregnancy
Q13895	BYST_HUMANBystin OS=Homo sapiens GN=BYSL PE=1 SV=3	P	GO:0071310	cellular response to organic substance
B2R4U3	UBE2C_HUMANUbiquitin-conjugating enzyme E2 C OS=Homo sapiens GN=UBE2C PE=1 SV=1	C	GO:0005654	nucleoplasm
B2R4U3	UBE2C_HUMANUbiquitin-conjugating enzyme E2 C OS=Homo sapiens GN=UBE2C PE=1 SV=1	C	GO:0005680	anaphase-promoting complex
B2R4U3	UBE2C_HUMANUbiquitin-conjugating enzyme E2 C OS=Homo sapiens GN=UBE2C PE=1 SV=1	C	GO:0005829	cytosol
B2R4U3	UBE2C_HUMANUbiquitin-conjugating enzyme E2 C OS=Homo sapiens GN=UBE2C PE=1 SV=1	C	GO:0043232	intracellular non-membrane-bounded organelle
B2R4U3	UBE2C_HUMANUbiquitin-conjugating enzyme E2 C OS=Homo sapiens GN=UBE2C PE=1 SV=1	F	GO:0005515	protein binding
B2R4U3	UBE2C_HUMANUbiquitin-conjugating enzyme E2 C OS=Homo sapiens GN=UBE2C PE=1 SV=1	N	GO:0061631
B2R4U3	UBE2C_HUMANUbiquitin-conjugating enzyme E2 C OS=Homo sapiens GN=UBE2C PE=1 SV=1	P	GO:0000090	mitotic anaphase
B2R4U3	UBE2C_HUMANUbiquitin-conjugating enzyme E2 C OS=Homo sapiens GN=UBE2C PE=1 SV=1	P	GO:0006281	DNA repair
B2R4U3	UBE2C_HUMANUbiquitin-conjugating enzyme E2 C OS=Homo sapiens GN=UBE2C PE=1 SV=1	P	GO:0007165	signal transduction
B2R4U3	UBE2C_HUMANUbiquitin-conjugating enzyme E2 C OS=Homo sapiens GN=UBE2C PE=1 SV=1	P	GO:0010994	free ubiquitin chain polymerization
B2R4U3	UBE2C_HUMANUbiquitin-conjugating enzyme E2 C OS=Homo sapiens GN=UBE2C PE=1 SV=1	P	GO:0019219	regulation of nucleobase-containing compound metabolic process
B2R4U3	UBE2C_HUMANUbiquitin-conjugating enzyme E2 C OS=Homo sapiens GN=UBE2C PE=1 SV=1	P	GO:0031145	anaphase-promoting complex-dependent proteasomal ubiquitin-dependent protein catabolic process
B2R4U3	UBE2C_HUMANUbiquitin-conjugating enzyme E2 C OS=Homo sapiens GN=UBE2C PE=1 SV=1	P	GO:0031536	positive regulation of exit from mitosis
B2R4U3	UBE2C_HUMANUbiquitin-conjugating enzyme E2 C OS=Homo sapiens GN=UBE2C PE=1 SV=1	P	GO:0048583	regulation of response to stimulus
B2R4U3	UBE2C_HUMANUbiquitin-conjugating enzyme E2 C OS=Homo sapiens GN=UBE2C PE=1 SV=1	P	GO:0051436	negative regulation of ubiquitin-protein ligase activity involved in mitotic cell cycle
B2R4U3	UBE2C_HUMANUbiquitin-conjugating enzyme E2 C OS=Homo sapiens GN=UBE2C PE=1 SV=1	P	GO:0051437	positive regulation of ubiquitin-protein ligase activity involved in mitotic cell cycle
B2R4U3	UBE2C_HUMANUbiquitin-conjugating enzyme E2 C OS=Homo sapiens GN=UBE2C PE=1 SV=1	P	GO:0070936	protein K48-linked ubiquitination
B2R4U3	UBE2C_HUMANUbiquitin-conjugating enzyme E2 C OS=Homo sapiens GN=UBE2C PE=1 SV=1	P	GO:0070979	protein K11-linked ubiquitination
P62081	RS7_HUMAN40S ribosomal S7 OS=Homo sapiens GN=RPS7 PE=1 SV=1	C	GO:0005654	nucleoplasm
P62081	RS7_HUMAN40S ribosomal S7 OS=Homo sapiens GN=RPS7 PE=1 SV=1	C	GO:0005730	nucleolus
P62081	RS7_HUMAN40S ribosomal S7 OS=Homo sapiens GN=RPS7 PE=1 SV=1	C	GO:0005925	focal adhesion
P62081	RS7_HUMAN40S ribosomal S7 OS=Homo sapiens GN=RPS7 PE=1 SV=1	C	GO:0016020	membrane
P62081	RS7_HUMAN40S ribosomal S7 OS=Homo sapiens GN=RPS7 PE=1 SV=1	C	GO:0022627	cytosolic small ribosomal subunit
P62081	RS7_HUMAN40S ribosomal S7 OS=Homo sapiens GN=RPS7 PE=1 SV=1	C	GO:0030684	preribosome
P62081	RS7_HUMAN40S ribosomal S7 OS=Homo sapiens GN=RPS7 PE=1 SV=1	C	GO:0070062	extracellular vesicular exosome
P62081	RS7_HUMAN40S ribosomal S7 OS=Homo sapiens GN=RPS7 PE=1 SV=1	F	GO:0003735	structural constituent of ribosome
P62081	RS7_HUMAN40S ribosomal S7 OS=Homo sapiens GN=RPS7 PE=1 SV=1	F	GO:0005515	protein binding
P62081	RS7_HUMAN40S ribosomal S7 OS=Homo sapiens GN=RPS7 PE=1 SV=1	N	GO:0044822
P62081	RS7_HUMAN40S ribosomal S7 OS=Homo sapiens GN=RPS7 PE=1 SV=1	P	GO:0000184	nuclear-transcribed mRNA catabolic process, nonsense-mediated decay
P62081	RS7_HUMAN40S ribosomal S7 OS=Homo sapiens GN=RPS7 PE=1 SV=1	P	GO:0006364	rRNA processing
P62081	RS7_HUMAN40S ribosomal S7 OS=Homo sapiens GN=RPS7 PE=1 SV=1	P	GO:0006413	translational initiation
P62081	RS7_HUMAN40S ribosomal S7 OS=Homo sapiens GN=RPS7 PE=1 SV=1	P	GO:0006614	SRP-dependent cotranslational protein targeting to membrane
P62081	RS7_HUMAN40S ribosomal S7 OS=Homo sapiens GN=RPS7 PE=1 SV=1	P	GO:0019083	viral transcription
P62081	RS7_HUMAN40S ribosomal S7 OS=Homo sapiens GN=RPS7 PE=1 SV=1	P	GO:0042274	ribosomal small subunit biogenesis
Q8TDN6	BRX1_HUMANRibosome biogenesis BRX1 homolog OS=Homo sapiens GN=BRIX1 PE=1 SV=2	C	GO:0005730	nucleolus
Q8TDN6	BRX1_HUMANRibosome biogenesis BRX1 homolog OS=Homo sapiens GN=BRIX1 PE=1 SV=2	N	GO:0044822
Q8TDN6	BRX1_HUMANRibosome biogenesis BRX1 homolog OS=Homo sapiens GN=BRIX1 PE=1 SV=2	P	GO:0042254	ribosome biogenesis
Q6IAM0	EIF3G_HUMANEukaryotic translation initiation factor 3 subunit G OS=Homo sapiens GN=EIF3G PE=1 SV=2	C	GO:0005829	cytosol
Q6IAM0	EIF3G_HUMANEukaryotic translation initiation factor 3 subunit G OS=Homo sapiens GN=EIF3G PE=1 SV=2	C	GO:0005852	eukaryotic translation initiation factor 3 complex
Q6IAM0	EIF3G_HUMANEukaryotic translation initiation factor 3 subunit G OS=Homo sapiens GN=EIF3G PE=1 SV=2	C	GO:0044428	nuclear part
Q6IAM0	EIF3G_HUMANEukaryotic translation initiation factor 3 subunit G OS=Homo sapiens GN=EIF3G PE=1 SV=2	F	GO:0000166	nucleotide binding
Q6IAM0	EIF3G_HUMANEukaryotic translation initiation factor 3 subunit G OS=Homo sapiens GN=EIF3G PE=1 SV=2	F	GO:0003743	translation initiation factor activity
Q6IAM0	EIF3G_HUMANEukaryotic translation initiation factor 3 subunit G OS=Homo sapiens GN=EIF3G PE=1 SV=2	F	GO:0005515	protein binding
Q6IAM0	EIF3G_HUMANEukaryotic translation initiation factor 3 subunit G OS=Homo sapiens GN=EIF3G PE=1 SV=2	N	GO:0044822
Q6IAM0	EIF3G_HUMANEukaryotic translation initiation factor 3 subunit G OS=Homo sapiens GN=EIF3G PE=1 SV=2	P	GO:0010608	posttranscriptional regulation of gene expression
Q6IAM0	EIF3G_HUMANEukaryotic translation initiation factor 3 subunit G OS=Homo sapiens GN=EIF3G PE=1 SV=2	P	GO:0044699	single-organism process
Q6IAM0	EIF3G_HUMANEukaryotic translation initiation factor 3 subunit G OS=Homo sapiens GN=EIF3G PE=1 SV=2	P	GO:0075525	viral translational termination-reinitiation
Q6IAM0	EIF3G_HUMANEukaryotic translation initiation factor 3 subunit G OS=Homo sapiens GN=EIF3G PE=1 SV=2	P	GO:2000112	regulation of cellular macromolecule biosynthetic process
Q6IAM0	EIF3G_HUMANEukaryotic translation initiation factor 3 subunit G OS=Homo sapiens GN=EIF3G PE=1 SV=2	C	GO:0005840	ribosome
Q6IAM0	EIF3G_HUMANEukaryotic translation initiation factor 3 subunit G OS=Homo sapiens GN=EIF3G PE=1 SV=2	P	GO:0006446	regulation of translational initiation
Q9BVP2	GNL3_HUMANGuanine nucleotide-binding -like 3 OS=Homo sapiens GN=GNL3 PE=1 SV=2	C	GO:0005615	extracellular space
Q9BVP2	GNL3_HUMANGuanine nucleotide-binding -like 3 OS=Homo sapiens GN=GNL3 PE=1 SV=2	C	GO:0005730	nucleolus
Q9BVP2	GNL3_HUMANGuanine nucleotide-binding -like 3 OS=Homo sapiens GN=GNL3 PE=1 SV=2	C	GO:0016020	membrane
Q9BVP2	GNL3_HUMANGuanine nucleotide-binding -like 3 OS=Homo sapiens GN=GNL3 PE=1 SV=2	C	GO:0044444	cytoplasmic part
Q9BVP2	GNL3_HUMANGuanine nucleotide-binding -like 3 OS=Homo sapiens GN=GNL3 PE=1 SV=2	F	GO:0005515	protein binding
Q9BVP2	GNL3_HUMANGuanine nucleotide-binding -like 3 OS=Homo sapiens GN=GNL3 PE=1 SV=2	F	GO:0005525	GTP binding
Q9BVP2	GNL3_HUMANGuanine nucleotide-binding -like 3 OS=Homo sapiens GN=GNL3 PE=1 SV=2	F	GO:0016787	hydrolase activity
Q9BVP2	GNL3_HUMANGuanine nucleotide-binding -like 3 OS=Homo sapiens GN=GNL3 PE=1 SV=2	N	GO:0044822
Q9BVP2	GNL3_HUMANGuanine nucleotide-binding -like 3 OS=Homo sapiens GN=GNL3 PE=1 SV=2	P	GO:0032206	positive regulation of telomere maintenance
Q9BVP2	GNL3_HUMANGuanine nucleotide-binding -like 3 OS=Homo sapiens GN=GNL3 PE=1 SV=2	P	GO:0033235	positive regulation of protein sumoylation
Q9BVP2	GNL3_HUMANGuanine nucleotide-binding -like 3 OS=Homo sapiens GN=GNL3 PE=1 SV=2	N	GO:1902895
Q9BVP2	GNL3_HUMANGuanine nucleotide-binding -like 3 OS=Homo sapiens GN=GNL3 PE=1 SV=2	N	GO:1904816
P46013	KI67_HUMANAntigen KI-67 OS=Homo sapiens GN=MKI67 PE=1 SV=2	C	GO:0005730	nucleolus
P46013	KI67_HUMANAntigen KI-67 OS=Homo sapiens GN=MKI67 PE=1 SV=2	C	GO:0016020	membrane
P46013	KI67_HUMANAntigen KI-67 OS=Homo sapiens GN=MKI67 PE=1 SV=2	F	GO:0008022	protein C-terminus binding
P46013	KI67_HUMANAntigen KI-67 OS=Homo sapiens GN=MKI67 PE=1 SV=2	N	GO:0044822
P46013	KI67_HUMANAntigen KI-67 OS=Homo sapiens GN=MKI67 PE=1 SV=2	P	GO:0008283	cell proliferation
P46013	KI67_HUMANAntigen KI-67 OS=Homo sapiens GN=MKI67 PE=1 SV=2	P	GO:0009987	cellular process
Q6DKI1	RL7L_HUMAN60S ribosomal L7-like 1 OS=Homo sapiens GN=RPL7L1 PE=1 SV=1	C	GO:0005829	cytosol
Q6DKI1	RL7L_HUMAN60S ribosomal L7-like 1 OS=Homo sapiens GN=RPL7L1 PE=1 SV=1	C	GO:0005840	ribosome
Q6DKI1	RL7L_HUMAN60S ribosomal L7-like 1 OS=Homo sapiens GN=RPL7L1 PE=1 SV=1	C	GO:0044446	intracellular organelle part
Q6DKI1	RL7L_HUMAN60S ribosomal L7-like 1 OS=Homo sapiens GN=RPL7L1 PE=1 SV=1	N	GO:0044822
Q6DKI1	RL7L_HUMAN60S ribosomal L7-like 1 OS=Homo sapiens GN=RPL7L1 PE=1 SV=1	P	GO:0006364	rRNA processing
Q6DKI1	RL7L_HUMAN60S ribosomal L7-like 1 OS=Homo sapiens GN=RPL7L1 PE=1 SV=1	P	GO:0006412	translation
Q6DKI1	RL7L_HUMAN60S ribosomal L7-like 1 OS=Homo sapiens GN=RPL7L1 PE=1 SV=1	P	GO:0042273	ribosomal large subunit biogenesis
Q8N4P8	NOG1_HUMANNucleolar GTP-binding 1 OS=Homo sapiens GN=GTPBP4 PE=1 SV=3	C	GO:0005730	nucleolus
Q8N4P8	NOG1_HUMANNucleolar GTP-binding 1 OS=Homo sapiens GN=GTPBP4 PE=1 SV=3	C	GO:0005794	Golgi apparatus
Q8N4P8	NOG1_HUMANNucleolar GTP-binding 1 OS=Homo sapiens GN=GTPBP4 PE=1 SV=3	C	GO:0031965	nuclear membrane
Q8N4P8	NOG1_HUMANNucleolar GTP-binding 1 OS=Homo sapiens GN=GTPBP4 PE=1 SV=3	C	GO:0048471	perinuclear region of cytoplasm
Q8N4P8	NOG1_HUMANNucleolar GTP-binding 1 OS=Homo sapiens GN=GTPBP4 PE=1 SV=3	F	GO:0003924	GTPase activity
Q8N4P8	NOG1_HUMANNucleolar GTP-binding 1 OS=Homo sapiens GN=GTPBP4 PE=1 SV=3	F	GO:0005515	protein binding
Q8N4P8	NOG1_HUMANNucleolar GTP-binding 1 OS=Homo sapiens GN=GTPBP4 PE=1 SV=3	F	GO:0005525	GTP binding
Q8N4P8	NOG1_HUMANNucleolar GTP-binding 1 OS=Homo sapiens GN=GTPBP4 PE=1 SV=3	N	GO:0044822
Q8N4P8	NOG1_HUMANNucleolar GTP-binding 1 OS=Homo sapiens GN=GTPBP4 PE=1 SV=3	P	GO:0000079	regulation of cyclin-dependent protein serine/threonine kinase activity
Q8N4P8	NOG1_HUMANNucleolar GTP-binding 1 OS=Homo sapiens GN=GTPBP4 PE=1 SV=3	P	GO:0001649	osteoblast differentiation
Q8N4P8	NOG1_HUMANNucleolar GTP-binding 1 OS=Homo sapiens GN=GTPBP4 PE=1 SV=3	P	GO:0008156	negative regulation of DNA replication
Q8N4P8	NOG1_HUMANNucleolar GTP-binding 1 OS=Homo sapiens GN=GTPBP4 PE=1 SV=3	P	GO:0008285	negative regulation of cell proliferation
Q8N4P8	NOG1_HUMANNucleolar GTP-binding 1 OS=Homo sapiens GN=GTPBP4 PE=1 SV=3	P	GO:0022408	negative regulation of cell-cell adhesion
Q8N4P8	NOG1_HUMANNucleolar GTP-binding 1 OS=Homo sapiens GN=GTPBP4 PE=1 SV=3	P	GO:0030336	negative regulation of cell migration
Q8N4P8	NOG1_HUMANNucleolar GTP-binding 1 OS=Homo sapiens GN=GTPBP4 PE=1 SV=3	P	GO:0031397	negative regulation of protein ubiquitination
Q8N4P8	NOG1_HUMANNucleolar GTP-binding 1 OS=Homo sapiens GN=GTPBP4 PE=1 SV=3	P	GO:0033342	negative regulation of collagen binding
Q8N4P8	NOG1_HUMANNucleolar GTP-binding 1 OS=Homo sapiens GN=GTPBP4 PE=1 SV=3	P	GO:0050821	protein stabilization
Q9BVJ6	UT14A_HUMANU3 small nucleolar RNA-associated 14 homolog A OS=Homo sapiens GN=UTP14A PE=1 SV=1	C	GO:0005654	nucleoplasm
Q9BVJ6	UT14A_HUMANU3 small nucleolar RNA-associated 14 homolog A OS=Homo sapiens GN=UTP14A PE=1 SV=1	C	GO:0032040	small-subunit processome
Q9BVJ6	UT14A_HUMANU3 small nucleolar RNA-associated 14 homolog A OS=Homo sapiens GN=UTP14A PE=1 SV=1	F	GO:0005515	protein binding
Q9BVJ6	UT14A_HUMANU3 small nucleolar RNA-associated 14 homolog A OS=Homo sapiens GN=UTP14A PE=1 SV=1	N	GO:0044822
Q9BVJ6	UT14A_HUMANU3 small nucleolar RNA-associated 14 homolog A OS=Homo sapiens GN=UTP14A PE=1 SV=1	P	GO:0006364	rRNA processing
P60604	UB2G2_HUMANUbiquitin-conjugating enzyme E2 G2 OS=Homo sapiens GN=UBE2G2 PE=1 SV=1	C	GO:0005829	cytosol
P60604	UB2G2_HUMANUbiquitin-conjugating enzyme E2 G2 OS=Homo sapiens GN=UBE2G2 PE=1 SV=1	C	GO:0043231	intracellular membrane-bounded organelle
P60604	UB2G2_HUMANUbiquitin-conjugating enzyme E2 G2 OS=Homo sapiens GN=UBE2G2 PE=1 SV=1	C	GO:0044446	intracellular organelle part
P60604	UB2G2_HUMANUbiquitin-conjugating enzyme E2 G2 OS=Homo sapiens GN=UBE2G2 PE=1 SV=1	F	GO:0005515	protein binding
P60604	UB2G2_HUMANUbiquitin-conjugating enzyme E2 G2 OS=Homo sapiens GN=UBE2G2 PE=1 SV=1	N	GO:0061631
P60604	UB2G2_HUMANUbiquitin-conjugating enzyme E2 G2 OS=Homo sapiens GN=UBE2G2 PE=1 SV=1	P	GO:0016043	cellular component organization
P60604	UB2G2_HUMANUbiquitin-conjugating enzyme E2 G2 OS=Homo sapiens GN=UBE2G2 PE=1 SV=1	P	GO:0018279	protein N-linked glycosylation via asparagine
P60604	UB2G2_HUMANUbiquitin-conjugating enzyme E2 G2 OS=Homo sapiens GN=UBE2G2 PE=1 SV=1	P	GO:0030433	ER-associated protein catabolic process
P60604	UB2G2_HUMANUbiquitin-conjugating enzyme E2 G2 OS=Homo sapiens GN=UBE2G2 PE=1 SV=1	P	GO:0031323	regulation of cellular metabolic process
P60604	UB2G2_HUMANUbiquitin-conjugating enzyme E2 G2 OS=Homo sapiens GN=UBE2G2 PE=1 SV=1	P	GO:0035458	cellular response to interferon-beta
P60604	UB2G2_HUMANUbiquitin-conjugating enzyme E2 G2 OS=Homo sapiens GN=UBE2G2 PE=1 SV=1	P	GO:0048522	positive regulation of cellular process
P60604	UB2G2_HUMANUbiquitin-conjugating enzyme E2 G2 OS=Homo sapiens GN=UBE2G2 PE=1 SV=1	P	GO:0070936	protein K48-linked ubiquitination
P60604	UB2G2_HUMANUbiquitin-conjugating enzyme E2 G2 OS=Homo sapiens GN=UBE2G2 PE=1 SV=1	N	GO:1904153
A8K7A2	BOREA_HUMANBorealin OS=Homo sapiens GN=CDCA8 PE=1 SV=2	C	GO:0000775	chromosome, centromeric region
A8K7A2	BOREA_HUMANBorealin OS=Homo sapiens GN=CDCA8 PE=1 SV=2	C	GO:0005654	nucleoplasm
A8K7A2	BOREA_HUMANBorealin OS=Homo sapiens GN=CDCA8 PE=1 SV=2	C	GO:0005730	nucleolus
A8K7A2	BOREA_HUMANBorealin OS=Homo sapiens GN=CDCA8 PE=1 SV=2	C	GO:0005829	cytosol
A8K7A2	BOREA_HUMANBorealin OS=Homo sapiens GN=CDCA8 PE=1 SV=2	C	GO:0030496	midbody
A8K7A2	BOREA_HUMANBorealin OS=Homo sapiens GN=CDCA8 PE=1 SV=2	C	GO:0032133	chromosome passenger complex
A8K7A2	BOREA_HUMANBorealin OS=Homo sapiens GN=CDCA8 PE=1 SV=2	C	GO:0045171	intercellular bridge
A8K7A2	BOREA_HUMANBorealin OS=Homo sapiens GN=CDCA8 PE=1 SV=2	F	GO:0005515	protein binding
A8K7A2	BOREA_HUMANBorealin OS=Homo sapiens GN=CDCA8 PE=1 SV=2	P	GO:0000090	mitotic anaphase
A8K7A2	BOREA_HUMANBorealin OS=Homo sapiens GN=CDCA8 PE=1 SV=2	P	GO:0000236	mitotic prometaphase
A8K7A2	BOREA_HUMANBorealin OS=Homo sapiens GN=CDCA8 PE=1 SV=2	P	GO:0007062	sister chromatid cohesion
A8K7A2	BOREA_HUMANBorealin OS=Homo sapiens GN=CDCA8 PE=1 SV=2	P	GO:0007080	mitotic metaphase plate congression
A8K7A2	BOREA_HUMANBorealin OS=Homo sapiens GN=CDCA8 PE=1 SV=2	P	GO:0016925	protein sumoylation
A8K800	RPF2_HUMANRibosome production factor 2 homolog OS=Homo sapiens GN=RPF2 PE=1 SV=2	C	GO:0005730	nucleolus
A8K800	RPF2_HUMANRibosome production factor 2 homolog OS=Homo sapiens GN=RPF2 PE=1 SV=2	N	GO:0044822
P63218	GBG5_HUMANGuanine nucleotide-binding G(I) G(S) G(O) subunit gamma-5 OS=Homo sapiens GN=GNG5 PE=1 SV=3	C	GO:0005834	heterotrimeric G-protein complex
P63218	GBG5_HUMANGuanine nucleotide-binding G(I) G(S) G(O) subunit gamma-5 OS=Homo sapiens GN=GNG5 PE=1 SV=3	C	GO:0070062	extracellular vesicular exosome
P63218	GBG5_HUMANGuanine nucleotide-binding G(I) G(S) G(O) subunit gamma-5 OS=Homo sapiens GN=GNG5 PE=1 SV=3	F	GO:0004871	signal transducer activity
P63218	GBG5_HUMANGuanine nucleotide-binding G(I) G(S) G(O) subunit gamma-5 OS=Homo sapiens GN=GNG5 PE=1 SV=3	F	GO:0030165	PDZ domain binding
P63218	GBG5_HUMANGuanine nucleotide-binding G(I) G(S) G(O) subunit gamma-5 OS=Homo sapiens GN=GNG5 PE=1 SV=3	P	GO:0007186	G-protein coupled receptor signaling pathway
P63218	GBG5_HUMANGuanine nucleotide-binding G(I) G(S) G(O) subunit gamma-5 OS=Homo sapiens GN=GNG5 PE=1 SV=3	P	GO:0071377	cellular response to glucagon stimulus
Q15397	PUM3_HUMANPumilio homolog 3 OS=Homo sapiens GN=PUM3 PE=1 SV=3	C	GO:0005654	nucleoplasm
Q15397	PUM3_HUMANPumilio homolog 3 OS=Homo sapiens GN=PUM3 PE=1 SV=3	C	GO:0005730	nucleolus
Q15397	PUM3_HUMANPumilio homolog 3 OS=Homo sapiens GN=PUM3 PE=1 SV=3	C	GO:0005783	endoplasmic reticulum
Q15397	PUM3_HUMANPumilio homolog 3 OS=Homo sapiens GN=PUM3 PE=1 SV=3	F	GO:0003729	mRNA binding
Q15397	PUM3_HUMANPumilio homolog 3 OS=Homo sapiens GN=PUM3 PE=1 SV=3	F	GO:0005515	protein binding
Q15397	PUM3_HUMANPumilio homolog 3 OS=Homo sapiens GN=PUM3 PE=1 SV=3	P	GO:0006417	regulation of translation
Q15397	PUM3_HUMANPumilio homolog 3 OS=Homo sapiens GN=PUM3 PE=1 SV=3	P	GO:0010835	regulation of protein ADP-ribosylation
Q9NSI2	F207A_HUMAN FAM207A OS=Homo sapiens GN=FAM207A PE=1 SV=2	F	GO:0005515	protein binding
B2R823	PNO1_HUMANRNA-binding PNO1 OS=Homo sapiens GN=PNO1 PE=1 SV=1	C	GO:0005654	nucleoplasm
B2R823	PNO1_HUMANRNA-binding PNO1 OS=Homo sapiens GN=PNO1 PE=1 SV=1	C	GO:0005730	nucleolus
B2R823	PNO1_HUMANRNA-binding PNO1 OS=Homo sapiens GN=PNO1 PE=1 SV=1	C	GO:0005829	cytosol
B2R823	PNO1_HUMANRNA-binding PNO1 OS=Homo sapiens GN=PNO1 PE=1 SV=1	N	GO:0044822
B2R823	PNO1_HUMANRNA-binding PNO1 OS=Homo sapiens GN=PNO1 PE=1 SV=1	P	GO:0006364	rRNA processing
Q8IZZ8	ANT3_HUMANAntithrombin-III OS=Homo sapiens GN=SERPINC1 PE=1 SV=1	C	GO:0005622	intracellular
Q8IZZ8	ANT3_HUMANAntithrombin-III OS=Homo sapiens GN=SERPINC1 PE=1 SV=1	C	GO:0005886	plasma membrane
Q8IZZ8	ANT3_HUMANAntithrombin-III OS=Homo sapiens GN=SERPINC1 PE=1 SV=1	C	GO:0070062	extracellular vesicular exosome
Q8IZZ8	ANT3_HUMANAntithrombin-III OS=Homo sapiens GN=SERPINC1 PE=1 SV=1	C	GO:0072562	blood microparticle
Q8IZZ8	ANT3_HUMANAntithrombin-III OS=Homo sapiens GN=SERPINC1 PE=1 SV=1	F	GO:0002020	protease binding
Q8IZZ8	ANT3_HUMANAntithrombin-III OS=Homo sapiens GN=SERPINC1 PE=1 SV=1	F	GO:0004867	serine-type endopeptidase inhibitor activity
Q8IZZ8	ANT3_HUMANAntithrombin-III OS=Homo sapiens GN=SERPINC1 PE=1 SV=1	F	GO:0008201	heparin binding
Q8IZZ8	ANT3_HUMANAntithrombin-III OS=Homo sapiens GN=SERPINC1 PE=1 SV=1	P	GO:0030162	regulation of proteolysis
Q8IZZ8	ANT3_HUMANAntithrombin-III OS=Homo sapiens GN=SERPINC1 PE=1 SV=1	P	GO:0032268	regulation of cellular protein metabolic process
Q8IZZ8	ANT3_HUMANAntithrombin-III OS=Homo sapiens GN=SERPINC1 PE=1 SV=1	P	GO:0048519	negative regulation of biological process
Q8IZZ8	ANT3_HUMANAntithrombin-III OS=Homo sapiens GN=SERPINC1 PE=1 SV=1	P	GO:0050790	regulation of catalytic activity
Q8IZZ8	ANT3_HUMANAntithrombin-III OS=Homo sapiens GN=SERPINC1 PE=1 SV=1	P	GO:2000266	regulation of blood coagulation, intrinsic pathway
Q9NY93	DDX56_HUMANProbable ATP-dependent RNA helicase DDX56 OS=Homo sapiens GN=DDX56 PE=1 SV=1	C	GO:0005730	nucleolus
Q9NY93	DDX56_HUMANProbable ATP-dependent RNA helicase DDX56 OS=Homo sapiens GN=DDX56 PE=1 SV=1	C	GO:0016020	membrane
Q9NY93	DDX56_HUMANProbable ATP-dependent RNA helicase DDX56 OS=Homo sapiens GN=DDX56 PE=1 SV=1	F	GO:0004004	ATP-dependent RNA helicase activity
Q9NY93	DDX56_HUMANProbable ATP-dependent RNA helicase DDX56 OS=Homo sapiens GN=DDX56 PE=1 SV=1	F	GO:0005524	ATP binding
Q9NY93	DDX56_HUMANProbable ATP-dependent RNA helicase DDX56 OS=Homo sapiens GN=DDX56 PE=1 SV=1	N	GO:0044822
Q9NY93	DDX56_HUMANProbable ATP-dependent RNA helicase DDX56 OS=Homo sapiens GN=DDX56 PE=1 SV=1	P	GO:0006396	RNA processing
Q9NY93	DDX56_HUMANProbable ATP-dependent RNA helicase DDX56 OS=Homo sapiens GN=DDX56 PE=1 SV=1	P	GO:0042254	ribosome biogenesis
Q9NY93	DDX56_HUMANProbable ATP-dependent RNA helicase DDX56 OS=Homo sapiens GN=DDX56 PE=1 SV=1	P	GO:0044699	single-organism process
Q9NY93	DDX56_HUMANProbable ATP-dependent RNA helicase DDX56 OS=Homo sapiens GN=DDX56 PE=1 SV=1	P	GO:0050794	regulation of cellular process
Q99988	GDF15_HUMANGrowth differentiation factor 15 OS=Homo sapiens GN=GDF15 PE=2 SV=3	C	GO:0070062	extracellular vesicular exosome
Q99988	GDF15_HUMANGrowth differentiation factor 15 OS=Homo sapiens GN=GDF15 PE=2 SV=3	F	GO:0005125	cytokine activity
Q99988	GDF15_HUMANGrowth differentiation factor 15 OS=Homo sapiens GN=GDF15 PE=2 SV=3	F	GO:0008083	growth factor activity
Q99988	GDF15_HUMANGrowth differentiation factor 15 OS=Homo sapiens GN=GDF15 PE=2 SV=3	P	GO:0001934	positive regulation of protein phosphorylation
Q99988	GDF15_HUMANGrowth differentiation factor 15 OS=Homo sapiens GN=GDF15 PE=2 SV=3	P	GO:0007179	transforming growth factor beta receptor signaling pathway
Q99988	GDF15_HUMANGrowth differentiation factor 15 OS=Homo sapiens GN=GDF15 PE=2 SV=3	P	GO:0007267	cell-cell signaling
Q99988	GDF15_HUMANGrowth differentiation factor 15 OS=Homo sapiens GN=GDF15 PE=2 SV=3	P	GO:0009888	tissue development
Q99988	GDF15_HUMANGrowth differentiation factor 15 OS=Homo sapiens GN=GDF15 PE=2 SV=3	P	GO:0010468	regulation of gene expression
Q99988	GDF15_HUMANGrowth differentiation factor 15 OS=Homo sapiens GN=GDF15 PE=2 SV=3	P	GO:0019219	regulation of nucleobase-containing compound metabolic process
Q99988	GDF15_HUMANGrowth differentiation factor 15 OS=Homo sapiens GN=GDF15 PE=2 SV=3	P	GO:0022603	regulation of anatomical structure morphogenesis
Q99988	GDF15_HUMANGrowth differentiation factor 15 OS=Homo sapiens GN=GDF15 PE=2 SV=3	P	GO:0031324	negative regulation of cellular metabolic process
Q99988	GDF15_HUMANGrowth differentiation factor 15 OS=Homo sapiens GN=GDF15 PE=2 SV=3	P	GO:0032879	regulation of localization
Q99988	GDF15_HUMANGrowth differentiation factor 15 OS=Homo sapiens GN=GDF15 PE=2 SV=3	P	GO:0042981	regulation of apoptotic process
Q99988	GDF15_HUMANGrowth differentiation factor 15 OS=Homo sapiens GN=GDF15 PE=2 SV=3	P	GO:0043408	regulation of MAPK cascade
Q99988	GDF15_HUMANGrowth differentiation factor 15 OS=Homo sapiens GN=GDF15 PE=2 SV=3	P	GO:0045597	positive regulation of cell differentiation
Q99988	GDF15_HUMANGrowth differentiation factor 15 OS=Homo sapiens GN=GDF15 PE=2 SV=3	P	GO:0048468	cell development
Q99988	GDF15_HUMANGrowth differentiation factor 15 OS=Homo sapiens GN=GDF15 PE=2 SV=3	P	GO:0048513	organ development
Q99988	GDF15_HUMANGrowth differentiation factor 15 OS=Homo sapiens GN=GDF15 PE=2 SV=3	P	GO:0051093	negative regulation of developmental process
Q99988	GDF15_HUMANGrowth differentiation factor 15 OS=Homo sapiens GN=GDF15 PE=2 SV=3	P	GO:0051128	regulation of cellular component organization
Q99988	GDF15_HUMANGrowth differentiation factor 15 OS=Homo sapiens GN=GDF15 PE=2 SV=3	P	GO:0051240	positive regulation of multicellular organismal process
Q99988	GDF15_HUMANGrowth differentiation factor 15 OS=Homo sapiens GN=GDF15 PE=2 SV=3	P	GO:0051241	negative regulation of multicellular organismal process
Q99988	GDF15_HUMANGrowth differentiation factor 15 OS=Homo sapiens GN=GDF15 PE=2 SV=3	P	GO:0060393	regulation of pathway-restricted SMAD protein phosphorylation
Q99988	GDF15_HUMANGrowth differentiation factor 15 OS=Homo sapiens GN=GDF15 PE=2 SV=3	P	GO:0065008	regulation of biological quality
Q99988	GDF15_HUMANGrowth differentiation factor 15 OS=Homo sapiens GN=GDF15 PE=2 SV=3	P	GO:0090100	positive regulation of transmembrane receptor protein serine/threonine kinase signaling pathway
Q99988	GDF15_HUMANGrowth differentiation factor 15 OS=Homo sapiens GN=GDF15 PE=2 SV=3	P	GO:2000026	regulation of multicellular organismal development
Q99988	GDF15_HUMANGrowth differentiation factor 15 OS=Homo sapiens GN=GDF15 PE=2 SV=3	P	GO:2000112	regulation of cellular macromolecule biosynthetic process
Q99988	GDF15_HUMANGrowth differentiation factor 15 OS=Homo sapiens GN=GDF15 PE=2 SV=3	P	GO:0008283	cell proliferation
Q99988	GDF15_HUMANGrowth differentiation factor 15 OS=Homo sapiens GN=GDF15 PE=2 SV=3	P	GO:0040007	growth
P09669	COX6C_HUMANCytochrome c oxidase subunit 6C OS=Homo sapiens GN=COX6C PE=1 SV=2	C	GO:0005743	mitochondrial inner membrane
P09669	COX6C_HUMANCytochrome c oxidase subunit 6C OS=Homo sapiens GN=COX6C PE=1 SV=2	F	GO:0004129	cytochrome-c oxidase activity
P09669	COX6C_HUMANCytochrome c oxidase subunit 6C OS=Homo sapiens GN=COX6C PE=1 SV=2	P	GO:0006123	mitochondrial electron transport, cytochrome c to oxygen
P09669	COX6C_HUMANCytochrome c oxidase subunit 6C OS=Homo sapiens GN=COX6C PE=1 SV=2	P	GO:0015992	proton transport
P09669	COX6C_HUMANCytochrome c oxidase subunit 6C OS=Homo sapiens GN=COX6C PE=1 SV=2	C	GO:0045277	respiratory chain complex IV
Q92876	KLK6_HUMANKallikrein-6 OS=Homo sapiens GN=KLK6 PE=1 SV=1	C	GO:0005615	extracellular space
Q92876	KLK6_HUMANKallikrein-6 OS=Homo sapiens GN=KLK6 PE=1 SV=1	C	GO:0005654	nucleoplasm
Q92876	KLK6_HUMANKallikrein-6 OS=Homo sapiens GN=KLK6 PE=1 SV=1	C	GO:0015630	microtubule cytoskeleton
Q92876	KLK6_HUMANKallikrein-6 OS=Homo sapiens GN=KLK6 PE=1 SV=1	C	GO:0031965	nuclear membrane
Q92876	KLK6_HUMANKallikrein-6 OS=Homo sapiens GN=KLK6 PE=1 SV=1	C	GO:0044444	cytoplasmic part
Q92876	KLK6_HUMANKallikrein-6 OS=Homo sapiens GN=KLK6 PE=1 SV=1	C	GO:0045171	intercellular bridge
Q92876	KLK6_HUMANKallikrein-6 OS=Homo sapiens GN=KLK6 PE=1 SV=1	F	GO:0004252	serine-type endopeptidase activity
Q92876	KLK6_HUMANKallikrein-6 OS=Homo sapiens GN=KLK6 PE=1 SV=1	F	GO:0005515	protein binding
Q92876	KLK6_HUMANKallikrein-6 OS=Homo sapiens GN=KLK6 PE=1 SV=1	P	GO:0007399	nervous system development
Q92876	KLK6_HUMANKallikrein-6 OS=Homo sapiens GN=KLK6 PE=1 SV=1	P	GO:0009611	response to wounding
Q92876	KLK6_HUMANKallikrein-6 OS=Homo sapiens GN=KLK6 PE=1 SV=1	P	GO:0009888	tissue development
Q92876	KLK6_HUMANKallikrein-6 OS=Homo sapiens GN=KLK6 PE=1 SV=1	P	GO:0016485	protein processing
Q92876	KLK6_HUMANKallikrein-6 OS=Homo sapiens GN=KLK6 PE=1 SV=1	P	GO:0044710	single-organism metabolic process
Q92876	KLK6_HUMANKallikrein-6 OS=Homo sapiens GN=KLK6 PE=1 SV=1	P	GO:0045595	regulation of cell differentiation
Q92876	KLK6_HUMANKallikrein-6 OS=Homo sapiens GN=KLK6 PE=1 SV=1	P	GO:0045745	positive regulation of G-protein coupled receptor protein signaling pathway
Q92876	KLK6_HUMANKallikrein-6 OS=Homo sapiens GN=KLK6 PE=1 SV=1	P	GO:0065008	regulation of biological quality
Q92876	KLK6_HUMANKallikrein-6 OS=Homo sapiens GN=KLK6 PE=1 SV=1	P	GO:0070997	neuron death
A8YQF4	1C15_HUMANHLA class I histocompatibility Cw-15 alpha chain OS=Homo sapiens GN=HLA-C PE=1 SV=1	C	GO:0000139	Golgi membrane
A8YQF4	1C15_HUMANHLA class I histocompatibility Cw-15 alpha chain OS=Homo sapiens GN=HLA-C PE=1 SV=1	C	GO:0009986	cell surface
A8YQF4	1C15_HUMANHLA class I histocompatibility Cw-15 alpha chain OS=Homo sapiens GN=HLA-C PE=1 SV=1	C	GO:0012507	ER to Golgi transport vesicle membrane
A8YQF4	1C15_HUMANHLA class I histocompatibility Cw-15 alpha chain OS=Homo sapiens GN=HLA-C PE=1 SV=1	C	GO:0030670	phagocytic vesicle membrane
A8YQF4	1C15_HUMANHLA class I histocompatibility Cw-15 alpha chain OS=Homo sapiens GN=HLA-C PE=1 SV=1	C	GO:0031901	early endosome membrane
A8YQF4	1C15_HUMANHLA class I histocompatibility Cw-15 alpha chain OS=Homo sapiens GN=HLA-C PE=1 SV=1	C	GO:0044459	plasma membrane part
A8YQF4	1C15_HUMANHLA class I histocompatibility Cw-15 alpha chain OS=Homo sapiens GN=HLA-C PE=1 SV=1	C	GO:0070062	extracellular vesicular exosome
A8YQF4	1C15_HUMANHLA class I histocompatibility Cw-15 alpha chain OS=Homo sapiens GN=HLA-C PE=1 SV=1	C	GO:0071556	integral to lumenal side of endoplasmic reticulum membrane
A8YQF4	1C15_HUMANHLA class I histocompatibility Cw-15 alpha chain OS=Homo sapiens GN=HLA-C PE=1 SV=1	F	GO:0046977	TAP binding
A8YQF4	1C15_HUMANHLA class I histocompatibility Cw-15 alpha chain OS=Homo sapiens GN=HLA-C PE=1 SV=1	P	GO:0002479	antigen processing and presentation of exogenous peptide antigen via MHC class I, TAP-dependent
A8YQF4	1C15_HUMANHLA class I histocompatibility Cw-15 alpha chain OS=Homo sapiens GN=HLA-C PE=1 SV=1	P	GO:0002480	antigen processing and presentation of exogenous peptide antigen via MHC class I, TAP-independent
A8YQF4	1C15_HUMANHLA class I histocompatibility Cw-15 alpha chain OS=Homo sapiens GN=HLA-C PE=1 SV=1	P	GO:0050776	regulation of immune response
A8YQF4	1C15_HUMANHLA class I histocompatibility Cw-15 alpha chain OS=Homo sapiens GN=HLA-C PE=1 SV=1	P	GO:0060333	interferon-gamma-mediated signaling pathway
A8YQF4	1C15_HUMANHLA class I histocompatibility Cw-15 alpha chain OS=Homo sapiens GN=HLA-C PE=1 SV=1	P	GO:0060337	type I interferon-mediated signaling pathway
A8YQF4	1C15_HUMANHLA class I histocompatibility Cw-15 alpha chain OS=Homo sapiens GN=HLA-C PE=1 SV=1	C	GO:0042825	TAP complex
B3KRC6	CP51A_HUMANLanosterol 14-alpha demethylase OS=Homo sapiens GN=CYP51A1 PE=1 SV=3	C	GO:0005789	endoplasmic reticulum membrane
B3KRC6	CP51A_HUMANLanosterol 14-alpha demethylase OS=Homo sapiens GN=CYP51A1 PE=1 SV=3	C	GO:0005886	plasma membrane
B3KRC6	CP51A_HUMANLanosterol 14-alpha demethylase OS=Homo sapiens GN=CYP51A1 PE=1 SV=3	F	GO:0005506	iron ion binding
B3KRC6	CP51A_HUMANLanosterol 14-alpha demethylase OS=Homo sapiens GN=CYP51A1 PE=1 SV=3	F	GO:0008398	sterol 14-demethylase activity
B3KRC6	CP51A_HUMANLanosterol 14-alpha demethylase OS=Homo sapiens GN=CYP51A1 PE=1 SV=3	F	GO:0020037	heme binding
B3KRC6	CP51A_HUMANLanosterol 14-alpha demethylase OS=Homo sapiens GN=CYP51A1 PE=1 SV=3	P	GO:0006695	cholesterol biosynthetic process
B3KRC6	CP51A_HUMANLanosterol 14-alpha demethylase OS=Homo sapiens GN=CYP51A1 PE=1 SV=3	P	GO:0032787	monocarboxylic acid metabolic process
B3KRC6	CP51A_HUMANLanosterol 14-alpha demethylase OS=Homo sapiens GN=CYP51A1 PE=1 SV=3	P	GO:0044255	cellular lipid metabolic process
B3KRC6	CP51A_HUMANLanosterol 14-alpha demethylase OS=Homo sapiens GN=CYP51A1 PE=1 SV=3	P	GO:0055114	oxidation-reduction process
Q86U90	YRDC_HUMAN domain-containing mitochondrial OS=Homo sapiens GN=YRDC PE=1 SV=1	C	GO:0005737	cytoplasm
Q86U90	YRDC_HUMAN domain-containing mitochondrial OS=Homo sapiens GN=YRDC PE=1 SV=1	F	GO:0003725	double-stranded RNA binding
Q86U90	YRDC_HUMAN domain-containing mitochondrial OS=Homo sapiens GN=YRDC PE=1 SV=1	P	GO:0051051	negative regulation of transport
O15173	PGRC2_HUMANMembrane-associated progesterone receptor component 2 OS=Homo sapiens GN=PGRMC2 PE=1 SV=1	C	GO:0005783	endoplasmic reticulum
O15173	PGRC2_HUMANMembrane-associated progesterone receptor component 2 OS=Homo sapiens GN=PGRMC2 PE=1 SV=1	C	GO:0016021	integral to membrane
O15173	PGRC2_HUMANMembrane-associated progesterone receptor component 2 OS=Homo sapiens GN=PGRMC2 PE=1 SV=1	C	GO:0031981	nuclear lumen
O15173	PGRC2_HUMANMembrane-associated progesterone receptor component 2 OS=Homo sapiens GN=PGRMC2 PE=1 SV=1	C	GO:0044421	extracellular region part
O15173	PGRC2_HUMANMembrane-associated progesterone receptor component 2 OS=Homo sapiens GN=PGRMC2 PE=1 SV=1	F	GO:0003707	steroid hormone receptor activity
O15173	PGRC2_HUMANMembrane-associated progesterone receptor component 2 OS=Homo sapiens GN=PGRMC2 PE=1 SV=1	F	GO:0005496	steroid binding
O15173	PGRC2_HUMANMembrane-associated progesterone receptor component 2 OS=Homo sapiens GN=PGRMC2 PE=1 SV=1	F	GO:0005515	protein binding
O15173	PGRC2_HUMANMembrane-associated progesterone receptor component 2 OS=Homo sapiens GN=PGRMC2 PE=1 SV=1	P	GO:0006355	regulation of transcription, DNA-dependent
O15173	PGRC2_HUMANMembrane-associated progesterone receptor component 2 OS=Homo sapiens GN=PGRMC2 PE=1 SV=1	P	GO:0007165	signal transduction
H3BMQ2	RLP24_HUMANProbable ribosome biogenesis RLP24 OS=Homo sapiens GN=RSL24D1 PE=1 SV=1	C	GO:0005730	nucleolus
H3BMQ2	RLP24_HUMANProbable ribosome biogenesis RLP24 OS=Homo sapiens GN=RSL24D1 PE=1 SV=1	C	GO:0005840	ribosome
H3BMQ2	RLP24_HUMANProbable ribosome biogenesis RLP24 OS=Homo sapiens GN=RSL24D1 PE=1 SV=1	F	GO:0005515	protein binding
H3BMQ2	RLP24_HUMANProbable ribosome biogenesis RLP24 OS=Homo sapiens GN=RSL24D1 PE=1 SV=1	P	GO:0022618	ribonucleoprotein complex assembly
H3BMQ2	RLP24_HUMANProbable ribosome biogenesis RLP24 OS=Homo sapiens GN=RSL24D1 PE=1 SV=1	P	GO:0042254	ribosome biogenesis
B2RA70	YES_HUMANTyrosine- kinase Yes OS=Homo sapiens GN=YES1 PE=1 SV=3	C	GO:0005743	mitochondrial inner membrane
B2RA70	YES_HUMANTyrosine- kinase Yes OS=Homo sapiens GN=YES1 PE=1 SV=3	C	GO:0005764	lysosome
B2RA70	YES_HUMANTyrosine- kinase Yes OS=Homo sapiens GN=YES1 PE=1 SV=3	C	GO:0005770	late endosome
B2RA70	YES_HUMANTyrosine- kinase Yes OS=Homo sapiens GN=YES1 PE=1 SV=3	C	GO:0005794	Golgi apparatus
B2RA70	YES_HUMANTyrosine- kinase Yes OS=Homo sapiens GN=YES1 PE=1 SV=3	C	GO:0005829	cytosol
B2RA70	YES_HUMANTyrosine- kinase Yes OS=Homo sapiens GN=YES1 PE=1 SV=3	C	GO:0005901	caveola
B2RA70	YES_HUMANTyrosine- kinase Yes OS=Homo sapiens GN=YES1 PE=1 SV=3	C	GO:0005925	focal adhesion
B2RA70	YES_HUMANTyrosine- kinase Yes OS=Homo sapiens GN=YES1 PE=1 SV=3	C	GO:0015629	actin cytoskeleton
B2RA70	YES_HUMANTyrosine- kinase Yes OS=Homo sapiens GN=YES1 PE=1 SV=3	C	GO:0044430	cytoskeletal part
B2RA70	YES_HUMANTyrosine- kinase Yes OS=Homo sapiens GN=YES1 PE=1 SV=3	C	GO:0070062	extracellular vesicular exosome
B2RA70	YES_HUMANTyrosine- kinase Yes OS=Homo sapiens GN=YES1 PE=1 SV=3	F	GO:0004715	non-membrane spanning protein tyrosine kinase activity
B2RA70	YES_HUMANTyrosine- kinase Yes OS=Homo sapiens GN=YES1 PE=1 SV=3	F	GO:0005524	ATP binding
B2RA70	YES_HUMANTyrosine- kinase Yes OS=Homo sapiens GN=YES1 PE=1 SV=3	F	GO:0019900	kinase binding
B2RA70	YES_HUMANTyrosine- kinase Yes OS=Homo sapiens GN=YES1 PE=1 SV=3	F	GO:0020037	heme binding
B2RA70	YES_HUMANTyrosine- kinase Yes OS=Homo sapiens GN=YES1 PE=1 SV=3	F	GO:0032403	protein complex binding
B2RA70	YES_HUMANTyrosine- kinase Yes OS=Homo sapiens GN=YES1 PE=1 SV=3	F	GO:0034987	immunoglobulin receptor binding
B2RA70	YES_HUMANTyrosine- kinase Yes OS=Homo sapiens GN=YES1 PE=1 SV=3	F	GO:0042169	SH2 domain binding
B2RA70	YES_HUMANTyrosine- kinase Yes OS=Homo sapiens GN=YES1 PE=1 SV=3	F	GO:0044325	ion channel binding
B2RA70	YES_HUMANTyrosine- kinase Yes OS=Homo sapiens GN=YES1 PE=1 SV=3	F	GO:0046875	ephrin receptor binding
B2RA70	YES_HUMANTyrosine- kinase Yes OS=Homo sapiens GN=YES1 PE=1 SV=3	F	GO:0050839	cell adhesion molecule binding
B2RA70	YES_HUMANTyrosine- kinase Yes OS=Homo sapiens GN=YES1 PE=1 SV=3	F	GO:0051219	phosphoprotein binding
B2RA70	YES_HUMANTyrosine- kinase Yes OS=Homo sapiens GN=YES1 PE=1 SV=3	F	GO:0070851	growth factor receptor binding
B2RA70	YES_HUMANTyrosine- kinase Yes OS=Homo sapiens GN=YES1 PE=1 SV=3	F	GO:0097110	scaffold protein binding
B2RA70	YES_HUMANTyrosine- kinase Yes OS=Homo sapiens GN=YES1 PE=1 SV=3	P	GO:0001101	response to acid
B2RA70	YES_HUMANTyrosine- kinase Yes OS=Homo sapiens GN=YES1 PE=1 SV=3	P	GO:0002521	leukocyte differentiation
B2RA70	YES_HUMANTyrosine- kinase Yes OS=Homo sapiens GN=YES1 PE=1 SV=3	P	GO:0002683	negative regulation of immune system process
B2RA70	YES_HUMANTyrosine- kinase Yes OS=Homo sapiens GN=YES1 PE=1 SV=3	P	GO:0002758	innate immune response-activating signal transduction
B2RA70	YES_HUMANTyrosine- kinase Yes OS=Homo sapiens GN=YES1 PE=1 SV=3	P	GO:0006355	regulation of transcription, DNA-dependent
B2RA70	YES_HUMANTyrosine- kinase Yes OS=Homo sapiens GN=YES1 PE=1 SV=3	P	GO:0006887	exocytosis
B2RA70	YES_HUMANTyrosine- kinase Yes OS=Homo sapiens GN=YES1 PE=1 SV=3	P	GO:0007179	transforming growth factor beta receptor signaling pathway
B2RA70	YES_HUMANTyrosine- kinase Yes OS=Homo sapiens GN=YES1 PE=1 SV=3	P	GO:0007229	integrin-mediated signaling pathway
B2RA70	YES_HUMANTyrosine- kinase Yes OS=Homo sapiens GN=YES1 PE=1 SV=3	P	GO:0007596	blood coagulation
B2RA70	YES_HUMANTyrosine- kinase Yes OS=Homo sapiens GN=YES1 PE=1 SV=3	P	GO:0008284	positive regulation of cell proliferation
B2RA70	YES_HUMANTyrosine- kinase Yes OS=Homo sapiens GN=YES1 PE=1 SV=3	P	GO:0008285	negative regulation of cell proliferation
B2RA70	YES_HUMANTyrosine- kinase Yes OS=Homo sapiens GN=YES1 PE=1 SV=3	P	GO:0009628	response to abiotic stimulus
B2RA70	YES_HUMANTyrosine- kinase Yes OS=Homo sapiens GN=YES1 PE=1 SV=3	P	GO:0010634	positive regulation of epithelial cell migration
B2RA70	YES_HUMANTyrosine- kinase Yes OS=Homo sapiens GN=YES1 PE=1 SV=3	P	GO:0014066	regulation of phosphatidylinositol 3-kinase cascade
B2RA70	YES_HUMANTyrosine- kinase Yes OS=Homo sapiens GN=YES1 PE=1 SV=3	P	GO:0031295	T cell costimulation
B2RA70	YES_HUMANTyrosine- kinase Yes OS=Homo sapiens GN=YES1 PE=1 SV=3	P	GO:0031334	positive regulation of protein complex assembly
B2RA70	YES_HUMANTyrosine- kinase Yes OS=Homo sapiens GN=YES1 PE=1 SV=3	P	GO:0032101	regulation of response to external stimulus
B2RA70	YES_HUMANTyrosine- kinase Yes OS=Homo sapiens GN=YES1 PE=1 SV=3	P	GO:0032211	negative regulation of telomere maintenance via telomerase
B2RA70	YES_HUMANTyrosine- kinase Yes OS=Homo sapiens GN=YES1 PE=1 SV=3	P	GO:0032463	negative regulation of protein homooligomerization
B2RA70	YES_HUMANTyrosine- kinase Yes OS=Homo sapiens GN=YES1 PE=1 SV=3	P	GO:0032956	regulation of actin cytoskeleton organization
B2RA70	YES_HUMANTyrosine- kinase Yes OS=Homo sapiens GN=YES1 PE=1 SV=3	P	GO:0033554	cellular response to stress
B2RA70	YES_HUMANTyrosine- kinase Yes OS=Homo sapiens GN=YES1 PE=1 SV=3	P	GO:0038096	Fc-gamma receptor signaling pathway involved in phagocytosis
B2RA70	YES_HUMANTyrosine- kinase Yes OS=Homo sapiens GN=YES1 PE=1 SV=3	P	GO:0038127	ERBB signaling pathway
B2RA70	YES_HUMANTyrosine- kinase Yes OS=Homo sapiens GN=YES1 PE=1 SV=3	P	GO:0043065	positive regulation of apoptotic process
B2RA70	YES_HUMANTyrosine- kinase Yes OS=Homo sapiens GN=YES1 PE=1 SV=3	P	GO:0043114	regulation of vascular permeability
B2RA70	YES_HUMANTyrosine- kinase Yes OS=Homo sapiens GN=YES1 PE=1 SV=3	P	GO:0043149	stress fiber assembly
B2RA70	YES_HUMANTyrosine- kinase Yes OS=Homo sapiens GN=YES1 PE=1 SV=3	P	GO:0043154	negative regulation of cysteine-type endopeptidase activity involved in apoptotic process
B2RA70	YES_HUMANTyrosine- kinase Yes OS=Homo sapiens GN=YES1 PE=1 SV=3	P	GO:0044710	single-organism metabolic process
B2RA70	YES_HUMANTyrosine- kinase Yes OS=Homo sapiens GN=YES1 PE=1 SV=3	P	GO:0046777	protein autophosphorylation
B2RA70	YES_HUMANTyrosine- kinase Yes OS=Homo sapiens GN=YES1 PE=1 SV=3	P	GO:0048013	ephrin receptor signaling pathway
B2RA70	YES_HUMANTyrosine- kinase Yes OS=Homo sapiens GN=YES1 PE=1 SV=3	P	GO:0048545	response to steroid hormone stimulus
B2RA70	YES_HUMANTyrosine- kinase Yes OS=Homo sapiens GN=YES1 PE=1 SV=3	P	GO:0050708	regulation of protein secretion
B2RA70	YES_HUMANTyrosine- kinase Yes OS=Homo sapiens GN=YES1 PE=1 SV=3	P	GO:0050731	positive regulation of peptidyl-tyrosine phosphorylation
B2RA70	YES_HUMANTyrosine- kinase Yes OS=Homo sapiens GN=YES1 PE=1 SV=3	P	GO:0050769	positive regulation of neurogenesis
B2RA70	YES_HUMANTyrosine- kinase Yes OS=Homo sapiens GN=YES1 PE=1 SV=3	P	GO:0050851	antigen receptor-mediated signaling pathway
B2RA70	YES_HUMANTyrosine- kinase Yes OS=Homo sapiens GN=YES1 PE=1 SV=3	P	GO:0050900	leukocyte migration
B2RA70	YES_HUMANTyrosine- kinase Yes OS=Homo sapiens GN=YES1 PE=1 SV=3	P	GO:0051222	positive regulation of protein transport
B2RA70	YES_HUMANTyrosine- kinase Yes OS=Homo sapiens GN=YES1 PE=1 SV=3	P	GO:0051495	positive regulation of cytoskeleton organization
B2RA70	YES_HUMANTyrosine- kinase Yes OS=Homo sapiens GN=YES1 PE=1 SV=3	P	GO:0051707	response to other organism
B2RA70	YES_HUMANTyrosine- kinase Yes OS=Homo sapiens GN=YES1 PE=1 SV=3	P	GO:0051897	positive regulation of protein kinase B signaling cascade
B2RA70	YES_HUMANTyrosine- kinase Yes OS=Homo sapiens GN=YES1 PE=1 SV=3	P	GO:0051902	negative regulation of mitochondrial depolarization
B2RA70	YES_HUMANTyrosine- kinase Yes OS=Homo sapiens GN=YES1 PE=1 SV=3	P	GO:0051974	negative regulation of telomerase activity
B2RA70	YES_HUMANTyrosine- kinase Yes OS=Homo sapiens GN=YES1 PE=1 SV=3	P	GO:0070555	response to interleukin-1
B2RA70	YES_HUMANTyrosine- kinase Yes OS=Homo sapiens GN=YES1 PE=1 SV=3	P	GO:0070663	regulation of leukocyte proliferation
B2RA70	YES_HUMANTyrosine- kinase Yes OS=Homo sapiens GN=YES1 PE=1 SV=3	P	GO:0071375	cellular response to peptide hormone stimulus
B2RA70	YES_HUMANTyrosine- kinase Yes OS=Homo sapiens GN=YES1 PE=1 SV=3	P	GO:0071396	cellular response to lipid
B2RA70	YES_HUMANTyrosine- kinase Yes OS=Homo sapiens GN=YES1 PE=1 SV=3	P	GO:0071801	regulation of podosome assembly
B2RA70	YES_HUMANTyrosine- kinase Yes OS=Homo sapiens GN=YES1 PE=1 SV=3	P	GO:0071902	positive regulation of protein serine/threonine kinase activity
B2RA70	YES_HUMANTyrosine- kinase Yes OS=Homo sapiens GN=YES1 PE=1 SV=3	N	GO:1903532
B2RA70	YES_HUMANTyrosine- kinase Yes OS=Homo sapiens GN=YES1 PE=1 SV=3	P	GO:2000394	positive regulation of lamellipodium morphogenesis
B2RA70	YES_HUMANTyrosine- kinase Yes OS=Homo sapiens GN=YES1 PE=1 SV=3	P	GO:2000641	regulation of early endosome to late endosome transport
B2RA70	YES_HUMANTyrosine- kinase Yes OS=Homo sapiens GN=YES1 PE=1 SV=3	P	GO:2000811	negative regulation of anoikis
B2RA70	YES_HUMANTyrosine- kinase Yes OS=Homo sapiens GN=YES1 PE=1 SV=3	P	GO:2001237	negative regulation of extrinsic apoptotic signaling pathway
B2RA70	YES_HUMANTyrosine- kinase Yes OS=Homo sapiens GN=YES1 PE=1 SV=3	P	GO:2001243	negative regulation of intrinsic apoptotic signaling pathway
B2RA70	YES_HUMANTyrosine- kinase Yes OS=Homo sapiens GN=YES1 PE=1 SV=3	P	GO:2001286	regulation of caveolin-mediated endocytosis
A8MW49	FABPL_HUMANFatty acid-binding liver OS=Homo sapiens GN=FABP1 PE=1 SV=1	C	GO:0005654	nucleoplasm
A8MW49	FABPL_HUMANFatty acid-binding liver OS=Homo sapiens GN=FABP1 PE=1 SV=1	C	GO:0005829	cytosol
A8MW49	FABPL_HUMANFatty acid-binding liver OS=Homo sapiens GN=FABP1 PE=1 SV=1	C	GO:0070062	extracellular vesicular exosome
A8MW49	FABPL_HUMANFatty acid-binding liver OS=Homo sapiens GN=FABP1 PE=1 SV=1	F	GO:0005215	transporter activity
A8MW49	FABPL_HUMANFatty acid-binding liver OS=Homo sapiens GN=FABP1 PE=1 SV=1	F	GO:0005515	protein binding
A8MW49	FABPL_HUMANFatty acid-binding liver OS=Homo sapiens GN=FABP1 PE=1 SV=1	F	GO:0008289	lipid binding
A8MW49	FABPL_HUMANFatty acid-binding liver OS=Homo sapiens GN=FABP1 PE=1 SV=1	F	GO:0016209	antioxidant activity
A8MW49	FABPL_HUMANFatty acid-binding liver OS=Homo sapiens GN=FABP1 PE=1 SV=1	P	GO:0002230	positive regulation of defense response to virus by host
A8MW49	FABPL_HUMANFatty acid-binding liver OS=Homo sapiens GN=FABP1 PE=1 SV=1	P	GO:0006810	transport
A8MW49	FABPL_HUMANFatty acid-binding liver OS=Homo sapiens GN=FABP1 PE=1 SV=1	P	GO:0019433	triglyceride catabolic process
A8MW49	FABPL_HUMANFatty acid-binding liver OS=Homo sapiens GN=FABP1 PE=1 SV=1	P	GO:0043154	negative regulation of cysteine-type endopeptidase activity involved in apoptotic process
A8MW49	FABPL_HUMANFatty acid-binding liver OS=Homo sapiens GN=FABP1 PE=1 SV=1	P	GO:0044707	single-multicellular organism process
A8MW49	FABPL_HUMANFatty acid-binding liver OS=Homo sapiens GN=FABP1 PE=1 SV=1	P	GO:0070301	cellular response to hydrogen peroxide
A8MW49	FABPL_HUMANFatty acid-binding liver OS=Homo sapiens GN=FABP1 PE=1 SV=1	P	GO:0071456	cellular response to hypoxia
A8MW49	FABPL_HUMANFatty acid-binding liver OS=Homo sapiens GN=FABP1 PE=1 SV=1	N	GO:0098779
A8MW49	FABPL_HUMANFatty acid-binding liver OS=Homo sapiens GN=FABP1 PE=1 SV=1	N	GO:0098792
Q5JXX1	MO4L2_HUMANMortality factor 4 2 OS=Homo sapiens GN=MORF4L2 PE=1 SV=1	C	GO:0005730	nucleolus
Q5JXX1	MO4L2_HUMANMortality factor 4 2 OS=Homo sapiens GN=MORF4L2 PE=1 SV=1	C	GO:0005886	plasma membrane
Q5JXX1	MO4L2_HUMANMortality factor 4 2 OS=Homo sapiens GN=MORF4L2 PE=1 SV=1	C	GO:0044451	nucleoplasm part
Q5JXX1	MO4L2_HUMANMortality factor 4 2 OS=Homo sapiens GN=MORF4L2 PE=1 SV=1	N	GO:1902494
Q5JXX1	MO4L2_HUMANMortality factor 4 2 OS=Homo sapiens GN=MORF4L2 PE=1 SV=1	F	GO:0005515	protein binding
Q5JXX1	MO4L2_HUMANMortality factor 4 2 OS=Homo sapiens GN=MORF4L2 PE=1 SV=1	P	GO:0006259	DNA metabolic process
Q5JXX1	MO4L2_HUMANMortality factor 4 2 OS=Homo sapiens GN=MORF4L2 PE=1 SV=1	P	GO:0006355	regulation of transcription, DNA-dependent
Q5JXX1	MO4L2_HUMANMortality factor 4 2 OS=Homo sapiens GN=MORF4L2 PE=1 SV=1	P	GO:0006974	response to DNA damage stimulus
Q5JXX1	MO4L2_HUMANMortality factor 4 2 OS=Homo sapiens GN=MORF4L2 PE=1 SV=1	P	GO:0016573	histone acetylation
Q5JXX1	MO4L2_HUMANMortality factor 4 2 OS=Homo sapiens GN=MORF4L2 PE=1 SV=1	P	GO:0044699	single-organism process
P62861	RS30_HUMAN40S ribosomal S30 OS=Homo sapiens GN=FAU PE=1 SV=1	C	GO:0005615	extracellular space
P62861	RS30_HUMAN40S ribosomal S30 OS=Homo sapiens GN=FAU PE=1 SV=1	C	GO:0005654	nucleoplasm
P62861	RS30_HUMAN40S ribosomal S30 OS=Homo sapiens GN=FAU PE=1 SV=1	C	GO:0022627	cytosolic small ribosomal subunit
P62861	RS30_HUMAN40S ribosomal S30 OS=Homo sapiens GN=FAU PE=1 SV=1	F	GO:0003723	RNA binding
P62861	RS30_HUMAN40S ribosomal S30 OS=Homo sapiens GN=FAU PE=1 SV=1	F	GO:0003735	structural constituent of ribosome
P62861	RS30_HUMAN40S ribosomal S30 OS=Homo sapiens GN=FAU PE=1 SV=1	P	GO:0000184	nuclear-transcribed mRNA catabolic process, nonsense-mediated decay
P62861	RS30_HUMAN40S ribosomal S30 OS=Homo sapiens GN=FAU PE=1 SV=1	P	GO:0002227	innate immune response in mucosa
P62861	RS30_HUMAN40S ribosomal S30 OS=Homo sapiens GN=FAU PE=1 SV=1	P	GO:0006364	rRNA processing
P62861	RS30_HUMAN40S ribosomal S30 OS=Homo sapiens GN=FAU PE=1 SV=1	P	GO:0006413	translational initiation
P62861	RS30_HUMAN40S ribosomal S30 OS=Homo sapiens GN=FAU PE=1 SV=1	P	GO:0006614	SRP-dependent cotranslational protein targeting to membrane
P62861	RS30_HUMAN40S ribosomal S30 OS=Homo sapiens GN=FAU PE=1 SV=1	P	GO:0019083	viral transcription
P62861	RS30_HUMAN40S ribosomal S30 OS=Homo sapiens GN=FAU PE=1 SV=1	P	GO:0019731	antibacterial humoral response
P62861	RS30_HUMAN40S ribosomal S30 OS=Homo sapiens GN=FAU PE=1 SV=1	P	GO:0050830	defense response to Gram-positive bacterium
O75487	GPC4_HUMANGlypican-4 OS=Homo sapiens GN=GPC4 PE=1 SV=4	C	GO:0005578	proteinaceous extracellular matrix
O75487	GPC4_HUMANGlypican-4 OS=Homo sapiens GN=GPC4 PE=1 SV=4	C	GO:0005634	nucleus
O75487	GPC4_HUMANGlypican-4 OS=Homo sapiens GN=GPC4 PE=1 SV=4	C	GO:0005796	Golgi lumen
O75487	GPC4_HUMANGlypican-4 OS=Homo sapiens GN=GPC4 PE=1 SV=4	C	GO:0005887	integral to plasma membrane
O75487	GPC4_HUMANGlypican-4 OS=Homo sapiens GN=GPC4 PE=1 SV=4	C	GO:0009897	external side of plasma membrane
O75487	GPC4_HUMANGlypican-4 OS=Homo sapiens GN=GPC4 PE=1 SV=4	C	GO:0043202	lysosomal lumen
O75487	GPC4_HUMANGlypican-4 OS=Homo sapiens GN=GPC4 PE=1 SV=4	C	GO:0070062	extracellular vesicular exosome
O75487	GPC4_HUMANGlypican-4 OS=Homo sapiens GN=GPC4 PE=1 SV=4	F	GO:0043395	heparan sulfate proteoglycan binding
O75487	GPC4_HUMANGlypican-4 OS=Homo sapiens GN=GPC4 PE=1 SV=4	P	GO:0001523	retinoid metabolic process
O75487	GPC4_HUMANGlypican-4 OS=Homo sapiens GN=GPC4 PE=1 SV=4	P	GO:0006024	glycosaminoglycan biosynthetic process
O75487	GPC4_HUMANGlypican-4 OS=Homo sapiens GN=GPC4 PE=1 SV=4	P	GO:0006027	glycosaminoglycan catabolic process
O75487	GPC4_HUMANGlypican-4 OS=Homo sapiens GN=GPC4 PE=1 SV=4	P	GO:0006928	cellular component movement
O75487	GPC4_HUMANGlypican-4 OS=Homo sapiens GN=GPC4 PE=1 SV=4	P	GO:0008283	cell proliferation
O75487	GPC4_HUMANGlypican-4 OS=Homo sapiens GN=GPC4 PE=1 SV=4	P	GO:0009653	anatomical structure morphogenesis
O75487	GPC4_HUMANGlypican-4 OS=Homo sapiens GN=GPC4 PE=1 SV=4	P	GO:0040011	locomotion
O75487	GPC4_HUMANGlypican-4 OS=Homo sapiens GN=GPC4 PE=1 SV=4	P	GO:0048513	organ development
O75487	GPC4_HUMANGlypican-4 OS=Homo sapiens GN=GPC4 PE=1 SV=4	P	GO:0050794	regulation of cellular process
Q8TDD1	DDX54_HUMANATP-dependent RNA helicase DDX54 OS=Homo sapiens GN=DDX54 PE=1 SV=2	C	GO:0005730	nucleolus
Q8TDD1	DDX54_HUMANATP-dependent RNA helicase DDX54 OS=Homo sapiens GN=DDX54 PE=1 SV=2	C	GO:0016020	membrane
Q8TDD1	DDX54_HUMANATP-dependent RNA helicase DDX54 OS=Homo sapiens GN=DDX54 PE=1 SV=2	F	GO:0003714	transcription corepressor activity
Q8TDD1	DDX54_HUMANATP-dependent RNA helicase DDX54 OS=Homo sapiens GN=DDX54 PE=1 SV=2	F	GO:0004004	ATP-dependent RNA helicase activity
Q8TDD1	DDX54_HUMANATP-dependent RNA helicase DDX54 OS=Homo sapiens GN=DDX54 PE=1 SV=2	F	GO:0005524	ATP binding
Q8TDD1	DDX54_HUMANATP-dependent RNA helicase DDX54 OS=Homo sapiens GN=DDX54 PE=1 SV=2	F	GO:0030331	estrogen receptor binding
Q8TDD1	DDX54_HUMANATP-dependent RNA helicase DDX54 OS=Homo sapiens GN=DDX54 PE=1 SV=2	N	GO:0044822
Q8TDD1	DDX54_HUMANATP-dependent RNA helicase DDX54 OS=Homo sapiens GN=DDX54 PE=1 SV=2	P	GO:0006396	RNA processing
Q8TDD1	DDX54_HUMANATP-dependent RNA helicase DDX54 OS=Homo sapiens GN=DDX54 PE=1 SV=2	P	GO:0010605	negative regulation of macromolecule metabolic process
Q8TDD1	DDX54_HUMANATP-dependent RNA helicase DDX54 OS=Homo sapiens GN=DDX54 PE=1 SV=2	P	GO:0030520	intracellular estrogen receptor signaling pathway
Q8TDD1	DDX54_HUMANATP-dependent RNA helicase DDX54 OS=Homo sapiens GN=DDX54 PE=1 SV=2	P	GO:0051171	regulation of nitrogen compound metabolic process
Q8TDD1	DDX54_HUMANATP-dependent RNA helicase DDX54 OS=Homo sapiens GN=DDX54 PE=1 SV=2	P	GO:2000112	regulation of cellular macromolecule biosynthetic process
Q8TDD1	DDX54_HUMANATP-dependent RNA helicase DDX54 OS=Homo sapiens GN=DDX54 PE=1 SV=2	C	GO:0005667	transcription factor complex
Q8TDD1	DDX54_HUMANATP-dependent RNA helicase DDX54 OS=Homo sapiens GN=DDX54 PE=1 SV=2	P	GO:0016481	negative regulation of transcription, DNA-dependent
Q9ULW0	TPX2_HUMANTargeting for Xklp2 OS=Homo sapiens GN=TPX2 PE=1 SV=2	C	GO:0000922	spindle pole
Q9ULW0	TPX2_HUMANTargeting for Xklp2 OS=Homo sapiens GN=TPX2 PE=1 SV=2	C	GO:0005654	nucleoplasm
Q9ULW0	TPX2_HUMANTargeting for Xklp2 OS=Homo sapiens GN=TPX2 PE=1 SV=2	C	GO:0005829	cytosol
Q9ULW0	TPX2_HUMANTargeting for Xklp2 OS=Homo sapiens GN=TPX2 PE=1 SV=2	C	GO:0005874	microtubule
Q9ULW0	TPX2_HUMANTargeting for Xklp2 OS=Homo sapiens GN=TPX2 PE=1 SV=2	F	GO:0005524	ATP binding
Q9ULW0	TPX2_HUMANTargeting for Xklp2 OS=Homo sapiens GN=TPX2 PE=1 SV=2	F	GO:0005525	GTP binding
Q9ULW0	TPX2_HUMANTargeting for Xklp2 OS=Homo sapiens GN=TPX2 PE=1 SV=2	F	GO:0019901	protein kinase binding
Q9ULW0	TPX2_HUMANTargeting for Xklp2 OS=Homo sapiens GN=TPX2 PE=1 SV=2	N	GO:0061676
Q9ULW0	TPX2_HUMANTargeting for Xklp2 OS=Homo sapiens GN=TPX2 PE=1 SV=2	P	GO:0000086	G2/M transition of mitotic cell cycle
Q9ULW0	TPX2_HUMANTargeting for Xklp2 OS=Homo sapiens GN=TPX2 PE=1 SV=2	P	GO:0008283	cell proliferation
Q9ULW0	TPX2_HUMANTargeting for Xklp2 OS=Homo sapiens GN=TPX2 PE=1 SV=2	P	GO:0032147	activation of protein kinase activity
Q9ULW0	TPX2_HUMANTargeting for Xklp2 OS=Homo sapiens GN=TPX2 PE=1 SV=2	P	GO:0060236	regulation of mitotic spindle organization
Q9ULW0	TPX2_HUMANTargeting for Xklp2 OS=Homo sapiens GN=TPX2 PE=1 SV=2	P	GO:0090307	spindle assembly involved in mitosis
Q9ULW0	TPX2_HUMANTargeting for Xklp2 OS=Homo sapiens GN=TPX2 PE=1 SV=2	P	GO:1901796	regulation of signal transduction by p53 class mediator
A8K4B4	NUSAP_HUMANNucleolar and spindle-associated 1 OS=Homo sapiens GN=NUSAP1 PE=1 SV=1	C	GO:0005730	nucleolus
A8K4B4	NUSAP_HUMANNucleolar and spindle-associated 1 OS=Homo sapiens GN=NUSAP1 PE=1 SV=1	C	GO:0005737	cytoplasm
A8K4B4	NUSAP_HUMANNucleolar and spindle-associated 1 OS=Homo sapiens GN=NUSAP1 PE=1 SV=1	C	GO:0005819	spindle
A8K4B4	NUSAP_HUMANNucleolar and spindle-associated 1 OS=Homo sapiens GN=NUSAP1 PE=1 SV=1	C	GO:0005874	microtubule
A8K4B4	NUSAP_HUMANNucleolar and spindle-associated 1 OS=Homo sapiens GN=NUSAP1 PE=1 SV=1	F	GO:0005515	protein binding
A8K4B4	NUSAP_HUMANNucleolar and spindle-associated 1 OS=Homo sapiens GN=NUSAP1 PE=1 SV=1	N	GO:0044822
A8K4B4	NUSAP_HUMANNucleolar and spindle-associated 1 OS=Homo sapiens GN=NUSAP1 PE=1 SV=1	P	GO:0000281	mitotic cytokinesis
A8K4B4	NUSAP_HUMANNucleolar and spindle-associated 1 OS=Homo sapiens GN=NUSAP1 PE=1 SV=1	P	GO:0007076	mitotic chromosome condensation
A8K4B4	NUSAP_HUMANNucleolar and spindle-associated 1 OS=Homo sapiens GN=NUSAP1 PE=1 SV=1	P	GO:0040001	establishment of mitotic spindle localization
A8K4B4	NUSAP_HUMANNucleolar and spindle-associated 1 OS=Homo sapiens GN=NUSAP1 PE=1 SV=1	P	GO:0045840	positive regulation of mitosis
Q5T7U1	TF3C5_HUMANGeneral transcription factor 3C polypeptide 5 OS=Homo sapiens GN=GTF3C5 PE=1 SV=2	C	GO:0005634	nucleus
Q5T7U1	TF3C5_HUMANGeneral transcription factor 3C polypeptide 5 OS=Homo sapiens GN=GTF3C5 PE=1 SV=2	P	GO:0006351	transcription, DNA-dependent
Q9Y6H1	CHCH2_HUMANCoiled-coil-helix-coiled-coil-helix domain-containing 2 OS=Homo sapiens GN=CHCHD2 PE=1 SV=1	C	GO:0005634	nucleus
Q9Y6H1	CHCH2_HUMANCoiled-coil-helix-coiled-coil-helix domain-containing 2 OS=Homo sapiens GN=CHCHD2 PE=1 SV=1	C	GO:0005739	mitochondrion
Q9Y6H1	CHCH2_HUMANCoiled-coil-helix-coiled-coil-helix domain-containing 2 OS=Homo sapiens GN=CHCHD2 PE=1 SV=1	F	GO:0008134	transcription factor binding
Q9Y6H1	CHCH2_HUMANCoiled-coil-helix-coiled-coil-helix domain-containing 2 OS=Homo sapiens GN=CHCHD2 PE=1 SV=1	F	GO:0043565	sequence-specific DNA binding
Q9Y6H1	CHCH2_HUMANCoiled-coil-helix-coiled-coil-helix domain-containing 2 OS=Homo sapiens GN=CHCHD2 PE=1 SV=1	P	GO:0045944	positive regulation of transcription from RNA polymerase II promoter
Q9Y6H1	CHCH2_HUMANCoiled-coil-helix-coiled-coil-helix domain-containing 2 OS=Homo sapiens GN=CHCHD2 PE=1 SV=1	P	GO:1900037	regulation of cellular response to hypoxia
Q9Y6H1	CHCH2_HUMANCoiled-coil-helix-coiled-coil-helix domain-containing 2 OS=Homo sapiens GN=CHCHD2 PE=1 SV=1	C	GO:0005667	transcription factor complex
Q13823	NOG2_HUMANNucleolar GTP-binding 2 OS=Homo sapiens GN=GNL2 PE=1 SV=1	C	GO:0005730	nucleolus
Q13823	NOG2_HUMANNucleolar GTP-binding 2 OS=Homo sapiens GN=GNL2 PE=1 SV=1	C	GO:0016020	membrane
Q13823	NOG2_HUMANNucleolar GTP-binding 2 OS=Homo sapiens GN=GNL2 PE=1 SV=1	F	GO:0005525	GTP binding
Q13823	NOG2_HUMANNucleolar GTP-binding 2 OS=Homo sapiens GN=GNL2 PE=1 SV=1	F	GO:0016787	hydrolase activity
Q13823	NOG2_HUMANNucleolar GTP-binding 2 OS=Homo sapiens GN=GNL2 PE=1 SV=1	N	GO:0044822
Q13823	NOG2_HUMANNucleolar GTP-binding 2 OS=Homo sapiens GN=GNL2 PE=1 SV=1	P	GO:0031323	regulation of cellular metabolic process
Q13823	NOG2_HUMANNucleolar GTP-binding 2 OS=Homo sapiens GN=GNL2 PE=1 SV=1	P	GO:0060255	regulation of macromolecule metabolic process
Q13823	NOG2_HUMANNucleolar GTP-binding 2 OS=Homo sapiens GN=GNL2 PE=1 SV=1	P	GO:0080090	regulation of primary metabolic process
P0CJ79	ZN888_HUMANZinc finger 888 OS=Homo sapiens GN=ZNF888 PE=3 SV=1	C	GO:0005622	intracellular
P0CJ79	ZN888_HUMANZinc finger 888 OS=Homo sapiens GN=ZNF888 PE=3 SV=1	F	GO:0003676	nucleic acid binding
P0CJ79	ZN888_HUMANZinc finger 888 OS=Homo sapiens GN=ZNF888 PE=3 SV=1	F	GO:0046872	metal ion binding
P0CJ79	ZN888_HUMANZinc finger 888 OS=Homo sapiens GN=ZNF888 PE=3 SV=1	P	GO:0006355	regulation of transcription, DNA-dependent
A0A024R172	PTGR1_HUMANProstaglandin reductase 1 OS=Homo sapiens GN=PTGR1 PE=1 SV=2	C	GO:0005737	cytoplasm
A0A024R172	PTGR1_HUMANProstaglandin reductase 1 OS=Homo sapiens GN=PTGR1 PE=1 SV=2	C	GO:0070062	extracellular vesicular exosome
A0A024R172	PTGR1_HUMANProstaglandin reductase 1 OS=Homo sapiens GN=PTGR1 PE=1 SV=2	F	GO:0008270	zinc ion binding
A0A024R172	PTGR1_HUMANProstaglandin reductase 1 OS=Homo sapiens GN=PTGR1 PE=1 SV=2	F	GO:0032440	2-alkenal reductase [NAD(P)] activity
A0A024R172	PTGR1_HUMANProstaglandin reductase 1 OS=Homo sapiens GN=PTGR1 PE=1 SV=2	F	GO:0047522	15-oxoprostaglandin 13-oxidase activity
A0A024R172	PTGR1_HUMANProstaglandin reductase 1 OS=Homo sapiens GN=PTGR1 PE=1 SV=2	P	GO:0006690	icosanoid metabolic process
A0A024R172	PTGR1_HUMANProstaglandin reductase 1 OS=Homo sapiens GN=PTGR1 PE=1 SV=2	P	GO:0033559	unsaturated fatty acid metabolic process
A0A024R172	PTGR1_HUMANProstaglandin reductase 1 OS=Homo sapiens GN=PTGR1 PE=1 SV=2	P	GO:0055114	oxidation-reduction process
B4DTK6	RRN3_HUMANRNA polymerase I-specific transcription initiation factor RRN3 OS=Homo sapiens GN=RRN3 PE=1 SV=1	C	GO:0005654	nucleoplasm
B4DTK6	RRN3_HUMANRNA polymerase I-specific transcription initiation factor RRN3 OS=Homo sapiens GN=RRN3 PE=1 SV=1	C	GO:0005730	nucleolus
B4DTK6	RRN3_HUMANRNA polymerase I-specific transcription initiation factor RRN3 OS=Homo sapiens GN=RRN3 PE=1 SV=1	F	GO:0001164	RNA polymerase I CORE element sequence-specific DNA binding
B4DTK6	RRN3_HUMANRNA polymerase I-specific transcription initiation factor RRN3 OS=Homo sapiens GN=RRN3 PE=1 SV=1	P	GO:0006361	transcription initiation from RNA polymerase I promoter
B4DTK6	RRN3_HUMANRNA polymerase I-specific transcription initiation factor RRN3 OS=Homo sapiens GN=RRN3 PE=1 SV=1	P	GO:0050794	regulation of cellular process
B4DE67	LICH_HUMANLysosomal acid lipase cholesteryl ester hydrolase OS=Homo sapiens GN=LIPA PE=1 SV=2	C	GO:0005764	lysosome
B4DE67	LICH_HUMANLysosomal acid lipase cholesteryl ester hydrolase OS=Homo sapiens GN=LIPA PE=1 SV=2	C	GO:0070062	extracellular vesicular exosome
B4DE67	LICH_HUMANLysosomal acid lipase cholesteryl ester hydrolase OS=Homo sapiens GN=LIPA PE=1 SV=2	F	GO:0004771	sterol esterase activity
B4DE67	LICH_HUMANLysosomal acid lipase cholesteryl ester hydrolase OS=Homo sapiens GN=LIPA PE=1 SV=2	P	GO:0044707	single-multicellular organism process
B4DE67	LICH_HUMANLysosomal acid lipase cholesteryl ester hydrolase OS=Homo sapiens GN=LIPA PE=1 SV=2	P	GO:0006699	bile acid biosynthetic process
Q8NEF9	SRFB1_HUMANSerum response factor-binding 1 OS=Homo sapiens GN=SRFBP1 PE=1 SV=1	C	GO:0044424	intracellular part
Q8NEF9	SRFB1_HUMANSerum response factor-binding 1 OS=Homo sapiens GN=SRFBP1 PE=1 SV=1	N	GO:0044822
Q8NEF9	SRFB1_HUMANSerum response factor-binding 1 OS=Homo sapiens GN=SRFBP1 PE=1 SV=1	P	GO:0010467	gene expression
Q8NEF9	SRFB1_HUMANSerum response factor-binding 1 OS=Homo sapiens GN=SRFBP1 PE=1 SV=1	P	GO:0016070	RNA metabolic process
I3L1D4	RFOX1_HUMANRNA binding fox-1 homolog 1 OS=Homo sapiens GN=RBFOX1 PE=1 SV=2	C	GO:0005802	trans-Golgi network
I3L1D4	RFOX1_HUMANRNA binding fox-1 homolog 1 OS=Homo sapiens GN=RBFOX1 PE=1 SV=2	C	GO:0044428	nuclear part
I3L1D4	RFOX1_HUMANRNA binding fox-1 homolog 1 OS=Homo sapiens GN=RBFOX1 PE=1 SV=2	F	GO:0000166	nucleotide binding
I3L1D4	RFOX1_HUMANRNA binding fox-1 homolog 1 OS=Homo sapiens GN=RBFOX1 PE=1 SV=2	F	GO:0003729	mRNA binding
I3L1D4	RFOX1_HUMANRNA binding fox-1 homolog 1 OS=Homo sapiens GN=RBFOX1 PE=1 SV=2	F	GO:0008022	protein C-terminus binding
I3L1D4	RFOX1_HUMANRNA binding fox-1 homolog 1 OS=Homo sapiens GN=RBFOX1 PE=1 SV=2	P	GO:0007399	nervous system development
I3L1D4	RFOX1_HUMANRNA binding fox-1 homolog 1 OS=Homo sapiens GN=RBFOX1 PE=1 SV=2	P	GO:0010604	positive regulation of macromolecule metabolic process
I3L1D4	RFOX1_HUMANRNA binding fox-1 homolog 1 OS=Homo sapiens GN=RBFOX1 PE=1 SV=2	P	GO:0010605	negative regulation of macromolecule metabolic process
I3L1D4	RFOX1_HUMANRNA binding fox-1 homolog 1 OS=Homo sapiens GN=RBFOX1 PE=1 SV=2	P	GO:0010608	posttranscriptional regulation of gene expression
I3L1D4	RFOX1_HUMANRNA binding fox-1 homolog 1 OS=Homo sapiens GN=RBFOX1 PE=1 SV=2	P	GO:0031325	positive regulation of cellular metabolic process
I3L1D4	RFOX1_HUMANRNA binding fox-1 homolog 1 OS=Homo sapiens GN=RBFOX1 PE=1 SV=2	P	GO:0044763	single-organism cellular process
I3L1D4	RFOX1_HUMANRNA binding fox-1 homolog 1 OS=Homo sapiens GN=RBFOX1 PE=1 SV=2	P	GO:0048024	regulation of mRNA splicing, via spliceosome
I3L1D4	RFOX1_HUMANRNA binding fox-1 homolog 1 OS=Homo sapiens GN=RBFOX1 PE=1 SV=2	P	GO:0050896	response to stimulus
I3L1D4	RFOX1_HUMANRNA binding fox-1 homolog 1 OS=Homo sapiens GN=RBFOX1 PE=1 SV=2	P	GO:0051173	positive regulation of nitrogen compound metabolic process
I3L1D4	RFOX1_HUMANRNA binding fox-1 homolog 1 OS=Homo sapiens GN=RBFOX1 PE=1 SV=2	P	GO:0051179	localization
I3L1D4	RFOX1_HUMANRNA binding fox-1 homolog 1 OS=Homo sapiens GN=RBFOX1 PE=1 SV=2	P	GO:2000112	regulation of cellular macromolecule biosynthetic process
F6TR53	H1BP3_HUMANHCLS1-binding 3 OS=Homo sapiens GN=HS1BP3 PE=1 SV=1	C	GO:0005739	mitochondrion
F6TR53	H1BP3_HUMANHCLS1-binding 3 OS=Homo sapiens GN=HS1BP3 PE=1 SV=1	C	GO:0005783	endoplasmic reticulum
F6TR53	H1BP3_HUMANHCLS1-binding 3 OS=Homo sapiens GN=HS1BP3 PE=1 SV=1	F	GO:0035091	phosphatidylinositol binding
F6TR53	H1BP3_HUMANHCLS1-binding 3 OS=Homo sapiens GN=HS1BP3 PE=1 SV=1	P	GO:0042981	regulation of apoptotic process
Q9H9Y2	RPF1_HUMANRibosome production factor 1 OS=Homo sapiens GN=RPF1 PE=1 SV=2	C	GO:0005730	nucleolus
Q9H9Y2	RPF1_HUMANRibosome production factor 1 OS=Homo sapiens GN=RPF1 PE=1 SV=2	C	GO:0030684	preribosome
Q9H9Y2	RPF1_HUMANRibosome production factor 1 OS=Homo sapiens GN=RPF1 PE=1 SV=2	F	GO:0005515	protein binding
Q9H9Y2	RPF1_HUMANRibosome production factor 1 OS=Homo sapiens GN=RPF1 PE=1 SV=2	F	GO:0019843	rRNA binding
Q9H9Y2	RPF1_HUMANRibosome production factor 1 OS=Homo sapiens GN=RPF1 PE=1 SV=2	N	GO:0044822
Q9H9Y2	RPF1_HUMANRibosome production factor 1 OS=Homo sapiens GN=RPF1 PE=1 SV=2	P	GO:0006364	rRNA processing
Q9H9Y2	RPF1_HUMANRibosome production factor 1 OS=Homo sapiens GN=RPF1 PE=1 SV=2	P	GO:0042273	ribosomal large subunit biogenesis
O95478	NSA2_HUMANRibosome biogenesis NSA2 homolog OS=Homo sapiens GN=NSA2 PE=1 SV=1	C	GO:0005730	nucleolus
O95478	NSA2_HUMANRibosome biogenesis NSA2 homolog OS=Homo sapiens GN=NSA2 PE=1 SV=1	C	GO:0030529	ribonucleoprotein complex
O95478	NSA2_HUMANRibosome biogenesis NSA2 homolog OS=Homo sapiens GN=NSA2 PE=1 SV=1	N	GO:0044822
O95478	NSA2_HUMANRibosome biogenesis NSA2 homolog OS=Homo sapiens GN=NSA2 PE=1 SV=1	P	GO:0006364	rRNA processing
B3KM35	B4GT4_HUMANBeta-1,4-galactosyltransferase 4 OS=Homo sapiens GN=B4GALT4 PE=1 SV=1	C	GO:0000139	Golgi membrane
B3KM35	B4GT4_HUMANBeta-1,4-galactosyltransferase 4 OS=Homo sapiens GN=B4GALT4 PE=1 SV=1	C	GO:0016021	integral to membrane
B3KM35	B4GT4_HUMANBeta-1,4-galactosyltransferase 4 OS=Homo sapiens GN=B4GALT4 PE=1 SV=1	C	GO:0071944	cell periphery
B3KM35	B4GT4_HUMANBeta-1,4-galactosyltransferase 4 OS=Homo sapiens GN=B4GALT4 PE=1 SV=1	F	GO:0003831	beta-N-acetylglucosaminylglycopeptide beta-1,4-galactosyltransferase activity
B3KM35	B4GT4_HUMANBeta-1,4-galactosyltransferase 4 OS=Homo sapiens GN=B4GALT4 PE=1 SV=1	F	GO:0005515	protein binding
B3KM35	B4GT4_HUMANBeta-1,4-galactosyltransferase 4 OS=Homo sapiens GN=B4GALT4 PE=1 SV=1	P	GO:0005975	carbohydrate metabolic process
B3KM35	B4GT4_HUMANBeta-1,4-galactosyltransferase 4 OS=Homo sapiens GN=B4GALT4 PE=1 SV=1	P	GO:0006643	membrane lipid metabolic process
B3KM35	B4GT4_HUMANBeta-1,4-galactosyltransferase 4 OS=Homo sapiens GN=B4GALT4 PE=1 SV=1	P	GO:0009100	glycoprotein metabolic process
B3KM35	B4GT4_HUMANBeta-1,4-galactosyltransferase 4 OS=Homo sapiens GN=B4GALT4 PE=1 SV=1	P	GO:0018146	keratan sulfate biosynthetic process
B3KM35	B4GT4_HUMANBeta-1,4-galactosyltransferase 4 OS=Homo sapiens GN=B4GALT4 PE=1 SV=1	P	GO:0050789	regulation of biological process
P07477	TRY1_HUMANTrypsin-1 OS=Homo sapiens GN=PRSS1 PE=1 SV=1	C	GO:0031012	extracellular matrix
P07477	TRY1_HUMANTrypsin-1 OS=Homo sapiens GN=PRSS1 PE=1 SV=1	C	GO:0043231	intracellular membrane-bounded organelle
P07477	TRY1_HUMANTrypsin-1 OS=Homo sapiens GN=PRSS1 PE=1 SV=1	C	GO:0070062	extracellular vesicular exosome
P07477	TRY1_HUMANTrypsin-1 OS=Homo sapiens GN=PRSS1 PE=1 SV=1	C	GO:0072562	blood microparticle
P07477	TRY1_HUMANTrypsin-1 OS=Homo sapiens GN=PRSS1 PE=1 SV=1	F	GO:0004252	serine-type endopeptidase activity
P07477	TRY1_HUMANTrypsin-1 OS=Homo sapiens GN=PRSS1 PE=1 SV=1	F	GO:0005509	calcium ion binding
P07477	TRY1_HUMANTrypsin-1 OS=Homo sapiens GN=PRSS1 PE=1 SV=1	F	GO:0005515	protein binding
P07477	TRY1_HUMANTrypsin-1 OS=Homo sapiens GN=PRSS1 PE=1 SV=1	P	GO:0009235	cobalamin metabolic process
P07477	TRY1_HUMANTrypsin-1 OS=Homo sapiens GN=PRSS1 PE=1 SV=1	P	GO:0022617	extracellular matrix disassembly
P07477	TRY1_HUMANTrypsin-1 OS=Homo sapiens GN=PRSS1 PE=1 SV=1	P	GO:0030307	positive regulation of cell growth
P07477	TRY1_HUMANTrypsin-1 OS=Homo sapiens GN=PRSS1 PE=1 SV=1	P	GO:0030574	collagen catabolic process
P07477	TRY1_HUMANTrypsin-1 OS=Homo sapiens GN=PRSS1 PE=1 SV=1	P	GO:0031638	zymogen activation
P07477	TRY1_HUMANTrypsin-1 OS=Homo sapiens GN=PRSS1 PE=1 SV=1	P	GO:0043542	endothelial cell migration
P07477	TRY1_HUMANTrypsin-1 OS=Homo sapiens GN=PRSS1 PE=1 SV=1	P	GO:0045785	positive regulation of cell adhesion
P07477	TRY1_HUMANTrypsin-1 OS=Homo sapiens GN=PRSS1 PE=1 SV=1	P	GO:0048856	anatomical structure development
A0A0S2Z5K6	SIL1_HUMANNucleotide exchange factor SIL1 OS=Homo sapiens GN=SIL1 PE=1 SV=1	F	GO:0005515	protein binding
H0YNP9	MESH1_HUMANGuanosine-3 ,5 -bis(diphosphate) 3 -pyrophosphohydrolase MESH1 OS=Homo sapiens GN=HDDC3 PE=1 SV=3	F	GO:0005515	protein binding
H0YNP9	MESH1_HUMANGuanosine-3 ,5 -bis(diphosphate) 3 -pyrophosphohydrolase MESH1 OS=Homo sapiens GN=HDDC3 PE=1 SV=3	F	GO:0016787	hydrolase activity
Q53EY9	FBX22_HUMANF-box only 22 OS=Homo sapiens GN=FBXO22 PE=1 SV=1	F	GO:0004842	ubiquitin-protein ligase activity
Q53EY9	FBX22_HUMANF-box only 22 OS=Homo sapiens GN=FBXO22 PE=1 SV=1	F	GO:0005515	protein binding
Q53EY9	FBX22_HUMANF-box only 22 OS=Homo sapiens GN=FBXO22 PE=1 SV=1	P	GO:0006511	ubiquitin-dependent protein catabolic process
Q53EY9	FBX22_HUMANF-box only 22 OS=Homo sapiens GN=FBXO22 PE=1 SV=1	P	GO:0016567	protein ubiquitination
E5RJK7	LYRM2_HUMANLYR motif-containing 2 OS=Homo sapiens GN=LYRM2 PE=1 SV=1	F	GO:0005515	protein binding
B3KNS8	SURF6_HUMANSurfeit locus 6 OS=Homo sapiens GN=SURF6 PE=1 SV=3	C	GO:0005730	nucleolus
B3KNS8	SURF6_HUMANSurfeit locus 6 OS=Homo sapiens GN=SURF6 PE=1 SV=3	N	GO:0044822
A0A0A0MRW6	NOL6_HUMANNucleolar 6 OS=Homo sapiens GN=NOL6 PE=1 SV=2	C	GO:0005654	nucleoplasm
A0A0A0MRW6	NOL6_HUMANNucleolar 6 OS=Homo sapiens GN=NOL6 PE=1 SV=2	C	GO:0005694	chromosome
A0A0A0MRW6	NOL6_HUMANNucleolar 6 OS=Homo sapiens GN=NOL6 PE=1 SV=2	C	GO:0005730	nucleolus
A0A0A0MRW6	NOL6_HUMANNucleolar 6 OS=Homo sapiens GN=NOL6 PE=1 SV=2	C	GO:0005739	mitochondrion
A0A0A0MRW6	NOL6_HUMANNucleolar 6 OS=Homo sapiens GN=NOL6 PE=1 SV=2	C	GO:0030684	preribosome
A0A0A0MRW6	NOL6_HUMANNucleolar 6 OS=Homo sapiens GN=NOL6 PE=1 SV=2	C	GO:0043234	protein complex
A0A0A0MRW6	NOL6_HUMANNucleolar 6 OS=Homo sapiens GN=NOL6 PE=1 SV=2	F	GO:0005515	protein binding
A0A0A0MRW6	NOL6_HUMANNucleolar 6 OS=Homo sapiens GN=NOL6 PE=1 SV=2	N	GO:0044822
A0A0A0MRW6	NOL6_HUMANNucleolar 6 OS=Homo sapiens GN=NOL6 PE=1 SV=2	P	GO:0006364	rRNA processing
F6KPG5	ALBU_HUMANSerum albumin OS=Homo sapiens GN=ALB PE=1 SV=2	C	GO:0005634	nucleus
F6KPG5	ALBU_HUMANSerum albumin OS=Homo sapiens GN=ALB PE=1 SV=2	C	GO:0005783	endoplasmic reticulum
F6KPG5	ALBU_HUMANSerum albumin OS=Homo sapiens GN=ALB PE=1 SV=2	C	GO:0005794	Golgi apparatus
F6KPG5	ALBU_HUMANSerum albumin OS=Homo sapiens GN=ALB PE=1 SV=2	C	GO:0031093	platelet alpha granule lumen
F6KPG5	ALBU_HUMANSerum albumin OS=Homo sapiens GN=ALB PE=1 SV=2	C	GO:0070062	extracellular vesicular exosome
F6KPG5	ALBU_HUMANSerum albumin OS=Homo sapiens GN=ALB PE=1 SV=2	C	GO:0072562	blood microparticle
F6KPG5	ALBU_HUMANSerum albumin OS=Homo sapiens GN=ALB PE=1 SV=2	F	GO:0003677	DNA binding
F6KPG5	ALBU_HUMANSerum albumin OS=Homo sapiens GN=ALB PE=1 SV=2	F	GO:0005504	fatty acid binding
F6KPG5	ALBU_HUMANSerum albumin OS=Homo sapiens GN=ALB PE=1 SV=2	F	GO:0008144	drug binding
F6KPG5	ALBU_HUMANSerum albumin OS=Homo sapiens GN=ALB PE=1 SV=2	F	GO:0015643	toxic substance binding
F6KPG5	ALBU_HUMANSerum albumin OS=Homo sapiens GN=ALB PE=1 SV=2	F	GO:0019825	oxygen binding
F6KPG5	ALBU_HUMANSerum albumin OS=Homo sapiens GN=ALB PE=1 SV=2	F	GO:0030170	pyridoxal phosphate binding
F6KPG5	ALBU_HUMANSerum albumin OS=Homo sapiens GN=ALB PE=1 SV=2	F	GO:0042802	identical protein binding
F6KPG5	ALBU_HUMANSerum albumin OS=Homo sapiens GN=ALB PE=1 SV=2	F	GO:0046872	metal ion binding
F6KPG5	ALBU_HUMANSerum albumin OS=Homo sapiens GN=ALB PE=1 SV=2	F	GO:0051087	chaperone binding
F6KPG5	ALBU_HUMANSerum albumin OS=Homo sapiens GN=ALB PE=1 SV=2	P	GO:0001895	retina homeostasis
F6KPG5	ALBU_HUMANSerum albumin OS=Homo sapiens GN=ALB PE=1 SV=2	P	GO:0002576	platelet degranulation
F6KPG5	ALBU_HUMANSerum albumin OS=Homo sapiens GN=ALB PE=1 SV=2	P	GO:0006898	receptor-mediated endocytosis
F6KPG5	ALBU_HUMANSerum albumin OS=Homo sapiens GN=ALB PE=1 SV=2	P	GO:0009267	cellular response to starvation
F6KPG5	ALBU_HUMANSerum albumin OS=Homo sapiens GN=ALB PE=1 SV=2	P	GO:0015721	bile acid and bile salt transport
F6KPG5	ALBU_HUMANSerum albumin OS=Homo sapiens GN=ALB PE=1 SV=2	P	GO:0019836	hemolysis by symbiont of host erythrocytes
F6KPG5	ALBU_HUMANSerum albumin OS=Homo sapiens GN=ALB PE=1 SV=2	P	GO:0042157	lipoprotein metabolic process
F6KPG5	ALBU_HUMANSerum albumin OS=Homo sapiens GN=ALB PE=1 SV=2	P	GO:0042221	response to chemical stimulus
F6KPG5	ALBU_HUMANSerum albumin OS=Homo sapiens GN=ALB PE=1 SV=2	P	GO:0043066	negative regulation of apoptotic process
F6KPG5	ALBU_HUMANSerum albumin OS=Homo sapiens GN=ALB PE=1 SV=2	P	GO:0043252	sodium-independent organic anion transport
F6KPG5	ALBU_HUMANSerum albumin OS=Homo sapiens GN=ALB PE=1 SV=2	P	GO:0051659	maintenance of mitochondrion location
F6KPG5	ALBU_HUMANSerum albumin OS=Homo sapiens GN=ALB PE=1 SV=2	P	GO:0006955	immune response
F6KPG5	ALBU_HUMANSerum albumin OS=Homo sapiens GN=ALB PE=1 SV=2	C	GO:0019814	immunoglobulin complex
Q15125	EBP_HUMAN3-beta-hydroxysteroid-Delta(8),Delta(7)-isomerase OS=Homo sapiens GN=EBP PE=1 SV=3	C	GO:0005789	endoplasmic reticulum membrane
Q15125	EBP_HUMAN3-beta-hydroxysteroid-Delta(8),Delta(7)-isomerase OS=Homo sapiens GN=EBP PE=1 SV=3	C	GO:0005887	integral to plasma membrane
Q15125	EBP_HUMAN3-beta-hydroxysteroid-Delta(8),Delta(7)-isomerase OS=Homo sapiens GN=EBP PE=1 SV=3	F	GO:0004769	steroid delta-isomerase activity
Q15125	EBP_HUMAN3-beta-hydroxysteroid-Delta(8),Delta(7)-isomerase OS=Homo sapiens GN=EBP PE=1 SV=3	F	GO:0004888	transmembrane signaling receptor activity
Q15125	EBP_HUMAN3-beta-hydroxysteroid-Delta(8),Delta(7)-isomerase OS=Homo sapiens GN=EBP PE=1 SV=3	F	GO:0015238	drug transmembrane transporter activity
Q15125	EBP_HUMAN3-beta-hydroxysteroid-Delta(8),Delta(7)-isomerase OS=Homo sapiens GN=EBP PE=1 SV=3	F	GO:0047750	cholestenol delta-isomerase activity
Q15125	EBP_HUMAN3-beta-hydroxysteroid-Delta(8),Delta(7)-isomerase OS=Homo sapiens GN=EBP PE=1 SV=3	P	GO:0001501	skeletal system development
Q15125	EBP_HUMAN3-beta-hydroxysteroid-Delta(8),Delta(7)-isomerase OS=Homo sapiens GN=EBP PE=1 SV=3	P	GO:0033489	cholesterol biosynthetic process via desmosterol
Q15125	EBP_HUMAN3-beta-hydroxysteroid-Delta(8),Delta(7)-isomerase OS=Homo sapiens GN=EBP PE=1 SV=3	P	GO:0033490	cholesterol biosynthetic process via lathosterol
Q15125	EBP_HUMAN3-beta-hydroxysteroid-Delta(8),Delta(7)-isomerase OS=Homo sapiens GN=EBP PE=1 SV=3	P	GO:0008207	C21-steroid hormone metabolic process
Q15125	EBP_HUMAN3-beta-hydroxysteroid-Delta(8),Delta(7)-isomerase OS=Homo sapiens GN=EBP PE=1 SV=3	P	GO:0008209	androgen metabolic process
Q15125	EBP_HUMAN3-beta-hydroxysteroid-Delta(8),Delta(7)-isomerase OS=Homo sapiens GN=EBP PE=1 SV=3	P	GO:0008210	estrogen metabolic process
Q15125	EBP_HUMAN3-beta-hydroxysteroid-Delta(8),Delta(7)-isomerase OS=Homo sapiens GN=EBP PE=1 SV=3	P	GO:0007165	signal transduction
Q15125	EBP_HUMAN3-beta-hydroxysteroid-Delta(8),Delta(7)-isomerase OS=Homo sapiens GN=EBP PE=1 SV=3	P	GO:0015893	drug transport
A0A1B0GVI7	AHR_HUMANAryl hydrocarbon receptor OS=Homo sapiens GN=AHR PE=1 SV=2	C	GO:0005654	nucleoplasm
A0A1B0GVI7	AHR_HUMANAryl hydrocarbon receptor OS=Homo sapiens GN=AHR PE=1 SV=2	C	GO:0005667	transcription factor complex
A0A1B0GVI7	AHR_HUMANAryl hydrocarbon receptor OS=Homo sapiens GN=AHR PE=1 SV=2	C	GO:0034752	cytosolic aryl hydrocarbon receptor complex
A0A1B0GVI7	AHR_HUMANAryl hydrocarbon receptor OS=Homo sapiens GN=AHR PE=1 SV=2	F	GO:0004874	aryl hydrocarbon receptor activity
A0A1B0GVI7	AHR_HUMANAryl hydrocarbon receptor OS=Homo sapiens GN=AHR PE=1 SV=2	F	GO:0004879	ligand-activated sequence-specific DNA binding RNA polymerase II transcription factor activity
A0A1B0GVI7	AHR_HUMANAryl hydrocarbon receptor OS=Homo sapiens GN=AHR PE=1 SV=2	F	GO:0008134	transcription factor binding
A0A1B0GVI7	AHR_HUMANAryl hydrocarbon receptor OS=Homo sapiens GN=AHR PE=1 SV=2	F	GO:0035326	enhancer binding
A0A1B0GVI7	AHR_HUMANAryl hydrocarbon receptor OS=Homo sapiens GN=AHR PE=1 SV=2	F	GO:0046982	protein heterodimerization activity
A0A1B0GVI7	AHR_HUMANAryl hydrocarbon receptor OS=Homo sapiens GN=AHR PE=1 SV=2	F	GO:0051879	Hsp90 protein binding
A0A1B0GVI7	AHR_HUMANAryl hydrocarbon receptor OS=Homo sapiens GN=AHR PE=1 SV=2	P	GO:0001568	blood vessel development
A0A1B0GVI7	AHR_HUMANAryl hydrocarbon receptor OS=Homo sapiens GN=AHR PE=1 SV=2	P	GO:0006805	xenobiotic metabolic process
A0A1B0GVI7	AHR_HUMANAryl hydrocarbon receptor OS=Homo sapiens GN=AHR PE=1 SV=2	P	GO:0006915	apoptotic process
A0A1B0GVI7	AHR_HUMANAryl hydrocarbon receptor OS=Homo sapiens GN=AHR PE=1 SV=2	P	GO:0006950	response to stress
A0A1B0GVI7	AHR_HUMANAryl hydrocarbon receptor OS=Homo sapiens GN=AHR PE=1 SV=2	P	GO:0009628	response to abiotic stimulus
A0A1B0GVI7	AHR_HUMANAryl hydrocarbon receptor OS=Homo sapiens GN=AHR PE=1 SV=2	P	GO:0009636	response to toxic substance
A0A1B0GVI7	AHR_HUMANAryl hydrocarbon receptor OS=Homo sapiens GN=AHR PE=1 SV=2	P	GO:0009719	response to endogenous stimulus
A0A1B0GVI7	AHR_HUMANAryl hydrocarbon receptor OS=Homo sapiens GN=AHR PE=1 SV=2	P	GO:0014070	response to organic cyclic compound
A0A1B0GVI7	AHR_HUMANAryl hydrocarbon receptor OS=Homo sapiens GN=AHR PE=1 SV=2	P	GO:0022414	reproductive process
A0A1B0GVI7	AHR_HUMANAryl hydrocarbon receptor OS=Homo sapiens GN=AHR PE=1 SV=2	P	GO:0030888	regulation of B cell proliferation
A0A1B0GVI7	AHR_HUMANAryl hydrocarbon receptor OS=Homo sapiens GN=AHR PE=1 SV=2	P	GO:0033993	response to lipid
A0A1B0GVI7	AHR_HUMANAryl hydrocarbon receptor OS=Homo sapiens GN=AHR PE=1 SV=2	P	GO:0045944	positive regulation of transcription from RNA polymerase II promoter
A0A1B0GVI7	AHR_HUMANAryl hydrocarbon receptor OS=Homo sapiens GN=AHR PE=1 SV=2	P	GO:0048511	rhythmic process
A0A1B0GVI7	AHR_HUMANAryl hydrocarbon receptor OS=Homo sapiens GN=AHR PE=1 SV=2	P	GO:0048513	organ development
A0A1B0GVI7	AHR_HUMANAryl hydrocarbon receptor OS=Homo sapiens GN=AHR PE=1 SV=2	P	GO:0051239	regulation of multicellular organismal process
A0A1B0GVI7	AHR_HUMANAryl hydrocarbon receptor OS=Homo sapiens GN=AHR PE=1 SV=2	P	GO:0065008	regulation of biological quality
A0A1B0GVI7	AHR_HUMANAryl hydrocarbon receptor OS=Homo sapiens GN=AHR PE=1 SV=2	P	GO:0071310	cellular response to organic substance
A0A1B0GVI7	AHR_HUMANAryl hydrocarbon receptor OS=Homo sapiens GN=AHR PE=1 SV=2	P	GO:1901700	response to oxygen-containing compound
A0A1B0GVI7	AHR_HUMANAryl hydrocarbon receptor OS=Homo sapiens GN=AHR PE=1 SV=2	N	GO:1903507
A0A1B0GVI7	AHR_HUMANAryl hydrocarbon receptor OS=Homo sapiens GN=AHR PE=1 SV=2	P	GO:0007165	signal transduction
Q6FHK1	RM28_HUMAN39S ribosomal mitochondrial OS=Homo sapiens GN=MRPL28 PE=1 SV=4	C	GO:0005743	mitochondrial inner membrane
Q6FHK1	RM28_HUMAN39S ribosomal mitochondrial OS=Homo sapiens GN=MRPL28 PE=1 SV=4	C	GO:0005761	mitochondrial ribosome
Q6FHK1	RM28_HUMAN39S ribosomal mitochondrial OS=Homo sapiens GN=MRPL28 PE=1 SV=4	F	GO:0003735	structural constituent of ribosome
Q6FHK1	RM28_HUMAN39S ribosomal mitochondrial OS=Homo sapiens GN=MRPL28 PE=1 SV=4	F	GO:0005515	protein binding
Q6FHK1	RM28_HUMAN39S ribosomal mitochondrial OS=Homo sapiens GN=MRPL28 PE=1 SV=4	N	GO:0044822
Q6FHK1	RM28_HUMAN39S ribosomal mitochondrial OS=Homo sapiens GN=MRPL28 PE=1 SV=4	P	GO:0070125	mitochondrial translational elongation
Q6FHK1	RM28_HUMAN39S ribosomal mitochondrial OS=Homo sapiens GN=MRPL28 PE=1 SV=4	P	GO:0070126	mitochondrial translational termination
Q6FHK1	RM28_HUMAN39S ribosomal mitochondrial OS=Homo sapiens GN=MRPL28 PE=1 SV=4	P	GO:0042254	ribosome biogenesis
B4DE48	SNX17_HUMANSorting nexin-17 OS=Homo sapiens GN=SNX17 PE=1 SV=1	C	GO:0005769	early endosome
B4DE48	SNX17_HUMANSorting nexin-17 OS=Homo sapiens GN=SNX17 PE=1 SV=1	C	GO:0005794	Golgi apparatus
B4DE48	SNX17_HUMANSorting nexin-17 OS=Homo sapiens GN=SNX17 PE=1 SV=1	C	GO:0005829	cytosol
B4DE48	SNX17_HUMANSorting nexin-17 OS=Homo sapiens GN=SNX17 PE=1 SV=1	C	GO:0010008	endosome membrane
B4DE48	SNX17_HUMANSorting nexin-17 OS=Homo sapiens GN=SNX17 PE=1 SV=1	C	GO:0016023	cytoplasmic membrane-bounded vesicle
B4DE48	SNX17_HUMANSorting nexin-17 OS=Homo sapiens GN=SNX17 PE=1 SV=1	C	GO:0043234	protein complex
B4DE48	SNX17_HUMANSorting nexin-17 OS=Homo sapiens GN=SNX17 PE=1 SV=1	F	GO:0008022	protein C-terminus binding
B4DE48	SNX17_HUMANSorting nexin-17 OS=Homo sapiens GN=SNX17 PE=1 SV=1	F	GO:0035091	phosphatidylinositol binding
B4DE48	SNX17_HUMANSorting nexin-17 OS=Homo sapiens GN=SNX17 PE=1 SV=1	F	GO:0050750	low-density lipoprotein particle receptor binding
B4DE48	SNX17_HUMANSorting nexin-17 OS=Homo sapiens GN=SNX17 PE=1 SV=1	P	GO:0006707	cholesterol catabolic process
B4DE48	SNX17_HUMANSorting nexin-17 OS=Homo sapiens GN=SNX17 PE=1 SV=1	P	GO:0007165	signal transduction
B4DE48	SNX17_HUMANSorting nexin-17 OS=Homo sapiens GN=SNX17 PE=1 SV=1	P	GO:0015031	protein transport
B4DE48	SNX17_HUMANSorting nexin-17 OS=Homo sapiens GN=SNX17 PE=1 SV=1	P	GO:0016192	vesicle-mediated transport
B4DE48	SNX17_HUMANSorting nexin-17 OS=Homo sapiens GN=SNX17 PE=1 SV=1	P	GO:0016197	endosomal transport
B4DE48	SNX17_HUMANSorting nexin-17 OS=Homo sapiens GN=SNX17 PE=1 SV=1	P	GO:0046907	intracellular transport
Q9BWT3	PAPOG_HUMANPoly(A) polymerase gamma OS=Homo sapiens GN=PAPOLG PE=1 SV=2	C	GO:0005654	nucleoplasm
Q9BWT3	PAPOG_HUMANPoly(A) polymerase gamma OS=Homo sapiens GN=PAPOLG PE=1 SV=2	C	GO:0005737	cytoplasm
Q9BWT3	PAPOG_HUMANPoly(A) polymerase gamma OS=Homo sapiens GN=PAPOLG PE=1 SV=2	C	GO:0016020	membrane
Q9BWT3	PAPOG_HUMANPoly(A) polymerase gamma OS=Homo sapiens GN=PAPOLG PE=1 SV=2	F	GO:0003723	RNA binding
Q9BWT3	PAPOG_HUMANPoly(A) polymerase gamma OS=Homo sapiens GN=PAPOLG PE=1 SV=2	F	GO:0004652	polynucleotide adenylyltransferase activity
Q9BWT3	PAPOG_HUMANPoly(A) polymerase gamma OS=Homo sapiens GN=PAPOLG PE=1 SV=2	F	GO:0046872	metal ion binding
Q9BWT3	PAPOG_HUMANPoly(A) polymerase gamma OS=Homo sapiens GN=PAPOLG PE=1 SV=2	P	GO:0031124	mRNA 3'-end processing
Q9BWT3	PAPOG_HUMANPoly(A) polymerase gamma OS=Homo sapiens GN=PAPOLG PE=1 SV=2	P	GO:0043631	RNA polyadenylation
Q6N075	MFSD5_HUMANMolybdate-anion transporter OS=Homo sapiens GN=MFSD5 PE=1 SV=2	C	GO:0016021	integral to membrane
Q6N075	MFSD5_HUMANMolybdate-anion transporter OS=Homo sapiens GN=MFSD5 PE=1 SV=2	F	GO:0005515	protein binding
Q6N075	MFSD5_HUMANMolybdate-anion transporter OS=Homo sapiens GN=MFSD5 PE=1 SV=2	F	GO:0015098	molybdate ion transmembrane transporter activity
Q6N075	MFSD5_HUMANMolybdate-anion transporter OS=Homo sapiens GN=MFSD5 PE=1 SV=2	P	GO:0015689	molybdate ion transport
O00458	IFRD1_HUMANInterferon-related developmental regulator 1 OS=Homo sapiens GN=IFRD1 PE=1 SV=4	F	GO:0005488	binding
O00458	IFRD1_HUMANInterferon-related developmental regulator 1 OS=Homo sapiens GN=IFRD1 PE=1 SV=4	P	GO:0007518	myoblast fate determination
F1JVV5	EWS_HUMANRNA-binding EWS OS=Homo sapiens GN=EWSR1 PE=1 SV=1	C	GO:0000785	chromatin
F1JVV5	EWS_HUMANRNA-binding EWS OS=Homo sapiens GN=EWSR1 PE=1 SV=1	C	GO:0005654	nucleoplasm
F1JVV5	EWS_HUMANRNA-binding EWS OS=Homo sapiens GN=EWSR1 PE=1 SV=1	C	GO:0005730	nucleolus
F1JVV5	EWS_HUMANRNA-binding EWS OS=Homo sapiens GN=EWSR1 PE=1 SV=1	C	GO:0005737	cytoplasm
F1JVV5	EWS_HUMANRNA-binding EWS OS=Homo sapiens GN=EWSR1 PE=1 SV=1	N	GO:1990590
F1JVV5	EWS_HUMANRNA-binding EWS OS=Homo sapiens GN=EWSR1 PE=1 SV=1	F	GO:0000977	RNA polymerase II regulatory region sequence-specific DNA binding
F1JVV5	EWS_HUMANRNA-binding EWS OS=Homo sapiens GN=EWSR1 PE=1 SV=1	F	GO:0001228	RNA polymerase II transcription regulatory region sequence-specific DNA binding transcription factor activity involved in positive regulation of transcription
F1JVV5	EWS_HUMANRNA-binding EWS OS=Homo sapiens GN=EWSR1 PE=1 SV=1	F	GO:0008134	transcription factor binding
F1JVV5	EWS_HUMANRNA-binding EWS OS=Homo sapiens GN=EWSR1 PE=1 SV=1	F	GO:0042802	identical protein binding
F1JVV5	EWS_HUMANRNA-binding EWS OS=Homo sapiens GN=EWSR1 PE=1 SV=1	N	GO:0044822
F1JVV5	EWS_HUMANRNA-binding EWS OS=Homo sapiens GN=EWSR1 PE=1 SV=1	F	GO:0046982	protein heterodimerization activity
F1JVV5	EWS_HUMANRNA-binding EWS OS=Homo sapiens GN=EWSR1 PE=1 SV=1	P	GO:0007165	signal transduction
F1JVV5	EWS_HUMANRNA-binding EWS OS=Homo sapiens GN=EWSR1 PE=1 SV=1	P	GO:0009719	response to endogenous stimulus
F1JVV5	EWS_HUMANRNA-binding EWS OS=Homo sapiens GN=EWSR1 PE=1 SV=1	P	GO:0010629	negative regulation of gene expression
F1JVV5	EWS_HUMANRNA-binding EWS OS=Homo sapiens GN=EWSR1 PE=1 SV=1	P	GO:0016043	cellular component organization
F1JVV5	EWS_HUMANRNA-binding EWS OS=Homo sapiens GN=EWSR1 PE=1 SV=1	P	GO:0045595	regulation of cell differentiation
F1JVV5	EWS_HUMANRNA-binding EWS OS=Homo sapiens GN=EWSR1 PE=1 SV=1	P	GO:0045944	positive regulation of transcription from RNA polymerase II promoter
F1JVV5	EWS_HUMANRNA-binding EWS OS=Homo sapiens GN=EWSR1 PE=1 SV=1	P	GO:0048523	negative regulation of cellular process
F1JVV5	EWS_HUMANRNA-binding EWS OS=Homo sapiens GN=EWSR1 PE=1 SV=1	P	GO:0048699	generation of neurons
F1JVV5	EWS_HUMANRNA-binding EWS OS=Homo sapiens GN=EWSR1 PE=1 SV=1	P	GO:0051094	positive regulation of developmental process
F1JVV5	EWS_HUMANRNA-binding EWS OS=Homo sapiens GN=EWSR1 PE=1 SV=1	P	GO:0051240	positive regulation of multicellular organismal process
F1JVV5	EWS_HUMANRNA-binding EWS OS=Homo sapiens GN=EWSR1 PE=1 SV=1	P	GO:0071310	cellular response to organic substance
A0A024R8I8	SAPC2_HUMANSuppressor APC domain-containing 2 OS=Homo sapiens GN=SAPCD2 PE=1 SV=2	C	GO:0005730	nucleolus
A0A024R8I8	SAPC2_HUMANSuppressor APC domain-containing 2 OS=Homo sapiens GN=SAPCD2 PE=1 SV=2	C	GO:0005737	cytoplasm
B1ALI9	TXNIP_HUMANThioredoxin-interacting OS=Homo sapiens GN=TXNIP PE=1 SV=1	C	GO:0005829	cytosol
B1ALI9	TXNIP_HUMANThioredoxin-interacting OS=Homo sapiens GN=TXNIP PE=1 SV=1	C	GO:0043231	intracellular membrane-bounded organelle
B1ALI9	TXNIP_HUMANThioredoxin-interacting OS=Homo sapiens GN=TXNIP PE=1 SV=1	F	GO:0031625	ubiquitin protein ligase binding
B1ALI9	TXNIP_HUMANThioredoxin-interacting OS=Homo sapiens GN=TXNIP PE=1 SV=1	P	GO:0019222	regulation of metabolic process
B1ALI9	TXNIP_HUMANThioredoxin-interacting OS=Homo sapiens GN=TXNIP PE=1 SV=1	P	GO:0030216	keratinocyte differentiation
B1ALI9	TXNIP_HUMANThioredoxin-interacting OS=Homo sapiens GN=TXNIP PE=1 SV=1	P	GO:0051782	negative regulation of cell division
B1ALI9	TXNIP_HUMANThioredoxin-interacting OS=Homo sapiens GN=TXNIP PE=1 SV=1	P	GO:0071228	cellular response to tumor cell
B1ALI9	TXNIP_HUMANThioredoxin-interacting OS=Homo sapiens GN=TXNIP PE=1 SV=1	P	GO:1901700	response to oxygen-containing compound
B3KQT6	TSN13_HUMANTetraspanin-13 OS=Homo sapiens GN=TSPAN13 PE=2 SV=1	C	GO:0005773	vacuole
B3KQT6	TSN13_HUMANTetraspanin-13 OS=Homo sapiens GN=TSPAN13 PE=2 SV=1	C	GO:0005887	integral to plasma membrane
B3KQT6	TSN13_HUMANTetraspanin-13 OS=Homo sapiens GN=TSPAN13 PE=2 SV=1	P	GO:0044763	single-organism cellular process
B3KQT6	TSN13_HUMANTetraspanin-13 OS=Homo sapiens GN=TSPAN13 PE=2 SV=1	P	GO:0048518	positive regulation of biological process
B3KQT6	TSN13_HUMANTetraspanin-13 OS=Homo sapiens GN=TSPAN13 PE=2 SV=1	P	GO:0050794	regulation of cellular process
B3KQT6	TSN13_HUMANTetraspanin-13 OS=Homo sapiens GN=TSPAN13 PE=2 SV=1	P	GO:0051049	regulation of transport
B3KQT6	TSN13_HUMANTetraspanin-13 OS=Homo sapiens GN=TSPAN13 PE=2 SV=1	P	GO:0051716	cellular response to stimulus
D6RBJ7	VTDB_HUMANVitamin D-binding OS=Homo sapiens GN=GC PE=1 SV=1	C	GO:0005829	cytosol
D6RBJ7	VTDB_HUMANVitamin D-binding OS=Homo sapiens GN=GC PE=1 SV=1	C	GO:0043202	lysosomal lumen
D6RBJ7	VTDB_HUMANVitamin D-binding OS=Homo sapiens GN=GC PE=1 SV=1	C	GO:0070062	extracellular vesicular exosome
D6RBJ7	VTDB_HUMANVitamin D-binding OS=Homo sapiens GN=GC PE=1 SV=1	C	GO:0072562	blood microparticle
D6RBJ7	VTDB_HUMANVitamin D-binding OS=Homo sapiens GN=GC PE=1 SV=1	F	GO:0003779	actin binding
D6RBJ7	VTDB_HUMANVitamin D-binding OS=Homo sapiens GN=GC PE=1 SV=1	F	GO:0051183	vitamin transporter activity
D6RBJ7	VTDB_HUMANVitamin D-binding OS=Homo sapiens GN=GC PE=1 SV=1	F	GO:1902118	calcidiol binding
D6RBJ7	VTDB_HUMANVitamin D-binding OS=Homo sapiens GN=GC PE=1 SV=1	P	GO:0042221	response to chemical stimulus
D6RBJ7	VTDB_HUMANVitamin D-binding OS=Homo sapiens GN=GC PE=1 SV=1	P	GO:0042359	vitamin D metabolic process
D6RBJ7	VTDB_HUMANVitamin D-binding OS=Homo sapiens GN=GC PE=1 SV=1	P	GO:0048513	organ development
D6RBJ7	VTDB_HUMANVitamin D-binding OS=Homo sapiens GN=GC PE=1 SV=1	P	GO:0051180	vitamin transport
D6RBJ7	VTDB_HUMANVitamin D-binding OS=Homo sapiens GN=GC PE=1 SV=1	P	GO:0065008	regulation of biological quality
B0AZV9	TPC6B_HUMANTrafficking particle complex subunit 6B OS=Homo sapiens GN=TRAPPC6B PE=1 SV=1	C	GO:0005829	cytosol
B0AZV9	TPC6B_HUMANTrafficking particle complex subunit 6B OS=Homo sapiens GN=TRAPPC6B PE=1 SV=1	F	GO:0005515	protein binding
B0AZV9	TPC6B_HUMANTrafficking particle complex subunit 6B OS=Homo sapiens GN=TRAPPC6B PE=1 SV=1	P	GO:0048208	COPII vesicle coating
B4DND9	GSCR2_HUMANGlioma tumor suppressor candidate region gene 2 OS=Homo sapiens GN=GLTSCR2 PE=1 SV=2	C	GO:0005730	nucleolus
B4DND9	GSCR2_HUMANGlioma tumor suppressor candidate region gene 2 OS=Homo sapiens GN=GLTSCR2 PE=1 SV=2	N	GO:0044822
Q4G148	GXLT1_HUMANGlucoside xylosyltransferase 1 OS=Homo sapiens GN=GXYLT1 PE=1 SV=2	C	GO:0000139	Golgi membrane
Q4G148	GXLT1_HUMANGlucoside xylosyltransferase 1 OS=Homo sapiens GN=GXYLT1 PE=1 SV=2	F	GO:0030158	protein xylosyltransferase activity
Q4G148	GXLT1_HUMANGlucoside xylosyltransferase 1 OS=Homo sapiens GN=GXYLT1 PE=1 SV=2	P	GO:0016266	O-glycan processing
Q4G148	GXLT1_HUMANGlucoside xylosyltransferase 1 OS=Homo sapiens GN=GXYLT1 PE=1 SV=2	P	GO:0030206	chondroitin sulfate biosynthetic process
E9PM82	ASCC1_HUMANActivating signal cointegrator 1 complex subunit 1 OS=Homo sapiens GN=ASCC1 PE=1 SV=1	C	GO:0044424	intracellular part
E9PM82	ASCC1_HUMANActivating signal cointegrator 1 complex subunit 1 OS=Homo sapiens GN=ASCC1 PE=1 SV=1	F	GO:0003723	RNA binding
Q5T440	CAF17_HUMAN transferase mitochondrial OS=Homo sapiens GN=IBA57 PE=1 SV=1	C	GO:0005739	mitochondrion
Q5T440	CAF17_HUMAN transferase mitochondrial OS=Homo sapiens GN=IBA57 PE=1 SV=1	N	GO:0044822
Q5T440	CAF17_HUMAN transferase mitochondrial OS=Homo sapiens GN=IBA57 PE=1 SV=1	P	GO:0051188	cofactor biosynthetic process
B4E1V0	TRFL_HUMANLactotransferrin OS=Homo sapiens GN=LTF PE=1 SV=6	C	GO:0005615	extracellular space
B4E1V0	TRFL_HUMANLactotransferrin OS=Homo sapiens GN=LTF PE=1 SV=6	C	GO:0005634	nucleus
B4E1V0	TRFL_HUMANLactotransferrin OS=Homo sapiens GN=LTF PE=1 SV=6	C	GO:0005768	endosome
B4E1V0	TRFL_HUMANLactotransferrin OS=Homo sapiens GN=LTF PE=1 SV=6	C	GO:0009986	cell surface
B4E1V0	TRFL_HUMANLactotransferrin OS=Homo sapiens GN=LTF PE=1 SV=6	C	GO:0042581	specific granule
B4E1V0	TRFL_HUMANLactotransferrin OS=Homo sapiens GN=LTF PE=1 SV=6	C	GO:0043234	protein complex
B4E1V0	TRFL_HUMANLactotransferrin OS=Homo sapiens GN=LTF PE=1 SV=6	C	GO:0044459	plasma membrane part
B4E1V0	TRFL_HUMANLactotransferrin OS=Homo sapiens GN=LTF PE=1 SV=6	C	GO:0070062	extracellular vesicular exosome
B4E1V0	TRFL_HUMANLactotransferrin OS=Homo sapiens GN=LTF PE=1 SV=6	C	GO:0097013	phagocytic vesicle lumen
B4E1V0	TRFL_HUMANLactotransferrin OS=Homo sapiens GN=LTF PE=1 SV=6	F	GO:0004252	serine-type endopeptidase activity
B4E1V0	TRFL_HUMANLactotransferrin OS=Homo sapiens GN=LTF PE=1 SV=6	F	GO:0005506	iron ion binding
B4E1V0	TRFL_HUMANLactotransferrin OS=Homo sapiens GN=LTF PE=1 SV=6	F	GO:0005515	protein binding
B4E1V0	TRFL_HUMANLactotransferrin OS=Homo sapiens GN=LTF PE=1 SV=6	F	GO:0008201	heparin binding
B4E1V0	TRFL_HUMANLactotransferrin OS=Homo sapiens GN=LTF PE=1 SV=6	F	GO:0043539	protein serine/threonine kinase activator activity
B4E1V0	TRFL_HUMANLactotransferrin OS=Homo sapiens GN=LTF PE=1 SV=6	P	GO:0001895	retina homeostasis
B4E1V0	TRFL_HUMANLactotransferrin OS=Homo sapiens GN=LTF PE=1 SV=6	P	GO:0002227	innate immune response in mucosa
B4E1V0	TRFL_HUMANLactotransferrin OS=Homo sapiens GN=LTF PE=1 SV=6	P	GO:0006826	iron ion transport
B4E1V0	TRFL_HUMANLactotransferrin OS=Homo sapiens GN=LTF PE=1 SV=6	P	GO:0010721	negative regulation of cell development
B4E1V0	TRFL_HUMANLactotransferrin OS=Homo sapiens GN=LTF PE=1 SV=6	P	GO:0019731	antibacterial humoral response
B4E1V0	TRFL_HUMANLactotransferrin OS=Homo sapiens GN=LTF PE=1 SV=6	P	GO:0019732	antifungal humoral response
B4E1V0	TRFL_HUMANLactotransferrin OS=Homo sapiens GN=LTF PE=1 SV=6	P	GO:0031665	negative regulation of lipopolysaccharide-mediated signaling pathway
B4E1V0	TRFL_HUMANLactotransferrin OS=Homo sapiens GN=LTF PE=1 SV=6	P	GO:0032680	regulation of tumor necrosis factor production
B4E1V0	TRFL_HUMANLactotransferrin OS=Homo sapiens GN=LTF PE=1 SV=6	P	GO:0032780	negative regulation of ATPase activity
B4E1V0	TRFL_HUMANLactotransferrin OS=Homo sapiens GN=LTF PE=1 SV=6	P	GO:0033214	iron assimilation by chelation and transport
B4E1V0	TRFL_HUMANLactotransferrin OS=Homo sapiens GN=LTF PE=1 SV=6	P	GO:0033690	positive regulation of osteoblast proliferation
B4E1V0	TRFL_HUMANLactotransferrin OS=Homo sapiens GN=LTF PE=1 SV=6	P	GO:0034145	positive regulation of toll-like receptor 4 signaling pathway
B4E1V0	TRFL_HUMANLactotransferrin OS=Homo sapiens GN=LTF PE=1 SV=6	P	GO:0043123	positive regulation of I-kappaB kinase/NF-kappaB cascade
B4E1V0	TRFL_HUMANLactotransferrin OS=Homo sapiens GN=LTF PE=1 SV=6	P	GO:0044793	negative regulation by host of viral process
B4E1V0	TRFL_HUMANLactotransferrin OS=Homo sapiens GN=LTF PE=1 SV=6	P	GO:0045071	negative regulation of viral genome replication
B4E1V0	TRFL_HUMANLactotransferrin OS=Homo sapiens GN=LTF PE=1 SV=6	P	GO:0045454	cell redox homeostasis
B4E1V0	TRFL_HUMANLactotransferrin OS=Homo sapiens GN=LTF PE=1 SV=6	P	GO:0045669	positive regulation of osteoblast differentiation
B4E1V0	TRFL_HUMANLactotransferrin OS=Homo sapiens GN=LTF PE=1 SV=6	P	GO:0051092	positive regulation of NF-kappaB transcription factor activity
B4E1V0	TRFL_HUMANLactotransferrin OS=Homo sapiens GN=LTF PE=1 SV=6	P	GO:0051128	regulation of cellular component organization
B4E1V0	TRFL_HUMANLactotransferrin OS=Homo sapiens GN=LTF PE=1 SV=6	P	GO:0051241	negative regulation of multicellular organismal process
B4E1V0	TRFL_HUMANLactotransferrin OS=Homo sapiens GN=LTF PE=1 SV=6	P	GO:0060349	bone morphogenesis
B4E1V0	TRFL_HUMANLactotransferrin OS=Homo sapiens GN=LTF PE=1 SV=6	P	GO:0071902	positive regulation of protein serine/threonine kinase activity
B4E1V0	TRFL_HUMANLactotransferrin OS=Homo sapiens GN=LTF PE=1 SV=6	P	GO:1900229	negative regulation of single-species biofilm formation in or on host organism
B4E1V0	TRFL_HUMANLactotransferrin OS=Homo sapiens GN=LTF PE=1 SV=6	N	GO:1902732
B4E1V0	TRFL_HUMANLactotransferrin OS=Homo sapiens GN=LTF PE=1 SV=6	N	GO:1903010
Q5T985	ITIH2_HUMANInter-alpha-trypsin inhibitor heavy chain H2 OS=Homo sapiens GN=ITIH2 PE=1 SV=2	C	GO:0070062	extracellular vesicular exosome
Q5T985	ITIH2_HUMANInter-alpha-trypsin inhibitor heavy chain H2 OS=Homo sapiens GN=ITIH2 PE=1 SV=2	C	GO:0072562	blood microparticle
Q5T985	ITIH2_HUMANInter-alpha-trypsin inhibitor heavy chain H2 OS=Homo sapiens GN=ITIH2 PE=1 SV=2	F	GO:0004867	serine-type endopeptidase inhibitor activity
Q5T985	ITIH2_HUMANInter-alpha-trypsin inhibitor heavy chain H2 OS=Homo sapiens GN=ITIH2 PE=1 SV=2	P	GO:0030212	hyaluronan metabolic process
Q5T985	ITIH2_HUMANInter-alpha-trypsin inhibitor heavy chain H2 OS=Homo sapiens GN=ITIH2 PE=1 SV=2	P	GO:0050789	regulation of biological process
Q9P1Y5	CAMP3_HUMANCalmodulin-regulated spectrin-associated 3 OS=Homo sapiens GN=CAMSAP3 PE=1 SV=2	C	GO:0005813	centrosome
Q9P1Y5	CAMP3_HUMANCalmodulin-regulated spectrin-associated 3 OS=Homo sapiens GN=CAMSAP3 PE=1 SV=2	C	GO:0005915	zonula adherens
Q9P1Y5	CAMP3_HUMANCalmodulin-regulated spectrin-associated 3 OS=Homo sapiens GN=CAMSAP3 PE=1 SV=2	F	GO:0005516	calmodulin binding
Q9P1Y5	CAMP3_HUMANCalmodulin-regulated spectrin-associated 3 OS=Homo sapiens GN=CAMSAP3 PE=1 SV=2	F	GO:0030507	spectrin binding
Q9P1Y5	CAMP3_HUMANCalmodulin-regulated spectrin-associated 3 OS=Homo sapiens GN=CAMSAP3 PE=1 SV=2	F	GO:0051011	microtubule minus-end binding
Q9P1Y5	CAMP3_HUMANCalmodulin-regulated spectrin-associated 3 OS=Homo sapiens GN=CAMSAP3 PE=1 SV=2	P	GO:0010923	negative regulation of phosphatase activity
Q9P1Y5	CAMP3_HUMANCalmodulin-regulated spectrin-associated 3 OS=Homo sapiens GN=CAMSAP3 PE=1 SV=2	P	GO:0031175	neuron projection development
Q9P1Y5	CAMP3_HUMANCalmodulin-regulated spectrin-associated 3 OS=Homo sapiens GN=CAMSAP3 PE=1 SV=2	P	GO:0034453	microtubule anchoring
Q9P1Y5	CAMP3_HUMANCalmodulin-regulated spectrin-associated 3 OS=Homo sapiens GN=CAMSAP3 PE=1 SV=2	P	GO:0045218	zonula adherens maintenance
Q9P1Y5	CAMP3_HUMANCalmodulin-regulated spectrin-associated 3 OS=Homo sapiens GN=CAMSAP3 PE=1 SV=2	P	GO:0070507	regulation of microtubule cytoskeleton organization
Q9P1Y5	CAMP3_HUMANCalmodulin-regulated spectrin-associated 3 OS=Homo sapiens GN=CAMSAP3 PE=1 SV=2	P	GO:0090136	epithelial cell-cell adhesion
Q9P1Y5	CAMP3_HUMANCalmodulin-regulated spectrin-associated 3 OS=Homo sapiens GN=CAMSAP3 PE=1 SV=2	C	GO:0008091	spectrin
Q8IY37	DHX37_HUMANProbable ATP-dependent RNA helicase DHX37 OS=Homo sapiens GN=DHX37 PE=1 SV=1	C	GO:0005654	nucleoplasm
Q8IY37	DHX37_HUMANProbable ATP-dependent RNA helicase DHX37 OS=Homo sapiens GN=DHX37 PE=1 SV=1	C	GO:0005737	cytoplasm
Q8IY37	DHX37_HUMANProbable ATP-dependent RNA helicase DHX37 OS=Homo sapiens GN=DHX37 PE=1 SV=1	C	GO:0043232	intracellular non-membrane-bounded organelle
Q8IY37	DHX37_HUMANProbable ATP-dependent RNA helicase DHX37 OS=Homo sapiens GN=DHX37 PE=1 SV=1	F	GO:0003723	RNA binding
Q8IY37	DHX37_HUMANProbable ATP-dependent RNA helicase DHX37 OS=Homo sapiens GN=DHX37 PE=1 SV=1	F	GO:0003724	RNA helicase activity
Q8IY37	DHX37_HUMANProbable ATP-dependent RNA helicase DHX37 OS=Homo sapiens GN=DHX37 PE=1 SV=1	F	GO:0005524	ATP binding
Q8IY37	DHX37_HUMANProbable ATP-dependent RNA helicase DHX37 OS=Homo sapiens GN=DHX37 PE=1 SV=1	F	GO:0008026	ATP-dependent helicase activity
Q8IY37	DHX37_HUMANProbable ATP-dependent RNA helicase DHX37 OS=Homo sapiens GN=DHX37 PE=1 SV=1	P	GO:0006364	rRNA processing
Q9ULR3	PPM1H_HUMAN phosphatase 1H OS=Homo sapiens GN=PPM1H PE=1 SV=2	C	GO:0005634	nucleus
Q9ULR3	PPM1H_HUMAN phosphatase 1H OS=Homo sapiens GN=PPM1H PE=1 SV=2	C	GO:0005737	cytoplasm
Q9ULR3	PPM1H_HUMAN phosphatase 1H OS=Homo sapiens GN=PPM1H PE=1 SV=2	F	GO:0004722	protein serine/threonine phosphatase activity
Q9ULR3	PPM1H_HUMAN phosphatase 1H OS=Homo sapiens GN=PPM1H PE=1 SV=2	F	GO:0005488	binding
Q9ULR3	PPM1H_HUMAN phosphatase 1H OS=Homo sapiens GN=PPM1H PE=1 SV=2	P	GO:0006470	protein dephosphorylation
Q9ULR3	PPM1H_HUMAN phosphatase 1H OS=Homo sapiens GN=PPM1H PE=1 SV=2	P	GO:0048518	positive regulation of biological process
Q9ULR3	PPM1H_HUMAN phosphatase 1H OS=Homo sapiens GN=PPM1H PE=1 SV=2	P	GO:0048523	negative regulation of cellular process
Q9ULR3	PPM1H_HUMAN phosphatase 1H OS=Homo sapiens GN=PPM1H PE=1 SV=2	C	GO:0008287	protein serine/threonine phosphatase complex
H7C5E8	TRFE_HUMANSerotransferrin OS=Homo sapiens GN=TF PE=1 SV=3	C	GO:0005769	early endosome
H7C5E8	TRFE_HUMANSerotransferrin OS=Homo sapiens GN=TF PE=1 SV=3	C	GO:0005770	late endosome
H7C5E8	TRFE_HUMANSerotransferrin OS=Homo sapiens GN=TF PE=1 SV=3	C	GO:0005905	coated pit
H7C5E8	TRFE_HUMANSerotransferrin OS=Homo sapiens GN=TF PE=1 SV=3	C	GO:0009925	basal plasma membrane
H7C5E8	TRFE_HUMANSerotransferrin OS=Homo sapiens GN=TF PE=1 SV=3	C	GO:0010008	endosome membrane
H7C5E8	TRFE_HUMANSerotransferrin OS=Homo sapiens GN=TF PE=1 SV=3	C	GO:0016324	apical plasma membrane
H7C5E8	TRFE_HUMANSerotransferrin OS=Homo sapiens GN=TF PE=1 SV=3	C	GO:0030139	endocytic vesicle
H7C5E8	TRFE_HUMANSerotransferrin OS=Homo sapiens GN=TF PE=1 SV=3	C	GO:0031232	extrinsic to external side of plasma membrane
H7C5E8	TRFE_HUMANSerotransferrin OS=Homo sapiens GN=TF PE=1 SV=3	C	GO:0034774	secretory granule lumen
H7C5E8	TRFE_HUMANSerotransferrin OS=Homo sapiens GN=TF PE=1 SV=3	C	GO:0048471	perinuclear region of cytoplasm
H7C5E8	TRFE_HUMANSerotransferrin OS=Homo sapiens GN=TF PE=1 SV=3	C	GO:0055037	recycling endosome
H7C5E8	TRFE_HUMANSerotransferrin OS=Homo sapiens GN=TF PE=1 SV=3	C	GO:0070062	extracellular vesicular exosome
H7C5E8	TRFE_HUMANSerotransferrin OS=Homo sapiens GN=TF PE=1 SV=3	C	GO:0072562	blood microparticle
H7C5E8	TRFE_HUMANSerotransferrin OS=Homo sapiens GN=TF PE=1 SV=3	N	GO:1990712
H7C5E8	TRFE_HUMANSerotransferrin OS=Homo sapiens GN=TF PE=1 SV=3	F	GO:0008198	ferrous iron binding
H7C5E8	TRFE_HUMANSerotransferrin OS=Homo sapiens GN=TF PE=1 SV=3	F	GO:0016787	hydrolase activity
H7C5E8	TRFE_HUMANSerotransferrin OS=Homo sapiens GN=TF PE=1 SV=3	N	GO:1990459
H7C5E8	TRFE_HUMANSerotransferrin OS=Homo sapiens GN=TF PE=1 SV=3	P	GO:0001817	regulation of cytokine production
H7C5E8	TRFE_HUMANSerotransferrin OS=Homo sapiens GN=TF PE=1 SV=3	P	GO:0001895	retina homeostasis
H7C5E8	TRFE_HUMANSerotransferrin OS=Homo sapiens GN=TF PE=1 SV=3	P	GO:0002576	platelet degranulation
H7C5E8	TRFE_HUMANSerotransferrin OS=Homo sapiens GN=TF PE=1 SV=3	P	GO:0006879	cellular iron ion homeostasis
H7C5E8	TRFE_HUMANSerotransferrin OS=Homo sapiens GN=TF PE=1 SV=3	P	GO:0006959	humoral immune response
H7C5E8	TRFE_HUMANSerotransferrin OS=Homo sapiens GN=TF PE=1 SV=3	P	GO:0009966	regulation of signal transduction
H7C5E8	TRFE_HUMANSerotransferrin OS=Homo sapiens GN=TF PE=1 SV=3	P	GO:0010468	regulation of gene expression
H7C5E8	TRFE_HUMANSerotransferrin OS=Homo sapiens GN=TF PE=1 SV=3	P	GO:0031323	regulation of cellular metabolic process
H7C5E8	TRFE_HUMANSerotransferrin OS=Homo sapiens GN=TF PE=1 SV=3	P	GO:0031647	regulation of protein stability
H7C5E8	TRFE_HUMANSerotransferrin OS=Homo sapiens GN=TF PE=1 SV=3	P	GO:0033572	transferrin transport
H7C5E8	TRFE_HUMANSerotransferrin OS=Homo sapiens GN=TF PE=1 SV=3	P	GO:0042127	regulation of cell proliferation
H7C5E8	TRFE_HUMANSerotransferrin OS=Homo sapiens GN=TF PE=1 SV=3	P	GO:0045595	regulation of cell differentiation
H7C5E8	TRFE_HUMANSerotransferrin OS=Homo sapiens GN=TF PE=1 SV=3	P	GO:0048260	positive regulation of receptor-mediated endocytosis
H7C5E8	TRFE_HUMANSerotransferrin OS=Homo sapiens GN=TF PE=1 SV=3	P	GO:0048525	negative regulation of viral process
H7C5E8	TRFE_HUMANSerotransferrin OS=Homo sapiens GN=TF PE=1 SV=3	P	GO:0065009	regulation of molecular function
H7C5E8	TRFE_HUMANSerotransferrin OS=Homo sapiens GN=TF PE=1 SV=3	P	GO:0071281	cellular response to iron ion
H7C5E8	TRFE_HUMANSerotransferrin OS=Homo sapiens GN=TF PE=1 SV=3	P	GO:0080090	regulation of primary metabolic process
H7C5E8	TRFE_HUMANSerotransferrin OS=Homo sapiens GN=TF PE=1 SV=3	P	GO:0097460	ferrous iron import into cell
H7C5E8	TRFE_HUMANSerotransferrin OS=Homo sapiens GN=TF PE=1 SV=3	N	GO:0098542
B3KRB7	IKKB_HUMANInhibitor of nuclear factor kappa-B kinase subunit beta OS=Homo sapiens GN=IKBKB PE=1 SV=1	C	GO:0008385	IkappaB kinase complex
B3KRB7	IKKB_HUMANInhibitor of nuclear factor kappa-B kinase subunit beta OS=Homo sapiens GN=IKBKB PE=1 SV=1	C	GO:0044459	plasma membrane part
B3KRB7	IKKB_HUMANInhibitor of nuclear factor kappa-B kinase subunit beta OS=Homo sapiens GN=IKBKB PE=1 SV=1	F	GO:0008384	IkappaB kinase activity
B3KRB7	IKKB_HUMANInhibitor of nuclear factor kappa-B kinase subunit beta OS=Homo sapiens GN=IKBKB PE=1 SV=1	F	GO:0019901	protein kinase binding
B3KRB7	IKKB_HUMANInhibitor of nuclear factor kappa-B kinase subunit beta OS=Homo sapiens GN=IKBKB PE=1 SV=1	F	GO:0042803	protein homodimerization activity
B3KRB7	IKKB_HUMANInhibitor of nuclear factor kappa-B kinase subunit beta OS=Homo sapiens GN=IKBKB PE=1 SV=1	F	GO:0046982	protein heterodimerization activity
B3KRB7	IKKB_HUMANInhibitor of nuclear factor kappa-B kinase subunit beta OS=Homo sapiens GN=IKBKB PE=1 SV=1	F	GO:0097110	scaffold protein binding
B3KRB7	IKKB_HUMANInhibitor of nuclear factor kappa-B kinase subunit beta OS=Homo sapiens GN=IKBKB PE=1 SV=1	P	GO:0002223	stimulatory C-type lectin receptor signaling pathway
B3KRB7	IKKB_HUMANInhibitor of nuclear factor kappa-B kinase subunit beta OS=Homo sapiens GN=IKBKB PE=1 SV=1	P	GO:0006954	inflammatory response
B3KRB7	IKKB_HUMANInhibitor of nuclear factor kappa-B kinase subunit beta OS=Homo sapiens GN=IKBKB PE=1 SV=1	P	GO:0009615	response to virus
B3KRB7	IKKB_HUMANInhibitor of nuclear factor kappa-B kinase subunit beta OS=Homo sapiens GN=IKBKB PE=1 SV=1	P	GO:0010803	regulation of tumor necrosis factor-mediated signaling pathway
B3KRB7	IKKB_HUMANInhibitor of nuclear factor kappa-B kinase subunit beta OS=Homo sapiens GN=IKBKB PE=1 SV=1	P	GO:0030866	cortical actin cytoskeleton organization
B3KRB7	IKKB_HUMANInhibitor of nuclear factor kappa-B kinase subunit beta OS=Homo sapiens GN=IKBKB PE=1 SV=1	P	GO:0035509	negative regulation of myosin-light-chain-phosphatase activity
B3KRB7	IKKB_HUMANInhibitor of nuclear factor kappa-B kinase subunit beta OS=Homo sapiens GN=IKBKB PE=1 SV=1	P	GO:0035666	TRIF-dependent toll-like receptor signaling pathway
B3KRB7	IKKB_HUMANInhibitor of nuclear factor kappa-B kinase subunit beta OS=Homo sapiens GN=IKBKB PE=1 SV=1	P	GO:0038095	Fc-epsilon receptor signaling pathway
B3KRB7	IKKB_HUMANInhibitor of nuclear factor kappa-B kinase subunit beta OS=Homo sapiens GN=IKBKB PE=1 SV=1	P	GO:0042325	regulation of phosphorylation
B3KRB7	IKKB_HUMANInhibitor of nuclear factor kappa-B kinase subunit beta OS=Homo sapiens GN=IKBKB PE=1 SV=1	P	GO:0042501	serine phosphorylation of STAT protein
B3KRB7	IKKB_HUMANInhibitor of nuclear factor kappa-B kinase subunit beta OS=Homo sapiens GN=IKBKB PE=1 SV=1	P	GO:0043066	negative regulation of apoptotic process
B3KRB7	IKKB_HUMANInhibitor of nuclear factor kappa-B kinase subunit beta OS=Homo sapiens GN=IKBKB PE=1 SV=1	P	GO:0043123	positive regulation of I-kappaB kinase/NF-kappaB cascade
B3KRB7	IKKB_HUMANInhibitor of nuclear factor kappa-B kinase subunit beta OS=Homo sapiens GN=IKBKB PE=1 SV=1	P	GO:0045944	positive regulation of transcription from RNA polymerase II promoter
B3KRB7	IKKB_HUMANInhibitor of nuclear factor kappa-B kinase subunit beta OS=Homo sapiens GN=IKBKB PE=1 SV=1	P	GO:0050852	T cell receptor signaling pathway
B3KRB7	IKKB_HUMANInhibitor of nuclear factor kappa-B kinase subunit beta OS=Homo sapiens GN=IKBKB PE=1 SV=1	P	GO:0051092	positive regulation of NF-kappaB transcription factor activity
B3KRB7	IKKB_HUMANInhibitor of nuclear factor kappa-B kinase subunit beta OS=Homo sapiens GN=IKBKB PE=1 SV=1	P	GO:0051403	stress-activated MAPK cascade
B3KRB7	IKKB_HUMANInhibitor of nuclear factor kappa-B kinase subunit beta OS=Homo sapiens GN=IKBKB PE=1 SV=1	P	GO:0070423	nucleotide-binding oligomerization domain containing signaling pathway
B3KRB7	IKKB_HUMANInhibitor of nuclear factor kappa-B kinase subunit beta OS=Homo sapiens GN=IKBKB PE=1 SV=1	P	GO:0070498	interleukin-1-mediated signaling pathway
B3KRB7	IKKB_HUMANInhibitor of nuclear factor kappa-B kinase subunit beta OS=Homo sapiens GN=IKBKB PE=1 SV=1	P	GO:0090002	establishment of protein localization to plasma membrane
B3KRB7	IKKB_HUMANInhibitor of nuclear factor kappa-B kinase subunit beta OS=Homo sapiens GN=IKBKB PE=1 SV=1	P	GO:1901700	response to oxygen-containing compound
B3KRB7	IKKB_HUMANInhibitor of nuclear factor kappa-B kinase subunit beta OS=Homo sapiens GN=IKBKB PE=1 SV=1	N	GO:1903140
B3KRB7	IKKB_HUMANInhibitor of nuclear factor kappa-B kinase subunit beta OS=Homo sapiens GN=IKBKB PE=1 SV=1	N	GO:1903347
B3KRB7	IKKB_HUMANInhibitor of nuclear factor kappa-B kinase subunit beta OS=Homo sapiens GN=IKBKB PE=1 SV=1	P	GO:0009069	serine family amino acid metabolic process
B4DMI9	DLGP5_HUMANDisks large-associated 5 OS=Homo sapiens GN=DLGAP5 PE=1 SV=2	C	GO:0005634	nucleus
B4DMI9	DLGP5_HUMANDisks large-associated 5 OS=Homo sapiens GN=DLGAP5 PE=1 SV=2	C	GO:0005737	cytoplasm
B4DMI9	DLGP5_HUMANDisks large-associated 5 OS=Homo sapiens GN=DLGAP5 PE=1 SV=2	C	GO:0031616	spindle pole centrosome
B4DMI9	DLGP5_HUMANDisks large-associated 5 OS=Homo sapiens GN=DLGAP5 PE=1 SV=2	F	GO:0004721	phosphoprotein phosphatase activity
B4DMI9	DLGP5_HUMANDisks large-associated 5 OS=Homo sapiens GN=DLGAP5 PE=1 SV=2	F	GO:0005515	protein binding
B4DMI9	DLGP5_HUMANDisks large-associated 5 OS=Homo sapiens GN=DLGAP5 PE=1 SV=2	P	GO:0023052	signaling
B4DMI9	DLGP5_HUMANDisks large-associated 5 OS=Homo sapiens GN=DLGAP5 PE=1 SV=2	P	GO:0044763	single-organism cellular process
B4DMI9	DLGP5_HUMANDisks large-associated 5 OS=Homo sapiens GN=DLGAP5 PE=1 SV=2	P	GO:0006470	protein dephosphorylation
Q96RG4	IRS2_HUMANInsulin receptor substrate 2 OS=Homo sapiens GN=IRS2 PE=1 SV=2	C	GO:0005829	cytosol
Q96RG4	IRS2_HUMANInsulin receptor substrate 2 OS=Homo sapiens GN=IRS2 PE=1 SV=2	F	GO:0004871	signal transducer activity
Q96RG4	IRS2_HUMANInsulin receptor substrate 2 OS=Homo sapiens GN=IRS2 PE=1 SV=2	F	GO:0005088	Ras guanyl-nucleotide exchange factor activity
Q96RG4	IRS2_HUMANInsulin receptor substrate 2 OS=Homo sapiens GN=IRS2 PE=1 SV=2	F	GO:0005158	insulin receptor binding
Q96RG4	IRS2_HUMANInsulin receptor substrate 2 OS=Homo sapiens GN=IRS2 PE=1 SV=2	F	GO:0016303	1-phosphatidylinositol-3-kinase activity
Q96RG4	IRS2_HUMANInsulin receptor substrate 2 OS=Homo sapiens GN=IRS2 PE=1 SV=2	F	GO:0046934	phosphatidylinositol-4,5-bisphosphate 3-kinase activity
Q96RG4	IRS2_HUMANInsulin receptor substrate 2 OS=Homo sapiens GN=IRS2 PE=1 SV=2	P	GO:0000165	MAPK cascade
Q96RG4	IRS2_HUMANInsulin receptor substrate 2 OS=Homo sapiens GN=IRS2 PE=1 SV=2	P	GO:0008284	positive regulation of cell proliferation
Q96RG4	IRS2_HUMANInsulin receptor substrate 2 OS=Homo sapiens GN=IRS2 PE=1 SV=2	P	GO:0010647	positive regulation of cell communication
Q96RG4	IRS2_HUMANInsulin receptor substrate 2 OS=Homo sapiens GN=IRS2 PE=1 SV=2	P	GO:0010748	negative regulation of plasma membrane long-chain fatty acid transport
Q96RG4	IRS2_HUMANInsulin receptor substrate 2 OS=Homo sapiens GN=IRS2 PE=1 SV=2	P	GO:0014066	regulation of phosphatidylinositol 3-kinase cascade
Q96RG4	IRS2_HUMANInsulin receptor substrate 2 OS=Homo sapiens GN=IRS2 PE=1 SV=2	P	GO:0023056	positive regulation of signaling
Q96RG4	IRS2_HUMANInsulin receptor substrate 2 OS=Homo sapiens GN=IRS2 PE=1 SV=2	P	GO:0032000	positive regulation of fatty acid beta-oxidation
Q96RG4	IRS2_HUMANInsulin receptor substrate 2 OS=Homo sapiens GN=IRS2 PE=1 SV=2	P	GO:0032869	cellular response to insulin stimulus
Q96RG4	IRS2_HUMANInsulin receptor substrate 2 OS=Homo sapiens GN=IRS2 PE=1 SV=2	P	GO:0045725	positive regulation of glycogen biosynthetic process
Q96RG4	IRS2_HUMANInsulin receptor substrate 2 OS=Homo sapiens GN=IRS2 PE=1 SV=2	P	GO:0046326	positive regulation of glucose import
Q96RG4	IRS2_HUMANInsulin receptor substrate 2 OS=Homo sapiens GN=IRS2 PE=1 SV=2	P	GO:0048523	negative regulation of cellular process
Q96RG4	IRS2_HUMANInsulin receptor substrate 2 OS=Homo sapiens GN=IRS2 PE=1 SV=2	P	GO:0055088	lipid homeostasis
Q96RG4	IRS2_HUMANInsulin receptor substrate 2 OS=Homo sapiens GN=IRS2 PE=1 SV=2	P	GO:0043087	regulation of GTPase activity
Q96RG4	IRS2_HUMANInsulin receptor substrate 2 OS=Homo sapiens GN=IRS2 PE=1 SV=2	C	GO:0005899	insulin receptor complex
Q8TB52	FBX30_HUMANF-box only 30 OS=Homo sapiens GN=FBXO30 PE=1 SV=3	F	GO:0005515	protein binding
Q8TB52	FBX30_HUMANF-box only 30 OS=Homo sapiens GN=FBXO30 PE=1 SV=3	F	GO:0008270	zinc ion binding
Q8TB52	FBX30_HUMANF-box only 30 OS=Homo sapiens GN=FBXO30 PE=1 SV=3	N	GO:0061630
Q8TB52	FBX30_HUMANF-box only 30 OS=Homo sapiens GN=FBXO30 PE=1 SV=3	P	GO:0016567	protein ubiquitination
B4DQK1	ATG7_HUMANUbiquitin-like modifier-activating enzyme ATG7 OS=Homo sapiens GN=ATG7 PE=1 SV=1	C	GO:0005829	cytosol
B4DQK1	ATG7_HUMANUbiquitin-like modifier-activating enzyme ATG7 OS=Homo sapiens GN=ATG7 PE=1 SV=1	F	GO:0004839	ubiquitin activating enzyme activity
B4DQK1	ATG7_HUMANUbiquitin-like modifier-activating enzyme ATG7 OS=Homo sapiens GN=ATG7 PE=1 SV=1	F	GO:0008134	transcription factor binding
B4DQK1	ATG7_HUMANUbiquitin-like modifier-activating enzyme ATG7 OS=Homo sapiens GN=ATG7 PE=1 SV=1	F	GO:0042803	protein homodimerization activity
B4DQK1	ATG7_HUMANUbiquitin-like modifier-activating enzyme ATG7 OS=Homo sapiens GN=ATG7 PE=1 SV=1	P	GO:0006497	protein lipidation
B4DQK1	ATG7_HUMANUbiquitin-like modifier-activating enzyme ATG7 OS=Homo sapiens GN=ATG7 PE=1 SV=1	P	GO:0009267	cellular response to starvation
B4DQK1	ATG7_HUMANUbiquitin-like modifier-activating enzyme ATG7 OS=Homo sapiens GN=ATG7 PE=1 SV=1	P	GO:0016239	positive regulation of macroautophagy
B4DQK1	ATG7_HUMANUbiquitin-like modifier-activating enzyme ATG7 OS=Homo sapiens GN=ATG7 PE=1 SV=1	P	GO:0031401	positive regulation of protein modification process
B4DQK1	ATG7_HUMANUbiquitin-like modifier-activating enzyme ATG7 OS=Homo sapiens GN=ATG7 PE=1 SV=1	P	GO:0039521	suppression by virus of host autophagy
B4DQK1	ATG7_HUMANUbiquitin-like modifier-activating enzyme ATG7 OS=Homo sapiens GN=ATG7 PE=1 SV=1	P	GO:0043065	positive regulation of apoptotic process
B4DQK1	ATG7_HUMANUbiquitin-like modifier-activating enzyme ATG7 OS=Homo sapiens GN=ATG7 PE=1 SV=1	P	GO:0045732	positive regulation of protein catabolic process
B4DQK1	ATG7_HUMANUbiquitin-like modifier-activating enzyme ATG7 OS=Homo sapiens GN=ATG7 PE=1 SV=1	P	GO:0051607	defense response to virus
B4DQK1	ATG7_HUMANUbiquitin-like modifier-activating enzyme ATG7 OS=Homo sapiens GN=ATG7 PE=1 SV=1	P	GO:0061025	membrane fusion
B4DQK1	ATG7_HUMANUbiquitin-like modifier-activating enzyme ATG7 OS=Homo sapiens GN=ATG7 PE=1 SV=1	P	GO:0071455	cellular response to hyperoxia
B4DQK1	ATG7_HUMANUbiquitin-like modifier-activating enzyme ATG7 OS=Homo sapiens GN=ATG7 PE=1 SV=1	N	GO:1903146
B4DQK1	ATG7_HUMANUbiquitin-like modifier-activating enzyme ATG7 OS=Homo sapiens GN=ATG7 PE=1 SV=1	P	GO:0031396	regulation of protein ubiquitination
B4DQK1	ATG7_HUMANUbiquitin-like modifier-activating enzyme ATG7 OS=Homo sapiens GN=ATG7 PE=1 SV=1	C	GO:0005667	transcription factor complex
A0A140VJE0	ADK_HUMANAdenosine kinase OS=Homo sapiens GN=ADK PE=1 SV=2	C	GO:0005654	nucleoplasm
A0A140VJE0	ADK_HUMANAdenosine kinase OS=Homo sapiens GN=ADK PE=1 SV=2	C	GO:0005829	cytosol
A0A140VJE0	ADK_HUMANAdenosine kinase OS=Homo sapiens GN=ADK PE=1 SV=2	F	GO:0004001	adenosine kinase activity
A0A140VJE0	ADK_HUMANAdenosine kinase OS=Homo sapiens GN=ADK PE=1 SV=2	N	GO:0044822
A0A140VJE0	ADK_HUMANAdenosine kinase OS=Homo sapiens GN=ADK PE=1 SV=2	P	GO:0006166	purine ribonucleoside salvage
A0A140VJE0	ADK_HUMANAdenosine kinase OS=Homo sapiens GN=ADK PE=1 SV=2	P	GO:0009156	ribonucleoside monophosphate biosynthetic process
A0A140VJE0	ADK_HUMANAdenosine kinase OS=Homo sapiens GN=ADK PE=1 SV=2	P	GO:0006144	purine nucleobase metabolic process
B7Z8Q4	HEMO_HUMANHemopexin OS=Homo sapiens GN=HPX PE=1 SV=2	C	GO:0070062	extracellular vesicular exosome
B7Z8Q4	HEMO_HUMANHemopexin OS=Homo sapiens GN=HPX PE=1 SV=2	C	GO:0071682	endocytic vesicle lumen
B7Z8Q4	HEMO_HUMANHemopexin OS=Homo sapiens GN=HPX PE=1 SV=2	C	GO:0072562	blood microparticle
B7Z8Q4	HEMO_HUMANHemopexin OS=Homo sapiens GN=HPX PE=1 SV=2	F	GO:0005515	protein binding
B7Z8Q4	HEMO_HUMANHemopexin OS=Homo sapiens GN=HPX PE=1 SV=2	F	GO:0015232	heme transporter activity
B7Z8Q4	HEMO_HUMANHemopexin OS=Homo sapiens GN=HPX PE=1 SV=2	P	GO:0006879	cellular iron ion homeostasis
B7Z8Q4	HEMO_HUMANHemopexin OS=Homo sapiens GN=HPX PE=1 SV=2	P	GO:0006898	receptor-mediated endocytosis
B7Z8Q4	HEMO_HUMANHemopexin OS=Homo sapiens GN=HPX PE=1 SV=2	P	GO:0015886	heme transport
B7Z8Q4	HEMO_HUMANHemopexin OS=Homo sapiens GN=HPX PE=1 SV=2	P	GO:0048518	positive regulation of biological process
Q12872	SFSWA_HUMANSplicing suppressor of white-apricot homolog OS=Homo sapiens GN=SFSWAP PE=1 SV=3	C	GO:0005634	nucleus
Q12872	SFSWA_HUMANSplicing suppressor of white-apricot homolog OS=Homo sapiens GN=SFSWAP PE=1 SV=3	F	GO:0003723	RNA binding
Q12872	SFSWA_HUMANSplicing suppressor of white-apricot homolog OS=Homo sapiens GN=SFSWAP PE=1 SV=3	F	GO:0005515	protein binding
Q12872	SFSWA_HUMANSplicing suppressor of white-apricot homolog OS=Homo sapiens GN=SFSWAP PE=1 SV=3	P	GO:0006376	mRNA splice site selection
Q12872	SFSWA_HUMANSplicing suppressor of white-apricot homolog OS=Homo sapiens GN=SFSWAP PE=1 SV=3	P	GO:0048024	regulation of mRNA splicing, via spliceosome
B3KMT5	ECD_HUMAN ecdysoneless homolog OS=Homo sapiens GN=ECD PE=1 SV=1	C	GO:0005654	nucleoplasm
B3KMT5	ECD_HUMAN ecdysoneless homolog OS=Homo sapiens GN=ECD PE=1 SV=1	C	GO:0005737	cytoplasm
B3KMT5	ECD_HUMAN ecdysoneless homolog OS=Homo sapiens GN=ECD PE=1 SV=1	C	GO:0097255	R2TP complex
B3KMT5	ECD_HUMAN ecdysoneless homolog OS=Homo sapiens GN=ECD PE=1 SV=1	F	GO:0003713	transcription coactivator activity
B3KMT5	ECD_HUMAN ecdysoneless homolog OS=Homo sapiens GN=ECD PE=1 SV=1	F	GO:0035035	histone acetyltransferase binding
B3KMT5	ECD_HUMAN ecdysoneless homolog OS=Homo sapiens GN=ECD PE=1 SV=1	P	GO:0006110	regulation of glycolysis
B3KMT5	ECD_HUMAN ecdysoneless homolog OS=Homo sapiens GN=ECD PE=1 SV=1	P	GO:0045944	positive regulation of transcription from RNA polymerase II promoter
B3KMT5	ECD_HUMAN ecdysoneless homolog OS=Homo sapiens GN=ECD PE=1 SV=1	C	GO:0005667	transcription factor complex
B3KMT5	ECD_HUMAN ecdysoneless homolog OS=Homo sapiens GN=ECD PE=1 SV=1	P	GO:0045941	positive regulation of transcription, DNA-dependent
O00767	ACOD_HUMANAcyl- desaturase OS=Homo sapiens GN=SCD PE=1 SV=2	C	GO:0005789	endoplasmic reticulum membrane
O00767	ACOD_HUMANAcyl- desaturase OS=Homo sapiens GN=SCD PE=1 SV=2	C	GO:0016021	integral to membrane
O00767	ACOD_HUMANAcyl- desaturase OS=Homo sapiens GN=SCD PE=1 SV=2	F	GO:0004768	stearoyl-CoA 9-desaturase activity
O00767	ACOD_HUMANAcyl- desaturase OS=Homo sapiens GN=SCD PE=1 SV=2	F	GO:0005506	iron ion binding
O00767	ACOD_HUMANAcyl- desaturase OS=Homo sapiens GN=SCD PE=1 SV=2	P	GO:0006636	unsaturated fatty acid biosynthetic process
O00767	ACOD_HUMANAcyl- desaturase OS=Homo sapiens GN=SCD PE=1 SV=2	P	GO:0035338	long-chain fatty-acyl-CoA biosynthetic process
O00767	ACOD_HUMANAcyl- desaturase OS=Homo sapiens GN=SCD PE=1 SV=2	P	GO:0055114	oxidation-reduction process
O60287	NPA1P_HUMANNucleolar pre-ribosomal-associated 1 OS=Homo sapiens GN=URB1 PE=1 SV=4	C	GO:0005730	nucleolus
O60287	NPA1P_HUMANNucleolar pre-ribosomal-associated 1 OS=Homo sapiens GN=URB1 PE=1 SV=4	N	GO:0044822
Q53RD8	ZC3H8_HUMANZinc finger CCCH domain-containing 8 OS=Homo sapiens GN=ZC3H8 PE=1 SV=2	C	GO:0008023	transcription elongation factor complex
Q53RD8	ZC3H8_HUMANZinc finger CCCH domain-containing 8 OS=Homo sapiens GN=ZC3H8 PE=1 SV=2	C	GO:0015030	Cajal body
Q53RD8	ZC3H8_HUMANZinc finger CCCH domain-containing 8 OS=Homo sapiens GN=ZC3H8 PE=1 SV=2	C	GO:0035327	transcriptionally active chromatin
Q53RD8	ZC3H8_HUMANZinc finger CCCH domain-containing 8 OS=Homo sapiens GN=ZC3H8 PE=1 SV=2	C	GO:0035363	histone locus body
Q53RD8	ZC3H8_HUMANZinc finger CCCH domain-containing 8 OS=Homo sapiens GN=ZC3H8 PE=1 SV=2	F	GO:0003700	sequence-specific DNA binding transcription factor activity
Q53RD8	ZC3H8_HUMANZinc finger CCCH domain-containing 8 OS=Homo sapiens GN=ZC3H8 PE=1 SV=2	F	GO:0005515	protein binding
Q53RD8	ZC3H8_HUMANZinc finger CCCH domain-containing 8 OS=Homo sapiens GN=ZC3H8 PE=1 SV=2	F	GO:0043565	sequence-specific DNA binding
Q53RD8	ZC3H8_HUMANZinc finger CCCH domain-containing 8 OS=Homo sapiens GN=ZC3H8 PE=1 SV=2	N	GO:0044822
Q53RD8	ZC3H8_HUMANZinc finger CCCH domain-containing 8 OS=Homo sapiens GN=ZC3H8 PE=1 SV=2	F	GO:0046872	metal ion binding
Q53RD8	ZC3H8_HUMANZinc finger CCCH domain-containing 8 OS=Homo sapiens GN=ZC3H8 PE=1 SV=2	P	GO:0033085	negative regulation of T cell differentiation in thymus
Q53RD8	ZC3H8_HUMANZinc finger CCCH domain-containing 8 OS=Homo sapiens GN=ZC3H8 PE=1 SV=2	P	GO:0042795	snRNA transcription from RNA polymerase II promoter
Q53RD8	ZC3H8_HUMANZinc finger CCCH domain-containing 8 OS=Homo sapiens GN=ZC3H8 PE=1 SV=2	P	GO:0042796	snRNA transcription from RNA polymerase III promoter
Q53RD8	ZC3H8_HUMANZinc finger CCCH domain-containing 8 OS=Homo sapiens GN=ZC3H8 PE=1 SV=2	P	GO:0043029	T cell homeostasis
Q53RD8	ZC3H8_HUMANZinc finger CCCH domain-containing 8 OS=Homo sapiens GN=ZC3H8 PE=1 SV=2	P	GO:0045892	negative regulation of transcription, DNA-dependent
Q53RD8	ZC3H8_HUMANZinc finger CCCH domain-containing 8 OS=Homo sapiens GN=ZC3H8 PE=1 SV=2	P	GO:0045945	positive regulation of transcription from RNA polymerase III promoter
Q53RD8	ZC3H8_HUMANZinc finger CCCH domain-containing 8 OS=Homo sapiens GN=ZC3H8 PE=1 SV=2	P	GO:0046677	response to antibiotic
Q53RD8	ZC3H8_HUMANZinc finger CCCH domain-containing 8 OS=Homo sapiens GN=ZC3H8 PE=1 SV=2	P	GO:0070245	positive regulation of thymocyte apoptotic process
Q53RD8	ZC3H8_HUMANZinc finger CCCH domain-containing 8 OS=Homo sapiens GN=ZC3H8 PE=1 SV=2	C	GO:0005667	transcription factor complex
Q53RD8	ZC3H8_HUMANZinc finger CCCH domain-containing 8 OS=Homo sapiens GN=ZC3H8 PE=1 SV=2	P	GO:0045449	regulation of transcription, DNA-dependent
P01023	A2MG_HUMANAlpha-2-macroglobulin OS=Homo sapiens GN=A2M PE=1 SV=3	C	GO:0005829	cytosol
P01023	A2MG_HUMANAlpha-2-macroglobulin OS=Homo sapiens GN=A2M PE=1 SV=3	C	GO:0031093	platelet alpha granule lumen
P01023	A2MG_HUMANAlpha-2-macroglobulin OS=Homo sapiens GN=A2M PE=1 SV=3	C	GO:0070062	extracellular vesicular exosome
P01023	A2MG_HUMANAlpha-2-macroglobulin OS=Homo sapiens GN=A2M PE=1 SV=3	C	GO:0072562	blood microparticle
P01023	A2MG_HUMANAlpha-2-macroglobulin OS=Homo sapiens GN=A2M PE=1 SV=3	F	GO:0002020	protease binding
P01023	A2MG_HUMANAlpha-2-macroglobulin OS=Homo sapiens GN=A2M PE=1 SV=3	F	GO:0004867	serine-type endopeptidase inhibitor activity
P01023	A2MG_HUMANAlpha-2-macroglobulin OS=Homo sapiens GN=A2M PE=1 SV=3	F	GO:0005096	GTPase activator activity
P01023	A2MG_HUMANAlpha-2-macroglobulin OS=Homo sapiens GN=A2M PE=1 SV=3	F	GO:0005102	receptor binding
P01023	A2MG_HUMANAlpha-2-macroglobulin OS=Homo sapiens GN=A2M PE=1 SV=3	F	GO:0019959	interleukin-8 binding
P01023	A2MG_HUMANAlpha-2-macroglobulin OS=Homo sapiens GN=A2M PE=1 SV=3	F	GO:0019966	interleukin-1 binding
P01023	A2MG_HUMANAlpha-2-macroglobulin OS=Homo sapiens GN=A2M PE=1 SV=3	F	GO:0043120	tumor necrosis factor binding
P01023	A2MG_HUMANAlpha-2-macroglobulin OS=Homo sapiens GN=A2M PE=1 SV=3	F	GO:0048306	calcium-dependent protein binding
P01023	A2MG_HUMANAlpha-2-macroglobulin OS=Homo sapiens GN=A2M PE=1 SV=3	P	GO:0001869	negative regulation of complement activation, lectin pathway
P01023	A2MG_HUMANAlpha-2-macroglobulin OS=Homo sapiens GN=A2M PE=1 SV=3	P	GO:0002576	platelet degranulation
P01023	A2MG_HUMANAlpha-2-macroglobulin OS=Homo sapiens GN=A2M PE=1 SV=3	P	GO:0007597	blood coagulation, intrinsic pathway
P01023	A2MG_HUMANAlpha-2-macroglobulin OS=Homo sapiens GN=A2M PE=1 SV=3	P	GO:0022617	extracellular matrix disassembly
P01023	A2MG_HUMANAlpha-2-macroglobulin OS=Homo sapiens GN=A2M PE=1 SV=3	P	GO:0044767	single-organism developmental process
P01023	A2MG_HUMANAlpha-2-macroglobulin OS=Homo sapiens GN=A2M PE=1 SV=3	P	GO:0051056	regulation of small GTPase mediated signal transduction
P01023	A2MG_HUMANAlpha-2-macroglobulin OS=Homo sapiens GN=A2M PE=1 SV=3	P	GO:0051336	regulation of hydrolase activity
H3BQH3	KLDC4_HUMANKelch domain-containing 4 OS=Homo sapiens GN=KLHDC4 PE=1 SV=1	C	GO:0044428	nuclear part
H3BQH3	KLDC4_HUMANKelch domain-containing 4 OS=Homo sapiens GN=KLHDC4 PE=1 SV=1	F	GO:0005515	protein binding
H3BQH3	KLDC4_HUMANKelch domain-containing 4 OS=Homo sapiens GN=KLHDC4 PE=1 SV=1	P	GO:0009987	cellular process
G5E9A6	UBP11_HUMANUbiquitin carboxyl-terminal hydrolase 11 OS=Homo sapiens GN=USP11 PE=1 SV=3	C	GO:0005634	nucleus
G5E9A6	UBP11_HUMANUbiquitin carboxyl-terminal hydrolase 11 OS=Homo sapiens GN=USP11 PE=1 SV=3	C	GO:0005768	endosome
G5E9A6	UBP11_HUMANUbiquitin carboxyl-terminal hydrolase 11 OS=Homo sapiens GN=USP11 PE=1 SV=3	C	GO:0016020	membrane
G5E9A6	UBP11_HUMANUbiquitin carboxyl-terminal hydrolase 11 OS=Homo sapiens GN=USP11 PE=1 SV=3	F	GO:0004197	cysteine-type endopeptidase activity
G5E9A6	UBP11_HUMANUbiquitin carboxyl-terminal hydrolase 11 OS=Homo sapiens GN=USP11 PE=1 SV=3	F	GO:0004843	ubiquitin-specific protease activity
G5E9A6	UBP11_HUMANUbiquitin carboxyl-terminal hydrolase 11 OS=Homo sapiens GN=USP11 PE=1 SV=3	F	GO:0005515	protein binding
G5E9A6	UBP11_HUMANUbiquitin carboxyl-terminal hydrolase 11 OS=Homo sapiens GN=USP11 PE=1 SV=3	P	GO:0006511	ubiquitin-dependent protein catabolic process
G5E9A6	UBP11_HUMANUbiquitin carboxyl-terminal hydrolase 11 OS=Homo sapiens GN=USP11 PE=1 SV=3	P	GO:0016579	protein deubiquitination
G5E9A6	UBP11_HUMANUbiquitin carboxyl-terminal hydrolase 11 OS=Homo sapiens GN=USP11 PE=1 SV=3	P	GO:0044763	single-organism cellular process
G5E9A6	UBP11_HUMANUbiquitin carboxyl-terminal hydrolase 11 OS=Homo sapiens GN=USP11 PE=1 SV=3	P	GO:0050794	regulation of cellular process
G5E9A6	UBP11_HUMANUbiquitin carboxyl-terminal hydrolase 11 OS=Homo sapiens GN=USP11 PE=1 SV=3	P	GO:0051716	cellular response to stimulus
G5E9A6	UBP11_HUMANUbiquitin carboxyl-terminal hydrolase 11 OS=Homo sapiens GN=USP11 PE=1 SV=3	P	GO:0060255	regulation of macromolecule metabolic process
Q7Z6E9	RBBP6_HUMANE3 ubiquitin- ligase RBBP6 OS=Homo sapiens GN=RBBP6 PE=1 SV=1	C	GO:0005654	nucleoplasm
Q7Z6E9	RBBP6_HUMANE3 ubiquitin- ligase RBBP6 OS=Homo sapiens GN=RBBP6 PE=1 SV=1	C	GO:0005829	cytosol
Q7Z6E9	RBBP6_HUMANE3 ubiquitin- ligase RBBP6 OS=Homo sapiens GN=RBBP6 PE=1 SV=1	C	GO:0043232	intracellular non-membrane-bounded organelle
Q7Z6E9	RBBP6_HUMANE3 ubiquitin- ligase RBBP6 OS=Homo sapiens GN=RBBP6 PE=1 SV=1	F	GO:0005515	protein binding
Q7Z6E9	RBBP6_HUMANE3 ubiquitin- ligase RBBP6 OS=Homo sapiens GN=RBBP6 PE=1 SV=1	F	GO:0008270	zinc ion binding
Q7Z6E9	RBBP6_HUMANE3 ubiquitin- ligase RBBP6 OS=Homo sapiens GN=RBBP6 PE=1 SV=1	N	GO:0044822
Q7Z6E9	RBBP6_HUMANE3 ubiquitin- ligase RBBP6 OS=Homo sapiens GN=RBBP6 PE=1 SV=1	N	GO:0061630
Q7Z6E9	RBBP6_HUMANE3 ubiquitin- ligase RBBP6 OS=Homo sapiens GN=RBBP6 PE=1 SV=1	P	GO:0000209	protein polyubiquitination
Q7Z6E9	RBBP6_HUMANE3 ubiquitin- ligase RBBP6 OS=Homo sapiens GN=RBBP6 PE=1 SV=1	P	GO:0006275	regulation of DNA replication
Q7Z6E9	RBBP6_HUMANE3 ubiquitin- ligase RBBP6 OS=Homo sapiens GN=RBBP6 PE=1 SV=1	P	GO:0006397	mRNA processing
Q7Z6E9	RBBP6_HUMANE3 ubiquitin- ligase RBBP6 OS=Homo sapiens GN=RBBP6 PE=1 SV=1	P	GO:0006974	response to DNA damage stimulus
Q7Z6E9	RBBP6_HUMANE3 ubiquitin- ligase RBBP6 OS=Homo sapiens GN=RBBP6 PE=1 SV=1	P	GO:0042787	protein ubiquitination involved in ubiquitin-dependent protein catabolic process
Q7Z6E9	RBBP6_HUMANE3 ubiquitin- ligase RBBP6 OS=Homo sapiens GN=RBBP6 PE=1 SV=1	P	GO:0044707	single-multicellular organism process
Q7Z6E9	RBBP6_HUMANE3 ubiquitin- ligase RBBP6 OS=Homo sapiens GN=RBBP6 PE=1 SV=1	P	GO:0044767	single-organism developmental process
B7Z8R6	AMBP_HUMAN AMBP OS=Homo sapiens GN=AMBP PE=1 SV=1	C	GO:0005886	plasma membrane
B7Z8R6	AMBP_HUMAN AMBP OS=Homo sapiens GN=AMBP PE=1 SV=1	C	GO:0012505	endomembrane system
B7Z8R6	AMBP_HUMAN AMBP OS=Homo sapiens GN=AMBP PE=1 SV=1	C	GO:0043005	neuron projection
B7Z8R6	AMBP_HUMAN AMBP OS=Homo sapiens GN=AMBP PE=1 SV=1	C	GO:0043231	intracellular membrane-bounded organelle
B7Z8R6	AMBP_HUMAN AMBP OS=Homo sapiens GN=AMBP PE=1 SV=1	C	GO:0044444	cytoplasmic part
B7Z8R6	AMBP_HUMAN AMBP OS=Homo sapiens GN=AMBP PE=1 SV=1	C	GO:0044446	intracellular organelle part
B7Z8R6	AMBP_HUMAN AMBP OS=Homo sapiens GN=AMBP PE=1 SV=1	C	GO:0044463	cell projection part
B7Z8R6	AMBP_HUMAN AMBP OS=Homo sapiens GN=AMBP PE=1 SV=1	C	GO:0070062	extracellular vesicular exosome
B7Z8R6	AMBP_HUMAN AMBP OS=Homo sapiens GN=AMBP PE=1 SV=1	C	GO:0072562	blood microparticle
B7Z8R6	AMBP_HUMAN AMBP OS=Homo sapiens GN=AMBP PE=1 SV=1	F	GO:0004867	serine-type endopeptidase inhibitor activity
B7Z8R6	AMBP_HUMAN AMBP OS=Homo sapiens GN=AMBP PE=1 SV=1	F	GO:0019862	IgA binding
B7Z8R6	AMBP_HUMAN AMBP OS=Homo sapiens GN=AMBP PE=1 SV=1	F	GO:0020037	heme binding
B7Z8R6	AMBP_HUMAN AMBP OS=Homo sapiens GN=AMBP PE=1 SV=1	F	GO:0042803	protein homodimerization activity
B7Z8R6	AMBP_HUMAN AMBP OS=Homo sapiens GN=AMBP PE=1 SV=1	P	GO:0006898	receptor-mediated endocytosis
B7Z8R6	AMBP_HUMAN AMBP OS=Homo sapiens GN=AMBP PE=1 SV=1	P	GO:0006952	defense response
B7Z8R6	AMBP_HUMAN AMBP OS=Homo sapiens GN=AMBP PE=1 SV=1	P	GO:0016043	cellular component organization
B7Z8R6	AMBP_HUMAN AMBP OS=Homo sapiens GN=AMBP PE=1 SV=1	P	GO:0022414	reproductive process
B7Z8R6	AMBP_HUMAN AMBP OS=Homo sapiens GN=AMBP PE=1 SV=1	P	GO:0046329	negative regulation of JNK cascade
B7Z8R6	AMBP_HUMAN AMBP OS=Homo sapiens GN=AMBP PE=1 SV=1	P	GO:0048699	generation of neurons
B7Z8R6	AMBP_HUMAN AMBP OS=Homo sapiens GN=AMBP PE=1 SV=1	P	GO:0051707	response to other organism
B7Z8R6	AMBP_HUMAN AMBP OS=Homo sapiens GN=AMBP PE=1 SV=1	P	GO:0065009	regulation of molecular function
B7Z8R6	AMBP_HUMAN AMBP OS=Homo sapiens GN=AMBP PE=1 SV=1	P	GO:1901360	organic cyclic compound metabolic process
B7Z8R6	AMBP_HUMAN AMBP OS=Homo sapiens GN=AMBP PE=1 SV=1	C	GO:0019814	immunoglobulin complex
B3KXW2	ZN532_HUMANZinc finger 532 OS=Homo sapiens GN=ZNF532 PE=1 SV=2	F	GO:0003677	DNA binding
B3KXW2	ZN532_HUMANZinc finger 532 OS=Homo sapiens GN=ZNF532 PE=1 SV=2	F	GO:0046872	metal ion binding
A0A087WVA8	TEX2_HUMANTestis-expressed sequence 2 OS=Homo sapiens GN=TEX2 PE=1 SV=2	C	GO:0016021	integral to membrane
A0A087WVA8	TEX2_HUMANTestis-expressed sequence 2 OS=Homo sapiens GN=TEX2 PE=1 SV=2	P	GO:0006665	sphingolipid metabolic process
A0A087WVA8	TEX2_HUMANTestis-expressed sequence 2 OS=Homo sapiens GN=TEX2 PE=1 SV=2	P	GO:0007165	signal transduction
B4DMX4	FETA_HUMANAlpha-feto OS=Homo sapiens GN=AFP PE=1 SV=1	C	GO:0005615	extracellular space
B4DMX4	FETA_HUMANAlpha-feto OS=Homo sapiens GN=AFP PE=1 SV=1	C	GO:0043227	membrane-bounded organelle
B4DMX4	FETA_HUMANAlpha-feto OS=Homo sapiens GN=AFP PE=1 SV=1	C	GO:0044444	cytoplasmic part
B4DMX4	FETA_HUMANAlpha-feto OS=Homo sapiens GN=AFP PE=1 SV=1	F	GO:0005515	protein binding
B4DMX4	FETA_HUMANAlpha-feto OS=Homo sapiens GN=AFP PE=1 SV=1	F	GO:0043167	ion binding
B4DMX4	FETA_HUMANAlpha-feto OS=Homo sapiens GN=AFP PE=1 SV=1	P	GO:0006810	transport
B4DMX4	FETA_HUMANAlpha-feto OS=Homo sapiens GN=AFP PE=1 SV=1	P	GO:0042221	response to chemical stimulus
B4DMX4	FETA_HUMANAlpha-feto OS=Homo sapiens GN=AFP PE=1 SV=1	P	GO:0044763	single-organism cellular process
B4DMX4	FETA_HUMANAlpha-feto OS=Homo sapiens GN=AFP PE=1 SV=1	P	GO:0048513	organ development
B4DMX4	FETA_HUMANAlpha-feto OS=Homo sapiens GN=AFP PE=1 SV=1	P	GO:0050789	regulation of biological process
B4DMX4	FETA_HUMANAlpha-feto OS=Homo sapiens GN=AFP PE=1 SV=1	P	GO:0051704	multi-organism process
B4DMX4	FETA_HUMANAlpha-feto OS=Homo sapiens GN=AFP PE=1 SV=1	P	GO:0065008	regulation of biological quality
Q96HP0	DOCK6_HUMANDedicator of cytokinesis 6 OS=Homo sapiens GN=DOCK6 PE=1 SV=3	C	GO:0005829	cytosol
Q96HP0	DOCK6_HUMANDedicator of cytokinesis 6 OS=Homo sapiens GN=DOCK6 PE=1 SV=3	C	GO:0042995	cell projection
Q96HP0	DOCK6_HUMANDedicator of cytokinesis 6 OS=Homo sapiens GN=DOCK6 PE=1 SV=3	C	GO:0043226	organelle
Q96HP0	DOCK6_HUMANDedicator of cytokinesis 6 OS=Homo sapiens GN=DOCK6 PE=1 SV=3	C	GO:0097458	neuron part
Q96HP0	DOCK6_HUMANDedicator of cytokinesis 6 OS=Homo sapiens GN=DOCK6 PE=1 SV=3	F	GO:0005085	guanyl-nucleotide exchange factor activity
Q96HP0	DOCK6_HUMANDedicator of cytokinesis 6 OS=Homo sapiens GN=DOCK6 PE=1 SV=3	F	GO:0019899	enzyme binding
Q96HP0	DOCK6_HUMANDedicator of cytokinesis 6 OS=Homo sapiens GN=DOCK6 PE=1 SV=3	P	GO:0007010	cytoskeleton organization
Q96HP0	DOCK6_HUMANDedicator of cytokinesis 6 OS=Homo sapiens GN=DOCK6 PE=1 SV=3	P	GO:0007264	small GTPase mediated signal transduction
Q96HP0	DOCK6_HUMANDedicator of cytokinesis 6 OS=Homo sapiens GN=DOCK6 PE=1 SV=3	P	GO:0007596	blood coagulation
Q96HP0	DOCK6_HUMANDedicator of cytokinesis 6 OS=Homo sapiens GN=DOCK6 PE=1 SV=3	P	GO:0008283	cell proliferation
Q96HP0	DOCK6_HUMANDedicator of cytokinesis 6 OS=Homo sapiens GN=DOCK6 PE=1 SV=3	P	GO:0032879	regulation of localization
Q96HP0	DOCK6_HUMANDedicator of cytokinesis 6 OS=Homo sapiens GN=DOCK6 PE=1 SV=3	P	GO:0042110	T cell activation
Q96HP0	DOCK6_HUMANDedicator of cytokinesis 6 OS=Homo sapiens GN=DOCK6 PE=1 SV=3	P	GO:0048522	positive regulation of cellular process
Q96HP0	DOCK6_HUMANDedicator of cytokinesis 6 OS=Homo sapiens GN=DOCK6 PE=1 SV=3	P	GO:0048699	generation of neurons
Q96HP0	DOCK6_HUMANDedicator of cytokinesis 6 OS=Homo sapiens GN=DOCK6 PE=1 SV=3	P	GO:0043087	regulation of GTPase activity

## Sheet: BP
GO function annotation and analysis different expressed proteins of ACBP-OXA vs. control BP
Level	GO_ID	Term	Type	Seqs_Num	Sequences
1	GO:0008150	biological_process	Biological Process	114	A0A087WVA8, C9K025, Q9BW34, Q6DKI1, Q9BWT3, P62081, G3V1D1, Q53RD8, Q5HYD9, Q8TDD1, A0A0A0MRW6, A0A087WXM6, B4DMI9, Q9ULW0, B3KRB7, I3L1D4, P07477, Q9P1Y5, Q5T123, Q9Y6H1, F6KPG5, H3BQH3, P63173, P63218, P46013, B3KRC6, H3BMQ2, Q15397, Q13895, Q8NEF9, G5E9A6, Q9BVP2, O75487, P11388, Q96HP0, O60701, B4DQK1, B1ALI9, F1JVV5, Q99988, Q6FHK1, O00458, A8MW49, M0R0F0, B3KM35, Q13823, B3KMT5, Q8TB52, Q4G…
2	GO:0002376	immune system process	Biological Process	13	A8MW49, B4E1V0, Q53RD8, F6KPG5, Q96HP0, P62861, A8YQF4, A0A1B0GVI7, H7C5E8, B4DQK1, B3KRB7, B2RA70, P01023
2	GO:0022610	biological adhesion	Biological Process	9	Q13895, Q8N4P8, B4E1V0, Q16678, Q9P1Y5, P07477, Q53RD8, B2RA70, Q96HP0
2	GO:0008152	metabolic process	Biological Process	95	Q9Y3U8, O95478, A0A087WVA8, Q9ULR3, C9K025, Q71UM5, Q9BW34, Q6DKI1, Q9BWT3, P62081, G3V1D1, Q53RD8, Q5HYD9, Q8TDD1, B4DTK6, B2R823, A0A1B0GVI7, A0A0A0MRW6, A0A087WXM6, P39023, B4DMI9, A0A140VJE0, Q9ULW0, I3L1D4, B3KRB7, P07477, S4R456, Q12872, Q16678, Q9P1Y5, A0A024RDF4, B7Z8R6, B4DE67, Q5T440, Q9Y6H1, F6KPG5, Q9NY93, P63173, B3KRC6, Q15397, P01023, O00767, P09669, Q13895, Q8NEF9, Q96RG4, G5E9A6,…
2	GO:0022414	reproductive process	Biological Process	4	Q13895, B4DUP5, A0A1B0GVI7, B7Z8R6
2	GO:0050896	response to stimulus	Biological Process	47	Q13895, A0A087WVA8, G5E9A6, B4E1V0, Q96RG4, Q71UM5, Q9BW34, B4DMX4, Q53RD8, P11388, Q96HP0, Q8TDD1, A0A1B0GVI7, B2R4U3, H7C5E8, B4DQK1, Q9ULW0, B1ALI9, B3KRB7, Q15125, I3L1D4, P48506, F1JVV5, Q92876, Q99988, B7Z2S5, Q7Z6E9, O15173, A8MW49, P60604, Q16678, Q8IZZ8, A0A024RDF4, B7Z8R6, D6RBJ7, B3KQT6, Q5T123, B4DE48, Q9Y6H1, F6KPG5, Q5JXX1, P62861, A8YQF4, B4DUP5, P63218, B2RA70, P01023
2	GO:0051179	localization	Biological Process	44	Q9Y3U8, P09669, C9K025, Q96RG4, B4E1V0, Q9BVP2, Q71UM5, B7Z8Q4, P62081, G3V1D1, B4DMX4, Q96HP0, Q6N075, P50914, A0A087WXM6, P39023, H7C5E8, A8K7A2, Q86U90, P07477, B3KRB7, Q15125, I3L1D4, Q99988, S4R456, A8MW49, P60604, M0R0F0, Q8N4P8, B7Z8R6, D6RBJ7, A0A024RDF4, B3KQT6, Q5T123, B0AZV9, B4DE48, F6KPG5, P16402, A8K4B4, P62861, P63173, D3YTB1, B2RA70, P01023
2	GO:0040007	growth	Biological Process	3	P07477, P16402, Q99988
2	GO:0050789	regulation of biological process	Biological Process	68	A0A087WVA8, Q9ULR3, Q71UM5, Q9BW34, B7Z8Q4, G3V1D1, Q53RD8, Q8TDD1, B4DTK6, A0A1B0GVI7, Q9ULW0, B3KRB7, I3L1D4, P07477, O15173, Q12872, Q16678, Q9P1Y5, A0A024RDF4, B7Z8R6, Q5T123, Q9Y6H1, F6KPG5, Q9NY93, P63218, Q15397, P01023, B4E1V0, Q96RG4, G5E9A6, Q9BVP2, O75487, P31350, B4DMX4, P11388, Q96HP0, B2R4U3, H7C5E8, B4DQK1, I3L2L5, Q86U90, B1ALI9, Q15125, P48506, Q99988, Q92876, F1JVV5, Q7Z6E9, F6T…
2	GO:0001906	cell killing	Biological Process	1	F6KPG5
2	GO:0044699	single-organism process	Biological Process	87	Q9Y3U8, A0A087WVA8, C9K025, Q71UM5, Q9BW34, B7Z8Q4, P62081, G3V1D1, Q53RD8, Q5HYD9, Q8TDD1, A0A1B0GVI7, A0A087WXM6, P39023, B4DMI9, A0A140VJE0, Q9ULW0, B3KRB7, P07477, I3L1D4, O15173, S4R456, Q16678, Q9P1Y5, A0A024RDF4, B7Z8R6, B4DE67, Q5T123, B0AZV9, F6KPG5, Q9NY93, P63173, P63218, P46013, B3KRC6, P01023, Q15397, O00767, P09669, Q13895, B4E1V0, Q96RG4, G5E9A6, O75487, P31350, B4DMX4, P11388, Q96…
2	GO:0044848	biological phase	Biological Process	3	Q71UM5, B2R4U3, A8K7A2
2	GO:0009987	cellular process	Biological Process	109	A0A087WVA8, C9K025, Q9BW34, Q6DKI1, Q9BWT3, P62081, G3V1D1, Q53RD8, Q5HYD9, Q8TDD1, A0A0A0MRW6, A0A087WXM6, B4DMI9, Q9ULW0, B3KRB7, P07477, I3L1D4, Q9P1Y5, Q5T123, Q9Y6H1, F6KPG5, H3BQH3, P63173, P63218, P46013, B3KRC6, H3BMQ2, Q15397, Q13895, Q8NEF9, G5E9A6, Q9BVP2, O75487, P11388, Q96HP0, O60701, B4DQK1, B1ALI9, F1JVV5, Q99988, Q6FHK1, O00458, A8MW49, M0R0F0, B3KM35, B3KMT5, Q13823, Q8TB52, Q4G…
2	GO:0023052	signaling	Biological Process	25	A0A087WVA8, Q96RG4, B4E1V0, Q71UM5, Q9BW34, Q96HP0, Q8TDD1, A0A1B0GVI7, B2R4U3, H7C5E8, B4DMI9, Q9ULW0, B3KRB7, Q15125, Q99988, Q92876, F1JVV5, O15173, B7Z8R6, Q5T123, B4DE48, A8YQF4, P63218, B2RA70, P01023
2	GO:0040011	locomotion	Biological Process	5	Q8N4P8, Q5T123, O75487, P07477, B2RA70
2	GO:0048511	rhythmic process	Biological Process	3	B4DUP5, A0A1B0GVI7, A0A024RDF4
2	GO:0032502	developmental process	Biological Process	31	Q13895, B4E1V0, O75487, B4DMX4, Q53RD8, P11388, Q96HP0, A0A1B0GVI7, H7C5E8, I3L2L5, B1ALI9, P07477, B3KRB7, I3L1D4, Q15125, Q92876, F1JVV5, Q99988, B7Z2S5, Q7Z6E9, O00458, S4R456, Q8N4P8, Q16678, Q9P1Y5, B7Z8R6, A0A024RDF4, D6RBJ7, B4DUP5, B2RA70, P01023
2	GO:0032501	multicellular organismal process	Biological Process	37	Q13895, B4E1V0, O75487, B4DMX4, Q53RD8, P11388, Q96HP0, A0A1B0GVI7, H7C5E8, I3L2L5, B1ALI9, P07477, B3KRB7, I3L1D4, Q15125, P48506, Q99988, Q92876, F1JVV5, Q7Z6E9, B7Z2S5, S4R456, A8MW49, Q8N4P8, Q16678, Q9P1Y5, Q8IZZ8, B7Z8R6, A0A024RDF4, D6RBJ7, B4DE67, Q5T123, F6KPG5, B4DUP5, P63173, B2RA70, P01023
2	GO:0000003	reproduction	Biological Process	4	Q13895, A0A1B0GVI7, B4DUP5, B7Z8R6
2	GO:0051704	multi-organism process	Biological Process	25	Q9Y3U8, Q13895, B4E1V0, C9K025, Q71UM5, P62081, B4DMX4, P11388, P50914, A0A087WXM6, P39023, H7C5E8, B4DQK1, B3KRB7, S4R456, A8MW49, M0R0F0, B7Z8R6, F6KPG5, K7ER90, Q6IAM0, P62861, P63173, D3YTB1, B2RA70
2	GO:0048518	positive regulation of biological process	Biological Process	32	Q9ULR3, B4E1V0, Q96RG4, Q71UM5, Q9BVP2, Q9BW34, B7Z8Q4, G3V1D1, Q53RD8, P11388, Q96HP0, A0A1B0GVI7, B2R4U3, H7C5E8, B4DQK1, Q9ULW0, P07477, I3L1D4, B3KRB7, Q99988, F1JVV5, Q92876, P60604, Q16678, B3KMT5, A0A024RDF4, B3KQT6, Q9Y6H1, P16402, A8K4B4, B2RA70, P01023
2	GO:0048519	negative regulation of biological process	Biological Process	30	Q9ULR3, B4E1V0, Q96RG4, Q71UM5, G3V1D1, Q53RD8, Q8TDD1, A0A1B0GVI7, B2R4U3, H7C5E8, B4DQK1, Q86U90, B1ALI9, B3KRB7, I3L1D4, P48506, Q99988, F1JVV5, A8MW49, P60604, Q8N4P8, Q16678, Q9P1Y5, Q8IZZ8, A0A024RDF4, B7Z8R6, F6KPG5, P16402, B2RA70, P01023
2	GO:0071840	cellular component organization or biogenesis	Biological Process	50	Q9Y3U8, O95478, C9K025, Q6DKI1, Q71UM5, P62081, B2R823, A0A0A0MRW6, A0A087WXM6, P39023, Q9ULW0, B3KRB7, P07477, S4R456, Q12872, Q9P1Y5, B7Z8R6, Q5T123, B0AZV9, Q9NY93, P63173, H3BMQ2, P01023, Q13895, B4E1V0, Q9BVP2, P11388, Q9H9Y2, Q96HP0, P50914, B2R4U3, A8K7A2, H7C5E8, B4DQK1, Q99988, F1JVV5, Q6FHK1, A8MW49, P60604, M0R0F0, Q8TDN6, Q8IY37, B3KS36, Q5JXX1, P16402, A8K4B4, P62861, Q9BVJ6, D3YTB1,…
2	GO:0065007	biological regulation	Biological Process	69	A0A087WVA8, Q9ULR3, Q9BW34, Q71UM5, B7Z8Q4, G3V1D1, Q53RD8, Q8TDD1, B4DTK6, A0A1B0GVI7, Q9ULW0, B3KRB7, I3L1D4, P07477, O15173, Q12872, Q16678, Q9P1Y5, A0A024RDF4, B7Z8R6, Q5T123, Q9Y6H1, F6KPG5, Q9NY93, P63218, Q15397, P01023, B4E1V0, Q96RG4, G5E9A6, Q9BVP2, O75487, P31350, B4DMX4, P11388, Q96HP0, B2R4U3, H7C5E8, B4DQK1, I3L2L5, Q86U90, B1ALI9, Q15125, P48506, Q99988, Q92876, F1JVV5, Q7Z6E9, F6T…
3	GO:0002683	negative regulation of immune system process	Biological Process	3	Q53RD8, B2RA70, P01023
3	GO:0050900	leukocyte migration	Biological Process	1	B2RA70
3	GO:0051674	localization of cell	Biological Process	4	Q8N4P8, Q5T123, P07477, B2RA70
3	GO:0050794	regulation of cellular process	Biological Process	63	A0A087WVA8, Q9ULR3, Q71UM5, Q9BW34, G3V1D1, Q53RD8, Q8TDD1, B4DTK6, A0A1B0GVI7, Q9ULW0, B3KRB7, I3L1D4, P07477, O15173, Q12872, Q16678, Q9P1Y5, A0A024RDF4, B7Z8R6, Q5T123, Q9Y6H1, F6KPG5, Q9NY93, P63218, Q15397, P01023, B4E1V0, Q96RG4, G5E9A6, Q9BVP2, O75487, P31350, P11388, Q96HP0, B2R4U3, H7C5E8, B4DQK1, I3L2L5, B1ALI9, Q15125, P48506, Q99988, Q92876, F1JVV5, Q7Z6E9, F6TR53, B7Z2S5, A8MW49, P60…
3	GO:1904951	positive regulation of establishment of protein localization	Biological Process	1	B2RA70
3	GO:0043902	positive regulation of multi-organism process	Biological Process	1	P11388
3	GO:0044710	single-organism metabolic process	Biological Process	30	O00767, A0A087WVA8, P09669, Q96RG4, O75487, P31350, Q5HYD9, O60701, A0A140VJE0, B3KRB7, P07477, Q15125, P48506, Q99988, Q92876, B7Z2S5, A8MW49, P60604, B3KM35, Q16678, B3KMT5, Q4G148, D6RBJ7, B7Z8R6, B4DE67, B4DE48, B3KRC6, A0A024R172, B2RA70, Q15397
3	GO:0051234	establishment of localization	Biological Process	37	Q9Y3U8, P09669, Q96RG4, C9K025, B4E1V0, Q71UM5, B7Z8Q4, P62081, G3V1D1, B4DMX4, Q6N075, P50914, A0A087WXM6, P39023, H7C5E8, A8K7A2, Q86U90, B3KRB7, Q15125, S4R456, A8MW49, P60604, M0R0F0, B7Z8R6, D6RBJ7, A0A024RDF4, B3KQT6, B0AZV9, B4DE48, F6KPG5, P16402, A8K4B4, P62861, P63173, D3YTB1, B2RA70, P01023
3	GO:0032846	positive regulation of homeostatic process	Biological Process	1	Q9BVP2
3	GO:0040012	regulation of locomotion	Biological Process	3	Q8N4P8, Q5T123, B2RA70
3	GO:0019835	cytolysis	Biological Process	1	F6KPG5
3	GO:0050793	regulation of developmental process	Biological Process	9	B4E1V0, H7C5E8, I3L2L5, B3KRB7, Q53RD8, B2RA70, Q92876, F1JVV5, Q99988
3	GO:0007155	cell adhesion	Biological Process	8	Q13895, Q8N4P8, Q9P1Y5, Q16678, P07477, Q53RD8, B2RA70, Q96HP0
3	GO:0044707	single-multicellular organism process	Biological Process	34	Q13895, B4E1V0, O75487, B4DMX4, Q53RD8, P11388, Q96HP0, A0A1B0GVI7, H7C5E8, I3L2L5, B1ALI9, P07477, B3KRB7, I3L1D4, Q15125, Q99988, Q92876, F1JVV5, Q7Z6E9, S4R456, A8MW49, Q8N4P8, Q16678, Q9P1Y5, Q8IZZ8, B7Z8R6, A0A024RDF4, D6RBJ7, Q5T123, B4DE67, F6KPG5, B4DUP5, B2RA70, P01023
3	GO:0002520	immune system development	Biological Process	2	Q53RD8, B2RA70
3	GO:0032844	regulation of homeostatic process	Biological Process	3	Q9BVP2, B2R4U3, B2RA70
3	GO:0043900	regulation of multi-organism process	Biological Process	4	A8MW49, B4E1V0, H7C5E8, P11388
3	GO:0044238	primary metabolic process	Biological Process	89	Q9Y3U8, O95478, A0A087WVA8, Q9ULR3, C9K025, Q71UM5, Q9BW34, Q6DKI1, Q9BWT3, P62081, Q53RD8, Q5HYD9, Q8TDD1, B4DTK6, B2R823, A0A1B0GVI7, A0A0A0MRW6, A0A087WXM6, P39023, B4DMI9, A0A140VJE0, Q9ULW0, I3L1D4, B3KRB7, P07477, S4R456, Q12872, Q16678, A0A024RDF4, B7Z8R6, B4DE67, Q9Y6H1, Q9NY93, P63173, B3KRC6, Q15397, P01023, O00767, P09669, Q13895, Q8NEF9, Q96RG4, G5E9A6, B4E1V0, Q9BVP2, O75487, P31350,…
3	GO:0042445	hormone metabolic process	Biological Process	2	Q16678, Q15125
3	GO:0044706	multi-multicellular organism process	Biological Process	1	Q13895
3	GO:0009892	negative regulation of metabolic process	Biological Process	18	A8MW49, P60604, Q8N4P8, Q9P1Y5, A0A024RDF4, B7Z8R6, Q53RD8, P16402, Q8TDD1, A0A1B0GVI7, B2R4U3, B3KRB7, I3L1D4, P48506, F1JVV5, B2RA70, Q99988, P01023
3	GO:1902578	single-organism localization	Biological Process	24	Q9Y3U8, P09669, Q96RG4, C9K025, Q71UM5, B7Z8Q4, P62081, G3V1D1, P50914, A0A087WXM6, P39023, H7C5E8, B3KRB7, Q15125, S4R456, M0R0F0, D6RBJ7, F6KPG5, A8K4B4, P62861, P63173, D3YTB1, B2RA70, P01023
3	GO:0071704	organic substance metabolic process	Biological Process	91	Q9Y3U8, O95478, A0A087WVA8, Q9ULR3, C9K025, Q71UM5, Q9BW34, Q6DKI1, Q9BWT3, P62081, Q53RD8, Q5HYD9, Q8TDD1, B4DTK6, B2R823, A0A1B0GVI7, A0A0A0MRW6, A0A087WXM6, P39023, B4DMI9, A0A140VJE0, Q9ULW0, I3L1D4, B3KRB7, P07477, S4R456, Q12872, Q16678, A0A024RDF4, B7Z8R6, B4DE67, Q9Y6H1, F6KPG5, Q9NY93, P63173, B3KRC6, Q15397, P01023, O00767, P09669, Q13895, Q8NEF9, Q96RG4, G5E9A6, B4E1V0, Q9BVP2, O75487,…
3	GO:0044237	cellular metabolic process	Biological Process	88	Q9Y3U8, O95478, A0A087WVA8, Q9ULR3, C9K025, Q71UM5, Q9BW34, Q6DKI1, Q9BWT3, P62081, Q53RD8, Q5HYD9, Q8TDD1, B4DTK6, B2R823, A0A1B0GVI7, A0A0A0MRW6, A0A087WXM6, P39023, B4DMI9, A0A140VJE0, Q9ULW0, B3KRB7, I3L1D4, P07477, S4R456, Q12872, Q16678, Q9P1Y5, A0A024RDF4, B7Z8R6, B4DE67, Q5T440, Q9Y6H1, Q9NY93, P63173, B3KRC6, Q15397, P01023, O00767, P09669, Q13895, Q8NEF9, Q96RG4, G5E9A6, B4E1V0, Q9BVP2,…
3	GO:0042221	response to chemical	Biological Process	26	Q13895, B4E1V0, Q96RG4, B4DMX4, Q53RD8, Q8TDD1, A0A1B0GVI7, H7C5E8, B4DQK1, B1ALI9, B3KRB7, Q15125, P48506, F1JVV5, Q99988, B7Z2S5, A8MW49, P60604, Q16678, A0A024RDF4, D6RBJ7, Q9Y6H1, F6KPG5, A8YQF4, P63218, B2RA70
3	GO:0044089	positive regulation of cellular component biogenesis	Biological Process	1	B2RA70
3	GO:0048523	negative regulation of cellular process	Biological Process	26	Q9ULR3, B4E1V0, Q96RG4, Q71UM5, G3V1D1, Q53RD8, A0A1B0GVI7, B2R4U3, H7C5E8, B4DQK1, B1ALI9, B3KRB7, P48506, Q99988, F1JVV5, A8MW49, P60604, Q8N4P8, Q9P1Y5, Q16678, A0A024RDF4, B7Z8R6, F6KPG5, P16402, B2RA70, P01023
3	GO:0008283	cell proliferation	Biological Process	12	B4E1V0, Q8N4P8, A0A1B0GVI7, Q96RG4, H7C5E8, O75487, P46013, G3V1D1, Q9ULW0, B2RA70, Q99988, Q96HP0
3	GO:0044085	cellular component biogenesis	Biological Process	32	Q9Y3U8, O95478, Q13895, C9K025, Q6DKI1, Q71UM5, P62081, Q9H9Y2, B2R823, P50914, A0A0A0MRW6, A0A087WXM6, P39023, B2R4U3, Q9ULW0, B3KRB7, Q6FHK1, S4R456, Q12872, M0R0F0, B0AZV9, Q8TDN6, Q8IY37, B3KS36, Q9NY93, P16402, Q9BVJ6, P62861, P63173, D3YTB1, H3BMQ2, B2RA70
3	GO:0009893	positive regulation of metabolic process	Biological Process	20	Q96RG4, B4E1V0, Q9BVP2, Q71UM5, B3KMT5, A0A024RDF4, G3V1D1, Q9Y6H1, Q53RD8, P11388, P16402, A0A1B0GVI7, B2R4U3, B4DQK1, Q9ULW0, I3L1D4, B3KRB7, F1JVV5, B2RA70, Q99988
3	GO:0051091	positive regulation of sequence-specific DNA binding transcription factor activity	Biological Process	2	B4E1V0, B3KRB7
3	GO:1900046	regulation of hemostasis	Biological Process	1	Q8IZZ8
3	GO:0048609	multicellular organismal reproductive process	Biological Process	1	B4DUP5
3	GO:0048522	positive regulation of cellular process	Biological Process	28	B4E1V0, Q96RG4, Q71UM5, Q9BVP2, Q9BW34, G3V1D1, Q53RD8, P11388, Q96HP0, A0A1B0GVI7, B2R4U3, H7C5E8, B4DQK1, Q9ULW0, I3L1D4, P07477, B3KRB7, Q99988, Q92876, F1JVV5, P60604, B3KMT5, Q16678, A0A024RDF4, Q9Y6H1, P16402, A8K4B4, B2RA70
3	GO:0051239	regulation of multicellular organismal process	Biological Process	12	B4E1V0, A0A1B0GVI7, Q16678, Q8IZZ8, H7C5E8, Q5T123, I3L2L5, B3KRB7, Q53RD8, B2RA70, Q99988, F1JVV5
3	GO:0009719	response to endogenous stimulus	Biological Process	8	Q8TDD1, Q96RG4, A0A1B0GVI7, P63218, P48506, B2RA70, Q99988, F1JVV5
3	GO:0044406	adhesion of symbiont to host	Biological Process	1	B4E1V0
3	GO:0032879	regulation of localization	Biological Process	11	P60604, Q96RG4, Q8N4P8, Q9BVP2, H7C5E8, B3KQT6, Q5T123, Q86U90, B2RA70, Q99988, Q96HP0
3	GO:0019882	antigen processing and presentation	Biological Process	1	A8YQF4
3	GO:0040008	regulation of growth	Biological Process	2	P07477, P16402
3	GO:1903828	negative regulation of cellular protein localization	Biological Process	1	P60604
3	GO:0051235	maintenance of location	Biological Process	2	G3V1D1, F6KPG5
3	GO:0051051	negative regulation of transport	Biological Process	3	P60604, Q96RG4, Q86U90
3	GO:0016049	cell growth	Biological Process	2	P07477, P16402
3	GO:0051241	negative regulation of multicellular organismal process	Biological Process	3	B4E1V0, Q53RD8, Q99988
3	GO:0031640	killing of cells of other organism	Biological Process	1	F6KPG5
3	GO:0045321	leukocyte activation	Biological Process	4	A0A1B0GVI7, Q53RD8, B2RA70, Q96HP0
3	GO:0009058	biosynthetic process	Biological Process	54	Q9Y3U8, C9K025, Q71UM5, Q9BW34, Q6DKI1, P62081, Q53RD8, Q8TDD1, B4DTK6, A0A1B0GVI7, A0A087WXM6, P39023, A0A140VJE0, I3L1D4, B3KRB7, S4R456, Q16678, A0A024RDF4, B4DE67, Q5T440, Q9Y6H1, P63173, B3KRC6, Q15397, O00767, Q96RG4, B4E1V0, Q9BVP2, O75487, P31350, O60701, P50914, B4DQK1, Q15125, P48506, Q99988, F1JVV5, Q6FHK1, Q7Z6E9, P60604, B3KM35, Q8N4P8, M0R0F0, B3KMT5, Q4G148, Q5T7U1, B3KS36, P16402,…
3	GO:0009653	anatomical structure morphogenesis	Biological Process	5	B4E1V0, Q16678, O75487, Q99988, B2RA70
3	GO:0032259	methylation	Biological Process	1	P16402
3	GO:0009056	catabolic process	Biological Process	25	Q9Y3U8, G5E9A6, Q96RG4, C9K025, Q71UM5, O75487, P62081, Q53EY9, P50914, B2R4U3, A0A087WXM6, P39023, B4DQK1, P07477, Q7Z6E9, S4R456, A8MW49, P60604, M0R0F0, Q16678, B3KMT5, B4DE48, P62861, P63173, D3YTB1
3	GO:0044087	regulation of cellular component biogenesis	Biological Process	2	B3KRB7, B2RA70
3	GO:0051094	positive regulation of developmental process	Biological Process	4	B4E1V0, B2RA70, Q99988, F1JVV5
3	GO:0002252	immune effector process	Biological Process	4	A8MW49, B4DQK1, B2RA70, P01023
3	GO:0002684	positive regulation of immune system process	Biological Process	4	B4E1V0, B3KRB7, B2RA70, P01023
3	GO:0048583	regulation of response to stimulus	Biological Process	17	A8MW49, P60604, B4E1V0, Q96RG4, Q9BW34, Q8IZZ8, B7Z8R6, Q9Y6H1, A8YQF4, B2R4U3, H7C5E8, Q9ULW0, B3KRB7, B2RA70, Q99988, Q92876, P01023
3	GO:0043901	negative regulation of multi-organism process	Biological Process	2	B4E1V0, H7C5E8
3	GO:0002682	regulation of immune system process	Biological Process	8	A8MW49, B4E1V0, A8YQF4, A0A1B0GVI7, Q53RD8, B3KRB7, B2RA70, P01023
3	GO:0048870	cell motility	Biological Process	4	Q8N4P8, Q5T123, P07477, B2RA70
3	GO:0006807	nitrogen compound metabolic process	Biological Process	65	Q9Y3U8, O95478, A0A087WVA8, C9K025, Q71UM5, Q9BW34, Q6DKI1, Q9BWT3, P62081, Q53RD8, Q8TDD1, B4DTK6, B2R823, A0A1B0GVI7, A0A0A0MRW6, A0A087WXM6, P39023, A0A140VJE0, I3L1D4, B3KRB7, P07477, S4R456, Q12872, Q16678, A0A024RDF4, Q9Y6H1, Q9NY93, P63173, Q15397, P09669, Q13895, Q8NEF9, B4E1V0, Q9BVP2, O75487, P31350, P11388, Q9H9Y2, O60701, P50914, B2R4U3, P48506, Q99988, F1JVV5, B7Z2S5, Q7Z6E9, Q6FHK1,…
3	GO:0044702	single organism reproductive process	Biological Process	1	B4DUP5
3	GO:0009607	response to biotic stimulus	Biological Process	9	A8MW49, P62861, B4E1V0, B7Z8R6, H7C5E8, B4DQK1, B1ALI9, B3KRB7, B2RA70
3	GO:0048585	negative regulation of response to stimulus	Biological Process	5	P60604, B4E1V0, B7Z8R6, B2RA70, P01023
3	GO:0044767	single-organism developmental process	Biological Process	30	Q13895, B4E1V0, O75487, B4DMX4, Q53RD8, P11388, Q96HP0, A0A1B0GVI7, H7C5E8, I3L2L5, B1ALI9, B3KRB7, I3L1D4, Q15125, Q92876, F1JVV5, Q99988, B7Z2S5, Q7Z6E9, O00458, S4R456, Q8N4P8, Q16678, Q9P1Y5, B7Z8R6, A0A024RDF4, D6RBJ7, B4DUP5, B2RA70, P01023
3	GO:0044700	single organism signaling	Biological Process	24	A0A087WVA8, Q96RG4, B4E1V0, Q71UM5, Q9BW34, Q96HP0, Q8TDD1, A0A1B0GVI7, B2R4U3, H7C5E8, Q9ULW0, B3KRB7, Q15125, Q99988, Q92876, F1JVV5, O15173, B7Z8R6, Q5T123, B4DE48, A8YQF4, P63218, B2RA70, P01023
3	GO:1904180	negative regulation of membrane depolarization	Biological Process	1	B2RA70
3	GO:0009628	response to abiotic stimulus	Biological Process	8	A8MW49, B4DUP5, A0A1B0GVI7, Q9BW34, B4DQK1, Q9Y6H1, P48506, B2RA70
3	GO:0045927	positive regulation of growth	Biological Process	2	P07477, P16402
3	GO:0045785	positive regulation of cell adhesion	Biological Process	2	P07477, B2RA70
3	GO:0040017	positive regulation of locomotion	Biological Process	1	B2RA70
3	GO:0044419	interspecies interaction between organisms	Biological Process	21	Q9Y3U8, S4R456, A8MW49, B4E1V0, C9K025, M0R0F0, Q71UM5, P62081, F6KPG5, P11388, K7ER90, Q6IAM0, P62861, P63173, P50914, A0A087WXM6, P39023, H7C5E8, D3YTB1, B4DQK1, B3KRB7
3	GO:0051050	positive regulation of transport	Biological Process	3	Q96RG4, H7C5E8, B2RA70
3	GO:0051641	cellular localization	Biological Process	23	Q9Y3U8, S4R456, P60604, C9K025, M0R0F0, Q9BVP2, Q71UM5, B0AZV9, P62081, G3V1D1, B4DE48, F6KPG5, P16402, A8K4B4, P62861, P63173, P50914, A0A087WXM6, P39023, A8K7A2, D3YTB1, B3KRB7, B2RA70
3	GO:0006955	immune response	Biological Process	8	P62861, B4E1V0, A8YQF4, H7C5E8, B3KRB7, F6KPG5, B2RA70, P01023
3	GO:0022402	cell cycle process	Biological Process	7	A8K4B4, Q71UM5, B2R4U3, A8K7A2, P31350, Q9ULW0, P11388
3	GO:0009605	response to external stimulus	Biological Process	11	A8MW49, P62861, B4E1V0, Q8IZZ8, B7Z8R6, H7C5E8, B4DQK1, B3KRB7, F6KPG5, B2RA70, P01023
3	GO:0032845	negative regulation of homeostatic process	Biological Process	1	B2RA70
3	GO:0098602	single organism cell adhesion	Biological Process	5	Q8N4P8, Q9P1Y5, Q53RD8, B2RA70, Q96HP0
3	GO:0044703	multi-organism reproductive process	Biological Process	1	Q13895
3	GO:0033036	macromolecule localization	Biological Process	22	Q9Y3U8, S4R456, P60604, Q96RG4, C9K025, M0R0F0, Q9BVP2, Q71UM5, A0A024RDF4, P62081, B4DE48, F6KPG5, P16402, P62861, P63173, P50914, A0A087WXM6, P39023, H7C5E8, D3YTB1, B3KRB7, B2RA70
3	GO:0022403	cell cycle phase	Biological Process	3	Q71UM5, B2R4U3, A8K7A2
3	GO:0006950	response to stress	Biological Process	26	B4E1V0, Q71UM5, P11388, Q96HP0, A0A1B0GVI7, B2R4U3, H7C5E8, B4DQK1, B3KRB7, P48506, Q92876, B7Z2S5, Q7Z6E9, A8MW49, P60604, Q16678, Q8IZZ8, B7Z8R6, Q9Y6H1, F6KPG5, Q5JXX1, P62861, A8YQF4, B4DUP5, B2RA70, P01023
3	GO:0019222	regulation of metabolic process	Biological Process	43	Q96RG4, B4E1V0, G5E9A6, Q71UM5, Q9BVP2, Q9BW34, P31350, G3V1D1, Q53RD8, P11388, Q8TDD1, A0A1B0GVI7, B2R4U3, H7C5E8, B4DQK1, Q9ULW0, B1ALI9, I3L1D4, B3KRB7, P48506, Q99988, F1JVV5, Q7Z6E9, A8MW49, P60604, Q12872, M0R0F0, Q8N4P8, Q16678, B3KMT5, Q13823, Q9P1Y5, Q8IZZ8, A0A024RDF4, B7Z8R6, Q9Y6H1, P16402, K7ER90, Q6IAM0, B4DUP5, B2RA70, Q15397, P01023
3	GO:0044763	single-organism cellular process	Biological Process	79	Q9Y3U8, A0A087WVA8, C9K025, Q71UM5, Q9BW34, B7Z8Q4, P62081, G3V1D1, Q53RD8, Q5HYD9, Q8TDD1, A0A1B0GVI7, A0A087WXM6, P39023, B4DMI9, A0A140VJE0, Q9ULW0, B3KRB7, P07477, I3L1D4, O15173, S4R456, Q9P1Y5, Q16678, B7Z8R6, A0A024RDF4, Q5T123, B4DE67, B0AZV9, F6KPG5, P63173, P63218, B3KRC6, P01023, Q15397, O00767, P09669, Q96RG4, B4E1V0, G5E9A6, O75487, P31350, B4DMX4, P11388, Q96HP0, O60701, P50914, B2R…
3	GO:0048584	positive regulation of response to stimulus	Biological Process	7	B4E1V0, Q9BW34, B3KRB7, B2RA70, Q92876, Q99988, P01023
3	GO:0051707	response to other organism	Biological Process	8	A8MW49, P62861, B4E1V0, H7C5E8, B7Z8R6, B4DQK1, B3KRB7, B2RA70
3	GO:0035821	modification of morphology or physiology of other organism	Biological Process	3	B4E1V0, B4DQK1, F6KPG5
3	GO:0051240	positive regulation of multicellular organismal process	Biological Process	5	B4E1V0, Q16678, B2RA70, Q99988, F1JVV5
3	GO:0006914	autophagy	Biological Process	2	A8MW49, B4DQK1
3	GO:0002253	activation of immune response	Biological Process	4	B4E1V0, B3KRB7, B2RA70, P01023
3	GO:0065009	regulation of molecular function	Biological Process	18	A8MW49, B4E1V0, Q8N4P8, Q96RG4, Q9P1Y5, Q71UM5, Q8IZZ8, B7Z8R6, Q5T123, G3V1D1, Q96HP0, B4DUP5, B2R4U3, H7C5E8, Q9ULW0, B3KRB7, B2RA70, P01023
3	GO:0003006	developmental process involved in reproduction	Biological Process	1	B4DUP5
3	GO:0007623	circadian rhythm	Biological Process	1	A0A024RDF4
3	GO:0016043	cellular component organization	Biological Process	39	Q9Y3U8, B4E1V0, C9K025, Q71UM5, Q9BVP2, P62081, P11388, Q96HP0, P50914, B2R4U3, A0A087WXM6, P39023, A8K7A2, H7C5E8, B4DQK1, Q9ULW0, B3KRB7, P07477, Q99988, F1JVV5, Q6FHK1, S4R456, A8MW49, Q12872, P60604, M0R0F0, Q9P1Y5, B7Z8R6, Q5T123, B0AZV9, Q5JXX1, P16402, A8K4B4, P62861, P63173, D3YTB1, H3BMQ2, B2RA70, P01023
3	GO:0040013	negative regulation of locomotion	Biological Process	1	Q8N4P8
3	GO:0048856	anatomical structure development	Biological Process	26	Q13895, B4E1V0, O75487, B4DMX4, Q53RD8, P11388, Q96HP0, A0A1B0GVI7, I3L2L5, B1ALI9, B3KRB7, I3L1D4, Q15125, P07477, Q92876, Q99988, F1JVV5, B7Z2S5, O00458, Q16678, Q9P1Y5, B7Z8R6, A0A024RDF4, D6RBJ7, B4DUP5, B2RA70
3	GO:0044033	multi-organism metabolic process	Biological Process	15	Q9Y3U8, S4R456, C9K025, M0R0F0, Q71UM5, P62081, P11388, P62861, K7ER90, Q6IAM0, P63173, P50914, A0A087WXM6, P39023, D3YTB1
3	GO:0051716	cellular response to stimulus	Biological Process	39	Q13895, A0A087WVA8, Q96RG4, B4E1V0, G5E9A6, Q71UM5, Q9BW34, P11388, Q96HP0, Q8TDD1, A0A1B0GVI7, B2R4U3, H7C5E8, B4DQK1, B1ALI9, Q9ULW0, B3KRB7, Q15125, F1JVV5, Q99988, Q92876, Q7Z6E9, O15173, A8MW49, P60604, Q16678, A0A024RDF4, B7Z8R6, Q5T123, B3KQT6, Q9Y6H1, B4DE48, F6KPG5, Q5JXX1, A8YQF4, B4DUP5, P63218, B2RA70, P01023
3	GO:0065008	regulation of biological quality	Biological Process	28	B4E1V0, Q96RG4, Q9BVP2, B7Z8Q4, G3V1D1, B4DMX4, Q53RD8, Q96HP0, A0A1B0GVI7, B2R4U3, H7C5E8, B4DQK1, Q15125, P48506, Q99988, Q92876, B7Z2S5, Q8N4P8, M0R0F0, Q16678, Q8IZZ8, A0A024RDF4, D6RBJ7, Q5T123, F6KPG5, P16402, B2RA70, P01023
3	GO:1904950	negative regulation of establishment of protein localization	Biological Process	1	P60604
3	GO:0032504	multicellular organism reproduction	Biological Process	1	B4DUP5
3	GO:0031294	lymphocyte costimulation	Biological Process	1	B2RA70
3	GO:0042752	regulation of circadian rhythm	Biological Process	1	A0A024RDF4
3	GO:0030155	regulation of cell adhesion	Biological Process	4	Q8N4P8, P07477, Q53RD8, B2RA70
3	GO:0001776	leukocyte homeostasis	Biological Process	1	Q53RD8
3	GO:1903829	positive regulation of cellular protein localization	Biological Process	1	Q9BVP2
3	GO:0022602	ovulation cycle process	Biological Process	1	B4DUP5
3	GO:0023056	positive regulation of signaling	Biological Process	7	B4E1V0, Q96RG4, Q9BW34, B3KRB7, Q99988, Q92876, B2RA70
3	GO:0003008	system process	Biological Process	3	Q16678, P48506, B2RA70
3	GO:0072376	protein activation cascade	Biological Process	2	Q8IZZ8, P01023
3	GO:0023051	regulation of signaling	Biological Process	11	B4E1V0, Q96RG4, Q9BW34, B7Z8R6, H7C5E8, Q9ULW0, B3KRB7, Q92876, B2RA70, Q99988, P01023
3	GO:0042698	ovulation cycle	Biological Process	1	B4DUP5
3	GO:0044764	multi-organism cellular process	Biological Process	21	Q9Y3U8, S4R456, A8MW49, C9K025, M0R0F0, B4E1V0, Q71UM5, P62081, F6KPG5, P11388, P62861, K7ER90, Q6IAM0, P63173, P50914, A0A087WXM6, P39023, H7C5E8, D3YTB1, B4DQK1, B3KRB7
3	GO:0023057	negative regulation of signaling	Biological Process	3	B4E1V0, B7Z8R6, B2RA70
3	GO:0051093	negative regulation of developmental process	Biological Process	3	B4E1V0, Q53RD8, Q99988
4	GO:0051301	cell division	Biological Process	2	A8K4B4, B1ALI9
4	GO:0001541	ovarian follicle development	Biological Process	1	B4DUP5
4	GO:0010876	lipid localization	Biological Process	2	Q96RG4, F6KPG5
4	GO:0048525	negative regulation of viral process	Biological Process	2	B4E1V0, H7C5E8
4	GO:0050878	regulation of body fluid levels	Biological Process	4	Q8IZZ8, B2RA70, Q96HP0, P01023
4	GO:1901615	organic hydroxy compound metabolic process	Biological Process	5	Q16678, D6RBJ7, B3KRC6, B4DE48, Q15125
4	GO:0060041	retina development in camera-type eye	Biological Process	1	Q16678
4	GO:0003013	circulatory system process	Biological Process	2	P48506, B2RA70
4	GO:0044092	negative regulation of molecular function	Biological Process	7	A8MW49, B4E1V0, Q8N4P8, Q9P1Y5, B2R4U3, B3KRB7, B2RA70
4	GO:0051341	regulation of oxidoreductase activity	Biological Process	1	G3V1D1
4	GO:0070727	cellular macromolecule localization	Biological Process	16	Q9Y3U8, S4R456, P60604, C9K025, M0R0F0, Q9BVP2, Q71UM5, P62081, P16402, P62861, P63173, P50914, A0A087WXM6, P39023, D3YTB1, B3KRB7
4	GO:0032970	regulation of actin filament-based process	Biological Process	2	Q5T123, B2RA70
4	GO:0044711	single-organism biosynthetic process	Biological Process	6	O00767, Q96RG4, B4DE67, A0A140VJE0, B3KRC6, Q15125
4	GO:0071495	cellular response to endogenous stimulus	Biological Process	5	Q8TDD1, Q96RG4, P63218, B2RA70, Q99988
4	GO:0009725	response to hormone	Biological Process	5	Q8TDD1, Q96RG4, P63218, P48506, B2RA70
4	GO:0009888	tissue development	Biological Process	6	Q16678, I3L2L5, B1ALI9, B3KRB7, Q99988, Q92876
4	GO:0051173	positive regulation of nitrogen compound metabolic process	Biological Process	11	A0A1B0GVI7, Q9BVP2, Q71UM5, B3KMT5, A0A024RDF4, Q9Y6H1, B3KRB7, Q53RD8, I3L1D4, P11388, F1JVV5
4	GO:0072378	blood coagulation, fibrin clot formation	Biological Process	2	Q8IZZ8, P01023
4	GO:1903573	negative regulation of response to endoplasmic reticulum stress	Biological Process	1	P60604
4	GO:0043062	extracellular structure organization	Biological Process	2	P07477, P01023
4	GO:0007062	sister chromatid cohesion	Biological Process	2	Q71UM5, A8K7A2
4	GO:0007597	blood coagulation, intrinsic pathway	Biological Process	2	Q8IZZ8, P01023
4	GO:0042594	response to starvation	Biological Process	2	B4DQK1, F6KPG5
4	GO:0005984	disaccharide metabolic process	Biological Process	1	O60701
4	GO:0009611	response to wounding	Biological Process	5	Q8IZZ8, B2RA70, Q92876, Q96HP0, P01023
4	GO:0051782	negative regulation of cell division	Biological Process	1	B1ALI9
4	GO:0060348	bone development	Biological Process	1	B4E1V0
4	GO:0043954	cellular component maintenance	Biological Process	1	Q9P1Y5
4	GO:0042180	cellular ketone metabolic process	Biological Process	1	Q96RG4
4	GO:0055114	oxidation-reduction process	Biological Process	9	O00767, O60701, P09669, Q96RG4, Q16678, P31350, B3KRC6, A0A024R172, B7Z2S5
4	GO:0009991	response to extracellular stimulus	Biological Process	2	B4DQK1, F6KPG5
4	GO:0090317	negative regulation of intracellular protein transport	Biological Process	1	P60604
4	GO:0060255	regulation of macromolecule metabolic process	Biological Process	40	B4E1V0, Q96RG4, G5E9A6, Q71UM5, Q9BW34, Q9BVP2, P31350, Q53RD8, P11388, Q8TDD1, A0A1B0GVI7, B2R4U3, H7C5E8, B4DQK1, Q9ULW0, B3KRB7, I3L1D4, P48506, Q99988, F1JVV5, Q7Z6E9, A8MW49, Q12872, P60604, Q8N4P8, M0R0F0, Q16678, B3KMT5, Q13823, Q8IZZ8, A0A024RDF4, B7Z8R6, Q9Y6H1, P16402, K7ER90, Q6IAM0, B4DUP5, B2RA70, Q15397, P01023
4	GO:0006629	lipid metabolic process	Biological Process	14	O00767, A0A087WVA8, A8MW49, Q96RG4, B3KM35, Q16678, D6RBJ7, O75487, B4DE67, B4DE48, Q5HYD9, B3KRC6, Q15125, A0A024R172
4	GO:0010256	endomembrane system organization	Biological Process	1	B3KRB7
4	GO:0019725	cellular homeostasis	Biological Process	7	B4E1V0, B7Z8Q4, B2R4U3, H7C5E8, G3V1D1, P48506, B7Z2S5
4	GO:0039694	viral RNA genome replication	Biological Process	1	P11388
4	GO:0051090	regulation of sequence-specific DNA binding transcription factor activity	Biological Process	2	B4E1V0, B3KRB7
4	GO:0022613	ribonucleoprotein complex biogenesis	Biological Process	26	Q9Y3U8, O95478, Q13895, C9K025, Q6DKI1, Q71UM5, P62081, Q9H9Y2, B2R823, P50914, A0A0A0MRW6, A0A087WXM6, P39023, Q6FHK1, S4R456, Q12872, M0R0F0, Q8IY37, Q8TDN6, B3KS36, Q9NY93, Q9BVJ6, P62861, P63173, D3YTB1, H3BMQ2
4	GO:0051186	cofactor metabolic process	Biological Process	3	O00767, B3KMT5, Q5T440
4	GO:0006413	translational initiation	Biological Process	15	Q9Y3U8, S4R456, C9K025, M0R0F0, Q71UM5, P62081, K7ER90, Q6IAM0, P62861, B4DUP5, P63173, P50914, A0A087WXM6, P39023, D3YTB1
4	GO:0051607	defense response to virus	Biological Process	2	A8MW49, B4DQK1
4	GO:0006790	sulfur compound metabolic process	Biological Process	4	O00767, B3KM35, Q4G148, P48506
4	GO:0009890	negative regulation of biosynthetic process	Biological Process	6	A0A1B0GVI7, Q8N4P8, Q53RD8, P48506, B2RA70, P16402
4	GO:0010948	negative regulation of cell cycle process	Biological Process	1	Q71UM5
4	GO:0032989	cellular component morphogenesis	Biological Process	1	B2RA70
4	GO:0031325	positive regulation of cellular metabolic process	Biological Process	19	Q96RG4, B4E1V0, Q9BVP2, Q71UM5, B3KMT5, A0A024RDF4, Q9Y6H1, Q53RD8, P11388, P16402, A0A1B0GVI7, B2R4U3, B4DQK1, Q9ULW0, B3KRB7, I3L1D4, F1JVV5, B2RA70, Q99988
4	GO:0044770	cell cycle phase transition	Biological Process	4	Q71UM5, B2R4U3, P31350, Q9ULW0
4	GO:1902115	regulation of organelle assembly	Biological Process	1	B2RA70
4	GO:0051817	modification of morphology or physiology of other organism involved in symbiotic interaction	Biological Process	3	B4E1V0, B4DQK1, F6KPG5
4	GO:1901698	response to nitrogen compound	Biological Process	4	Q96RG4, A0A024RDF4, P63218, B2RA70
4	GO:0043414	macromolecule methylation	Biological Process	1	P16402
4	GO:2000258	negative regulation of protein activation cascade	Biological Process	1	P01023
4	GO:0006956	complement activation	Biological Process	1	P01023
4	GO:0034763	negative regulation of transmembrane transport	Biological Process	1	Q96RG4
4	GO:0051222	positive regulation of protein transport	Biological Process	1	B2RA70
4	GO:0019748	secondary metabolic process	Biological Process	1	Q16678
4	GO:0098763	mitotic cell cycle phase	Biological Process	3	Q71UM5, B2R4U3, A8K7A2
4	GO:0050790	regulation of catalytic activity	Biological Process	16	A8MW49, B4E1V0, Q96RG4, Q8N4P8, Q9P1Y5, Q71UM5, Q8IZZ8, Q5T123, G3V1D1, Q96HP0, B4DUP5, B2R4U3, Q9ULW0, B3KRB7, B2RA70, P01023
4	GO:0060759	regulation of response to cytokine stimulus	Biological Process	1	B3KRB7
4	GO:0070482	response to oxygen levels	Biological Process	3	A8MW49, B4DQK1, Q9Y6H1
4	GO:0008285	negative regulation of cell proliferation	Biological Process	3	Q8N4P8, G3V1D1, B2RA70
4	GO:0009889	regulation of biosynthetic process	Biological Process	26	Q96RG4, B4E1V0, Q71UM5, Q9BW34, Q9BVP2, P31350, Q53RD8, Q8TDD1, A0A1B0GVI7, I3L1D4, B3KRB7, P48506, Q99988, F1JVV5, Q7Z6E9, Q8N4P8, M0R0F0, B3KMT5, A0A024RDF4, Q9Y6H1, P16402, K7ER90, Q6IAM0, B4DUP5, B2RA70, Q15397
4	GO:0019538	protein metabolic process	Biological Process	49	Q9Y3U8, Q9ULR3, C9K025, Q71UM5, Q9BW34, Q6DKI1, P62081, A0A087WXM6, P39023, B4DMI9, Q9ULW0, B3KRB7, P07477, S4R456, A0A024RDF4, B7Z8R6, P63173, P01023, Q15397, G5E9A6, Q96RG4, B4E1V0, Q9BVP2, Q53EY9, P11388, P50914, B2R4U3, A8K7A2, B4DQK1, Q99988, Q92876, Q6FHK1, Q7Z6E9, A8MW49, P60604, M0R0F0, Q8N4P8, Q8IZZ8, Q8TB52, Q4G148, B3KS36, Q5JXX1, P16402, K7ER90, Q6IAM0, P62861, B4DUP5, D3YTB1, B2RA70
4	GO:0048514	blood vessel morphogenesis	Biological Process	1	Q16678
4	GO:2000145	regulation of cell motility	Biological Process	3	Q8N4P8, Q5T123, B2RA70
4	GO:0031668	cellular response to extracellular stimulus	Biological Process	2	B4DQK1, F6KPG5
4	GO:0010646	regulation of cell communication	Biological Process	11	B4E1V0, Q96RG4, Q9BW34, B7Z8R6, H7C5E8, Q9ULW0, B3KRB7, Q92876, B2RA70, Q99988, P01023
4	GO:0051271	negative regulation of cellular component movement	Biological Process	1	Q8N4P8
4	GO:0008219	cell death	Biological Process	14	A8MW49, Q9BW34, Q71UM5, F6KPG5, Q53RD8, P11388, A0A1B0GVI7, B4DQK1, B3KRB7, P48506, B2RA70, Q92876, Q99988, F6TR53
4	GO:0072593	reactive oxygen species metabolic process	Biological Process	1	Q16678
4	GO:0002696	positive regulation of leukocyte activation	Biological Process	1	B2RA70
4	GO:0022603	regulation of anatomical structure morphogenesis	Biological Process	2	B2RA70, Q99988
4	GO:0015980	energy derivation by oxidation of organic compounds	Biological Process	2	P09669, Q96RG4
4	GO:0045596	negative regulation of cell differentiation	Biological Process	2	B4E1V0, Q53RD8
4	GO:0051236	establishment of RNA localization	Biological Process	1	A0A024RDF4
4	GO:0045913	positive regulation of carbohydrate metabolic process	Biological Process	1	Q96RG4
4	GO:0051640	organelle localization	Biological Process	5	S4R456, A8K4B4, A8K7A2, B0AZV9, F6KPG5
4	GO:0033687	osteoblast proliferation	Biological Process	1	B4E1V0
4	GO:0019080	viral gene expression	Biological Process	14	Q9Y3U8, S4R456, C9K025, M0R0F0, Q71UM5, P62081, P62861, K7ER90, Q6IAM0, P63173, P50914, A0A087WXM6, P39023, D3YTB1
4	GO:0009894	regulation of catabolic process	Biological Process	5	P60604, Q96RG4, B3KMT5, B2R4U3, B4DQK1
4	GO:0045595	regulation of cell differentiation	Biological Process	9	B4E1V0, H7C5E8, I3L2L5, B3KRB7, Q53RD8, B2RA70, Q99988, Q92876, F1JVV5
4	GO:0002698	negative regulation of immune effector process	Biological Process	1	P01023
4	GO:0044403	symbiosis, encompassing mutualism through parasitism	Biological Process	21	Q9Y3U8, S4R456, A8MW49, B4E1V0, C9K025, M0R0F0, Q71UM5, P62081, F6KPG5, P11388, K7ER90, Q6IAM0, P62861, P63173, P50914, A0A087WXM6, P39023, H7C5E8, D3YTB1, B4DQK1, B3KRB7
4	GO:0043207	response to external biotic stimulus	Biological Process	8	A8MW49, P62861, B4E1V0, B7Z8R6, H7C5E8, B4DQK1, B3KRB7, B2RA70
4	GO:0055093	response to hyperoxia	Biological Process	1	B4DQK1
4	GO:0071216	cellular response to biotic stimulus	Biological Process	2	B4E1V0, B1ALI9
4	GO:0051649	establishment of localization in cell	Biological Process	18	Q9Y3U8, S4R456, P60604, C9K025, M0R0F0, Q71UM5, P62081, B0AZV9, B4DE48, A8K4B4, P62861, P63173, P50914, A0A087WXM6, P39023, A8K7A2, D3YTB1, B2RA70
4	GO:0080134	regulation of response to stress	Biological Process	9	A8MW49, P60604, B4E1V0, Q8IZZ8, B7Z8R6, Q9Y6H1, B3KRB7, B2RA70, P01023
4	GO:0001887	selenium compound metabolic process	Biological Process	1	B7Z2S5
4	GO:0061061	muscle structure development	Biological Process	1	O00458
4	GO:0051129	negative regulation of cellular component organization	Biological Process	2	B3KRB7, B2RA70
4	GO:0033554	cellular response to stress	Biological Process	14	A8MW49, P60604, Q16678, Q71UM5, B7Z8R6, Q9Y6H1, F6KPG5, Q5JXX1, P11388, B2R4U3, B4DQK1, B3KRB7, B2RA70, Q7Z6E9
4	GO:0001558	regulation of cell growth	Biological Process	2	P07477, P16402
4	GO:0043903	regulation of symbiosis, encompassing mutualism through parasitism	Biological Process	4	A8MW49, B4E1V0, H7C5E8, P11388
4	GO:0007165	signal transduction	Biological Process	24	O15173, A0A087WVA8, Q96RG4, B4E1V0, Q71UM5, Q9BW34, B7Z8R6, Q5T123, B4DE48, Q96HP0, Q8TDD1, A8YQF4, A0A1B0GVI7, B2R4U3, H7C5E8, P63218, Q9ULW0, B3KRB7, Q15125, B2RA70, Q99988, Q92876, F1JVV5, P01023
4	GO:2000026	regulation of multicellular organismal development	Biological Process	6	B4E1V0, I3L2L5, B3KRB7, Q53RD8, B2RA70, Q99988
4	GO:0045184	establishment of protein localization	Biological Process	18	Q9Y3U8, S4R456, P60604, C9K025, M0R0F0, Q71UM5, P62081, B4DE48, P16402, P62861, P63173, P50914, A0A087WXM6, P39023, H7C5E8, D3YTB1, B3KRB7, B2RA70
4	GO:0071214	cellular response to abiotic stimulus	Biological Process	1	Q9BW34
4	GO:0010634	positive regulation of epithelial cell migration	Biological Process	1	B2RA70
4	GO:0010647	positive regulation of cell communication	Biological Process	7	B4E1V0, Q96RG4, Q9BW34, B3KRB7, Q99988, Q92876, B2RA70
4	GO:0035988	chondrocyte proliferation	Biological Process	1	B4E1V0
4	GO:0051883	killing of cells in other organism involved in symbiotic interaction	Biological Process	1	F6KPG5
4	GO:0030193	regulation of blood coagulation	Biological Process	1	Q8IZZ8
4	GO:0006486	protein glycosylation	Biological Process	3	P60604, Q4G148, Q15397
4	GO:0051238	sequestering of metal ion	Biological Process	1	G3V1D1
4	GO:0042127	regulation of cell proliferation	Biological Process	7	A0A1B0GVI7, Q96RG4, B4E1V0, Q8N4P8, H7C5E8, G3V1D1, B2RA70
4	GO:0051726	regulation of cell cycle	Biological Process	5	A8K4B4, Q8N4P8, Q71UM5, B2R4U3, Q9ULW0
4	GO:0050877	neurological system process	Biological Process	1	Q16678
4	GO:1902589	single-organism organelle organization	Biological Process	10	A8K4B4, A8MW49, Q71UM5, Q9P1Y5, A8K7A2, Q5T123, B4DQK1, Q9ULW0, B3KRB7, B2RA70
4	GO:0009615	response to virus	Biological Process	3	A8MW49, B4DQK1, B3KRB7
4	GO:0046677	response to antibiotic	Biological Process	1	Q53RD8
4	GO:0007275	multicellular organism development	Biological Process	23	Q13895, B4E1V0, Q16678, Q9P1Y5, B7Z8R6, A0A024RDF4, D6RBJ7, O75487, B4DMX4, Q53RD8, P11388, Q96HP0, B4DUP5, A0A1B0GVI7, I3L2L5, B1ALI9, B3KRB7, I3L1D4, Q15125, B2RA70, Q92876, Q99988, F1JVV5
4	GO:0051302	regulation of cell division	Biological Process	1	B1ALI9
4	GO:0000422	mitophagy	Biological Process	2	A8MW49, B4DQK1
4	GO:0001817	regulation of cytokine production	Biological Process	2	B4E1V0, H7C5E8
4	GO:0043170	macromolecule metabolic process	Biological Process	79	Q9Y3U8, O95478, Q9ULR3, C9K025, Q71UM5, Q9BW34, Q6DKI1, Q9BWT3, P62081, Q53RD8, Q8TDD1, B4DTK6, B2R823, A0A1B0GVI7, A0A0A0MRW6, A0A087WXM6, P39023, B4DMI9, Q9ULW0, I3L1D4, P07477, B3KRB7, S4R456, Q12872, Q16678, A0A024RDF4, B7Z8R6, Q9Y6H1, F6KPG5, Q9NY93, P63173, Q15397, P01023, Q13895, Q8NEF9, G5E9A6, B4E1V0, Q96RG4, Q9BVP2, O75487, P31350, Q53EY9, P11388, Q9H9Y2, O60701, P50914, B2R4U3, H7C5E8,…
4	GO:0022407	regulation of cell-cell adhesion	Biological Process	3	Q8N4P8, Q53RD8, B2RA70
4	GO:0060341	regulation of cellular localization	Biological Process	3	P60604, Q9BVP2, B2RA70
4	GO:0001101	response to acid chemical	Biological Process	1	B2RA70
4	GO:0048524	positive regulation of viral process	Biological Process	1	P11388
4	GO:0044093	positive regulation of molecular function	Biological Process	8	B4E1V0, Q71UM5, B2R4U3, Q5T123, G3V1D1, Q9ULW0, B3KRB7, B2RA70
4	GO:0006091	generation of precursor metabolites and energy	Biological Process	3	P09669, Q96RG4, B3KMT5
4	GO:0005975	carbohydrate metabolic process	Biological Process	4	O60701, Q96RG4, B3KM35, B3KMT5
4	GO:0010564	regulation of cell cycle process	Biological Process	4	A8K4B4, Q71UM5, B2R4U3, Q9ULW0
4	GO:1990267	response to transition metal nanoparticle	Biological Process	1	H7C5E8
4	GO:1901135	carbohydrate derivative metabolic process	Biological Process	11	O60701, P09669, P60604, B3KM35, B3KMT5, Q4G148, O75487, P31350, A0A140VJE0, Q5T985, Q15397
4	GO:0046649	lymphocyte activation	Biological Process	4	A0A1B0GVI7, Q53RD8, B2RA70, Q96HP0
4	GO:0050865	regulation of cell activation	Biological Process	3	A0A1B0GVI7, Q53RD8, B2RA70
4	GO:0006952	defense response	Biological Process	10	A8MW49, P62861, B4E1V0, A8YQF4, H7C5E8, B7Z8R6, B4DQK1, B3KRB7, B2RA70, P01023
4	GO:0034330	cell junction organization	Biological Process	2	Q9P1Y5, B3KRB7
4	GO:0090066	regulation of anatomical structure size	Biological Process	2	Q5T123, P48506
4	GO:0051322	anaphase	Biological Process	3	Q71UM5, B2R4U3, A8K7A2
4	GO:0010035	response to inorganic substance	Biological Process	3	A8MW49, Q16678, H7C5E8
4	GO:0000279	M phase	Biological Process	3	Q71UM5, B2R4U3, A8K7A2
4	GO:0031349	positive regulation of defense response	Biological Process	3	B4E1V0, B3KRB7, B2RA70
4	GO:0019884	antigen processing and presentation of exogenous antigen	Biological Process	1	A8YQF4
4	GO:2000021	regulation of ion homeostasis	Biological Process	1	B2RA70
4	GO:0042391	regulation of membrane potential	Biological Process	1	B2RA70
4	GO:0044260	cellular macromolecule metabolic process	Biological Process	71	Q9Y3U8, O95478, Q9ULR3, C9K025, Q71UM5, Q9BW34, Q6DKI1, Q9BWT3, P62081, Q53RD8, Q8TDD1, B4DTK6, B2R823, A0A1B0GVI7, A0A0A0MRW6, A0A087WXM6, P39023, B4DMI9, Q9ULW0, B3KRB7, I3L1D4, S4R456, Q12872, A0A024RDF4, B7Z8R6, Q9Y6H1, Q9NY93, P63173, Q15397, P01023, Q13895, Q8NEF9, G5E9A6, B4E1V0, Q96RG4, Q9BVP2, P31350, Q53EY9, P11388, Q9H9Y2, O60701, P50914, B2R4U3, A8K7A2, B4DQK1, P48506, Q99988, F1JVV5,…
4	GO:0006928	movement of cell or subcellular component	Biological Process	5	Q8N4P8, Q5T123, O75487, P07477, B2RA70
4	GO:0048534	hematopoietic or lymphoid organ development	Biological Process	2	Q53RD8, B2RA70
4	GO:1901360	organic cyclic compound metabolic process	Biological Process	61	Q9Y3U8, O95478, C9K025, Q9BW34, Q71UM5, Q6DKI1, Q9BWT3, P62081, Q53RD8, Q8TDD1, B4DTK6, B2R823, A0A1B0GVI7, A0A0A0MRW6, A0A087WXM6, P39023, A0A140VJE0, I3L1D4, B3KRB7, P07477, S4R456, Q12872, Q16678, A0A024RDF4, B7Z8R6, B4DE67, Q9Y6H1, Q9NY93, P63173, B3KRC6, P09669, Q13895, Q8NEF9, B4E1V0, Q9BVP2, P31350, P11388, Q9H9Y2, O60701, P50914, B2R4U3, Q15125, P48506, F1JVV5, Q99988, B7Z2S5, Q7Z6E9, Q8N…
4	GO:0010993	regulation of ubiquitin homeostasis	Biological Process	1	B2R4U3
4	GO:0051272	positive regulation of cellular component movement	Biological Process	1	B2RA70
4	GO:0010828	positive regulation of glucose transport	Biological Process	1	Q96RG4
4	GO:0050867	positive regulation of cell activation	Biological Process	1	B2RA70
4	GO:0032102	negative regulation of response to external stimulus	Biological Process	1	B4E1V0
4	GO:0051130	positive regulation of cellular component organization	Biological Process	6	A8K4B4, Q9BVP2, B2R4U3, H7C5E8, B2RA70, P16402
4	GO:0098609	cell-cell adhesion	Biological Process	5	Q8N4P8, Q9P1Y5, Q53RD8, B2RA70, Q96HP0
4	GO:0042710	biofilm formation	Biological Process	1	B4E1V0
4	GO:0009887	animal organ morphogenesis	Biological Process	1	B4E1V0
4	GO:0032535	regulation of cellular component size	Biological Process	1	Q5T123
4	GO:0045454	cell redox homeostasis	Biological Process	3	B4E1V0, P48506, B7Z2S5
4	GO:0006903	vesicle targeting	Biological Process	1	B0AZV9
4	GO:0007267	cell-cell signaling	Biological Process	1	Q99988
4	GO:0010033	response to organic substance	Biological Process	15	Q13895, P60604, B4E1V0, Q96RG4, Q16678, A0A024RDF4, Q8TDD1, A8YQF4, A0A1B0GVI7, P63218, B3KRB7, P48506, F1JVV5, B2RA70, Q99988
4	GO:0080090	regulation of primary metabolic process	Biological Process	37	Q96RG4, B4E1V0, Q71UM5, Q9BW34, Q9BVP2, P31350, Q53RD8, P11388, A0A1B0GVI7, B2R4U3, H7C5E8, B4DQK1, Q9ULW0, B3KRB7, I3L1D4, P48506, Q99988, F1JVV5, Q7Z6E9, A8MW49, Q12872, P60604, Q8N4P8, M0R0F0, B3KMT5, Q13823, Q8IZZ8, A0A024RDF4, B7Z8R6, Q9Y6H1, P16402, K7ER90, Q6IAM0, B4DUP5, B2RA70, Q15397, P01023
4	GO:0006979	response to oxidative stress	Biological Process	4	A8MW49, Q16678, P48506, B7Z2S5
4	GO:0010243	response to organonitrogen compound	Biological Process	3	Q96RG4, P63218, B2RA70
4	GO:0070489	T cell aggregation	Biological Process	3	Q53RD8, B2RA70, Q96HP0
4	GO:0006805	xenobiotic metabolic process	Biological Process	2	A0A1B0GVI7, Q16678
4	GO:0032387	negative regulation of intracellular transport	Biological Process	1	P60604
4	GO:0006082	organic acid metabolic process	Biological Process	10	O00767, Q96RG4, Q16678, B3KMT5, B4DE67, B3KRC6, B3KRB7, P48506, A0A024R172, Q5HYD9
4	GO:0045597	positive regulation of cell differentiation	Biological Process	3	B4E1V0, B2RA70, Q99988
4	GO:0007162	negative regulation of cell adhesion	Biological Process	2	Q8N4P8, Q53RD8
4	GO:0032940	secretion by cell	Biological Process	4	H7C5E8, F6KPG5, B2RA70, P01023
4	GO:0007049	cell cycle	Biological Process	8	A8K4B4, Q8N4P8, Q71UM5, B2R4U3, A8K7A2, P31350, Q9ULW0, P11388
4	GO:1903707	negative regulation of hemopoiesis	Biological Process	1	Q53RD8
4	GO:0002218	activation of innate immune response	Biological Process	3	B4E1V0, B3KRB7, B2RA70
4	GO:0051049	regulation of transport	Biological Process	6	P60604, Q96RG4, H7C5E8, B3KQT6, Q86U90, B2RA70
4	GO:0031348	negative regulation of defense response	Biological Process	1	P01023
4	GO:0051047	positive regulation of secretion	Biological Process	1	B2RA70
4	GO:0030278	regulation of ossification	Biological Process	1	B4E1V0
4	GO:0044802	single-organism membrane organization	Biological Process	13	Q9Y3U8, S4R456, C9K025, M0R0F0, Q71UM5, P62081, P62861, P63173, P50914, A0A087WXM6, P39023, D3YTB1, B3KRB7
4	GO:0002832	negative regulation of response to biotic stimulus	Biological Process	1	B4E1V0
4	GO:0002757	immune response-activating signal transduction	Biological Process	3	B4E1V0, B3KRB7, B2RA70
4	GO:0032880	regulation of protein localization	Biological Process	3	P60604, Q9BVP2, B2RA70
4	GO:0007272	ensheathment of neurons	Biological Process	1	B4DUP5
4	GO:0090130	tissue migration	Biological Process	3	Q5T123, P07477, B2RA70
4	GO:0050776	regulation of immune response	Biological Process	5	B4E1V0, A8YQF4, B3KRB7, B2RA70, P01023
4	GO:0016337	single organismal cell-cell adhesion	Biological Process	5	Q8N4P8, Q9P1Y5, Q53RD8, B2RA70, Q96HP0
4	GO:0032204	regulation of telomere maintenance	Biological Process	2	Q9BVP2, B2RA70
4	GO:0009891	positive regulation of biosynthetic process	Biological Process	10	Q96RG4, A0A1B0GVI7, Q9BVP2, B3KMT5, Q71UM5, A0A024RDF4, Q9Y6H1, B3KRB7, Q53RD8, F1JVV5
4	GO:0051651	maintenance of location in cell	Biological Process	2	G3V1D1, F6KPG5
4	GO:0071166	ribonucleoprotein complex localization	Biological Process	1	S4R456
4	GO:0006996	organelle organization	Biological Process	17	A8MW49, Q9BVP2, Q71UM5, Q9P1Y5, Q5T123, B0AZV9, P11388, P16402, Q96HP0, A8K4B4, B2R4U3, A8K7A2, B4DQK1, Q9ULW0, B3KRB7, B2RA70, Q6FHK1
4	GO:0051701	interaction with host	Biological Process	2	B4DQK1, F6KPG5
4	GO:0022411	cellular component disassembly	Biological Process	7	A8MW49, Q5T123, B4DQK1, P07477, P11388, P01023, Q6FHK1
4	GO:0006139	nucleobase-containing compound metabolic process	Biological Process	53	Q9Y3U8, O95478, C9K025, Q9BW34, Q71UM5, Q6DKI1, Q9BWT3, P62081, Q53RD8, Q8TDD1, B4DTK6, B2R823, A0A1B0GVI7, A0A0A0MRW6, A0A087WXM6, P39023, A0A140VJE0, I3L1D4, B3KRB7, S4R456, Q12872, A0A024RDF4, Q9Y6H1, Q9NY93, P63173, P09669, Q13895, Q8NEF9, B4E1V0, Q9BVP2, P31350, P11388, Q9H9Y2, O60701, P50914, B2R4U3, P48506, F1JVV5, Q99988, B7Z2S5, Q7Z6E9, Q8N4P8, M0R0F0, B3KMT5, Q5T7U1, Q8IY37, Q5JXX1, B3K…
4	GO:0051656	establishment of organelle localization	Biological Process	4	S4R456, A8K4B4, A8K7A2, B0AZV9
4	GO:0000910	cytokinesis	Biological Process	1	A8K4B4
4	GO:0048869	cellular developmental process	Biological Process	17	O00458, S4R456, B4E1V0, Q8N4P8, Q9P1Y5, B7Z8R6, Q53RD8, Q96HP0, B4DUP5, H7C5E8, I3L2L5, B1ALI9, B3KRB7, B2RA70, Q92876, F1JVV5, Q99988
4	GO:0098542	defense response to other organism	Biological Process	5	A8MW49, P62861, B4E1V0, H7C5E8, B4DQK1
4	GO:0043114	regulation of vascular permeability	Biological Process	1	B2RA70
4	GO:0009620	response to fungus	Biological Process	1	B4E1V0
4	GO:0006793	phosphorus metabolic process	Biological Process	16	P09669, Q9ULR3, B4E1V0, Q96RG4, Q8N4P8, Q9P1Y5, B3KMT5, B7Z8R6, P31350, O60701, B4DMI9, A0A140VJE0, Q9ULW0, B3KRB7, Q99988, B2RA70
4	GO:0051098	regulation of binding	Biological Process	1	Q8N4P8
4	GO:0043487	regulation of RNA stability	Biological Process	1	A0A024RDF4
4	GO:0009968	negative regulation of signal transduction	Biological Process	3	B4E1V0, B7Z8R6, B2RA70
4	GO:0007548	sex differentiation	Biological Process	1	B4DUP5
4	GO:0009314	response to radiation	Biological Process	1	Q9BW34
4	GO:0050818	regulation of coagulation	Biological Process	1	Q8IZZ8
4	GO:0032369	negative regulation of lipid transport	Biological Process	1	Q96RG4
4	GO:1901888	regulation of cell junction assembly	Biological Process	1	B3KRB7
4	GO:0032205	negative regulation of telomere maintenance	Biological Process	1	B2RA70
4	GO:0071559	response to transforming growth factor beta	Biological Process	2	Q99988, B2RA70
4	GO:1903047	mitotic cell cycle process	Biological Process	6	A8K4B4, Q71UM5, B2R4U3, A8K7A2, P31350, Q9ULW0
4	GO:1901700	response to oxygen-containing compound	Biological Process	10	A8MW49, Q96RG4, B4E1V0, A0A1B0GVI7, Q16678, P63218, B1ALI9, B3KRB7, B2RA70, B7Z2S5
4	GO:0044262	cellular carbohydrate metabolic process	Biological Process	2	O60701, Q96RG4
4	GO:0002260	lymphocyte homeostasis	Biological Process	1	Q53RD8
4	GO:0070661	leukocyte proliferation	Biological Process	2	A0A1B0GVI7, B2RA70
4	GO:0045834	positive regulation of lipid metabolic process	Biological Process	1	Q96RG4
4	GO:0048608	reproductive structure development	Biological Process	1	B4DUP5
4	GO:0031295	T cell costimulation	Biological Process	1	B2RA70
4	GO:0022409	positive regulation of cell-cell adhesion	Biological Process	1	B2RA70
4	GO:0044068	modulation by symbiont of host cellular process	Biological Process	1	B4DQK1
4	GO:0009895	negative regulation of catabolic process	Biological Process	1	P60604
4	GO:0044407	single-species biofilm formation in or on host organism	Biological Process	1	B4E1V0
4	GO:0048002	antigen processing and presentation of peptide antigen	Biological Process	1	A8YQF4
4	GO:0046907	intracellular transport	Biological Process	16	Q9Y3U8, S4R456, P60604, C9K025, M0R0F0, Q71UM5, P62081, B0AZV9, B4DE48, P62861, P63173, P50914, A0A087WXM6, P39023, D3YTB1, B2RA70
4	GO:1903706	regulation of hemopoiesis	Biological Process	1	Q53RD8
4	GO:1901657	glycosyl compound metabolic process	Biological Process	3	P09669, B3KMT5, A0A140VJE0
4	GO:0034641	cellular nitrogen compound metabolic process	Biological Process	59	Q9Y3U8, O95478, C9K025, Q71UM5, Q9BW34, Q6DKI1, Q9BWT3, P62081, Q53RD8, Q8TDD1, B4DTK6, B2R823, A0A1B0GVI7, A0A0A0MRW6, A0A087WXM6, P39023, A0A140VJE0, B3KRB7, I3L1D4, S4R456, Q12872, Q16678, A0A024RDF4, Q9Y6H1, Q9NY93, P63173, Q15397, P09669, Q13895, Q8NEF9, B4E1V0, Q9BVP2, P31350, P11388, Q9H9Y2, O60701, P50914, B2R4U3, P48506, Q99988, F1JVV5, B7Z2S5, Q7Z6E9, Q6FHK1, M0R0F0, Q8N4P8, B3KMT5, Q5T…
4	GO:1901564	organonitrogen compound metabolic process	Biological Process	34	Q9Y3U8, A0A087WVA8, P09669, C9K025, Q71UM5, Q9BW34, Q6DKI1, O75487, P62081, O60701, P50914, A0A087WXM6, P39023, A0A140VJE0, B3KRB7, P07477, P48506, B7Z2S5, Q6FHK1, S4R456, B3KM35, M0R0F0, B3KMT5, Q4G148, A0A024RDF4, Q5T985, B3KS36, K7ER90, Q6IAM0, P62861, B4DUP5, P63173, D3YTB1, Q15397
4	GO:0034754	cellular hormone metabolic process	Biological Process	2	Q16678, Q15125
4	GO:0001503	ossification	Biological Process	3	S4R456, B4E1V0, Q8N4P8
4	GO:0002433	immune response-regulating cell surface receptor signaling pathway involved in phagocytosis	Biological Process	1	B2RA70
4	GO:0051702	interaction with symbiont	Biological Process	1	B4E1V0
4	GO:0044255	cellular lipid metabolic process	Biological Process	10	O00767, A0A087WVA8, A8MW49, Q96RG4, B3KM35, Q16678, O75487, B3KRC6, A0A024R172, Q5HYD9
4	GO:0044281	small molecule metabolic process	Biological Process	19	O00767, P09669, Q96RG4, Q16678, B3KMT5, D6RBJ7, B4DE67, P31350, B4DE48, Q5HYD9, O60701, A0A140VJE0, B3KRC6, B3KRB7, P07477, Q15125, P48506, A0A024R172, B7Z2S5
4	GO:0050866	negative regulation of cell activation	Biological Process	1	Q53RD8
4	GO:0019730	antimicrobial humoral response	Biological Process	2	P62861, B4E1V0
4	GO:0009967	positive regulation of signal transduction	Biological Process	6	B4E1V0, Q9BW34, B3KRB7, Q99988, Q92876, B2RA70
4	GO:0001816	cytokine production	Biological Process	2	B4E1V0, H7C5E8
4	GO:1904816	positive regulation of protein localization to chromosome, telomeric region	Biological Process	1	Q9BVP2
4	GO:0045787	positive regulation of cell cycle	Biological Process	2	A8K4B4, B2R4U3
4	GO:0045778	positive regulation of ossification	Biological Process	1	B4E1V0
4	GO:2000257	regulation of protein activation cascade	Biological Process	2	Q8IZZ8, P01023
4	GO:0035383	thioester metabolic process	Biological Process	1	O00767
4	GO:0006959	humoral immune response	Biological Process	4	P62861, B4E1V0, H7C5E8, P01023
4	GO:0032206	positive regulation of telomere maintenance	Biological Process	1	Q9BVP2
4	GO:0007017	microtubule-based process	Biological Process	3	A8K4B4, Q9P1Y5, Q9ULW0
4	GO:0032886	regulation of microtubule-based process	Biological Process	1	Q9P1Y5
4	GO:0007015	actin filament organization	Biological Process	2	Q5T123, B2RA70
4	GO:0006725	cellular aromatic compound metabolic process	Biological Process	55	Q9Y3U8, O95478, C9K025, Q9BW34, Q71UM5, Q6DKI1, Q9BWT3, P62081, Q53RD8, Q8TDD1, B4DTK6, B2R823, A0A1B0GVI7, A0A0A0MRW6, A0A087WXM6, P39023, A0A140VJE0, I3L1D4, B3KRB7, P07477, S4R456, Q12872, Q16678, A0A024RDF4, Q9Y6H1, Q9NY93, P63173, P09669, Q13895, Q8NEF9, B4E1V0, Q9BVP2, P31350, P11388, Q9H9Y2, O60701, P50914, B2R4U3, P48506, F1JVV5, Q99988, B7Z2S5, Q7Z6E9, Q8N4P8, M0R0F0, B3KMT5, Q5T7U1, Q8I…
4	GO:0009966	regulation of signal transduction	Biological Process	11	B4E1V0, Q96RG4, Q9BW34, B7Z8R6, H7C5E8, Q9ULW0, B3KRB7, Q92876, B2RA70, Q99988, P01023
4	GO:0007423	sensory organ development	Biological Process	1	Q16678
4	GO:0031324	negative regulation of cellular metabolic process	Biological Process	14	A8MW49, Q8N4P8, Q9P1Y5, B7Z8R6, A0A024RDF4, Q53RD8, P16402, A0A1B0GVI7, B2R4U3, B3KRB7, P48506, B2RA70, Q99988, P01023
4	GO:0006403	RNA localization	Biological Process	1	A0A024RDF4
4	GO:0051092	positive regulation of NF-kappaB transcription factor activity	Biological Process	2	B4E1V0, B3KRB7
4	GO:0032891	negative regulation of organic acid transport	Biological Process	1	Q96RG4
4	GO:0070887	cellular response to chemical stimulus	Biological Process	18	Q13895, A8MW49, P60604, B4E1V0, Q96RG4, Q16678, A0A024RDF4, Q9Y6H1, Q8TDD1, A8YQF4, A0A1B0GVI7, H7C5E8, P63218, B4DQK1, B3KRB7, F1JVV5, B2RA70, Q99988
4	GO:0097167	circadian regulation of translation	Biological Process	1	A0A024RDF4
4	GO:0016236	macroautophagy	Biological Process	2	A8MW49, B4DQK1
4	GO:0051715	cytolysis in other organism	Biological Process	1	F6KPG5
4	GO:0009896	positive regulation of catabolic process	Biological Process	3	Q96RG4, B2R4U3, B4DQK1
4	GO:0031334	positive regulation of protein complex assembly	Biological Process	1	B2RA70
4	GO:0044364	disruption of cells of other organism	Biological Process	1	F6KPG5
4	GO:0044765	single-organism transport	Biological Process	21	Q9Y3U8, S4R456, P09669, Q96RG4, C9K025, M0R0F0, Q71UM5, B7Z8Q4, D6RBJ7, P62081, F6KPG5, P62861, P63173, P50914, A0A087WXM6, P39023, H7C5E8, D3YTB1, Q15125, B2RA70, P01023
4	GO:0000075	cell cycle checkpoint	Biological Process	1	Q71UM5
4	GO:0002251	organ or tissue specific immune response	Biological Process	2	P62861, B4E1V0
4	GO:0050778	positive regulation of immune response	Biological Process	4	B4E1V0, B3KRB7, B2RA70, P01023
4	GO:0006081	cellular aldehyde metabolic process	Biological Process	1	Q16678
4	GO:0043933	macromolecular complex subunit organization	Biological Process	10	Q12872, P63173, B2R4U3, Q5T123, B0AZV9, H3BMQ2, Q5JXX1, B2RA70, P16402, Q6FHK1
4	GO:1903409	reactive oxygen species biosynthetic process	Biological Process	1	Q16678
4	GO:0044723	single-organism carbohydrate metabolic process	Biological Process	3	O60701, Q96RG4, B3KMT5
4	GO:0010604	positive regulation of macromolecule metabolic process	Biological Process	19	Q96RG4, B4E1V0, Q9BVP2, Q71UM5, B3KMT5, A0A024RDF4, Q9Y6H1, Q53RD8, P11388, P16402, A0A1B0GVI7, B2R4U3, B4DQK1, Q9ULW0, B3KRB7, I3L1D4, Q99988, F1JVV5, B2RA70
4	GO:0042493	response to drug	Biological Process	1	Q15125
4	GO:0048144	fibroblast proliferation	Biological Process	1	G3V1D1
4	GO:0010508	positive regulation of autophagy	Biological Process	1	B4DQK1
4	GO:0042592	homeostatic process	Biological Process	12	B4E1V0, Q96RG4, Q9BVP2, B7Z8Q4, G3V1D1, F6KPG5, Q53RD8, B2R4U3, H7C5E8, P48506, B2RA70, B7Z2S5
4	GO:0022607	cellular component assembly	Biological Process	9	Q12872, P63173, B2R4U3, B0AZV9, Q9ULW0, B3KRB7, H3BMQ2, B2RA70, P16402
4	GO:0010942	positive regulation of cell death	Biological Process	5	Q71UM5, B4DQK1, Q53RD8, P11388, B2RA70
4	GO:0045137	development of primary sexual characteristics	Biological Process	1	B4DUP5
4	GO:0060627	regulation of vesicle-mediated transport	Biological Process	2	H7C5E8, B2RA70
4	GO:0051171	regulation of nitrogen compound metabolic process	Biological Process	28	B4E1V0, Q9BVP2, Q71UM5, Q9BW34, P31350, Q53RD8, P11388, Q8TDD1, A0A1B0GVI7, B2R4U3, B3KRB7, I3L1D4, P48506, F1JVV5, Q99988, Q7Z6E9, Q12872, Q8N4P8, M0R0F0, B3KMT5, A0A024RDF4, Q9Y6H1, P16402, K7ER90, Q6IAM0, B4DUP5, B2RA70, Q15397
4	GO:0097194	execution phase of apoptosis	Biological Process	1	P11388
4	GO:0051224	negative regulation of protein transport	Biological Process	1	P60604
4	GO:0036503	ERAD pathway	Biological Process	1	P60604
4	GO:1903532	positive regulation of secretion by cell	Biological Process	1	B2RA70
4	GO:0048468	cell development	Biological Process	6	B4E1V0, B4DUP5, Q9P1Y5, B3KRB7, B2RA70, Q99988
4	GO:0006810	transport	Biological Process	33	Q9Y3U8, P09669, Q96RG4, C9K025, B4E1V0, Q71UM5, B7Z8Q4, P62081, G3V1D1, B4DMX4, Q6N075, P50914, A0A087WXM6, P39023, H7C5E8, Q86U90, Q15125, S4R456, A8MW49, P60604, M0R0F0, B7Z8R6, D6RBJ7, A0A024RDF4, B3KQT6, B0AZV9, B4DE48, F6KPG5, P62861, P63173, D3YTB1, B2RA70, P01023
4	GO:1901576	organic substance biosynthetic process	Biological Process	52	Q9Y3U8, C9K025, Q71UM5, Q9BW34, Q6DKI1, P62081, Q53RD8, Q8TDD1, B4DTK6, A0A1B0GVI7, A0A087WXM6, P39023, A0A140VJE0, I3L1D4, B3KRB7, S4R456, A0A024RDF4, B4DE67, Q9Y6H1, P63173, B3KRC6, Q15397, O00767, Q96RG4, B4E1V0, Q9BVP2, O75487, P31350, O60701, P50914, B4DQK1, Q15125, P48506, Q99988, F1JVV5, Q6FHK1, Q7Z6E9, P60604, B3KM35, Q8N4P8, M0R0F0, B3KMT5, Q4G148, Q5T7U1, B3KS36, P16402, K7ER90, Q6IAM0,…
4	GO:0051962	positive regulation of nervous system development	Biological Process	1	B2RA70
4	GO:0009408	response to heat	Biological Process	2	B4DUP5, P48506
4	GO:0051128	regulation of cellular component organization	Biological Process	13	B4E1V0, Q9BVP2, Q9P1Y5, Q5T123, P16402, A8K4B4, B2R4U3, H7C5E8, B4DQK1, P07477, B3KRB7, B2RA70, Q99988
4	GO:0050777	negative regulation of immune response	Biological Process	1	P01023
4	GO:1902580	single-organism cellular localization	Biological Process	15	Q9Y3U8, S4R456, C9K025, M0R0F0, Q71UM5, P62081, F6KPG5, A8K4B4, P62861, P63173, P50914, A0A087WXM6, P39023, D3YTB1, B3KRB7
4	GO:0001775	cell activation	Biological Process	4	A0A1B0GVI7, Q53RD8, B2RA70, Q96HP0
4	GO:0070085	glycosylation	Biological Process	3	P60604, Q4G148, Q15397
4	GO:0008284	positive regulation of cell proliferation	Biological Process	4	B4E1V0, Q96RG4, G3V1D1, B2RA70
4	GO:0002694	regulation of leukocyte activation	Biological Process	3	A0A1B0GVI7, Q53RD8, B2RA70
4	GO:0044236	multicellular organism metabolic process	Biological Process	1	P07477
4	GO:0090068	positive regulation of cell cycle process	Biological Process	2	A8K4B4, B2R4U3
4	GO:0051172	negative regulation of nitrogen compound metabolic process	Biological Process	7	A0A1B0GVI7, Q8N4P8, A0A024RDF4, Q53RD8, P48506, B2RA70, P16402
4	GO:0030030	cell projection organization	Biological Process	2	Q9P1Y5, B2RA70
4	GO:1903530	regulation of secretion by cell	Biological Process	1	B2RA70
4	GO:0031665	negative regulation of lipopolysaccharide-mediated signaling pathway	Biological Process	1	B4E1V0
4	GO:0055086	nucleobase-containing small molecule metabolic process	Biological Process	6	O60701, P09669, B3KMT5, P31350, A0A140VJE0, B7Z2S5
4	GO:0043254	regulation of protein complex assembly	Biological Process	1	B2RA70
4	GO:0002695	negative regulation of leukocyte activation	Biological Process	1	Q53RD8
4	GO:0051353	positive regulation of oxidoreductase activity	Biological Process	1	G3V1D1
4	GO:0006450	regulation of translational fidelity	Biological Process	1	M0R0F0
4	GO:1901575	organic substance catabolic process	Biological Process	24	Q9Y3U8, G5E9A6, Q96RG4, C9K025, Q71UM5, O75487, P62081, Q53EY9, P50914, B2R4U3, A0A087WXM6, P39023, B4DQK1, Q7Z6E9, S4R456, A8MW49, P60604, M0R0F0, Q16678, B3KMT5, B4DE48, P62861, P63173, D3YTB1
4	GO:0051902	negative regulation of mitochondrial depolarization	Biological Process	1	B2RA70
4	GO:0050817	coagulation	Biological Process	4	Q8IZZ8, B2RA70, Q96HP0, P01023
4	GO:0080135	regulation of cellular response to stress	Biological Process	3	P60604, B7Z8R6, Q9Y6H1
4	GO:1900190	regulation of single-species biofilm formation	Biological Process	1	B4E1V0
4	GO:0009266	response to temperature stimulus	Biological Process	2	B4DUP5, P48506
4	GO:0008207	C21-steroid hormone metabolic process	Biological Process	1	Q15125
4	GO:0016477	cell migration	Biological Process	4	Q8N4P8, Q5T123, P07477, B2RA70
4	GO:0061024	membrane organization	Biological Process	15	Q9Y3U8, S4R456, C9K025, M0R0F0, Q71UM5, P62081, B0AZV9, P62861, P63173, P50914, A0A087WXM6, P39023, D3YTB1, B4DQK1, B3KRB7
4	GO:0008406	gonad development	Biological Process	1	B4DUP5
4	GO:0070271	protein complex biogenesis	Biological Process	4	B2R4U3, B0AZV9, B2RA70, P16402
4	GO:0010632	regulation of epithelial cell migration	Biological Process	2	Q5T123, B2RA70
4	GO:1900191	negative regulation of single-species biofilm formation	Biological Process	1	B4E1V0
4	GO:0030307	positive regulation of cell growth	Biological Process	2	P07477, P16402
4	GO:0002697	regulation of immune effector process	Biological Process	2	A8MW49, P01023
4	GO:0044249	cellular biosynthetic process	Biological Process	51	Q9Y3U8, C9K025, Q71UM5, Q9BW34, Q6DKI1, P62081, Q53RD8, Q8TDD1, B4DTK6, A0A1B0GVI7, A0A087WXM6, P39023, A0A140VJE0, I3L1D4, B3KRB7, S4R456, Q16678, A0A024RDF4, B4DE67, Q5T440, Q9Y6H1, P63173, Q15397, O00767, Q96RG4, B4E1V0, Q9BVP2, P31350, O60701, P50914, B4DQK1, P48506, Q99988, F1JVV5, Q6FHK1, Q7Z6E9, P60604, B3KM35, Q8N4P8, M0R0F0, B3KMT5, Q4G148, Q5T7U1, B3KS36, P16402, K7ER90, Q6IAM0, P62861,…
4	GO:0071496	cellular response to external stimulus	Biological Process	2	B4DQK1, F6KPG5
4	GO:2000394	positive regulation of lamellipodium morphogenesis	Biological Process	1	B2RA70
4	GO:0051270	regulation of cellular component movement	Biological Process	3	Q8N4P8, Q5T123, B2RA70
4	GO:0010507	negative regulation of autophagy	Biological Process	1	B4DQK1
4	GO:0009636	response to toxic substance	Biological Process	1	A0A1B0GVI7
4	GO:0034637	cellular carbohydrate biosynthetic process	Biological Process	1	Q96RG4
4	GO:0010648	negative regulation of cell communication	Biological Process	3	B4E1V0, B7Z8R6, B2RA70
4	GO:0032101	regulation of response to external stimulus	Biological Process	5	A8MW49, B4E1V0, Q8IZZ8, B2RA70, P01023
4	GO:0045786	negative regulation of cell cycle	Biological Process	1	Q71UM5
4	GO:0048871	multicellular organismal homeostasis	Biological Process	3	B4E1V0, H7C5E8, F6KPG5
4	GO:0048731	system development	Biological Process	21	B4E1V0, Q16678, Q9P1Y5, B7Z8R6, A0A024RDF4, D6RBJ7, O75487, B4DMX4, Q53RD8, P11388, Q96HP0, B4DUP5, A0A1B0GVI7, I3L2L5, B1ALI9, I3L1D4, Q15125, B2RA70, Q92876, F1JVV5, Q99988
4	GO:0010506	regulation of autophagy	Biological Process	1	B4DQK1
4	GO:0030029	actin filament-based process	Biological Process	3	Q5T123, B3KRB7, B2RA70
4	GO:0050792	regulation of viral process	Biological Process	4	A8MW49, B4E1V0, H7C5E8, P11388
4	GO:0007154	cell communication	Biological Process	26	A0A087WVA8, Q96RG4, B4E1V0, Q71UM5, Q9BW34, Q96HP0, Q8TDD1, A0A1B0GVI7, B2R4U3, H7C5E8, B4DQK1, Q9ULW0, B3KRB7, Q15125, Q99988, Q92876, F1JVV5, O15173, B7Z8R6, Q5T123, B4DE48, F6KPG5, A8YQF4, P63218, B2RA70, P01023
4	GO:0031664	regulation of lipopolysaccharide-mediated signaling pathway	Biological Process	1	B4E1V0
4	GO:0098813	nuclear chromosome segregation	Biological Process	4	A8K4B4, Q71UM5, A8K7A2, P11388
4	GO:0006575	cellular modified amino acid metabolic process	Biological Process	1	P48506
4	GO:0060548	negative regulation of cell death	Biological Process	5	A8MW49, F6KPG5, B3KRB7, P48506, B2RA70
4	GO:0001568	blood vessel development	Biological Process	2	A0A1B0GVI7, Q16678
4	GO:0009410	response to xenobiotic stimulus	Biological Process	2	A0A1B0GVI7, Q16678
4	GO:0016032	viral process	Biological Process	20	Q9Y3U8, S4R456, A8MW49, C9K025, M0R0F0, B4E1V0, Q71UM5, P62081, P11388, P62861, K7ER90, Q6IAM0, P63173, P50914, A0A087WXM6, P39023, H7C5E8, D3YTB1, B4DQK1, B3KRB7
4	GO:0007565	female pregnancy	Biological Process	1	Q13895
4	GO:0051653	spindle localization	Biological Process	1	A8K4B4
4	GO:0034123	positive regulation of toll-like receptor signaling pathway	Biological Process	1	B4E1V0
4	GO:0003254	regulation of membrane depolarization	Biological Process	1	B2RA70
4	GO:0045087	innate immune response	Biological Process	6	P62861, B4E1V0, A8YQF4, B3KRB7, B2RA70, P01023
4	GO:0002347	response to tumor cell	Biological Process	1	B1ALI9
4	GO:0044248	cellular catabolic process	Biological Process	20	Q9Y3U8, S4R456, A8MW49, P60604, G5E9A6, Q96RG4, C9K025, M0R0F0, Q71UM5, Q16678, P62081, Q53EY9, P62861, P63173, P50914, B2R4U3, A0A087WXM6, P39023, D3YTB1, Q7Z6E9
4	GO:0010941	regulation of cell death	Biological Process	12	A8MW49, Q71UM5, Q9BW34, B4DQK1, F6KPG5, B3KRB7, Q53RD8, P48506, B2RA70, Q99988, P11388, F6TR53
4	GO:0002831	regulation of response to biotic stimulus	Biological Process	2	A8MW49, B4E1V0
4	GO:0009235	cobalamin metabolic process	Biological Process	1	P07477
4	GO:0007051	spindle organization	Biological Process	1	Q9ULW0
4	GO:0019637	organophosphate metabolic process	Biological Process	5	O60701, P09669, B3KMT5, P31350, A0A140VJE0
4	GO:0001666	response to hypoxia	Biological Process	2	A8MW49, Q9Y6H1
4	GO:0031647	regulation of protein stability	Biological Process	3	Q8N4P8, H7C5E8, P16402
4	GO:0009617	response to bacterium	Biological Process	2	P62861, B4E1V0
4	GO:0046483	heterocycle metabolic process	Biological Process	54	Q9Y3U8, O95478, C9K025, Q9BW34, Q71UM5, Q6DKI1, Q9BWT3, P62081, Q53RD8, Q8TDD1, B4DTK6, B2R823, A0A1B0GVI7, A0A0A0MRW6, A0A087WXM6, P39023, A0A140VJE0, I3L1D4, B3KRB7, P07477, S4R456, Q12872, A0A024RDF4, Q9Y6H1, Q9NY93, P63173, P09669, Q13895, Q8NEF9, B4E1V0, Q9BVP2, P31350, P11388, Q9H9Y2, O60701, P50914, B2R4U3, P48506, F1JVV5, Q99988, B7Z2S5, Q7Z6E9, Q8N4P8, M0R0F0, B3KMT5, Q5T7U1, Q8IY37, Q5J…
4	GO:0043271	negative regulation of ion transport	Biological Process	1	Q96RG4
4	GO:0031323	regulation of cellular metabolic process	Biological Process	40	Q96RG4, B4E1V0, Q71UM5, Q9BW34, Q9BVP2, P31350, Q53RD8, P11388, Q8TDD1, A0A1B0GVI7, B2R4U3, H7C5E8, B4DQK1, Q9ULW0, I3L1D4, B3KRB7, P48506, Q99988, F1JVV5, Q7Z6E9, A8MW49, Q12872, P60604, Q8N4P8, M0R0F0, B3KMT5, Q9P1Y5, Q16678, Q13823, Q8IZZ8, A0A024RDF4, B7Z8R6, Q9Y6H1, P16402, K7ER90, Q6IAM0, B4DUP5, B2RA70, Q15397, P01023
4	GO:0045807	positive regulation of endocytosis	Biological Process	1	H7C5E8
4	GO:0008104	protein localization	Biological Process	19	Q9Y3U8, S4R456, P60604, C9K025, M0R0F0, Q9BVP2, Q71UM5, P62081, B4DE48, P16402, P62861, P63173, P50914, A0A087WXM6, P39023, H7C5E8, D3YTB1, B3KRB7, B2RA70
4	GO:2000147	positive regulation of cell motility	Biological Process	1	B2RA70
4	GO:0010605	negative regulation of macromolecule metabolic process	Biological Process	16	A8MW49, P60604, Q8N4P8, A0A024RDF4, B7Z8R6, Q53RD8, P16402, Q8TDD1, A0A1B0GVI7, B2R4U3, B3KRB7, I3L1D4, P48506, B2RA70, F1JVV5, P01023
4	GO:0007059	chromosome segregation	Biological Process	4	A8K4B4, Q71UM5, A8K7A2, P11388
4	GO:2000146	negative regulation of cell motility	Biological Process	1	Q8N4P8
4	GO:0044712	single-organism catabolic process	Biological Process	7	A8MW49, P60604, Q96RG4, Q16678, B3KMT5, B4DE48, P07477
4	GO:0048513	animal organ development	Biological Process	13	B4E1V0, Q16678, A0A024RDF4, D6RBJ7, O75487, B4DMX4, Q53RD8, B4DUP5, A0A1B0GVI7, I3L2L5, B1ALI9, B2RA70, Q99988
4	GO:0010817	regulation of hormone levels	Biological Process	2	Q16678, Q15125
4	GO:0022900	electron transport chain	Biological Process	1	P09669
4	GO:0023014	signal transduction by protein phosphorylation	Biological Process	4	Q96RG4, B7Z8R6, B3KRB7, Q99988
5	GO:0045824	negative regulation of innate immune response	Biological Process	1	P01023
5	GO:0002920	regulation of humoral immune response	Biological Process	1	P01023
5	GO:0071310	cellular response to organic substance	Biological Process	14	Q13895, P60604, Q96RG4, B4E1V0, Q16678, A0A024RDF4, Q8TDD1, A8YQF4, A0A1B0GVI7, P63218, B3KRB7, B2RA70, Q99988, F1JVV5
5	GO:1901293	nucleoside phosphate biosynthetic process	Biological Process	1	A0A140VJE0
5	GO:0006753	nucleoside phosphate metabolic process	Biological Process	5	O60701, P09669, B3KMT5, P31350, A0A140VJE0
5	GO:0007166	cell surface receptor signaling pathway	Biological Process	5	A8YQF4, B4E1V0, B3KRB7, B2RA70, Q99988
5	GO:0001944	vasculature development	Biological Process	2	A0A1B0GVI7, Q16678
5	GO:0051900	regulation of mitochondrial depolarization	Biological Process	1	B2RA70
5	GO:0009059	macromolecule biosynthetic process	Biological Process	47	Q9Y3U8, Q96RG4, C9K025, B4E1V0, Q71UM5, Q9BW34, Q9BVP2, Q6DKI1, O75487, P31350, P62081, Q53RD8, Q8TDD1, B4DTK6, O60701, A0A1B0GVI7, P50914, A0A087WXM6, P39023, B4DQK1, I3L1D4, B3KRB7, P48506, Q99988, F1JVV5, Q6FHK1, Q7Z6E9, S4R456, P60604, B3KM35, Q8N4P8, M0R0F0, B3KMT5, Q4G148, A0A024RDF4, Q5T7U1, Q9Y6H1, B3KS36, P16402, K7ER90, Q6IAM0, P62861, B4DUP5, P63173, D3YTB1, B2RA70, Q15397
5	GO:2001233	regulation of apoptotic signaling pathway	Biological Process	1	B2RA70
5	GO:0016125	sterol metabolic process	Biological Process	4	Q16678, B3KRC6, B4DE48, Q15125
5	GO:0009116	nucleoside metabolic process	Biological Process	3	P09669, B3KMT5, A0A140VJE0
5	GO:0033043	regulation of organelle organization	Biological Process	7	A8K4B4, Q9BVP2, Q9P1Y5, B2R4U3, Q5T123, B4DQK1, B2RA70
5	GO:0061298	retina vasculature development in camera-type eye	Biological Process	1	Q16678
5	GO:0046486	glycerolipid metabolic process	Biological Process	1	A8MW49
5	GO:0030198	extracellular matrix organization	Biological Process	2	P07477, P01023
5	GO:0090304	nucleic acid metabolic process	Biological Process	48	Q9Y3U8, O95478, C9K025, Q9BW34, Q71UM5, Q6DKI1, Q9BWT3, P62081, Q53RD8, Q8TDD1, B4DTK6, B2R823, A0A1B0GVI7, A0A0A0MRW6, A0A087WXM6, P39023, B3KRB7, I3L1D4, S4R456, Q12872, A0A024RDF4, Q9Y6H1, Q9NY93, P63173, Q13895, Q8NEF9, B4E1V0, Q9BVP2, P31350, P11388, Q9H9Y2, P50914, B2R4U3, P48506, F1JVV5, Q7Z6E9, Q8N4P8, M0R0F0, B3KMT5, Q5T7U1, Q8IY37, Q5JXX1, B3KS36, P16402, Q9BVJ6, P62861, D3YTB1, B2RA70
5	GO:0022618	ribonucleoprotein complex assembly	Biological Process	3	Q12872, P63173, H3BMQ2
5	GO:0010212	response to ionizing radiation	Biological Process	1	Q9BW34
5	GO:0030433	ER-associated ubiquitin-dependent protein catabolic process	Biological Process	1	P60604
5	GO:1900228	regulation of single-species biofilm formation in or on host organism	Biological Process	1	B4E1V0
5	GO:0006508	proteolysis	Biological Process	12	A8MW49, P60604, G5E9A6, Q71UM5, Q8IZZ8, Q53EY9, B2R4U3, P07477, B2RA70, Q92876, Q7Z6E9, P01023
5	GO:0071478	cellular response to radiation	Biological Process	1	Q9BW34
5	GO:0002764	immune response-regulating signaling pathway	Biological Process	3	B4E1V0, B3KRB7, B2RA70
5	GO:0051650	establishment of vesicle localization	Biological Process	1	B0AZV9
5	GO:0031326	regulation of cellular biosynthetic process	Biological Process	26	Q96RG4, B4E1V0, Q71UM5, Q9BVP2, Q9BW34, P31350, Q53RD8, Q8TDD1, A0A1B0GVI7, B3KRB7, I3L1D4, P48506, Q99988, F1JVV5, Q7Z6E9, Q8N4P8, M0R0F0, B3KMT5, A0A024RDF4, Q9Y6H1, P16402, K7ER90, Q6IAM0, B4DUP5, B2RA70, Q15397
5	GO:0007159	leukocyte cell-cell adhesion	Biological Process	3	Q53RD8, B2RA70, Q96HP0
5	GO:0002227	innate immune response in mucosa	Biological Process	2	P62861, B4E1V0
5	GO:0000902	cell morphogenesis	Biological Process	1	B2RA70
5	GO:0006022	aminoglycan metabolic process	Biological Process	5	O60701, B3KM35, Q4G148, O75487, Q5T985
5	GO:0051188	cofactor biosynthetic process	Biological Process	2	O00767, Q5T440
5	GO:0070925	organelle assembly	Biological Process	2	Q9ULW0, B2RA70
5	GO:0007399	nervous system development	Biological Process	8	B4DUP5, Q9P1Y5, B7Z8R6, I3L1D4, B2RA70, F1JVV5, Q92876, Q96HP0
5	GO:0007080	mitotic metaphase plate congression	Biological Process	1	A8K7A2
5	GO:1902531	regulation of intracellular signal transduction	Biological Process	9	Q96RG4, B4E1V0, Q9BW34, B7Z8R6, Q9ULW0, B3KRB7, B2RA70, Q99988, P01023
5	GO:0070201	regulation of establishment of protein localization	Biological Process	2	P60604, B2RA70
5	GO:1902532	negative regulation of intracellular signal transduction	Biological Process	2	B7Z8R6, B2RA70
5	GO:0072359	circulatory system development	Biological Process	2	A0A1B0GVI7, Q16678
5	GO:0051338	regulation of transferase activity	Biological Process	5	Q8N4P8, B4E1V0, B2R4U3, Q9ULW0, B2RA70
5	GO:0045934	negative regulation of nucleobase-containing compound metabolic process	Biological Process	6	A0A1B0GVI7, Q8N4P8, Q53RD8, P48506, B2RA70, P16402
5	GO:0000083	regulation of transcription involved in G1/S transition of mitotic cell cycle	Biological Process	1	P31350
5	GO:0051174	regulation of phosphorus metabolic process	Biological Process	9	Q8N4P8, B4E1V0, Q9P1Y5, B3KMT5, B7Z8R6, Q9ULW0, B3KRB7, Q99988, B2RA70
5	GO:1901989	positive regulation of cell cycle phase transition	Biological Process	1	B2R4U3
5	GO:2000398	regulation of thymocyte aggregation	Biological Process	1	Q53RD8
5	GO:1904357	negative regulation of telomere maintenance via telomere lengthening	Biological Process	1	B2RA70
5	GO:0000165	MAPK cascade	Biological Process	4	Q96RG4, B7Z8R6, B3KRB7, Q99988
5	GO:0030335	positive regulation of cell migration	Biological Process	1	B2RA70
5	GO:0006637	acyl-CoA metabolic process	Biological Process	1	O00767
5	GO:0019693	ribose phosphate metabolic process	Biological Process	2	P09669, B3KMT5
5	GO:0006974	cellular response to DNA damage stimulus	Biological Process	5	Q71UM5, B2R4U3, Q5JXX1, P11388, Q7Z6E9
5	GO:0010748	negative regulation of plasma membrane long-chain fatty acid transport	Biological Process	1	Q96RG4
5	GO:0010562	positive regulation of phosphorus metabolic process	Biological Process	4	B4E1V0, Q9ULW0, Q99988, B2RA70
5	GO:0044839	cell cycle G2/M phase transition	Biological Process	1	Q9ULW0
5	GO:2000641	regulation of early endosome to late endosome transport	Biological Process	1	B2RA70
5	GO:0050708	regulation of protein secretion	Biological Process	1	B2RA70
5	GO:0051899	membrane depolarization	Biological Process	1	B2RA70
5	GO:1905269	positive regulation of chromatin organization	Biological Process	1	P16402
5	GO:0055082	cellular chemical homeostasis	Biological Process	4	B4E1V0, B7Z8Q4, H7C5E8, G3V1D1
5	GO:0071228	cellular response to tumor cell	Biological Process	1	B1ALI9
5	GO:0005977	glycogen metabolic process	Biological Process	1	Q96RG4
5	GO:0050994	regulation of lipid catabolic process	Biological Process	1	Q96RG4
5	GO:0060349	bone morphogenesis	Biological Process	1	B4E1V0
5	GO:0048260	positive regulation of receptor-mediated endocytosis	Biological Process	1	H7C5E8
5	GO:0019054	modulation by virus of host process	Biological Process	1	B4DQK1
5	GO:0006811	ion transport	Biological Process	7	Q6N075, P09669, Q96RG4, B4E1V0, H7C5E8, G3V1D1, F6KPG5
5	GO:0050832	defense response to fungus	Biological Process	1	B4E1V0
5	GO:0000087	mitotic M phase	Biological Process	3	Q71UM5, B2R4U3, A8K7A2
5	GO:0006446	regulation of translational initiation	Biological Process	4	K7ER90, Q6IAM0, B4DUP5, Q71UM5
5	GO:0071466	cellular response to xenobiotic stimulus	Biological Process	2	A0A1B0GVI7, Q16678
5	GO:0090150	establishment of protein localization to membrane	Biological Process	13	Q9Y3U8, S4R456, C9K025, M0R0F0, Q71UM5, P62081, P62861, P63173, P50914, A0A087WXM6, P39023, D3YTB1, B3KRB7
5	GO:0042273	ribosomal large subunit biogenesis	Biological Process	4	C9K025, P50914, Q6DKI1, Q9H9Y2
5	GO:0043255	regulation of carbohydrate biosynthetic process	Biological Process	1	Q96RG4
5	GO:0051250	negative regulation of lymphocyte activation	Biological Process	1	Q53RD8
5	GO:0008544	epidermis development	Biological Process	1	B1ALI9
5	GO:0048872	homeostasis of number of cells	Biological Process	1	Q53RD8
5	GO:0043436	oxoacid metabolic process	Biological Process	9	O00767, Q96RG4, Q16678, B3KMT5, B4DE67, B3KRC6, P48506, A0A024R172, Q5HYD9
5	GO:0043244	regulation of protein complex disassembly	Biological Process	1	Q5T123
5	GO:0051223	regulation of protein transport	Biological Process	2	P60604, B2RA70
5	GO:1904293	negative regulation of ERAD pathway	Biological Process	1	P60604
5	GO:1904292	regulation of ERAD pathway	Biological Process	1	P60604
5	GO:0010468	regulation of gene expression	Biological Process	25	B4E1V0, Q71UM5, Q9BVP2, Q9BW34, P31350, Q53RD8, A0A1B0GVI7, H7C5E8, I3L1D4, B3KRB7, P48506, F1JVV5, Q99988, Q12872, M0R0F0, B3KMT5, Q16678, A0A024RDF4, Q9Y6H1, P16402, K7ER90, Q6IAM0, B4DUP5, Q15397, P01023
5	GO:0007599	hemostasis	Biological Process	4	Q8IZZ8, B2RA70, Q96HP0, P01023
5	GO:0070507	regulation of microtubule cytoskeleton organization	Biological Process	1	Q9P1Y5
5	GO:0007417	central nervous system development	Biological Process	1	B4DUP5
5	GO:0030097	hemopoiesis	Biological Process	2	Q53RD8, B2RA70
5	GO:0042157	lipoprotein metabolic process	Biological Process	2	B4DQK1, F6KPG5
5	GO:0030154	cell differentiation	Biological Process	17	O00458, S4R456, B4E1V0, Q8N4P8, Q9P1Y5, B7Z8R6, Q53RD8, Q96HP0, B4DUP5, H7C5E8, I3L2L5, B1ALI9, B3KRB7, B2RA70, Q92876, F1JVV5, Q99988
5	GO:1902275	regulation of chromatin organization	Biological Process	1	P16402
5	GO:0006909	phagocytosis	Biological Process	1	B2RA70
5	GO:0060049	regulation of protein glycosylation	Biological Process	1	Q15397
5	GO:0032496	response to lipopolysaccharide	Biological Process	1	B4E1V0
5	GO:0060284	regulation of cell development	Biological Process	3	B4E1V0, B3KRB7, B2RA70
5	GO:0032368	regulation of lipid transport	Biological Process	1	Q96RG4
5	GO:0008610	lipid biosynthetic process	Biological Process	4	O00767, B4DE67, B3KRC6, Q15125
5	GO:0019058	viral life cycle	Biological Process	16	Q9Y3U8, S4R456, C9K025, M0R0F0, B4E1V0, Q71UM5, P62081, P11388, P62861, K7ER90, Q6IAM0, P63173, P50914, A0A087WXM6, P39023, D3YTB1
5	GO:0039692	single stranded viral RNA replication via double stranded DNA intermediate	Biological Process	1	P11388
5	GO:0010565	regulation of cellular ketone metabolic process	Biological Process	1	Q96RG4
5	GO:0006954	inflammatory response	Biological Process	2	B3KRB7, P01023
5	GO:0010720	positive regulation of cell development	Biological Process	1	B2RA70
5	GO:0033690	positive regulation of osteoblast proliferation	Biological Process	1	B4E1V0
5	GO:0071453	cellular response to oxygen levels	Biological Process	3	A8MW49, B4DQK1, Q9Y6H1
5	GO:0019439	aromatic compound catabolic process	Biological Process	12	Q9Y3U8, S4R456, C9K025, M0R0F0, Q71UM5, P62081, P62861, P63173, P50914, A0A087WXM6, P39023, D3YTB1
5	GO:0006479	protein methylation	Biological Process	1	P16402
5	GO:0045916	negative regulation of complement activation	Biological Process	1	P01023
5	GO:1903008	organelle disassembly	Biological Process	2	A8MW49, B4DQK1
5	GO:0051054	positive regulation of DNA metabolic process	Biological Process	2	Q9BVP2, P11388
5	GO:0044179	hemolysis in other organism	Biological Process	1	F6KPG5
5	GO:0000090	mitotic anaphase	Biological Process	3	Q71UM5, B2R4U3, A8K7A2
5	GO:0033993	response to lipid	Biological Process	4	Q8TDD1, B4E1V0, A0A1B0GVI7, B2RA70
5	GO:0033692	cellular polysaccharide biosynthetic process	Biological Process	1	Q96RG4
5	GO:0051604	protein maturation	Biological Process	3	P07477, Q92876, P01023
5	GO:0008366	axon ensheathment	Biological Process	1	B4DUP5
5	GO:0016042	lipid catabolic process	Biological Process	4	A8MW49, Q96RG4, Q16678, B4DE48
5	GO:0035150	regulation of tube size	Biological Process	1	P48506
5	GO:0044259	multicellular organismal macromolecule metabolic process	Biological Process	1	P07477
5	GO:0016192	vesicle-mediated transport	Biological Process	8	B7Z8Q4, H7C5E8, B7Z8R6, B0AZV9, B4DE48, F6KPG5, B2RA70, P01023
5	GO:1901136	carbohydrate derivative catabolic process	Biological Process	1	O75487
5	GO:0010992	ubiquitin homeostasis	Biological Process	1	B2R4U3
5	GO:0044243	multicellular organism catabolic process	Biological Process	1	P07477
5	GO:0001667	ameboidal-type cell migration	Biological Process	3	Q5T123, P07477, B2RA70
5	GO:0055085	transmembrane transport	Biological Process	1	Q96RG4
5	GO:0010594	regulation of endothelial cell migration	Biological Process	1	Q5T123
5	GO:0030036	actin cytoskeleton organization	Biological Process	3	Q5T123, B3KRB7, B2RA70
5	GO:1901362	organic cyclic compound biosynthetic process	Biological Process	32	Q9Y3U8, C9K025, B4E1V0, Q9BW34, Q71UM5, Q9BVP2, P31350, P62081, Q53RD8, B4DTK6, O60701, A0A1B0GVI7, P50914, A0A087WXM6, P39023, A0A140VJE0, B3KRB7, Q15125, P48506, F1JVV5, S4R456, M0R0F0, B3KMT5, B4DE67, Q5T7U1, Q9Y6H1, P16402, P62861, P63173, D3YTB1, B3KRC6, B2RA70
5	GO:0030970	retrograde protein transport, ER to cytosol	Biological Process	1	P60604
5	GO:0072524	pyridine-containing compound metabolic process	Biological Process	1	B3KMT5
5	GO:0098792	xenophagy	Biological Process	1	A8MW49
5	GO:0031669	cellular response to nutrient levels	Biological Process	2	B4DQK1, F6KPG5
5	GO:0070302	regulation of stress-activated protein kinase signaling cascade	Biological Process	1	B7Z8R6
5	GO:0015893	drug transport	Biological Process	1	Q15125
5	GO:0001649	osteoblast differentiation	Biological Process	3	S4R456, B4E1V0, Q8N4P8
5	GO:0051248	negative regulation of protein metabolic process	Biological Process	8	A8MW49, P60604, Q8N4P8, B2R4U3, B7Z8R6, B3KRB7, B2RA70, P01023
5	GO:0043467	regulation of generation of precursor metabolites and energy	Biological Process	2	Q96RG4, B3KMT5
5	GO:0040001	establishment of mitotic spindle localization	Biological Process	1	A8K4B4
5	GO:0002429	immune response-activating cell surface receptor signaling pathway	Biological Process	2	B3KRB7, B2RA70
5	GO:0006720	isoprenoid metabolic process	Biological Process	2	Q16678, O75487
5	GO:0050821	protein stabilization	Biological Process	2	Q8N4P8, P16402
5	GO:0001894	tissue homeostasis	Biological Process	3	B4E1V0, H7C5E8, F6KPG5
5	GO:0051293	establishment of spindle localization	Biological Process	1	A8K4B4
5	GO:0030163	protein catabolic process	Biological Process	6	P60604, G5E9A6, B2R4U3, B4DQK1, Q53EY9, Q7Z6E9
5	GO:0006259	DNA metabolic process	Biological Process	8	Q8N4P8, Q9BVP2, Q71UM5, B2R4U3, Q5JXX1, P11388, B2RA70, Q7Z6E9
5	GO:0033013	tetrapyrrole metabolic process	Biological Process	1	P07477
5	GO:0071801	regulation of podosome assembly	Biological Process	1	B2RA70
5	GO:0010563	negative regulation of phosphorus metabolic process	Biological Process	3	Q9P1Y5, B7Z8R6, B3KRB7
5	GO:0072358	cardiovascular system development	Biological Process	2	A0A1B0GVI7, Q16678
5	GO:0006880	intracellular sequestering of iron ion	Biological Process	1	G3V1D1
5	GO:0007093	mitotic cell cycle checkpoint	Biological Process	1	Q71UM5
5	GO:0046700	heterocycle catabolic process	Biological Process	12	Q9Y3U8, S4R456, C9K025, M0R0F0, Q71UM5, P62081, P62861, P63173, P50914, A0A087WXM6, P39023, D3YTB1
5	GO:0005976	polysaccharide metabolic process	Biological Process	2	O60701, Q96RG4
5	GO:0001709	cell fate determination	Biological Process	1	O00458
5	GO:1902732	positive regulation of chondrocyte proliferation	Biological Process	1	B4E1V0
5	GO:0042113	B cell activation	Biological Process	1	A0A1B0GVI7
5	GO:0032943	mononuclear cell proliferation	Biological Process	1	A0A1B0GVI7
5	GO:0045088	regulation of innate immune response	Biological Process	4	B4E1V0, B3KRB7, B2RA70, P01023
5	GO:0051052	regulation of DNA metabolic process	Biological Process	5	Q8N4P8, Q9BVP2, B2RA70, P11388, Q7Z6E9
5	GO:0016052	carbohydrate catabolic process	Biological Process	1	B3KMT5
5	GO:0002474	antigen processing and presentation of peptide antigen via MHC class I	Biological Process	1	A8YQF4
5	GO:0051648	vesicle localization	Biological Process	1	B0AZV9
5	GO:1903555	regulation of tumor necrosis factor superfamily cytokine production	Biological Process	1	B4E1V0
5	GO:1901659	glycosyl compound biosynthetic process	Biological Process	1	A0A140VJE0
5	GO:0051249	regulation of lymphocyte activation	Biological Process	3	A0A1B0GVI7, Q53RD8, B2RA70
5	GO:0036296	response to increased oxygen levels	Biological Process	1	B4DQK1
5	GO:0043603	cellular amide metabolic process	Biological Process	22	Q9Y3U8, S4R456, C9K025, M0R0F0, Q71UM5, Q9BW34, Q6DKI1, A0A024RDF4, P62081, B3KS36, P62861, K7ER90, Q6IAM0, P63173, P50914, B4DUP5, A0A087WXM6, P39023, D3YTB1, P48506, Q6FHK1, Q15397
5	GO:0032386	regulation of intracellular transport	Biological Process	2	P60604, B2RA70
5	GO:0042176	regulation of protein catabolic process	Biological Process	3	P60604, B2R4U3, B4DQK1
5	GO:0010675	regulation of cellular carbohydrate metabolic process	Biological Process	1	Q96RG4
5	GO:0030449	regulation of complement activation	Biological Process	1	P01023
5	GO:0071822	protein complex subunit organization	Biological Process	6	B2R4U3, Q5T123, B0AZV9, B2RA70, P16402, Q6FHK1
5	GO:0044793	negative regulation by host of viral process	Biological Process	1	B4E1V0
5	GO:1903039	positive regulation of leukocyte cell-cell adhesion	Biological Process	1	B2RA70
5	GO:0001654	eye development	Biological Process	1	Q16678
5	GO:0045669	positive regulation of osteoblast differentiation	Biological Process	1	B4E1V0
5	GO:0032269	negative regulation of cellular protein metabolic process	Biological Process	7	A8MW49, Q8N4P8, B2R4U3, B7Z8R6, B3KRB7, B2RA70, P01023
5	GO:0018130	heterocycle biosynthetic process	Biological Process	29	Q9Y3U8, C9K025, B4E1V0, Q9BW34, Q71UM5, Q9BVP2, P31350, P62081, Q53RD8, B4DTK6, O60701, A0A1B0GVI7, P50914, A0A087WXM6, P39023, A0A140VJE0, B3KRB7, P48506, F1JVV5, S4R456, M0R0F0, B3KMT5, Q5T7U1, Q9Y6H1, P16402, P62861, P63173, D3YTB1, B2RA70
5	GO:0000096	sulfur amino acid metabolic process	Biological Process	1	P48506
5	GO:0033750	ribosome localization	Biological Process	1	S4R456
5	GO:0007009	plasma membrane organization	Biological Process	1	B3KRB7
5	GO:0009262	deoxyribonucleotide metabolic process	Biological Process	1	P31350
5	GO:0034654	nucleobase-containing compound biosynthetic process	Biological Process	29	Q9Y3U8, C9K025, B4E1V0, Q9BW34, Q71UM5, Q9BVP2, P31350, P62081, Q53RD8, B4DTK6, O60701, A0A1B0GVI7, P50914, A0A087WXM6, P39023, A0A140VJE0, B3KRB7, P48506, F1JVV5, S4R456, M0R0F0, B3KMT5, Q5T7U1, Q9Y6H1, P16402, P62861, P63173, D3YTB1, B2RA70
5	GO:0071456	cellular response to hypoxia	Biological Process	2	A8MW49, Q9Y6H1
5	GO:0015949	nucleobase-containing small molecule interconversion	Biological Process	2	P31350, B7Z2S5
5	GO:0042572	retinol metabolic process	Biological Process	1	Q16678
5	GO:0043086	negative regulation of catalytic activity	Biological Process	6	A8MW49, B4E1V0, Q9P1Y5, B2R4U3, B3KRB7, B2RA70
5	GO:0065003	macromolecular complex assembly	Biological Process	7	Q12872, P63173, B2R4U3, B0AZV9, H3BMQ2, B2RA70, P16402
5	GO:0031329	regulation of cellular catabolic process	Biological Process	2	Q96RG4, B2R4U3
5	GO:0030098	lymphocyte differentiation	Biological Process	1	Q53RD8
5	GO:0008277	regulation of G-protein coupled receptor protein signaling pathway	Biological Process	1	Q92876
5	GO:0051276	chromosome organization	Biological Process	7	A8K4B4, Q9BVP2, Q71UM5, A8K7A2, P11388, P16402, B2RA70
5	GO:0015850	organic hydroxy compound transport	Biological Process	1	F6KPG5
5	GO:0030334	regulation of cell migration	Biological Process	3	Q8N4P8, Q5T123, B2RA70
5	GO:0043412	macromolecule modification	Biological Process	24	Q9ULR3, G5E9A6, Q96RG4, B4E1V0, Q9BVP2, Q53EY9, P11388, B2R4U3, B4DMI9, A8K7A2, B4DQK1, Q9ULW0, B3KRB7, Q99988, Q7Z6E9, P60604, Q8N4P8, Q8TB52, Q4G148, B7Z8R6, Q5JXX1, P16402, B2RA70, Q15397
5	GO:0061458	reproductive system development	Biological Process	1	B4DUP5
5	GO:0001907	killing by symbiont of host cells	Biological Process	1	F6KPG5
5	GO:0051659	maintenance of mitochondrion location	Biological Process	1	F6KPG5
5	GO:0042359	vitamin D metabolic process	Biological Process	1	D6RBJ7
5	GO:0021782	glial cell development	Biological Process	1	B4DUP5
5	GO:0034976	response to endoplasmic reticulum stress	Biological Process	1	P60604
5	GO:0046660	female sex differentiation	Biological Process	1	B4DUP5
5	GO:0051960	regulation of nervous system development	Biological Process	1	B2RA70
5	GO:0016053	organic acid biosynthetic process	Biological Process	2	O00767, B4DE67
5	GO:0048878	chemical homeostasis	Biological Process	6	B4E1V0, Q96RG4, B7Z8Q4, H7C5E8, G3V1D1, B2RA70
5	GO:1903335	regulation of vacuolar transport	Biological Process	1	B2RA70
5	GO:0030856	regulation of epithelial cell differentiation	Biological Process	1	B3KRB7
5	GO:0019216	regulation of lipid metabolic process	Biological Process	1	Q96RG4
5	GO:0044242	cellular lipid catabolic process	Biological Process	2	A8MW49, Q96RG4
5	GO:0070663	regulation of leukocyte proliferation	Biological Process	2	A0A1B0GVI7, B2RA70
5	GO:0002921	negative regulation of humoral immune response	Biological Process	1	P01023
5	GO:0016070	RNA metabolic process	Biological Process	44	Q9Y3U8, O95478, Q13895, Q8NEF9, C9K025, B4E1V0, Q9BW34, Q71UM5, Q6DKI1, Q9BVP2, Q9BWT3, P62081, P31350, Q53RD8, P11388, Q9H9Y2, Q8TDD1, B4DTK6, B2R823, A0A1B0GVI7, P50914, A0A0A0MRW6, A0A087WXM6, P39023, B3KRB7, I3L1D4, P48506, F1JVV5, Q7Z6E9, S4R456, Q12872, M0R0F0, B3KMT5, A0A024RDF4, Q5T7U1, Q8IY37, Q9Y6H1, Q9NY93, B3KS36, P16402, Q9BVJ6, P62861, P63173, D3YTB1
5	GO:1903901	negative regulation of viral life cycle	Biological Process	1	B4E1V0
5	GO:1901889	negative regulation of cell junction assembly	Biological Process	1	B3KRB7
5	GO:0010556	regulation of macromolecule biosynthetic process	Biological Process	26	Q96RG4, B4E1V0, Q71UM5, Q9BVP2, Q9BW34, P31350, Q53RD8, Q8TDD1, A0A1B0GVI7, B3KRB7, I3L1D4, P48506, Q99988, F1JVV5, Q7Z6E9, Q8N4P8, M0R0F0, B3KMT5, A0A024RDF4, Q9Y6H1, P16402, K7ER90, Q6IAM0, B4DUP5, B2RA70, Q15397
5	GO:0008585	female gonad development	Biological Process	1	B4DUP5
5	GO:0010994	free ubiquitin chain polymerization	Biological Process	1	B2R4U3
5	GO:0072594	establishment of protein localization to organelle	Biological Process	13	Q9Y3U8, S4R456, C9K025, M0R0F0, Q71UM5, P62081, P16402, P62861, P63173, P50914, A0A087WXM6, P39023, D3YTB1
5	GO:0032459	regulation of protein oligomerization	Biological Process	1	B2RA70
5	GO:0051303	establishment of chromosome localization	Biological Process	1	A8K7A2
5	GO:0071706	tumor necrosis factor superfamily cytokine production	Biological Process	1	B4E1V0
5	GO:0010629	negative regulation of gene expression	Biological Process	6	A0A024RDF4, Q53RD8, P48506, P16402, F1JVV5, P01023
5	GO:0006518	peptide metabolic process	Biological Process	22	Q9Y3U8, S4R456, C9K025, M0R0F0, Q71UM5, Q9BW34, Q6DKI1, A0A024RDF4, P62081, B3KS36, P62861, K7ER90, Q6IAM0, P63173, P50914, B4DUP5, A0A087WXM6, P39023, D3YTB1, P48506, Q6FHK1, Q15397
5	GO:0031333	negative regulation of protein complex assembly	Biological Process	1	B2RA70
5	GO:1903034	regulation of response to wounding	Biological Process	1	Q8IZZ8
5	GO:0006066	alcohol metabolic process	Biological Process	4	Q16678, B3KRC6, B4DE48, Q15125
5	GO:1903018	regulation of glycoprotein metabolic process	Biological Process	1	Q15397
5	GO:0009311	oligosaccharide metabolic process	Biological Process	1	O60701
5	GO:0003018	vascular process in circulatory system	Biological Process	2	P48506, B2RA70
5	GO:1901699	cellular response to nitrogen compound	Biological Process	3	Q96RG4, P63218, B2RA70
5	GO:0009100	glycoprotein metabolic process	Biological Process	4	P60604, B3KM35, Q4G148, Q15397
5	GO:0036293	response to decreased oxygen levels	Biological Process	2	A8MW49, Q9Y6H1
5	GO:0045840	positive regulation of mitotic nuclear division	Biological Process	2	A8K4B4, B2R4U3
5	GO:0007034	vacuolar transport	Biological Process	2	B4DE48, B2RA70
5	GO:0002758	innate immune response-activating signal transduction	Biological Process	3	B4E1V0, B3KRB7, B2RA70
5	GO:0045930	negative regulation of mitotic cell cycle	Biological Process	1	Q71UM5
5	GO:1903827	regulation of cellular protein localization	Biological Process	2	P60604, Q9BVP2
5	GO:0042274	ribosomal small subunit biogenesis	Biological Process	2	S4R456, P62081
5	GO:0000302	response to reactive oxygen species	Biological Process	2	A8MW49, B7Z2S5
5	GO:0051193	regulation of cofactor metabolic process	Biological Process	1	B3KMT5
5	GO:0045732	positive regulation of protein catabolic process	Biological Process	2	B2R4U3, B4DQK1
5	GO:0042254	ribosome biogenesis	Biological Process	25	Q9Y3U8, O95478, Q13895, C9K025, Q6DKI1, Q71UM5, P62081, Q9H9Y2, B2R823, P50914, A0A0A0MRW6, A0A087WXM6, P39023, Q6FHK1, S4R456, M0R0F0, Q8IY37, Q8TDN6, B3KS36, Q9NY93, Q9BVJ6, P62861, P63173, D3YTB1, H3BMQ2
5	GO:0070862	negative regulation of protein exit from endoplasmic reticulum	Biological Process	1	P60604
5	GO:0046326	positive regulation of glucose import	Biological Process	1	Q96RG4
5	GO:0006921	cellular component disassembly involved in execution phase of apoptosis	Biological Process	1	P11388
5	GO:0048145	regulation of fibroblast proliferation	Biological Process	1	G3V1D1
5	GO:0039521	suppression by virus of host autophagy	Biological Process	1	B4DQK1
5	GO:0048545	response to steroid hormone	Biological Process	2	Q8TDD1, B2RA70
5	GO:0043085	positive regulation of catalytic activity	Biological Process	7	B4E1V0, Q71UM5, B2R4U3, Q5T123, G3V1D1, Q9ULW0, B2RA70
5	GO:0032268	regulation of cellular protein metabolic process	Biological Process	22	A8MW49, B4E1V0, M0R0F0, Q8N4P8, Q71UM5, Q9BW34, Q9BVP2, Q8IZZ8, A0A024RDF4, B7Z8R6, P16402, K7ER90, Q6IAM0, B4DUP5, B2R4U3, B4DQK1, Q9ULW0, B3KRB7, Q99988, B2RA70, Q15397, P01023
5	GO:0051169	nuclear transport	Biological Process	1	S4R456
5	GO:2000192	negative regulation of fatty acid transport	Biological Process	1	Q96RG4
5	GO:0019731	antibacterial humoral response	Biological Process	2	P62861, B4E1V0
5	GO:0044270	cellular nitrogen compound catabolic process	Biological Process	12	Q9Y3U8, S4R456, C9K025, M0R0F0, Q71UM5, P62081, P62861, P63173, P50914, A0A087WXM6, P39023, D3YTB1
5	GO:0007186	G-protein coupled receptor signaling pathway	Biological Process	2	P63218, Q92876
5	GO:0002237	response to molecule of bacterial origin	Biological Process	1	B4E1V0
5	GO:1904231	positive regulation of succinate dehydrogenase activity	Biological Process	1	G3V1D1
5	GO:0048705	skeletal system morphogenesis	Biological Process	1	B4E1V0
5	GO:0010827	regulation of glucose transport	Biological Process	1	Q96RG4
5	GO:0034655	nucleobase-containing compound catabolic process	Biological Process	12	Q9Y3U8, S4R456, C9K025, M0R0F0, Q71UM5, P62081, P62861, P63173, P50914, A0A087WXM6, P39023, D3YTB1
5	GO:0006112	energy reserve metabolic process	Biological Process	1	Q96RG4
5	GO:0014070	response to organic cyclic compound	Biological Process	4	Q8TDD1, A0A1B0GVI7, Q16678, B2RA70
5	GO:0034121	regulation of toll-like receptor signaling pathway	Biological Process	1	B4E1V0
5	GO:0052331	hemolysis in other organism involved in symbiotic interaction	Biological Process	1	F6KPG5
5	GO:0045165	cell fate commitment	Biological Process	1	O00458
5	GO:0010557	positive regulation of macromolecule biosynthetic process	Biological Process	10	Q96RG4, A0A1B0GVI7, Q9BVP2, B3KMT5, Q71UM5, A0A024RDF4, Q9Y6H1, B3KRB7, Q53RD8, F1JVV5
5	GO:1902105	regulation of leukocyte differentiation	Biological Process	1	Q53RD8
5	GO:0010638	positive regulation of organelle organization	Biological Process	4	A8K4B4, Q9BVP2, B2R4U3, B2RA70
5	GO:0098780	response to mitochondrial depolarisation	Biological Process	1	A8MW49
5	GO:0022604	regulation of cell morphogenesis	Biological Process	1	B2RA70
5	GO:0019079	viral genome replication	Biological Process	2	B4E1V0, P11388
5	GO:0034250	positive regulation of cellular amide metabolic process	Biological Process	2	Q71UM5, A0A024RDF4
5	GO:0051017	actin filament bundle assembly	Biological Process	1	B2RA70
5	GO:0010038	response to metal ion	Biological Process	1	H7C5E8
5	GO:0019081	viral translation	Biological Process	2	K7ER90, Q6IAM0
5	GO:0006818	hydrogen transport	Biological Process	1	P09669
5	GO:0010467	gene expression	Biological Process	54	Q9Y3U8, O95478, C9K025, Q71UM5, Q9BW34, Q6DKI1, Q9BWT3, P62081, Q53RD8, Q8TDD1, B4DTK6, B2R823, A0A0A0MRW6, A0A1B0GVI7, A0A087WXM6, P39023, P07477, B3KRB7, I3L1D4, S4R456, Q12872, Q16678, A0A024RDF4, Q9Y6H1, Q9NY93, P63173, Q15397, P01023, Q13895, Q8NEF9, B4E1V0, Q9BVP2, P31350, Q9H9Y2, P50914, H7C5E8, P48506, F1JVV5, Q92876, Q99988, Q7Z6E9, Q6FHK1, M0R0F0, B3KMT5, Q5T7U1, Q8IY37, B3KS36, P16402,…
5	GO:0000819	sister chromatid segregation	Biological Process	3	A8K4B4, Q71UM5, A8K7A2
5	GO:0051339	regulation of lyase activity	Biological Process	1	G3V1D1
5	GO:0072527	pyrimidine-containing compound metabolic process	Biological Process	1	B7Z2S5
5	GO:0009267	cellular response to starvation	Biological Process	2	B4DQK1, F6KPG5
5	GO:2000399	negative regulation of thymocyte aggregation	Biological Process	1	Q53RD8
5	GO:0009057	macromolecule catabolic process	Biological Process	19	Q9Y3U8, S4R456, P60604, G5E9A6, C9K025, M0R0F0, Q71UM5, O75487, P62081, Q53EY9, P62861, P63173, P50914, B2R4U3, A0A087WXM6, P39023, D3YTB1, B4DQK1, Q7Z6E9
5	GO:0009306	protein secretion	Biological Process	1	B2RA70
5	GO:2000810	regulation of bicellular tight junction assembly	Biological Process	1	B3KRB7
5	GO:0032270	positive regulation of cellular protein metabolic process	Biological Process	10	B4E1V0, Q71UM5, Q9BVP2, B2R4U3, A0A024RDF4, B4DQK1, Q9ULW0, Q99988, P16402, B2RA70
5	GO:0051053	negative regulation of DNA metabolic process	Biological Process	2	Q8N4P8, B2RA70
5	GO:0070997	neuron death	Biological Process	1	Q92876
5	GO:0034097	response to cytokine	Biological Process	4	P60604, A8YQF4, B3KRB7, B2RA70
5	GO:0051851	modification by host of symbiont morphology or physiology	Biological Process	1	B4E1V0
5	GO:2000266	regulation of blood coagulation, intrinsic pathway	Biological Process	1	Q8IZZ8
5	GO:0034440	lipid oxidation	Biological Process	1	Q96RG4
5	GO:0006119	oxidative phosphorylation	Biological Process	1	P09669
5	GO:0043434	response to peptide hormone	Biological Process	3	Q96RG4, P63218, B2RA70
5	GO:1903792	negative regulation of anion transport	Biological Process	1	Q96RG4
5	GO:0001867	complement activation, lectin pathway	Biological Process	1	P01023
5	GO:0042742	defense response to bacterium	Biological Process	2	P62861, B4E1V0
5	GO:0031347	regulation of defense response	Biological Process	5	A8MW49, B4E1V0, B3KRB7, B2RA70, P01023
5	GO:0061025	membrane fusion	Biological Process	1	B4DQK1
5	GO:0051180	vitamin transport	Biological Process	1	D6RBJ7
5	GO:0006757	ATP generation from ADP	Biological Process	1	B3KMT5
5	GO:1901565	organonitrogen compound catabolic process	Biological Process	1	O75487
5	GO:0048147	negative regulation of fibroblast proliferation	Biological Process	1	G3V1D1
5	GO:1901605	alpha-amino acid metabolic process	Biological Process	2	B3KRB7, P48506
5	GO:0006471	protein ADP-ribosylation	Biological Process	1	Q15397
5	GO:0022617	extracellular matrix disassembly	Biological Process	2	P07477, P01023
5	GO:0019732	antifungal humoral response	Biological Process	1	B4E1V0
5	GO:0006886	intracellular protein transport	Biological Process	13	Q9Y3U8, S4R456, P60604, C9K025, M0R0F0, Q71UM5, P62081, P62861, P63173, P50914, A0A087WXM6, P39023, D3YTB1
5	GO:0022904	respiratory electron transport chain	Biological Process	1	P09669
5	GO:0051253	negative regulation of RNA metabolic process	Biological Process	4	A0A1B0GVI7, Q53RD8, P48506, P16402
5	GO:0045931	positive regulation of mitotic cell cycle	Biological Process	2	A8K4B4, B2R4U3
5	GO:0007346	regulation of mitotic cell cycle	Biological Process	4	A8K4B4, Q71UM5, B2R4U3, Q9ULW0
5	GO:1903037	regulation of leukocyte cell-cell adhesion	Biological Process	2	Q53RD8, B2RA70
5	GO:0032881	regulation of polysaccharide metabolic process	Biological Process	1	Q96RG4
5	GO:0007067	mitotic nuclear division	Biological Process	4	A8K4B4, B2R4U3, A8K7A2, Q9ULW0
5	GO:0050000	chromosome localization	Biological Process	1	A8K7A2
5	GO:0006638	neutral lipid metabolic process	Biological Process	1	A8MW49
5	GO:0071705	nitrogen compound transport	Biological Process	2	B7Z8Q4, A0A024RDF4
5	GO:0034645	cellular macromolecule biosynthetic process	Biological Process	44	Q9Y3U8, Q96RG4, B4E1V0, C9K025, Q71UM5, Q9BW34, Q9BVP2, Q6DKI1, P31350, P62081, Q53RD8, Q8TDD1, B4DTK6, A0A1B0GVI7, P50914, A0A087WXM6, P39023, B4DQK1, I3L1D4, B3KRB7, P48506, Q99988, F1JVV5, Q6FHK1, Q7Z6E9, S4R456, P60604, Q8N4P8, M0R0F0, B3KMT5, Q4G148, A0A024RDF4, Q5T7U1, Q9Y6H1, B3KS36, P16402, K7ER90, Q6IAM0, P62861, B4DUP5, P63173, D3YTB1, B2RA70, Q15397
5	GO:0008015	blood circulation	Biological Process	2	P48506, B2RA70
5	GO:0006900	membrane budding	Biological Process	1	B0AZV9
5	GO:0002064	epithelial cell development	Biological Process	1	B3KRB7
5	GO:0043588	skin development	Biological Process	1	B1ALI9
5	GO:0043094	cellular metabolic compound salvage	Biological Process	1	A0A140VJE0
5	GO:0071426	ribonucleoprotein complex export from nucleus	Biological Process	1	S4R456
5	GO:0042542	response to hydrogen peroxide	Biological Process	1	A8MW49
5	GO:0071594	thymocyte aggregation	Biological Process	1	Q53RD8
5	GO:0008202	steroid metabolic process	Biological Process	6	Q16678, D6RBJ7, B4DE67, B3KRC6, B4DE48, Q15125
5	GO:0048285	organelle fission	Biological Process	4	A8K4B4, B2R4U3, A8K7A2, Q9ULW0
5	GO:0010676	positive regulation of cellular carbohydrate metabolic process	Biological Process	1	Q96RG4
5	GO:0045333	cellular respiration	Biological Process	1	P09669
5	GO:0061572	actin filament bundle organization	Biological Process	1	B2RA70
5	GO:0097577	sequestering of iron ion	Biological Process	1	G3V1D1
5	GO:0061640	cytoskeleton-dependent cytokinesis	Biological Process	1	A8K4B4
5	GO:0051246	regulation of protein metabolic process	Biological Process	23	A8MW49, P60604, B4E1V0, M0R0F0, Q8N4P8, Q71UM5, Q9BW34, Q9BVP2, Q8IZZ8, A0A024RDF4, B7Z8R6, P16402, K7ER90, Q6IAM0, B4DUP5, B2R4U3, B4DQK1, Q9ULW0, B3KRB7, Q99988, B2RA70, Q15397, P01023
5	GO:0007052	mitotic spindle organization	Biological Process	1	Q9ULW0
5	GO:0071560	cellular response to transforming growth factor beta stimulus	Biological Process	2	Q99988, B2RA70
5	GO:0010721	negative regulation of cell development	Biological Process	1	B4E1V0
5	GO:0050688	regulation of defense response to virus	Biological Process	1	A8MW49
5	GO:0045948	positive regulation of translational initiation	Biological Process	1	Q71UM5
5	GO:0051881	regulation of mitochondrial membrane potential	Biological Process	1	B2RA70
5	GO:0006665	sphingolipid metabolic process	Biological Process	1	A0A087WVA8
5	GO:0045089	positive regulation of innate immune response	Biological Process	3	B4E1V0, B3KRB7, B2RA70
5	GO:0000070	mitotic sister chromatid segregation	Biological Process	2	A8K4B4, A8K7A2
5	GO:0075525	viral translational termination-reinitiation	Biological Process	2	K7ER90, Q6IAM0
5	GO:0071219	cellular response to molecule of bacterial origin	Biological Process	1	B4E1V0
5	GO:0000423	macromitophagy	Biological Process	1	A8MW49
5	GO:0051439	regulation of ubiquitin-protein ligase activity involved in mitotic cell cycle	Biological Process	1	B2R4U3
5	GO:0007076	mitotic chromosome condensation	Biological Process	1	A8K4B4
5	GO:0045745	positive regulation of G-protein coupled receptor protein signaling pathway	Biological Process	1	Q92876
5	GO:0044271	cellular nitrogen compound biosynthetic process	Biological Process	37	Q9Y3U8, C9K025, B4E1V0, Q71UM5, Q9BW34, Q9BVP2, Q6DKI1, P31350, P62081, Q53RD8, B4DTK6, O60701, A0A1B0GVI7, P50914, A0A087WXM6, P39023, A0A140VJE0, B3KRB7, P48506, F1JVV5, Q6FHK1, S4R456, M0R0F0, B3KMT5, A0A024RDF4, Q5T7U1, Q9Y6H1, B3KS36, P16402, K7ER90, Q6IAM0, P62861, B4DUP5, P63173, D3YTB1, B2RA70, Q15397
5	GO:0045935	positive regulation of nucleobase-containing compound metabolic process	Biological Process	8	A0A1B0GVI7, Q9BVP2, B3KMT5, Q9Y6H1, B3KRB7, Q53RD8, P11388, F1JVV5
5	GO:0000226	microtubule cytoskeleton organization	Biological Process	3	A8K4B4, Q9P1Y5, Q9ULW0
5	GO:0031667	response to nutrient levels	Biological Process	2	B4DQK1, F6KPG5
5	GO:0034248	regulation of cellular amide metabolic process	Biological Process	8	K7ER90, Q6IAM0, B4DUP5, M0R0F0, Q9BW34, Q71UM5, A0A024RDF4, Q15397
5	GO:0043470	regulation of carbohydrate catabolic process	Biological Process	1	B3KMT5
5	GO:0008210	estrogen metabolic process	Biological Process	2	Q16678, Q15125
5	GO:0071824	protein-DNA complex subunit organization	Biological Process	1	P16402
5	GO:0044843	cell cycle G1/S phase transition	Biological Process	2	Q71UM5, P31350
5	GO:0051252	regulation of RNA metabolic process	Biological Process	15	Q12872, B4E1V0, Q9BVP2, B3KMT5, A0A024RDF4, P31350, Q9Y6H1, Q53RD8, P11388, P16402, A0A1B0GVI7, I3L1D4, B3KRB7, P48506, F1JVV5
5	GO:0043413	macromolecule glycosylation	Biological Process	3	P60604, Q4G148, Q15397
5	GO:0048858	cell projection morphogenesis	Biological Process	1	B2RA70
5	GO:1901361	organic cyclic compound catabolic process	Biological Process	13	Q9Y3U8, S4R456, C9K025, M0R0F0, Q71UM5, P62081, B4DE48, P62861, P63173, P50914, A0A087WXM6, P39023, D3YTB1
5	GO:1902850	microtubule cytoskeleton organization involved in mitosis	Biological Process	1	Q9ULW0
5	GO:0051336	regulation of hydrolase activity	Biological Process	11	A8MW49, B4DUP5, Q96RG4, B4E1V0, Q9P1Y5, Q71UM5, Q5T123, B3KRB7, B2RA70, Q96HP0, P01023
5	GO:0090136	epithelial cell-cell adhesion	Biological Process	1	Q9P1Y5
5	GO:0043069	negative regulation of programmed cell death	Biological Process	5	A8MW49, F6KPG5, B3KRB7, P48506, B2RA70
5	GO:0010639	negative regulation of organelle organization	Biological Process	1	B2RA70
5	GO:0019219	regulation of nucleobase-containing compound metabolic process	Biological Process	20	Q12872, Q8N4P8, B4E1V0, Q9BVP2, B3KMT5, A0A024RDF4, P31350, Q9Y6H1, Q53RD8, P16402, P11388, A0A1B0GVI7, B2R4U3, B3KRB7, I3L1D4, P48506, B2RA70, F1JVV5, Q99988, Q7Z6E9
5	GO:1901137	carbohydrate derivative biosynthetic process	Biological Process	7	O60701, P60604, B3KM35, Q4G148, O75487, A0A140VJE0, Q15397
5	GO:1901616	organic hydroxy compound catabolic process	Biological Process	1	B4DE48
5	GO:0006325	chromatin organization	Biological Process	2	Q5JXX1, P16402
5	GO:0045216	cell-cell junction organization	Biological Process	2	Q9P1Y5, B3KRB7
5	GO:0019048	modulation by virus of host morphology or physiology	Biological Process	1	B4DQK1
5	GO:0050654	chondroitin sulfate proteoglycan metabolic process	Biological Process	1	Q4G148
5	GO:0005996	monosaccharide metabolic process	Biological Process	1	Q96RG4
5	GO:0048199	vesicle targeting, to, from or within Golgi	Biological Process	1	B0AZV9
5	GO:0007596	blood coagulation	Biological Process	4	Q8IZZ8, B2RA70, P01023, Q96HP0
5	GO:0046651	lymphocyte proliferation	Biological Process	1	A0A1B0GVI7
5	GO:0060485	mesenchyme development	Biological Process	1	I3L2L5
5	GO:0006487	protein N-linked glycosylation	Biological Process	1	P60604
5	GO:0098657	import into cell	Biological Process	1	H7C5E8
5	GO:1901566	organonitrogen compound biosynthetic process	Biological Process	27	Q9Y3U8, C9K025, Q71UM5, Q9BW34, Q6DKI1, O75487, P62081, O60701, P50914, A0A087WXM6, P39023, A0A140VJE0, P48506, Q6FHK1, S4R456, B3KM35, M0R0F0, A0A024RDF4, Q4G148, B3KS36, K7ER90, Q6IAM0, P62861, B4DUP5, P63173, D3YTB1, Q15397
5	GO:0070848	response to growth factor	Biological Process	2	Q99988, B2RA70
5	GO:0038096	Fc-gamma receptor signaling pathway involved in phagocytosis	Biological Process	1	B2RA70
5	GO:0046903	secretion	Biological Process	4	H7C5E8, F6KPG5, B2RA70, P01023
5	GO:1903010	regulation of bone development	Biological Process	1	B4E1V0
5	GO:0044265	cellular macromolecule catabolic process	Biological Process	17	Q9Y3U8, S4R456, P60604, C9K025, M0R0F0, G5E9A6, Q71UM5, P62081, Q53EY9, P62861, P63173, P50914, A0A087WXM6, P39023, B2R4U3, D3YTB1, Q7Z6E9
5	GO:1901652	response to peptide	Biological Process	3	Q96RG4, P63218, B2RA70
5	GO:0005985	sucrose metabolic process	Biological Process	1	O60701
5	GO:0006888	ER to Golgi vesicle-mediated transport	Biological Process	1	B0AZV9
5	GO:0044264	cellular polysaccharide metabolic process	Biological Process	2	O60701, Q96RG4
5	GO:0044282	small molecule catabolic process	Biological Process	2	Q96RG4, B4DE48
5	GO:0060236	regulation of mitotic spindle organization	Biological Process	1	Q9ULW0
5	GO:0034145	positive regulation of toll-like receptor 4 signaling pathway	Biological Process	1	B4E1V0
5	GO:0007088	regulation of mitotic nuclear division	Biological Process	2	A8K4B4, B2R4U3
5	GO:0006869	lipid transport	Biological Process	2	Q96RG4, F6KPG5
5	GO:0002478	antigen processing and presentation of exogenous peptide antigen	Biological Process	1	A8YQF4
5	GO:0032990	cell part morphogenesis	Biological Process	1	B2RA70
5	GO:1901987	regulation of cell cycle phase transition	Biological Process	2	Q71UM5, B2R4U3
5	GO:0001959	regulation of cytokine-mediated signaling pathway	Biological Process	1	B3KRB7
5	GO:0031328	positive regulation of cellular biosynthetic process	Biological Process	10	Q96RG4, A0A1B0GVI7, Q9BVP2, B3KMT5, Q71UM5, A0A024RDF4, Q9Y6H1, B3KRB7, Q53RD8, F1JVV5
5	GO:1902582	single-organism intracellular transport	Biological Process	12	Q9Y3U8, S4R456, C9K025, M0R0F0, Q71UM5, P62081, P62861, P63173, P50914, A0A087WXM6, P39023, D3YTB1
5	GO:0007600	sensory perception	Biological Process	1	Q16678
5	GO:0072521	purine-containing compound metabolic process	Biological Process	3	P09669, B3KMT5, A0A140VJE0
5	GO:1901678	iron coordination entity transport	Biological Process	1	B7Z8Q4
5	GO:0008643	carbohydrate transport	Biological Process	1	Q96RG4
5	GO:1901701	cellular response to oxygen-containing compound	Biological Process	5	A8MW49, Q96RG4, B4E1V0, P63218, B2RA70
5	GO:0030574	collagen catabolic process	Biological Process	1	P07477
5	GO:0042110	T cell activation	Biological Process	3	Q53RD8, B2RA70, Q96HP0
5	GO:0030522	intracellular receptor signaling pathway	Biological Process	2	Q8TDD1, B3KRB7
5	GO:0032870	cellular response to hormone stimulus	Biological Process	4	Q8TDD1, Q96RG4, P63218, B2RA70
5	GO:0032890	regulation of organic acid transport	Biological Process	1	Q96RG4
5	GO:0006631	fatty acid metabolic process	Biological Process	4	O00767, Q96RG4, Q16678, A0A024R172
5	GO:0050996	positive regulation of lipid catabolic process	Biological Process	1	Q96RG4
5	GO:1904229	regulation of succinate dehydrogenase activity	Biological Process	1	G3V1D1
5	GO:0016482	cytosolic transport	Biological Process	1	B2RA70
5	GO:0016054	organic acid catabolic process	Biological Process	1	Q96RG4
5	GO:0034340	response to type I interferon	Biological Process	1	A8YQF4
5	GO:0090092	regulation of transmembrane receptor protein serine/threonine kinase signaling pathway	Biological Process	1	Q99988
5	GO:0032956	regulation of actin cytoskeleton organization	Biological Process	2	Q5T123, B2RA70
5	GO:0043067	regulation of programmed cell death	Biological Process	11	A8MW49, Q71UM5, B4DQK1, F6KPG5, B3KRB7, Q53RD8, P48506, B2RA70, Q99988, P11388, F6TR53
5	GO:0051100	negative regulation of binding	Biological Process	1	Q8N4P8
5	GO:0043068	positive regulation of programmed cell death	Biological Process	5	Q71UM5, B4DQK1, Q53RD8, P11388, B2RA70
5	GO:0009225	nucleotide-sugar metabolic process	Biological Process	1	O60701
5	GO:0000278	mitotic cell cycle	Biological Process	6	A8K4B4, Q71UM5, B2R4U3, A8K7A2, P31350, Q9ULW0
5	GO:0034331	cell junction maintenance	Biological Process	1	Q9P1Y5
5	GO:1903900	regulation of viral life cycle	Biological Process	2	B4E1V0, P11388
5	GO:1902533	positive regulation of intracellular signal transduction	Biological Process	4	B4E1V0, Q9BW34, B3KRB7, B2RA70
5	GO:1903902	positive regulation of viral life cycle	Biological Process	1	P11388
5	GO:0045923	positive regulation of fatty acid metabolic process	Biological Process	1	Q96RG4
5	GO:0060429	epithelium development	Biological Process	2	B1ALI9, B3KRB7
5	GO:0090132	epithelium migration	Biological Process	3	Q5T123, P07477, B2RA70
5	GO:2001234	negative regulation of apoptotic signaling pathway	Biological Process	1	B2RA70
5	GO:0033688	regulation of osteoblast proliferation	Biological Process	1	B4E1V0
5	GO:0050727	regulation of inflammatory response	Biological Process	1	P01023
5	GO:0030100	regulation of endocytosis	Biological Process	2	H7C5E8, B2RA70
5	GO:0044724	single-organism carbohydrate catabolic process	Biological Process	1	B3KMT5
5	GO:0043393	regulation of protein binding	Biological Process	1	Q8N4P8
5	GO:0051251	positive regulation of lymphocyte activation	Biological Process	1	B2RA70
5	GO:0034599	cellular response to oxidative stress	Biological Process	2	A8MW49, Q16678
5	GO:0043488	regulation of mRNA stability	Biological Process	1	A0A024RDF4
5	GO:0006493	protein O-linked glycosylation	Biological Process	1	Q4G148
5	GO:0051181	cofactor transport	Biological Process	1	B7Z8Q4
5	GO:0002385	mucosal immune response	Biological Process	2	P62861, B4E1V0
5	GO:0016241	regulation of macroautophagy	Biological Process	1	B4DQK1
5	GO:0015031	protein transport	Biological Process	16	Q9Y3U8, S4R456, P60604, C9K025, M0R0F0, Q71UM5, P62081, B4DE48, P62861, P63173, P50914, A0A087WXM6, P39023, H7C5E8, D3YTB1, B2RA70
5	GO:0006766	vitamin metabolic process	Biological Process	2	D6RBJ7, P07477
5	GO:0010717	regulation of epithelial to mesenchymal transition	Biological Process	1	I3L2L5
5	GO:0060249	anatomical structure homeostasis	Biological Process	5	B4E1V0, Q9BVP2, H7C5E8, F6KPG5, B2RA70
5	GO:1900037	regulation of cellular response to hypoxia	Biological Process	1	Q9Y6H1
5	GO:0044272	sulfur compound biosynthetic process	Biological Process	4	O00767, B3KM35, Q4G148, P48506
5	GO:0016051	carbohydrate biosynthetic process	Biological Process	1	Q96RG4
5	GO:0034613	cellular protein localization	Biological Process	16	Q9Y3U8, S4R456, P60604, C9K025, M0R0F0, Q9BVP2, Q71UM5, P62081, P16402, P62861, P63173, P50914, A0A087WXM6, P39023, D3YTB1, B3KRB7
5	GO:0042177	negative regulation of protein catabolic process	Biological Process	1	P60604
5	GO:0007005	mitochondrion organization	Biological Process	3	A8MW49, B4DQK1, Q6FHK1
5	GO:0022408	negative regulation of cell-cell adhesion	Biological Process	2	Q8N4P8, Q53RD8
5	GO:0016050	vesicle organization	Biological Process	1	B0AZV9
5	GO:1900229	negative regulation of single-species biofilm formation in or on host organism	Biological Process	1	B4E1V0
5	GO:0000281	mitotic cytokinesis	Biological Process	1	A8K4B4
5	GO:0000236	mitotic prometaphase	Biological Process	2	Q71UM5, A8K7A2
5	GO:0006749	glutathione metabolic process	Biological Process	1	P48506
5	GO:0090100	positive regulation of transmembrane receptor protein serine/threonine kinase signaling pathway	Biological Process	1	Q99988
5	GO:0046545	development of primary female sexual characteristics	Biological Process	1	B4DUP5
5	GO:0006796	phosphate-containing compound metabolic process	Biological Process	16	P09669, Q9ULR3, B4E1V0, Q96RG4, Q8N4P8, Q9P1Y5, B3KMT5, B7Z8R6, P31350, O60701, B4DMI9, A0A140VJE0, Q9ULW0, B3KRB7, Q99988, B2RA70
5	GO:0044772	mitotic cell cycle phase transition	Biological Process	4	Q71UM5, B2R4U3, P31350, Q9ULW0
5	GO:0042692	muscle cell differentiation	Biological Process	1	O00458
5	GO:0071417	cellular response to organonitrogen compound	Biological Process	3	Q96RG4, P63218, B2RA70
5	GO:0051646	mitochondrion localization	Biological Process	1	F6KPG5
5	GO:0031175	neuron projection development	Biological Process	1	Q9P1Y5
5	GO:0071702	organic substance transport	Biological Process	20	Q9Y3U8, S4R456, P60604, Q96RG4, C9K025, M0R0F0, Q71UM5, B7Z8Q4, A0A024RDF4, P62081, B4DE48, F6KPG5, P62861, P63173, P50914, A0A087WXM6, P39023, H7C5E8, D3YTB1, B2RA70
5	GO:0042574	retinal metabolic process	Biological Process	1	Q16678
5	GO:0030204	chondroitin sulfate metabolic process	Biological Process	1	Q4G148
5	GO:0009755	hormone-mediated signaling pathway	Biological Process	1	Q8TDD1
5	GO:0009112	nucleobase metabolic process	Biological Process	2	A0A140VJE0, B7Z2S5
5	GO:0043269	regulation of ion transport	Biological Process	1	Q96RG4
5	GO:0019083	viral transcription	Biological Process	12	Q9Y3U8, S4R456, P62861, C9K025, P63173, M0R0F0, P50914, Q71UM5, A0A087WXM6, P39023, D3YTB1, P62081
5	GO:0015849	organic acid transport	Biological Process	2	Q96RG4, F6KPG5
5	GO:0044010	single-species biofilm formation	Biological Process	1	B4E1V0
5	GO:0006461	protein complex assembly	Biological Process	4	B2R4U3, B0AZV9, B2RA70, P16402
5	GO:0035384	thioester biosynthetic process	Biological Process	1	O00767
5	GO:0030336	negative regulation of cell migration	Biological Process	1	Q8N4P8
5	GO:0051310	metaphase plate congression	Biological Process	1	A8K7A2
5	GO:0045667	regulation of osteoblast differentiation	Biological Process	1	B4E1V0
5	GO:1902106	negative regulation of leukocyte differentiation	Biological Process	1	Q53RD8
5	GO:0097190	apoptotic signaling pathway	Biological Process	2	Q71UM5, B2RA70
5	GO:1903513	endoplasmic reticulum to cytosol transport	Biological Process	1	P60604
5	GO:0042060	wound healing	Biological Process	4	Q8IZZ8, B2RA70, Q96HP0, P01023
5	GO:0044003	modification by symbiont of host morphology or physiology	Biological Process	2	B4DQK1, F6KPG5
5	GO:0034341	response to interferon-gamma	Biological Process	1	A8YQF4
5	GO:0033753	establishment of ribosome localization	Biological Process	1	S4R456
5	GO:0034329	cell junction assembly	Biological Process	1	B3KRB7
5	GO:0010558	negative regulation of macromolecule biosynthetic process	Biological Process	6	A0A1B0GVI7, Q8N4P8, Q53RD8, P48506, B2RA70, P16402
5	GO:0031570	DNA integrity checkpoint	Biological Process	1	Q71UM5
5	GO:0070875	positive regulation of glycogen metabolic process	Biological Process	1	Q96RG4
5	GO:0051818	disruption of cells of other organism involved in symbiotic interaction	Biological Process	1	F6KPG5
5	GO:0051657	maintenance of organelle location	Biological Process	1	F6KPG5
5	GO:0031331	positive regulation of cellular catabolic process	Biological Process	2	Q96RG4, B2R4U3
5	GO:0039519	modulation by virus of host autophagy	Biological Process	1	B4DQK1
5	GO:0036211	protein modification process	Biological Process	24	Q9ULR3, G5E9A6, Q96RG4, B4E1V0, Q9BVP2, Q53EY9, P11388, B2R4U3, B4DMI9, A8K7A2, B4DQK1, Q9ULW0, B3KRB7, Q99988, Q7Z6E9, P60604, Q8N4P8, Q8TB52, Q4G148, B7Z8R6, Q5JXX1, P16402, B2RA70, Q15397
5	GO:0030832	regulation of actin filament length	Biological Process	1	Q5T123
5	GO:0006732	coenzyme metabolic process	Biological Process	2	O00767, B3KMT5
5	GO:0051801	cytolysis in other organism involved in symbiotic interaction	Biological Process	1	F6KPG5
5	GO:1904356	regulation of telomere maintenance via telomere lengthening	Biological Process	1	B2RA70
5	GO:0044267	cellular protein metabolic process	Biological Process	47	Q9Y3U8, Q9ULR3, G5E9A6, Q96RG4, B4E1V0, C9K025, Q71UM5, Q9BW34, Q6DKI1, Q9BVP2, P62081, Q53EY9, P11388, P50914, B2R4U3, A0A087WXM6, P39023, B4DMI9, A8K7A2, B4DQK1, Q9ULW0, B3KRB7, Q99988, Q6FHK1, Q7Z6E9, S4R456, A8MW49, P60604, M0R0F0, Q8N4P8, Q8IZZ8, Q8TB52, Q4G148, A0A024RDF4, B7Z8R6, B3KS36, Q5JXX1, P16402, K7ER90, Q6IAM0, P62861, B4DUP5, P63173, D3YTB1, B2RA70, Q15397, P01023
5	GO:0010039	response to iron ion	Biological Process	1	H7C5E8
5	GO:0006643	membrane lipid metabolic process	Biological Process	2	A0A087WVA8, B3KM35
5	GO:0050658	RNA transport	Biological Process	1	A0A024RDF4
5	GO:0032984	macromolecular complex disassembly	Biological Process	2	Q5T123, Q6FHK1
5	GO:0090407	organophosphate biosynthetic process	Biological Process	1	A0A140VJE0
5	GO:0051046	regulation of secretion	Biological Process	1	B2RA70
5	GO:0030258	lipid modification	Biological Process	1	Q96RG4
5	GO:0097581	lamellipodium organization	Biological Process	1	B2RA70
5	GO:0071455	cellular response to hyperoxia	Biological Process	1	B4DQK1
5	GO:0034766	negative regulation of ion transmembrane transport	Biological Process	1	Q96RG4
5	GO:1904029	regulation of cyclin-dependent protein kinase activity	Biological Process	1	Q8N4P8
5	GO:0031098	stress-activated protein kinase signaling cascade	Biological Process	2	B7Z8R6, B3KRB7
5	GO:0034762	regulation of transmembrane transport	Biological Process	1	Q96RG4
5	GO:0006109	regulation of carbohydrate metabolic process	Biological Process	2	Q96RG4, B3KMT5
5	GO:0072657	protein localization to membrane	Biological Process	13	Q9Y3U8, S4R456, C9K025, M0R0F0, Q71UM5, P62081, P62861, P63173, P50914, A0A087WXM6, P39023, D3YTB1, B3KRB7
5	GO:0051254	positive regulation of RNA metabolic process	Biological Process	8	A0A1B0GVI7, Q9BVP2, B3KMT5, Q9Y6H1, B3KRB7, Q53RD8, P11388, F1JVV5
5	GO:0031346	positive regulation of cell projection organization	Biological Process	1	B2RA70
5	GO:0019438	aromatic compound biosynthetic process	Biological Process	29	Q9Y3U8, C9K025, B4E1V0, Q9BW34, Q71UM5, Q9BVP2, P31350, P62081, Q53RD8, B4DTK6, O60701, A0A1B0GVI7, P50914, A0A087WXM6, P39023, A0A140VJE0, B3KRB7, P48506, F1JVV5, S4R456, M0R0F0, B3KMT5, Q5T7U1, Q9Y6H1, P16402, P62861, P63173, D3YTB1, B2RA70
5	GO:0012501	programmed cell death	Biological Process	12	A8MW49, Q71UM5, F6KPG5, Q53RD8, P11388, A0A1B0GVI7, B4DQK1, B3KRB7, P48506, B2RA70, Q99988, F6TR53
5	GO:1901988	negative regulation of cell cycle phase transition	Biological Process	1	Q71UM5
5	GO:0043029	T cell homeostasis	Biological Process	1	Q53RD8
5	GO:1903146	regulation of mitophagy	Biological Process	1	B4DQK1
5	GO:0051247	positive regulation of protein metabolic process	Biological Process	10	B4E1V0, Q71UM5, Q9BVP2, B2R4U3, A0A024RDF4, B4DQK1, Q9ULW0, Q99988, P16402, B2RA70
5	GO:0050769	positive regulation of neurogenesis	Biological Process	1	B2RA70
5	GO:0042339	keratan sulfate metabolic process	Biological Process	1	B3KM35
5	GO:0051225	spindle assembly	Biological Process	1	Q9ULW0
5	GO:0031327	negative regulation of cellular biosynthetic process	Biological Process	6	A0A1B0GVI7, Q8N4P8, Q53RD8, P48506, B2RA70, P16402
5	GO:0008154	actin polymerization or depolymerization	Biological Process	1	Q5T123
5	GO:0006887	exocytosis	Biological Process	4	H7C5E8, F6KPG5, B2RA70, P01023
5	GO:0008209	androgen metabolic process	Biological Process	1	Q15125
5	GO:0010628	positive regulation of gene expression	Biological Process	9	A0A1B0GVI7, Q9BVP2, B3KMT5, Q71UM5, A0A024RDF4, Q9Y6H1, B3KRB7, Q53RD8, F1JVV5
5	GO:0031344	regulation of cell projection organization	Biological Process	1	B2RA70
5	GO:0001501	skeletal system development	Biological Process	2	B4E1V0, Q15125
5	GO:1901617	organic hydroxy compound biosynthetic process	Biological Process	2	B3KRC6, Q15125
5	GO:0071826	ribonucleoprotein complex subunit organization	Biological Process	3	Q12872, P63173, H3BMQ2
5	GO:0016239	positive regulation of macroautophagy	Biological Process	1	B4DQK1
5	GO:0071241	cellular response to inorganic substance	Biological Process	1	H7C5E8
5	GO:0048666	neuron development	Biological Process	1	Q9P1Y5
5	GO:0035556	intracellular signal transduction	Biological Process	11	B4E1V0, Q96RG4, Q9BW34, Q71UM5, B7Z8R6, Q9ULW0, B3KRB7, B2RA70, Q99988, P01023, Q96HP0
5	GO:0007010	cytoskeleton organization	Biological Process	7	A8K4B4, Q9P1Y5, Q5T123, Q9ULW0, B3KRB7, B2RA70, Q96HP0
5	GO:0044283	small molecule biosynthetic process	Biological Process	4	O00767, B4DE67, B3KRC6, Q15125
6	GO:0006206	pyrimidine nucleobase metabolic process	Biological Process	1	B7Z2S5
6	GO:0051345	positive regulation of hydrolase activity	Biological Process	2	Q71UM5, Q5T123
6	GO:2001236	regulation of extrinsic apoptotic signaling pathway	Biological Process	1	B2RA70
6	GO:0043604	amide biosynthetic process	Biological Process	22	Q9Y3U8, S4R456, C9K025, M0R0F0, Q71UM5, Q9BW34, Q6DKI1, A0A024RDF4, P62081, B3KS36, P62861, K7ER90, Q6IAM0, P63173, P50914, B4DUP5, A0A087WXM6, P39023, D3YTB1, P48506, Q6FHK1, Q15397
6	GO:0006260	DNA replication	Biological Process	2	Q8N4P8, Q7Z6E9
6	GO:0001895	retina homeostasis	Biological Process	3	B4E1V0, H7C5E8, F6KPG5
6	GO:0051196	regulation of coenzyme metabolic process	Biological Process	1	B3KMT5
6	GO:0042590	antigen processing and presentation of exogenous peptide antigen via MHC class I	Biological Process	1	A8YQF4
6	GO:0031536	positive regulation of exit from mitosis	Biological Process	1	B2R4U3
6	GO:0070301	cellular response to hydrogen peroxide	Biological Process	1	A8MW49
6	GO:0071248	cellular response to metal ion	Biological Process	1	H7C5E8
6	GO:0015886	heme transport	Biological Process	1	B7Z8Q4
6	GO:0033081	regulation of T cell differentiation in thymus	Biological Process	1	Q53RD8
6	GO:0032000	positive regulation of fatty acid beta-oxidation	Biological Process	1	Q96RG4
6	GO:0010906	regulation of glucose metabolic process	Biological Process	1	Q96RG4
6	GO:0010835	regulation of protein ADP-ribosylation	Biological Process	1	Q15397
6	GO:0008064	regulation of actin polymerization or depolymerization	Biological Process	1	Q5T123
6	GO:0046461	neutral lipid catabolic process	Biological Process	1	A8MW49
6	GO:0016126	sterol biosynthetic process	Biological Process	2	B3KRC6, Q15125
6	GO:0071357	cellular response to type I interferon	Biological Process	1	A8YQF4
6	GO:0000271	polysaccharide biosynthetic process	Biological Process	1	Q96RG4
6	GO:0009069	serine family amino acid metabolic process	Biological Process	2	B3KRB7, P48506
6	GO:0010001	glial cell differentiation	Biological Process	1	B4DUP5
6	GO:0044773	mitotic DNA damage checkpoint	Biological Process	1	Q71UM5
6	GO:0009101	glycoprotein biosynthetic process	Biological Process	3	P60604, Q4G148, Q15397
6	GO:0006123	mitochondrial electron transport, cytochrome c to oxygen	Biological Process	1	P09669
6	GO:0045070	positive regulation of viral genome replication	Biological Process	1	P11388
6	GO:0032543	mitochondrial translation	Biological Process	1	Q6FHK1
6	GO:0072331	signal transduction by p53 class mediator	Biological Process	2	Q71UM5, Q9ULW0
6	GO:0043101	purine-containing compound salvage	Biological Process	1	A0A140VJE0
6	GO:0098779	mitophagy in response to mitochondrial depolarization	Biological Process	1	A8MW49
6	GO:0010962	regulation of glucan biosynthetic process	Biological Process	1	Q96RG4
6	GO:0045601	regulation of endothelial cell differentiation	Biological Process	1	B3KRB7
6	GO:0016310	phosphorylation	Biological Process	10	P09669, Q96RG4, Q8N4P8, B4E1V0, B3KMT5, B7Z8R6, Q9ULW0, B3KRB7, Q99988, B2RA70
6	GO:0006412	translation	Biological Process	21	Q9Y3U8, S4R456, C9K025, M0R0F0, Q71UM5, Q9BW34, Q6DKI1, A0A024RDF4, P62081, B3KS36, P62861, K7ER90, Q6IAM0, P63173, P50914, B4DUP5, A0A087WXM6, P39023, D3YTB1, Q6FHK1, Q15397
6	GO:0001676	long-chain fatty acid metabolic process	Biological Process	1	Q16678
6	GO:0016071	mRNA metabolic process	Biological Process	16	Q9Y3U8, S4R456, Q12872, C9K025, M0R0F0, Q71UM5, Q9BWT3, P62081, P62861, P63173, P50914, A0A087WXM6, P39023, D3YTB1, I3L1D4, Q7Z6E9
6	GO:0045445	myoblast differentiation	Biological Process	1	O00458
6	GO:0070303	negative regulation of stress-activated protein kinase signaling cascade	Biological Process	1	B7Z8R6
6	GO:0071363	cellular response to growth factor stimulus	Biological Process	2	Q99988, B2RA70
6	GO:0006915	apoptotic process	Biological Process	12	A8MW49, A0A1B0GVI7, Q71UM5, B4DQK1, F6KPG5, B3KRB7, Q53RD8, P48506, B2RA70, Q99988, P11388, F6TR53
6	GO:0006265	DNA topological change	Biological Process	1	P11388
6	GO:0006140	regulation of nucleotide metabolic process	Biological Process	1	B3KMT5
6	GO:0006333	chromatin assembly or disassembly	Biological Process	1	P16402
6	GO:0016311	dephosphorylation	Biological Process	4	Q9ULR3, Q9P1Y5, B4DMI9, B3KRB7
6	GO:0045091	regulation of single stranded viral RNA replication via double stranded DNA intermediate	Biological Process	1	P11388
6	GO:0032868	response to insulin	Biological Process	1	Q96RG4
6	GO:0009119	ribonucleoside metabolic process	Biological Process	3	P09669, B3KMT5, A0A140VJE0
6	GO:0045725	positive regulation of glycogen biosynthetic process	Biological Process	1	Q96RG4
6	GO:0010921	regulation of phosphatase activity	Biological Process	2	Q9P1Y5, B3KRB7
6	GO:0043409	negative regulation of MAPK cascade	Biological Process	1	B7Z8R6
6	GO:0055088	lipid homeostasis	Biological Process	1	Q96RG4
6	GO:0030518	intracellular steroid hormone receptor signaling pathway	Biological Process	1	Q8TDD1
6	GO:0031401	positive regulation of protein modification process	Biological Process	8	B4E1V0, Q9BVP2, B2R4U3, B4DQK1, Q9ULW0, P16402, Q99988, B2RA70
6	GO:0002768	immune response-regulating cell surface receptor signaling pathway	Biological Process	2	B3KRB7, B2RA70
6	GO:0015749	monosaccharide transport	Biological Process	1	Q96RG4
6	GO:0001885	endothelial cell development	Biological Process	1	B3KRB7
6	GO:0000082	G1/S transition of mitotic cell cycle	Biological Process	2	Q71UM5, P31350
6	GO:1903960	negative regulation of anion transmembrane transport	Biological Process	1	Q96RG4
6	GO:0033077	T cell differentiation in thymus	Biological Process	1	Q53RD8
6	GO:0016266	O-glycan processing	Biological Process	1	Q4G148
6	GO:0019362	pyridine nucleotide metabolic process	Biological Process	1	B3KMT5
6	GO:2001252	positive regulation of chromosome organization	Biological Process	1	Q9BVP2
6	GO:0009118	regulation of nucleoside metabolic process	Biological Process	1	B3KMT5
6	GO:1903649	regulation of cytoplasmic transport	Biological Process	1	B2RA70
6	GO:0045022	early endosome to late endosome transport	Biological Process	1	B2RA70
6	GO:0030042	actin filament depolymerization	Biological Process	1	Q5T123
6	GO:0048259	regulation of receptor-mediated endocytosis	Biological Process	1	H7C5E8
6	GO:0015711	organic anion transport	Biological Process	2	Q96RG4, F6KPG5
6	GO:0071396	cellular response to lipid	Biological Process	3	Q8TDD1, B4E1V0, B2RA70
6	GO:1902745	positive regulation of lamellipodium organization	Biological Process	1	B2RA70
6	GO:0006721	terpenoid metabolic process	Biological Process	2	Q16678, O75487
6	GO:0007264	small GTPase mediated signal transduction	Biological Process	2	P01023, Q96HP0
6	GO:0032462	regulation of protein homooligomerization	Biological Process	1	B2RA70
6	GO:0015721	bile acid and bile salt transport	Biological Process	1	F6KPG5
6	GO:0051882	mitochondrial depolarization	Biological Process	1	B2RA70
6	GO:0006775	fat-soluble vitamin metabolic process	Biological Process	1	D6RBJ7
6	GO:0048208	COPII vesicle coating	Biological Process	1	B0AZV9
6	GO:0045893	positive regulation of transcription, DNA-templated	Biological Process	7	A0A1B0GVI7, Q9BVP2, B3KMT5, Q9Y6H1, B3KRB7, Q53RD8, F1JVV5
6	GO:0035872	nucleotide-binding domain, leucine rich repeat containing receptor signaling pathway	Biological Process	1	B3KRB7
6	GO:0045055	regulated exocytosis	Biological Process	3	H7C5E8, F6KPG5, P01023
6	GO:0043174	nucleoside salvage	Biological Process	1	A0A140VJE0
6	GO:0051493	regulation of cytoskeleton organization	Biological Process	3	Q9P1Y5, Q5T123, B2RA70
6	GO:0072599	establishment of protein localization to endoplasmic reticulum	Biological Process	12	Q9Y3U8, S4R456, C9K025, M0R0F0, Q71UM5, P62081, P62861, P63173, P50914, A0A087WXM6, P39023, D3YTB1
6	GO:2000113	negative regulation of cellular macromolecule biosynthetic process	Biological Process	5	Q8N4P8, Q53RD8, P48506, B2RA70, P16402
6	GO:0034622	cellular macromolecular complex assembly	Biological Process	5	Q12872, P63173, B2R4U3, H3BMQ2, P16402
6	GO:0032200	telomere organization	Biological Process	2	Q9BVP2, B2RA70
6	GO:0048017	inositol lipid-mediated signaling	Biological Process	2	Q96RG4, B2RA70
6	GO:1990778	protein localization to cell periphery	Biological Process	1	B3KRB7
6	GO:0061726	mitochondrion disassembly	Biological Process	2	A8MW49, B4DQK1
6	GO:0032885	regulation of polysaccharide biosynthetic process	Biological Process	1	Q96RG4
6	GO:0007518	myoblast fate determination	Biological Process	1	O00458
6	GO:0043066	negative regulation of apoptotic process	Biological Process	5	A8MW49, F6KPG5, B3KRB7, P48506, B2RA70
6	GO:1902743	regulation of lamellipodium organization	Biological Process	1	B2RA70
6	GO:0010458	exit from mitosis	Biological Process	1	B2R4U3
6	GO:0031058	positive regulation of histone modification	Biological Process	1	P16402
6	GO:0043122	regulation of I-kappaB kinase/NF-kappaB signaling	Biological Process	3	B4E1V0, Q9BW34, B3KRB7
6	GO:0051259	protein oligomerization	Biological Process	1	B2RA70
6	GO:0009163	nucleoside biosynthetic process	Biological Process	1	A0A140VJE0
6	GO:0031998	regulation of fatty acid beta-oxidation	Biological Process	1	Q96RG4
6	GO:0042773	ATP synthesis coupled electron transport	Biological Process	1	P09669
6	GO:1901992	positive regulation of mitotic cell cycle phase transition	Biological Process	1	B2R4U3
6	GO:0050650	chondroitin sulfate proteoglycan biosynthetic process	Biological Process	1	Q4G148
6	GO:0006376	mRNA splice site selection	Biological Process	1	Q12872
6	GO:0032872	regulation of stress-activated MAPK cascade	Biological Process	1	B7Z8R6
6	GO:0097191	extrinsic apoptotic signaling pathway	Biological Process	1	B2RA70
6	GO:0006310	DNA recombination	Biological Process	1	P11388
6	GO:0043241	protein complex disassembly	Biological Process	2	Q5T123, Q6FHK1
6	GO:0050953	sensory perception of light stimulus	Biological Process	1	Q16678
6	GO:0050801	ion homeostasis	Biological Process	5	B4E1V0, B7Z8Q4, H7C5E8, G3V1D1, B2RA70
6	GO:0034453	microtubule anchoring	Biological Process	1	Q9P1Y5
6	GO:0051896	regulation of protein kinase B signaling	Biological Process	1	B2RA70
6	GO:0043065	positive regulation of apoptotic process	Biological Process	5	Q71UM5, B4DQK1, Q53RD8, P11388, B2RA70
6	GO:0019217	regulation of fatty acid metabolic process	Biological Process	1	Q96RG4
6	GO:0014003	oligodendrocyte development	Biological Process	1	B4DUP5
6	GO:0010608	posttranscriptional regulation of gene expression	Biological Process	9	K7ER90, Q6IAM0, B4DUP5, M0R0F0, Q9BW34, Q71UM5, A0A024RDF4, I3L1D4, Q15397
6	GO:0031056	regulation of histone modification	Biological Process	1	P16402
6	GO:0044819	mitotic G1/S transition checkpoint	Biological Process	1	Q71UM5
6	GO:0006023	aminoglycan biosynthetic process	Biological Process	4	O60701, B3KM35, Q4G148, O75487
6	GO:0090307	mitotic spindle assembly	Biological Process	1	Q9ULW0
6	GO:0033365	protein localization to organelle	Biological Process	14	Q9Y3U8, S4R456, C9K025, M0R0F0, Q71UM5, Q9BVP2, P62081, P16402, P62861, P63173, P50914, A0A087WXM6, P39023, D3YTB1
6	GO:0002220	innate immune response activating cell surface receptor signaling pathway	Biological Process	1	B3KRB7
6	GO:0000723	telomere maintenance	Biological Process	2	Q9BVP2, B2RA70
6	GO:0051603	proteolysis involved in cellular protein catabolic process	Biological Process	5	P60604, G5E9A6, B2R4U3, Q53EY9, Q7Z6E9
6	GO:0071345	cellular response to cytokine stimulus	Biological Process	3	P60604, A8YQF4, B3KRB7
6	GO:1901796	regulation of signal transduction by p53 class mediator	Biological Process	1	Q9ULW0
6	GO:0051897	positive regulation of protein kinase B signaling	Biological Process	1	B2RA70
6	GO:0031497	chromatin assembly	Biological Process	1	P16402
6	GO:0033044	regulation of chromosome organization	Biological Process	2	Q9BVP2, B2RA70
6	GO:0046398	UDP-glucuronate metabolic process	Biological Process	1	O60701
6	GO:0071222	cellular response to lipopolysaccharide	Biological Process	1	B4E1V0
6	GO:0010746	regulation of plasma membrane long-chain fatty acid transport	Biological Process	1	Q96RG4
6	GO:0002431	Fc receptor mediated stimulatory signaling pathway	Biological Process	1	B2RA70
6	GO:1901550	regulation of endothelial cell development	Biological Process	1	B3KRB7
6	GO:0022008	neurogenesis	Biological Process	6	B4DUP5, Q9P1Y5, B7Z8R6, B2RA70, F1JVV5, Q96HP0
6	GO:0071103	DNA conformation change	Biological Process	3	A8K4B4, P16402, P11388
6	GO:0098927	vesicle-mediated transport between endosomal compartments	Biological Process	1	B2RA70
6	GO:0097696	STAT cascade	Biological Process	1	B3KRB7
6	GO:0070486	leukocyte aggregation	Biological Process	3	Q53RD8, B2RA70, Q96HP0
6	GO:0032211	negative regulation of telomere maintenance via telomerase	Biological Process	1	B2RA70
6	GO:0015992	proton transport	Biological Process	1	P09669
6	GO:0006355	regulation of transcription, DNA-templated	Biological Process	11	B4E1V0, A0A1B0GVI7, Q9BVP2, B3KMT5, P31350, Q9Y6H1, Q53RD8, B3KRB7, P48506, F1JVV5, P16402
6	GO:0051972	regulation of telomerase activity	Biological Process	1	B2RA70
6	GO:0007179	transforming growth factor beta receptor signaling pathway	Biological Process	2	Q99988, B2RA70
6	GO:0000077	DNA damage checkpoint	Biological Process	1	Q71UM5
6	GO:0031399	regulation of protein modification process	Biological Process	12	B4E1V0, Q8N4P8, Q9BVP2, B7Z8R6, P16402, B2R4U3, B4DQK1, Q9ULW0, B3KRB7, Q99988, B2RA70, Q15397
6	GO:0030866	cortical actin cytoskeleton organization	Biological Process	1	B3KRB7
6	GO:0006913	nucleocytoplasmic transport	Biological Process	1	S4R456
6	GO:0000280	nuclear division	Biological Process	4	A8K4B4, B2R4U3, A8K7A2, Q9ULW0
6	GO:1903362	regulation of cellular protein catabolic process	Biological Process	1	B2R4U3
6	GO:0019221	cytokine-mediated signaling pathway	Biological Process	2	A8YQF4, B3KRB7
6	GO:0030182	neuron differentiation	Biological Process	1	Q9P1Y5
6	GO:0051785	positive regulation of nuclear division	Biological Process	2	A8K4B4, B2R4U3
6	GO:0051348	negative regulation of transferase activity	Biological Process	2	B2R4U3, B2RA70
6	GO:0006281	DNA repair	Biological Process	2	Q71UM5, B2R4U3
6	GO:0099587	inorganic ion import into cell	Biological Process	1	H7C5E8
6	GO:0033341	regulation of collagen binding	Biological Process	1	Q8N4P8
6	GO:0071616	acyl-CoA biosynthetic process	Biological Process	1	O00767
6	GO:0048193	Golgi vesicle transport	Biological Process	1	B0AZV9
6	GO:0050868	negative regulation of T cell activation	Biological Process	1	Q53RD8
6	GO:0043462	regulation of ATPase activity	Biological Process	1	B4E1V0
6	GO:0000245	spliceosomal complex assembly	Biological Process	1	Q12872
6	GO:0045892	negative regulation of transcription, DNA-templated	Biological Process	3	Q53RD8, P48506, P16402
6	GO:0071383	cellular response to steroid hormone stimulus	Biological Process	1	Q8TDD1
6	GO:1902652	secondary alcohol metabolic process	Biological Process	3	B3KRC6, B4DE48, Q15125
6	GO:0051347	positive regulation of transferase activity	Biological Process	4	B4E1V0, B2R4U3, Q9ULW0, B2RA70
6	GO:1901991	negative regulation of mitotic cell cycle phase transition	Biological Process	1	Q71UM5
6	GO:0032527	protein exit from endoplasmic reticulum	Biological Process	1	P60604
6	GO:0030262	apoptotic nuclear changes	Biological Process	1	P11388
6	GO:0045862	positive regulation of proteolysis	Biological Process	2	Q71UM5, B2R4U3
6	GO:0042981	regulation of apoptotic process	Biological Process	11	A8MW49, Q71UM5, B4DQK1, F6KPG5, B3KRB7, Q53RD8, P48506, P11388, B2RA70, Q99988, F6TR53
6	GO:0019752	carboxylic acid metabolic process	Biological Process	9	O00767, Q96RG4, Q16678, B3KMT5, B4DE67, B3KRC6, P48506, A0A024R172, Q5HYD9
6	GO:1904814	regulation of protein localization to chromosome, telomeric region	Biological Process	1	Q9BVP2
6	GO:0032774	RNA biosynthetic process	Biological Process	26	Q9Y3U8, C9K025, B4E1V0, Q71UM5, Q9BVP2, Q9BW34, P31350, P62081, Q53RD8, B4DTK6, P50914, A0A1B0GVI7, A0A087WXM6, P39023, B3KRB7, P48506, F1JVV5, S4R456, M0R0F0, B3KMT5, Q5T7U1, Q9Y6H1, P16402, P62861, P63173, D3YTB1
6	GO:0050851	antigen receptor-mediated signaling pathway	Biological Process	2	B3KRB7, B2RA70
6	GO:0016569	chromatin modification	Biological Process	2	Q5JXX1, P16402
6	GO:1903347	negative regulation of bicellular tight junction assembly	Biological Process	1	B3KRB7
6	GO:0006351	transcription, DNA-templated	Biological Process	14	B4E1V0, Q9BVP2, Q9BW34, B3KMT5, P31350, Q5T7U1, Q9Y6H1, Q53RD8, P16402, B4DTK6, A0A1B0GVI7, B3KRB7, P48506, F1JVV5
6	GO:0045217	cell-cell junction maintenance	Biological Process	1	Q9P1Y5
6	GO:0006266	DNA ligation	Biological Process	1	P11388
6	GO:1904152	regulation of retrograde protein transport, ER to cytosol	Biological Process	1	P60604
6	GO:0043623	cellular protein complex assembly	Biological Process	1	B2R4U3
6	GO:0034143	regulation of toll-like receptor 4 signaling pathway	Biological Process	1	B4E1V0
6	GO:0010559	regulation of glycoprotein biosynthetic process	Biological Process	1	Q15397
6	GO:0009108	coenzyme biosynthetic process	Biological Process	1	O00767
6	GO:0042552	myelination	Biological Process	1	B4DUP5
6	GO:2000278	regulation of DNA biosynthetic process	Biological Process	1	B2RA70
6	GO:0046503	glycerolipid catabolic process	Biological Process	1	A8MW49
6	GO:0050691	regulation of defense response to virus by host	Biological Process	1	A8MW49
6	GO:0071800	podosome assembly	Biological Process	1	B2RA70
6	GO:0006073	cellular glucan metabolic process	Biological Process	2	O60701, Q96RG4
6	GO:0050684	regulation of mRNA processing	Biological Process	2	Q12872, I3L1D4
6	GO:0065004	protein-DNA complex assembly	Biological Process	1	P16402
6	GO:0006396	RNA processing	Biological Process	27	Q9Y3U8, O95478, Q13895, C9K025, Q71UM5, Q6DKI1, Q9BWT3, P62081, Q9H9Y2, Q8TDD1, B2R823, P50914, A0A0A0MRW6, A0A087WXM6, P39023, I3L1D4, Q7Z6E9, S4R456, Q12872, M0R0F0, A0A024RDF4, Q8IY37, Q9NY93, Q9BVJ6, P62861, P63173, D3YTB1
6	GO:0052547	regulation of peptidase activity	Biological Process	3	A8MW49, Q71UM5, B2RA70
6	GO:0071281	cellular response to iron ion	Biological Process	1	H7C5E8
6	GO:0006733	oxidoreduction coenzyme metabolic process	Biological Process	1	B3KMT5
6	GO:0042278	purine nucleoside metabolic process	Biological Process	3	P09669, B3KMT5, A0A140VJE0
6	GO:0070555	response to interleukin-1	Biological Process	2	B3KRB7, B2RA70
6	GO:0044004	disruption by symbiont of host cell	Biological Process	1	F6KPG5
6	GO:0035456	response to interferon-beta	Biological Process	1	P60604
6	GO:0090002	establishment of protein localization to plasma membrane	Biological Process	1	B3KRB7
6	GO:1902679	negative regulation of RNA biosynthetic process	Biological Process	4	A0A1B0GVI7, Q53RD8, P48506, P16402
6	GO:0045870	positive regulation of single stranded viral RNA replication via double stranded DNA intermediate	Biological Process	1	P11388
6	GO:0050767	regulation of neurogenesis	Biological Process	1	B2RA70
6	GO:1902806	regulation of cell cycle G1/S phase transition	Biological Process	1	Q71UM5
6	GO:0043535	regulation of blood vessel endothelial cell migration	Biological Process	1	Q5T123
6	GO:0032944	regulation of mononuclear cell proliferation	Biological Process	1	A0A1B0GVI7
6	GO:0036295	cellular response to increased oxygen levels	Biological Process	1	B4DQK1
6	GO:0006163	purine nucleotide metabolic process	Biological Process	2	P09669, B3KMT5
6	GO:0006767	water-soluble vitamin metabolic process	Biological Process	1	P07477
6	GO:0006633	fatty acid biosynthetic process	Biological Process	1	O00767
6	GO:1903364	positive regulation of cellular protein catabolic process	Biological Process	1	B2R4U3
6	GO:0015908	fatty acid transport	Biological Process	1	Q96RG4
6	GO:0034614	cellular response to reactive oxygen species	Biological Process	1	A8MW49
6	GO:0043632	modification-dependent macromolecule catabolic process	Biological Process	5	P60604, G5E9A6, B2R4U3, Q53EY9, Q7Z6E9
6	GO:0006334	nucleosome assembly	Biological Process	1	P16402
6	GO:0071428	rRNA-containing ribonucleoprotein complex export from nucleus	Biological Process	1	S4R456
6	GO:0019318	hexose metabolic process	Biological Process	1	Q96RG4
6	GO:0044788	modulation by host of viral process	Biological Process	1	B4E1V0
6	GO:0009117	nucleotide metabolic process	Biological Process	4	O60701, P09669, B3KMT5, P31350
6	GO:0046394	carboxylic acid biosynthetic process	Biological Process	2	O00767, B4DE67
6	GO:0009132	nucleoside diphosphate metabolic process	Biological Process	1	B3KMT5
6	GO:0051346	negative regulation of hydrolase activity	Biological Process	5	A8MW49, B4E1V0, Q9P1Y5, B3KRB7, B2RA70
6	GO:0006812	cation transport	Biological Process	4	P09669, B4E1V0, H7C5E8, G3V1D1
6	GO:2001243	negative regulation of intrinsic apoptotic signaling pathway	Biological Process	1	B2RA70
6	GO:0019395	fatty acid oxidation	Biological Process	1	Q96RG4
6	GO:0007167	enzyme linked receptor protein signaling pathway	Biological Process	2	Q99988, B2RA70
6	GO:0019220	regulation of phosphate metabolic process	Biological Process	9	Q8N4P8, B4E1V0, Q9P1Y5, B3KMT5, B7Z8R6, Q9ULW0, B3KRB7, Q99988, B2RA70
6	GO:0030217	T cell differentiation	Biological Process	1	Q53RD8
6	GO:0034660	ncRNA metabolic process	Biological Process	21	Q9Y3U8, O95478, S4R456, Q13895, C9K025, M0R0F0, Q71UM5, Q6DKI1, P62081, Q8IY37, Q53RD8, Q9H9Y2, B2R823, Q9BVJ6, P62861, P63173, P50914, A0A0A0MRW6, A0A087WXM6, P39023, D3YTB1
6	GO:0000086	G2/M transition of mitotic cell cycle	Biological Process	1	Q9ULW0
6	GO:0043408	regulation of MAPK cascade	Biological Process	2	B7Z8R6, Q99988
6	GO:0006144	purine nucleobase metabolic process	Biological Process	1	A0A140VJE0
6	GO:0009250	glucan biosynthetic process	Biological Process	1	Q96RG4
6	GO:0006464	cellular protein modification process	Biological Process	24	Q9ULR3, G5E9A6, Q96RG4, B4E1V0, Q9BVP2, Q53EY9, P11388, B2R4U3, B4DMI9, A8K7A2, B4DQK1, Q9ULW0, B3KRB7, Q99988, Q7Z6E9, P60604, Q8N4P8, Q8TB52, Q4G148, B7Z8R6, Q5JXX1, P16402, B2RA70, Q15397
6	GO:0032640	tumor necrosis factor production	Biological Process	1	B4E1V0
6	GO:0071407	cellular response to organic cyclic compound	Biological Process	2	Q8TDD1, Q16678
6	GO:0045861	negative regulation of proteolysis	Biological Process	3	A8MW49, B2RA70, P01023
6	GO:0009062	fatty acid catabolic process	Biological Process	1	Q96RG4
6	GO:0033559	unsaturated fatty acid metabolic process	Biological Process	3	O00767, Q16678, A0A024R172
6	GO:0033085	negative regulation of T cell differentiation in thymus	Biological Process	1	Q53RD8
6	GO:0051349	positive regulation of lyase activity	Biological Process	1	G3V1D1
6	GO:0031400	negative regulation of protein modification process	Biological Process	4	Q8N4P8, B2R4U3, B7Z8R6, B3KRB7
6	GO:0003158	endothelium development	Biological Process	1	B3KRB7
6	GO:0006901	vesicle coating	Biological Process	1	B0AZV9
6	GO:0043010	camera-type eye development	Biological Process	1	Q16678
6	GO:0045727	positive regulation of translation	Biological Process	2	Q71UM5, A0A024RDF4
6	GO:0005978	glycogen biosynthetic process	Biological Process	1	Q96RG4
6	GO:0010498	proteasomal protein catabolic process	Biological Process	2	P60604, B2R4U3
6	GO:0007096	regulation of exit from mitosis	Biological Process	1	B2R4U3
6	GO:0010821	regulation of mitochondrion organization	Biological Process	1	B4DQK1
6	GO:2001237	negative regulation of extrinsic apoptotic signaling pathway	Biological Process	1	B2RA70
6	GO:0044042	glucan metabolic process	Biological Process	2	O60701, Q96RG4
6	GO:0034765	regulation of ion transmembrane transport	Biological Process	1	Q96RG4
6	GO:1903038	negative regulation of leukocyte cell-cell adhesion	Biological Process	1	Q53RD8
6	GO:0039703	RNA replication	Biological Process	1	P11388
6	GO:0001897	cytolysis by symbiont of host cells	Biological Process	1	F6KPG5
6	GO:0006414	translational elongation	Biological Process	3	M0R0F0, Q9BW34, Q6FHK1
6	GO:0006612	protein targeting to membrane	Biological Process	12	Q9Y3U8, S4R456, C9K025, M0R0F0, Q71UM5, P62081, P62861, P63173, P50914, A0A087WXM6, P39023, D3YTB1
6	GO:0010907	positive regulation of glucose metabolic process	Biological Process	1	Q96RG4
6	GO:0070646	protein modification by small protein removal	Biological Process	1	G5E9A6
6	GO:0046324	regulation of glucose import	Biological Process	1	Q96RG4
6	GO:0010803	regulation of tumor necrosis factor-mediated signaling pathway	Biological Process	1	B3KRB7
6	GO:0043401	steroid hormone mediated signaling pathway	Biological Process	1	Q8TDD1
6	GO:0046164	alcohol catabolic process	Biological Process	1	B4DE48
6	GO:0061041	regulation of wound healing	Biological Process	1	Q8IZZ8
6	GO:0051403	stress-activated MAPK cascade	Biological Process	2	B7Z8R6, B3KRB7
6	GO:0042100	B cell proliferation	Biological Process	1	A0A1B0GVI7
6	GO:0034308	primary alcohol metabolic process	Biological Process	1	Q16678
6	GO:2000112	regulation of cellular macromolecule biosynthetic process	Biological Process	26	Q96RG4, B4E1V0, Q71UM5, Q9BVP2, Q9BW34, P31350, Q53RD8, Q8TDD1, A0A1B0GVI7, B3KRB7, I3L1D4, P48506, F1JVV5, Q99988, Q7Z6E9, Q8N4P8, M0R0F0, B3KMT5, A0A024RDF4, Q9Y6H1, P16402, K7ER90, Q6IAM0, B4DUP5, B2RA70, Q15397
6	GO:0050880	regulation of blood vessel size	Biological Process	1	P48506
6	GO:0032680	regulation of tumor necrosis factor production	Biological Process	1	B4E1V0
6	GO:0051056	regulation of small GTPase mediated signal transduction	Biological Process	1	P01023
6	GO:0006110	regulation of glycolytic process	Biological Process	1	B3KMT5
6	GO:0034612	response to tumor necrosis factor	Biological Process	1	B3KRB7
6	GO:0000079	regulation of cyclin-dependent protein serine/threonine kinase activity	Biological Process	1	Q8N4P8
6	GO:0009913	epidermal cell differentiation	Biological Process	1	B1ALI9
6	GO:0033572	transferrin transport	Biological Process	1	H7C5E8
6	GO:0016197	endosomal transport	Biological Process	2	B4DE48, B2RA70
6	GO:1901653	cellular response to peptide	Biological Process	3	Q96RG4, P63218, B2RA70
6	GO:2000279	negative regulation of DNA biosynthetic process	Biological Process	1	B2RA70
6	GO:0046165	alcohol biosynthetic process	Biological Process	2	B3KRC6, Q15125
6	GO:0002526	acute inflammatory response	Biological Process	1	P01023
6	GO:0006364	rRNA processing	Biological Process	20	Q9Y3U8, O95478, S4R456, Q13895, C9K025, M0R0F0, Q71UM5, Q6DKI1, P62081, Q8IY37, Q9H9Y2, B2R823, Q9BVJ6, P62861, P63173, P50914, A0A0A0MRW6, A0A087WXM6, P39023, D3YTB1
6	GO:0050870	positive regulation of T cell activation	Biological Process	1	B2RA70
6	GO:0006639	acylglycerol metabolic process	Biological Process	1	A8MW49
6	GO:2001251	negative regulation of chromosome organization	Biological Process	1	B2RA70
6	GO:0042158	lipoprotein biosynthetic process	Biological Process	1	B4DQK1
6	GO:0006706	steroid catabolic process	Biological Process	1	B4DE48
6	GO:0045936	negative regulation of phosphate metabolic process	Biological Process	3	Q9P1Y5, B7Z8R6, B3KRB7
6	GO:1903825	organic acid transmembrane transport	Biological Process	1	Q96RG4
6	GO:0030855	epithelial cell differentiation	Biological Process	2	B1ALI9, B3KRB7
6	GO:0006694	steroid biosynthetic process	Biological Process	3	B4DE67, B3KRC6, Q15125
6	GO:0048207	vesicle targeting, rough ER to cis-Golgi	Biological Process	1	B0AZV9
6	GO:0045071	negative regulation of viral genome replication	Biological Process	1	B4E1V0
6	GO:0033157	regulation of intracellular protein transport	Biological Process	1	P60604
6	GO:1903311	regulation of mRNA metabolic process	Biological Process	2	Q12872, I3L1D4
6	GO:0043484	regulation of RNA splicing	Biological Process	2	Q12872, I3L1D4
6	GO:0018146	keratan sulfate biosynthetic process	Biological Process	1	B3KM35
6	GO:0043491	protein kinase B signaling	Biological Process	1	B2RA70
6	GO:0048625	myoblast fate commitment	Biological Process	1	O00458
6	GO:1901990	regulation of mitotic cell cycle phase transition	Biological Process	2	Q71UM5, B2R4U3
6	GO:1902807	negative regulation of cell cycle G1/S phase transition	Biological Process	1	Q71UM5
6	GO:0009141	nucleoside triphosphate metabolic process	Biological Process	2	P09669, B3KMT5
6	GO:0006873	cellular ion homeostasis	Biological Process	4	B4E1V0, B7Z8Q4, H7C5E8, G3V1D1
6	GO:0034220	ion transmembrane transport	Biological Process	1	Q96RG4
6	GO:0071346	cellular response to interferon-gamma	Biological Process	1	A8YQF4
6	GO:0071375	cellular response to peptide hormone stimulus	Biological Process	3	Q96RG4, P63218, B2RA70
6	GO:1902680	positive regulation of RNA biosynthetic process	Biological Process	7	A0A1B0GVI7, Q9BVP2, B3KMT5, Q9Y6H1, B3KRB7, Q53RD8, F1JVV5
6	GO:1901879	regulation of protein depolymerization	Biological Process	1	Q5T123
6	GO:0002221	pattern recognition receptor signaling pathway	Biological Process	2	B4E1V0, B3KRB7
6	GO:0006029	proteoglycan metabolic process	Biological Process	1	Q4G148
6	GO:0044774	mitotic DNA integrity checkpoint	Biological Process	1	Q71UM5
6	GO:0072673	lamellipodium morphogenesis	Biological Process	1	B2RA70
6	GO:0071897	DNA biosynthetic process	Biological Process	1	B2RA70
6	GO:0016571	histone methylation	Biological Process	1	P16402
6	GO:0018022	peptidyl-lysine methylation	Biological Process	1	P16402
6	GO:0032210	regulation of telomere maintenance via telomerase	Biological Process	1	B2RA70
6	GO:0030206	chondroitin sulfate biosynthetic process	Biological Process	1	Q4G148
6	GO:0050670	regulation of lymphocyte proliferation	Biological Process	1	A0A1B0GVI7
6	GO:0050863	regulation of T cell activation	Biological Process	2	Q53RD8, B2RA70
6	GO:0051783	regulation of nuclear division	Biological Process	2	A8K4B4, B2R4U3
6	GO:0007249	I-kappaB kinase/NF-kappaB signaling	Biological Process	3	B4E1V0, Q9BW34, B3KRB7
6	GO:0014066	regulation of phosphatidylinositol 3-kinase signaling	Biological Process	2	Q96RG4, B2RA70
6	GO:0050830	defense response to Gram-positive bacterium	Biological Process	1	P62861
6	GO:0097193	intrinsic apoptotic signaling pathway	Biological Process	2	Q71UM5, B2RA70
6	GO:0006897	endocytosis	Biological Process	5	B7Z8Q4, B7Z8R6, H7C5E8, F6KPG5, B2RA70
6	GO:0060393	regulation of pathway-restricted SMAD protein phosphorylation	Biological Process	1	Q99988
6	GO:0001868	regulation of complement activation, lectin pathway	Biological Process	1	P01023
6	GO:0016127	sterol catabolic process	Biological Process	1	B4DE48
6	GO:0006401	RNA catabolic process	Biological Process	12	Q9Y3U8, S4R456, C9K025, M0R0F0, Q71UM5, P62081, P62861, P63173, P50914, A0A087WXM6, P39023, D3YTB1
6	GO:0045937	positive regulation of phosphate metabolic process	Biological Process	4	B4E1V0, Q9ULW0, Q99988, B2RA70
6	GO:0018279	protein N-linked glycosylation via asparagine	Biological Process	1	P60604
6	GO:0019836	hemolysis by symbiont of host erythrocytes	Biological Process	1	F6KPG5
6	GO:2001242	regulation of intrinsic apoptotic signaling pathway	Biological Process	1	B2RA70
6	GO:0048709	oligodendrocyte differentiation	Biological Process	1	B4DUP5
6	GO:0043087	regulation of GTPase activity	Biological Process	4	B4DUP5, Q96RG4, Q5T123, Q96HP0
6	GO:0006275	regulation of DNA replication	Biological Process	2	Q8N4P8, Q7Z6E9
6	GO:0043043	peptide biosynthetic process	Biological Process	22	Q9Y3U8, S4R456, C9K025, M0R0F0, Q71UM5, Q9BW34, Q6DKI1, A0A024RDF4, P62081, B3KS36, P62861, K7ER90, Q6IAM0, P63173, P50914, B4DUP5, A0A087WXM6, P39023, D3YTB1, P48506, Q6FHK1, Q15397
6	GO:0051495	positive regulation of cytoskeleton organization	Biological Process	1	B2RA70
6	GO:0045619	regulation of lymphocyte differentiation	Biological Process	1	Q53RD8
6	GO:2000191	regulation of fatty acid transport	Biological Process	1	Q96RG4
6	GO:0043631	RNA polyadenylation	Biological Process	1	Q9BWT3
6	GO:2001141	regulation of RNA biosynthetic process	Biological Process	11	A0A1B0GVI7, B4E1V0, Q9BVP2, B3KMT5, P31350, Q9Y6H1, Q53RD8, B3KRB7, P48506, F1JVV5, P16402
6	GO:1904892	regulation of STAT cascade	Biological Process	1	B3KRB7
6	GO:0036294	cellular response to decreased oxygen levels	Biological Process	2	A8MW49, Q9Y6H1
6	GO:0006011	UDP-glucose metabolic process	Biological Process	1	O60701
6	GO:0042398	cellular modified amino acid biosynthetic process	Biological Process	1	P48506
6	GO:0002673	regulation of acute inflammatory response	Biological Process	1	P01023
6	GO:0030038	contractile actin filament bundle assembly	Biological Process	1	B2RA70
6	GO:0016485	protein processing	Biological Process	3	P07477, Q92876, P01023
6	GO:0072659	protein localization to plasma membrane	Biological Process	1	B3KRB7
6	GO:0043123	positive regulation of I-kappaB kinase/NF-kappaB signaling	Biological Process	3	B4E1V0, Q9BW34, B3KRB7
6	GO:0009124	nucleoside monophosphate biosynthetic process	Biological Process	1	A0A140VJE0
6	GO:0002753	cytoplasmic pattern recognition receptor signaling pathway	Biological Process	1	B3KRB7
6	GO:0008203	cholesterol metabolic process	Biological Process	3	B3KRC6, B4DE48, Q15125
6	GO:0072522	purine-containing compound biosynthetic process	Biological Process	1	A0A140VJE0
6	GO:0045620	negative regulation of lymphocyte differentiation	Biological Process	1	Q53RD8
6	GO:0010631	epithelial cell migration	Biological Process	3	Q5T123, P07477, B2RA70
6	GO:1902001	fatty acid transmembrane transport	Biological Process	1	Q96RG4
6	GO:0090114	COPII-coated vesicle budding	Biological Process	1	B0AZV9
6	GO:0006605	protein targeting	Biological Process	12	Q9Y3U8, S4R456, C9K025, M0R0F0, Q71UM5, P62081, P62861, P63173, P50914, A0A087WXM6, P39023, D3YTB1
6	GO:0044070	regulation of anion transport	Biological Process	1	Q96RG4
6	GO:0032963	collagen metabolic process	Biological Process	1	P07477
6	GO:0007229	integrin-mediated signaling pathway	Biological Process	1	B2RA70
6	GO:0070199	establishment of protein localization to chromosome	Biological Process	1	P16402
6	GO:0006417	regulation of translation	Biological Process	8	K7ER90, Q6IAM0, M0R0F0, B4DUP5, Q9BW34, Q71UM5, A0A024RDF4, Q15397
6	GO:1904153	negative regulation of retrograde protein transport, ER to cytosol	Biological Process	1	P60604
6	GO:0030216	keratinocyte differentiation	Biological Process	1	B1ALI9
6	GO:0034728	nucleosome organization	Biological Process	1	P16402
6	GO:0009123	nucleoside monophosphate metabolic process	Biological Process	3	P09669, B3KMT5, A0A140VJE0
6	GO:0008630	intrinsic apoptotic signaling pathway in response to DNA damage	Biological Process	1	Q71UM5
6	GO:0045069	regulation of viral genome replication	Biological Process	2	B4E1V0, P11388
6	GO:0008206	bile acid metabolic process	Biological Process	1	B4DE67
6	GO:1904232	regulation of aconitate hydratase activity	Biological Process	1	G3V1D1
6	GO:0015931	nucleobase-containing compound transport	Biological Process	1	A0A024RDF4
6	GO:0006820	anion transport	Biological Process	3	Q6N075, Q96RG4, F6KPG5
6	GO:0006026	aminoglycan catabolic process	Biological Process	1	O75487
6	GO:0006750	glutathione biosynthetic process	Biological Process	1	P48506
6	GO:0032460	negative regulation of protein oligomerization	Biological Process	1	B2RA70
6	GO:0035337	fatty-acyl-CoA metabolic process	Biological Process	1	O00767
6	GO:0030203	glycosaminoglycan metabolic process	Biological Process	5	O60701, B3KM35, Q4G148, O75487, Q5T985
6	GO:0000054	ribosomal subunit export from nucleus	Biological Process	1	S4R456
6	GO:0046395	carboxylic acid catabolic process	Biological Process	1	Q96RG4
6	GO:0071479	cellular response to ionizing radiation	Biological Process	1	Q9BW34
6	GO:0033762	response to glucagon	Biological Process	1	P63218
6	GO:0009064	glutamine family amino acid metabolic process	Biological Process	1	P48506
6	GO:0009259	ribonucleotide metabolic process	Biological Process	2	P09669, B3KMT5
6	GO:2001286	regulation of caveolin-mediated endocytosis	Biological Process	1	B2RA70
6	GO:0044257	cellular protein catabolic process	Biological Process	5	P60604, G5E9A6, B2R4U3, Q53EY9, Q7Z6E9
6	GO:0031663	lipopolysaccharide-mediated signaling pathway	Biological Process	1	B4E1V0
6	GO:0008156	negative regulation of DNA replication	Biological Process	1	Q8N4P8
6	GO:0032091	negative regulation of protein binding	Biological Process	1	Q8N4P8
6	GO:0030865	cortical cytoskeleton organization	Biological Process	1	B3KRB7
6	GO:0070873	regulation of glycogen metabolic process	Biological Process	1	Q96RG4
6	GO:0043549	regulation of kinase activity	Biological Process	4	Q8N4P8, B4E1V0, Q9ULW0, B2RA70
6	GO:0006096	glycolytic process	Biological Process	1	B3KMT5
6	GO:1903318	negative regulation of protein maturation	Biological Process	1	P01023
6	GO:0051436	negative regulation of ubiquitin-protein ligase activity involved in mitotic cell cycle	Biological Process	1	B2R4U3
6	GO:0001869	negative regulation of complement activation, lectin pathway	Biological Process	1	P01023
6	GO:0009226	nucleotide-sugar biosynthetic process	Biological Process	1	O60701
6	GO:0007043	cell-cell junction assembly	Biological Process	1	B3KRB7
6	GO:2000392	regulation of lamellipodium morphogenesis	Biological Process	1	B2RA70
6	GO:0031032	actomyosin structure organization	Biological Process	1	B2RA70
6	GO:0048762	mesenchymal cell differentiation	Biological Process	1	I3L2L5
6	GO:0051438	regulation of ubiquitin-protein transferase activity	Biological Process	1	B2R4U3
6	GO:0030162	regulation of proteolysis	Biological Process	6	A8MW49, Q71UM5, B2R4U3, Q8IZZ8, B2RA70, P01023
6	GO:0050864	regulation of B cell activation	Biological Process	1	A0A1B0GVI7
6	GO:0002521	leukocyte differentiation	Biological Process	2	Q53RD8, B2RA70
6	GO:1903317	regulation of protein maturation	Biological Process	1	P01023
6	GO:0046321	positive regulation of fatty acid oxidation	Biological Process	1	Q96RG4
7	GO:0043161	proteasome-mediated ubiquitin-dependent protein catabolic process	Biological Process	2	P60604, B2R4U3
7	GO:0051260	protein homooligomerization	Biological Process	1	B2RA70
7	GO:0002223	stimulatory C-type lectin receptor signaling pathway	Biological Process	1	B3KRB7
7	GO:0006323	DNA packaging	Biological Process	3	A8K4B4, P16402, P11388
7	GO:0006636	unsaturated fatty acid biosynthetic process	Biological Process	1	O00767
7	GO:0043666	regulation of phosphoprotein phosphatase activity	Biological Process	1	B3KRB7
7	GO:0043154	negative regulation of cysteine-type endopeptidase activity involved in apoptotic process	Biological Process	2	A8MW49, B2RA70
7	GO:0043543	protein acylation	Biological Process	1	Q5JXX1
7	GO:0060337	type I interferon signaling pathway	Biological Process	1	A8YQF4
7	GO:0042775	mitochondrial ATP synthesis coupled electron transport	Biological Process	1	P09669
7	GO:0034470	ncRNA processing	Biological Process	20	Q9Y3U8, O95478, S4R456, Q13895, C9K025, M0R0F0, Q71UM5, Q6DKI1, P62081, Q8IY37, Q9H9Y2, B2R823, Q9BVJ6, P62861, P63173, P50914, A0A0A0MRW6, A0A087WXM6, P39023, D3YTB1
7	GO:0000122	negative regulation of transcription from RNA polymerase II promoter	Biological Process	1	P16402
7	GO:0006448	regulation of translational elongation	Biological Process	2	M0R0F0, Q9BW34
7	GO:0072329	monocarboxylic acid catabolic process	Biological Process	1	Q96RG4
7	GO:0007254	JNK cascade	Biological Process	1	B7Z8R6
7	GO:0042326	negative regulation of phosphorylation	Biological Process	1	B7Z8R6
7	GO:0031062	positive regulation of histone methylation	Biological Process	1	P16402
7	GO:1903959	regulation of anion transmembrane transport	Biological Process	1	Q96RG4
7	GO:0045218	zonula adherens maintenance	Biological Process	1	Q9P1Y5
7	GO:2000108	positive regulation of leukocyte apoptotic process	Biological Process	1	Q53RD8
7	GO:0055080	cation homeostasis	Biological Process	4	B4E1V0, B7Z8Q4, H7C5E8, G3V1D1
7	GO:0032869	cellular response to insulin stimulus	Biological Process	1	Q96RG4
7	GO:0007259	JAK-STAT cascade	Biological Process	1	B3KRB7
7	GO:0008645	hexose transport	Biological Process	1	Q96RG4
7	GO:0006006	glucose metabolic process	Biological Process	1	Q96RG4
7	GO:0098659	inorganic cation import into cell	Biological Process	1	H7C5E8
7	GO:1903507	negative regulation of nucleic acid-templated transcription	Biological Process	4	A0A1B0GVI7, Q53RD8, P48506, P16402
7	GO:0033209	tumor necrosis factor-mediated signaling pathway	Biological Process	1	B3KRB7
7	GO:0048015	phosphatidylinositol-mediated signaling	Biological Process	2	Q96RG4, B2RA70
7	GO:0009135	purine nucleoside diphosphate metabolic process	Biological Process	1	B3KMT5
7	GO:0001933	negative regulation of protein phosphorylation	Biological Process	1	B7Z8R6
7	GO:0009161	ribonucleoside monophosphate metabolic process	Biological Process	3	P09669, B3KMT5, A0A140VJE0
7	GO:0042771	intrinsic apoptotic signaling pathway in response to DNA damage by p53 class mediator	Biological Process	1	Q71UM5
7	GO:0032463	negative regulation of protein homooligomerization	Biological Process	1	B2RA70
7	GO:1903578	regulation of ATP metabolic process	Biological Process	1	B3KMT5
7	GO:0006534	cysteine metabolic process	Biological Process	1	P48506
7	GO:0015909	long-chain fatty acid transport	Biological Process	1	Q96RG4
7	GO:0015672	monovalent inorganic cation transport	Biological Process	1	P09669
7	GO:0001932	regulation of protein phosphorylation	Biological Process	6	Q8N4P8, B4E1V0, B7Z8R6, Q9ULW0, Q99988, B2RA70
7	GO:0070125	mitochondrial translational elongation	Biological Process	1	Q6FHK1
7	GO:0046939	nucleotide phosphorylation	Biological Process	1	B3KMT5
7	GO:0061028	establishment of endothelial barrier	Biological Process	1	B3KRB7
7	GO:0006278	RNA-dependent DNA biosynthetic process	Biological Process	1	B2RA70
7	GO:0045945	positive regulation of transcription from RNA polymerase III promoter	Biological Process	1	Q53RD8
7	GO:0016570	histone modification	Biological Process	2	Q5JXX1, P16402
7	GO:0001934	positive regulation of protein phosphorylation	Biological Process	4	B4E1V0, Q9ULW0, B2RA70, Q99988
7	GO:0045446	endothelial cell differentiation	Biological Process	1	B3KRB7
7	GO:0009126	purine nucleoside monophosphate metabolic process	Biological Process	2	P09669, B3KMT5
7	GO:1903322	positive regulation of protein modification by small protein conjugation or removal	Biological Process	2	Q9BVP2, B2R4U3
7	GO:0033674	positive regulation of kinase activity	Biological Process	3	B4E1V0, Q9ULW0, B2RA70
7	GO:0051168	nuclear export	Biological Process	1	S4R456
7	GO:0002230	positive regulation of defense response to virus by host	Biological Process	1	A8MW49
7	GO:0015698	inorganic anion transport	Biological Process	1	Q6N075
7	GO:0030888	regulation of B cell proliferation	Biological Process	1	A0A1B0GVI7
7	GO:0010955	negative regulation of protein processing	Biological Process	1	P01023
7	GO:0002576	platelet degranulation	Biological Process	3	H7C5E8, F6KPG5, P01023
7	GO:0009144	purine nucleoside triphosphate metabolic process	Biological Process	2	P09669, B3KMT5
7	GO:1903050	regulation of proteolysis involved in cellular protein catabolic process	Biological Process	1	B2R4U3
7	GO:0033342	negative regulation of collagen binding	Biological Process	1	Q8N4P8
7	GO:0043624	cellular protein complex disassembly	Biological Process	2	Q5T123, Q6FHK1
7	GO:0032787	monocarboxylic acid metabolic process	Biological Process	7	O00767, Q96RG4, Q16678, B3KMT5, B4DE67, B3KRC6, A0A024R172
7	GO:0000056	ribosomal small subunit export from nucleus	Biological Process	1	S4R456
7	GO:0043648	dicarboxylic acid metabolic process	Biological Process	1	P48506
7	GO:0032873	negative regulation of stress-activated MAPK cascade	Biological Process	1	B7Z8R6
7	GO:0044783	G1 DNA damage checkpoint	Biological Process	1	Q71UM5
7	GO:0006383	transcription from RNA polymerase III promoter	Biological Process	1	Q53RD8
7	GO:2000134	negative regulation of G1/S transition of mitotic cell cycle	Biological Process	1	Q71UM5
7	GO:0009199	ribonucleoside triphosphate metabolic process	Biological Process	2	P09669, B3KMT5
7	GO:0043252	sodium-independent organic anion transport	Biological Process	1	F6KPG5
7	GO:0030263	apoptotic chromosome condensation	Biological Process	1	P11388
7	GO:0060333	interferon-gamma-mediated signaling pathway	Biological Process	1	A8YQF4
7	GO:2000811	negative regulation of anoikis	Biological Process	1	B2RA70
7	GO:0006359	regulation of transcription from RNA polymerase III promoter	Biological Process	1	Q53RD8
7	GO:0046328	regulation of JNK cascade	Biological Process	1	B7Z8R6
7	GO:0043280	positive regulation of cysteine-type endopeptidase activity involved in apoptotic process	Biological Process	1	Q71UM5
7	GO:0051437	positive regulation of ubiquitin-protein ligase activity involved in regulation of mitotic cell cycle transition	Biological Process	1	B2R4U3
7	GO:0030001	metal ion transport	Biological Process	3	B4E1V0, H7C5E8, G3V1D1
7	GO:0072512	trivalent inorganic cation transport	Biological Process	1	H7C5E8
7	GO:0006065	UDP-glucuronate biosynthetic process	Biological Process	1	O60701
7	GO:0042327	positive regulation of phosphorylation	Biological Process	4	B4E1V0, Q9ULW0, Q99988, B2RA70
7	GO:0006402	mRNA catabolic process	Biological Process	12	Q9Y3U8, S4R456, C9K025, M0R0F0, Q71UM5, P62081, P62861, P63173, P50914, A0A087WXM6, P39023, D3YTB1
7	GO:0098781	ncRNA transcription	Biological Process	1	Q53RD8
7	GO:0016101	diterpenoid metabolic process	Biological Process	2	Q16678, O75487
7	GO:1903320	regulation of protein modification by small protein conjugation or removal	Biological Process	4	Q8N4P8, Q9BVP2, B2R4U3, B4DQK1
7	GO:0070830	bicellular tight junction assembly	Biological Process	1	B3KRB7
7	GO:1903052	positive regulation of proteolysis involved in cellular protein catabolic process	Biological Process	1	B2R4U3
7	GO:0019369	arachidonic acid metabolic process	Biological Process	1	Q16678
7	GO:0002479	antigen processing and presentation of exogenous peptide antigen via MHC class I, TAP-dependent	Biological Process	1	A8YQF4
7	GO:0031638	zymogen activation	Biological Process	1	P07477
7	GO:0098771	inorganic ion homeostasis	Biological Process	4	B4E1V0, B7Z8Q4, H7C5E8, G3V1D1
7	GO:0070498	interleukin-1-mediated signaling pathway	Biological Process	1	B3KRB7
7	GO:0072330	monocarboxylic acid biosynthetic process	Biological Process	2	O00767, B4DE67
7	GO:0098656	anion transmembrane transport	Biological Process	1	Q96RG4
7	GO:0046425	regulation of JAK-STAT cascade	Biological Process	1	B3KRB7
7	GO:0006707	cholesterol catabolic process	Biological Process	1	B4DE48
7	GO:0070972	protein localization to endoplasmic reticulum	Biological Process	12	Q9Y3U8, S4R456, C9K025, M0R0F0, Q71UM5, P62081, P62861, P63173, P50914, A0A087WXM6, P39023, D3YTB1
7	GO:2000106	regulation of leukocyte apoptotic process	Biological Process	1	Q53RD8
7	GO:0002224	toll-like receptor signaling pathway	Biological Process	2	B4E1V0, B3KRB7
7	GO:0070126	mitochondrial translational termination	Biological Process	1	Q6FHK1
7	GO:0042451	purine nucleoside biosynthetic process	Biological Process	1	A0A140VJE0
7	GO:0046464	acylglycerol catabolic process	Biological Process	1	A8MW49
7	GO:1903508	positive regulation of nucleic acid-templated transcription	Biological Process	7	A0A1B0GVI7, Q9BVP2, B3KMT5, Q9Y6H1, B3KRB7, Q53RD8, F1JVV5
7	GO:0010923	negative regulation of phosphatase activity	Biological Process	2	Q9P1Y5, B3KRB7
7	GO:0010952	positive regulation of peptidase activity	Biological Process	1	Q71UM5
7	GO:0070423	nucleotide-binding oligomerization domain containing signaling pathway	Biological Process	1	B3KRB7
7	GO:2000209	regulation of anoikis	Biological Process	1	B2RA70
7	GO:0097659	nucleic acid-templated transcription	Biological Process	14	B4E1V0, Q9BVP2, Q9BW34, B3KMT5, P31350, Q5T7U1, Q9Y6H1, Q53RD8, P16402, B4DTK6, A0A1B0GVI7, B3KRB7, P48506, F1JVV5
7	GO:0035458	cellular response to interferon-beta	Biological Process	1	P60604
7	GO:0050852	T cell receptor signaling pathway	Biological Process	1	B3KRB7
7	GO:0006024	glycosaminoglycan biosynthetic process	Biological Process	4	O60701, B3KM35, Q4G148, O75487
7	GO:0046942	carboxylic acid transport	Biological Process	2	Q96RG4, F6KPG5
7	GO:0072511	divalent inorganic cation transport	Biological Process	1	H7C5E8
7	GO:0006166	purine ribonucleoside salvage	Biological Process	1	A0A140VJE0
7	GO:0042455	ribonucleoside biosynthetic process	Biological Process	1	A0A140VJE0
7	GO:1902653	secondary alcohol biosynthetic process	Biological Process	2	B3KRC6, Q15125
7	GO:0006165	nucleoside diphosphate phosphorylation	Biological Process	1	B3KMT5
7	GO:0042063	gliogenesis	Biological Process	1	B4DUP5
7	GO:0046320	regulation of fatty acid oxidation	Biological Process	1	Q96RG4
7	GO:0006366	transcription from RNA polymerase II promoter	Biological Process	8	A0A1B0GVI7, Q9BVP2, B3KMT5, Q9Y6H1, Q53RD8, B3KRB7, F1JVV5, P16402
7	GO:0009299	mRNA transcription	Biological Process	1	Q9BW34
7	GO:1903140	regulation of establishment of endothelial barrier	Biological Process	1	B3KRB7
7	GO:0008380	RNA splicing	Biological Process	2	Q12872, I3L1D4
7	GO:0019184	nonribosomal peptide biosynthetic process	Biological Process	1	P48506
7	GO:0070861	regulation of protein exit from endoplasmic reticulum	Biological Process	1	P60604
7	GO:1905039	carboxylic acid transmembrane transport	Biological Process	1	Q96RG4
7	GO:0031060	regulation of histone methylation	Biological Process	1	P16402
7	GO:0035336	long-chain fatty-acyl-CoA metabolic process	Biological Process	1	O00767
7	GO:0043547	positive regulation of GTPase activity	Biological Process	1	Q5T123
7	GO:0043297	apical junction assembly	Biological Process	1	B3KRB7
7	GO:0007169	transmembrane receptor protein tyrosine kinase signaling pathway	Biological Process	1	B2RA70
7	GO:0051258	protein polymerization	Biological Process	1	B2R4U3
7	GO:0038093	Fc receptor signaling pathway	Biological Process	2	B3KRB7, B2RA70
7	GO:0035304	regulation of protein dephosphorylation	Biological Process	1	B3KRB7
7	GO:0016579	protein deubiquitination	Biological Process	1	G5E9A6
7	GO:0006536	glutamate metabolic process	Biological Process	1	P48506
7	GO:0031571	mitotic G1 DNA damage checkpoint	Biological Process	1	Q71UM5
7	GO:0072584	caveolin-mediated endocytosis	Biological Process	1	B2RA70
7	GO:0046949	fatty-acyl-CoA biosynthetic process	Biological Process	1	O00767
7	GO:0006898	receptor-mediated endocytosis	Biological Process	4	B7Z8Q4, H7C5E8, B7Z8R6, F6KPG5
7	GO:0007601	visual perception	Biological Process	1	Q16678
7	GO:0010466	negative regulation of peptidase activity	Biological Process	2	A8MW49, B2RA70
7	GO:0001837	epithelial to mesenchymal transition	Biological Process	1	I3L2L5
7	GO:0016073	snRNA metabolic process	Biological Process	1	Q53RD8
7	GO:0006497	protein lipidation	Biological Process	1	B4DQK1
7	GO:0034968	histone lysine methylation	Biological Process	1	P16402
7	GO:1904666	regulation of ubiquitin protein ligase activity	Biological Process	1	B2R4U3
7	GO:0006360	transcription from RNA polymerase I promoter	Biological Process	1	B4DTK6
7	GO:0071169	establishment of protein localization to chromatin	Biological Process	1	P16402
7	GO:0070613	regulation of protein processing	Biological Process	1	P01023
7	GO:0006635	fatty acid beta-oxidation	Biological Process	1	Q96RG4
7	GO:0035303	regulation of dephosphorylation	Biological Process	2	Q9P1Y5, B3KRB7
7	GO:0016072	rRNA metabolic process	Biological Process	20	Q9Y3U8, O95478, S4R456, Q13895, C9K025, M0R0F0, Q71UM5, Q6DKI1, P62081, Q8IY37, Q9H9Y2, B2R823, Q9BVJ6, P62861, P63173, P50914, A0A0A0MRW6, A0A087WXM6, P39023, D3YTB1
7	GO:0006690	icosanoid metabolic process	Biological Process	2	Q16678, A0A024R172
7	GO:0071356	cellular response to tumor necrosis factor	Biological Process	1	B3KRB7
7	GO:0043281	regulation of cysteine-type endopeptidase activity involved in apoptotic process	Biological Process	3	A8MW49, Q71UM5, B2RA70
7	GO:0051443	positive regulation of ubiquitin-protein transferase activity	Biological Process	1	B2R4U3
7	GO:0006613	cotranslational protein targeting to membrane	Biological Process	12	Q9Y3U8, S4R456, C9K025, M0R0F0, Q71UM5, P62081, P62861, P63173, P50914, A0A087WXM6, P39023, D3YTB1
7	GO:0010833	telomere maintenance via telomere lengthening	Biological Process	1	B2RA70
7	GO:0045580	regulation of T cell differentiation	Biological Process	1	Q53RD8
7	GO:0030520	intracellular estrogen receptor signaling pathway	Biological Process	1	Q8TDD1
7	GO:1903506	regulation of nucleic acid-templated transcription	Biological Process	11	A0A1B0GVI7, B4E1V0, Q9BVP2, B3KMT5, P31350, Q9Y6H1, Q53RD8, B3KRB7, P48506, F1JVV5, P16402
7	GO:0006352	DNA-templated transcription, initiation	Biological Process	1	B4DTK6
7	GO:0009185	ribonucleoside diphosphate metabolic process	Biological Process	1	B3KMT5
7	GO:0005979	regulation of glycogen biosynthetic process	Biological Process	1	Q96RG4
7	GO:0045581	negative regulation of T cell differentiation	Biological Process	1	Q53RD8
7	GO:0034502	protein localization to chromosome	Biological Process	2	Q9BVP2, P16402
7	GO:0018193	peptidyl-amino acid modification	Biological Process	8	P60604, Q9BVP2, A8K7A2, B3KRB7, Q5JXX1, P11388, P16402, B2RA70
7	GO:0006468	protein phosphorylation	Biological Process	8	Q96RG4, Q8N4P8, B4E1V0, B7Z8R6, Q9ULW0, B3KRB7, Q99988, B2RA70
7	GO:0045859	regulation of protein kinase activity	Biological Process	4	Q8N4P8, B4E1V0, Q9ULW0, B2RA70
7	GO:1900542	regulation of purine nucleotide metabolic process	Biological Process	1	B3KMT5
7	GO:0006470	protein dephosphorylation	Biological Process	3	Q9ULR3, B4DMI9, B3KRB7
7	GO:0046496	nicotinamide nucleotide metabolic process	Biological Process	1	B3KMT5
7	GO:0006415	translational termination	Biological Process	1	Q6FHK1
7	GO:0031123	RNA 3'-end processing	Biological Process	1	Q9BWT3
7	GO:0006641	triglyceride metabolic process	Biological Process	1	A8MW49
7	GO:0048024	regulation of mRNA splicing, via spliceosome	Biological Process	2	Q12872, I3L1D4
7	GO:0006357	regulation of transcription from RNA polymerase II promoter	Biological Process	7	A0A1B0GVI7, Q9BVP2, B3KMT5, Q9Y6H1, B3KRB7, F1JVV5, P16402
7	GO:1903510	mucopolysaccharide metabolic process	Biological Process	3	B3KM35, Q4G148, Q5T985
7	GO:0035305	negative regulation of dephosphorylation	Biological Process	2	Q9P1Y5, B3KRB7
7	GO:0030003	cellular cation homeostasis	Biological Process	4	B4E1V0, B7Z8Q4, H7C5E8, G3V1D1
7	GO:0005982	starch metabolic process	Biological Process	1	O60701
7	GO:0043276	anoikis	Biological Process	1	B2RA70
7	GO:0071593	lymphocyte aggregation	Biological Process	3	Q53RD8, B2RA70, Q96HP0
7	GO:0071377	cellular response to glucagon stimulus	Biological Process	1	P63218
7	GO:0051444	negative regulation of ubiquitin-protein transferase activity	Biological Process	1	B2R4U3
7	GO:0048699	generation of neurons	Biological Process	5	Q9P1Y5, B7Z8R6, B2RA70, F1JVV5, Q96HP0
7	GO:1903321	negative regulation of protein modification by small protein conjugation or removal	Biological Process	2	Q8N4P8, B2R4U3
7	GO:0030166	proteoglycan biosynthetic process	Biological Process	1	Q4G148
7	GO:0043542	endothelial cell migration	Biological Process	2	Q5T123, P07477
7	GO:0019941	modification-dependent protein catabolic process	Biological Process	5	P60604, G5E9A6, B2R4U3, Q53EY9, Q7Z6E9
7	GO:0043149	stress fiber assembly	Biological Process	1	B2RA70
7	GO:0008213	protein alkylation	Biological Process	1	P16402
7	GO:0071347	cellular response to interleukin-1	Biological Process	1	B3KRB7
7	GO:0007178	transmembrane receptor protein serine/threonine kinase signaling pathway	Biological Process	2	Q99988, B2RA70
7	GO:0046128	purine ribonucleoside metabolic process	Biological Process	3	P09669, B3KMT5, A0A140VJE0
7	GO:0051974	negative regulation of telomerase activity	Biological Process	1	B2RA70
7	GO:1904234	positive regulation of aconitate hydratase activity	Biological Process	1	G3V1D1
7	GO:0015911	plasma membrane long-chain fatty acid transport	Biological Process	1	Q96RG4
7	GO:0006027	glycosaminoglycan catabolic process	Biological Process	1	O75487
7	GO:0006397	mRNA processing	Biological Process	4	Q12872, Q9BWT3, I3L1D4, Q7Z6E9
7	GO:2000045	regulation of G1/S transition of mitotic cell cycle	Biological Process	1	Q71UM5
7	GO:0002480	antigen processing and presentation of exogenous peptide antigen via MHC class I, TAP-independent	Biological Process	1	A8YQF4
7	GO:0050657	nucleic acid transport	Biological Process	1	A0A024RDF4
7	GO:0072332	intrinsic apoptotic signaling pathway by p53 class mediator	Biological Process	1	Q71UM5
7	GO:0071887	leukocyte apoptotic process	Biological Process	1	Q53RD8
7	GO:0052548	regulation of endopeptidase activity	Biological Process	3	A8MW49, Q71UM5, B2RA70
7	GO:0070647	protein modification by small protein conjugation or removal	Biological Process	11	P60604, G5E9A6, Q8N4P8, Q9BVP2, B2R4U3, Q8TB52, A8K7A2, B4DQK1, Q53EY9, P11388, Q7Z6E9
7	GO:0009150	purine ribonucleotide metabolic process	Biological Process	2	P09669, B3KMT5
7	GO:0035308	negative regulation of protein dephosphorylation	Biological Process	1	B3KRB7
7	GO:0006695	cholesterol biosynthetic process	Biological Process	2	B3KRC6, Q15125
7	GO:0030834	regulation of actin filament depolymerization	Biological Process	1	Q5T123
7	GO:0009156	ribonucleoside monophosphate biosynthetic process	Biological Process	1	A0A140VJE0
7	GO:0045047	protein targeting to ER	Biological Process	12	Q9Y3U8, S4R456, C9K025, M0R0F0, Q71UM5, P62081, P62861, P63173, P50914, A0A087WXM6, P39023, D3YTB1
7	GO:0042325	regulation of phosphorylation	Biological Process	8	Q8N4P8, B4E1V0, B3KMT5, B7Z8R6, Q9ULW0, B3KRB7, Q99988, B2RA70
7	GO:0045944	positive regulation of transcription from RNA polymerase II promoter	Biological Process	6	A0A1B0GVI7, Q9BVP2, B3KMT5, Q9Y6H1, B3KRB7, F1JVV5
7	GO:0006699	bile acid biosynthetic process	Biological Process	1	B4DE67
7	GO:0032780	negative regulation of ATPase activity	Biological Process	1	B4E1V0
8	GO:0010951	negative regulation of endopeptidase activity	Biological Process	2	A8MW49, B2RA70
8	GO:0000398	mRNA splicing, via spliceosome	Biological Process	2	Q12872, I3L1D4
8	GO:0051261	protein depolymerization	Biological Process	1	Q5T123
8	GO:0042796	snRNA transcription from RNA polymerase III promoter	Biological Process	1	Q53RD8
8	GO:0018108	peptidyl-tyrosine phosphorylation	Biological Process	1	B2RA70
8	GO:0070198	protein localization to chromosome, telomeric region	Biological Process	1	Q9BVP2
8	GO:0000041	transition metal ion transport	Biological Process	3	B4E1V0, H7C5E8, G3V1D1
8	GO:0009179	purine ribonucleoside diphosphate metabolic process	Biological Process	1	B3KMT5
8	GO:0000956	nuclear-transcribed mRNA catabolic process	Biological Process	12	Q9Y3U8, S4R456, C9K025, M0R0F0, Q71UM5, P62081, P62861, P63173, P50914, A0A087WXM6, P39023, D3YTB1
8	GO:0019373	epoxygenase P450 pathway	Biological Process	1	Q16678
8	GO:0006090	pyruvate metabolic process	Biological Process	1	B3KMT5
8	GO:2000058	regulation of protein ubiquitination involved in ubiquitin-dependent protein catabolic process	Biological Process	1	B2R4U3
8	GO:0050731	positive regulation of peptidyl-tyrosine phosphorylation	Biological Process	1	B2RA70
8	GO:0033233	regulation of protein sumoylation	Biological Process	1	Q9BVP2
8	GO:0018105	peptidyl-serine phosphorylation	Biological Process	1	B3KRB7
8	GO:0061614	pri-miRNA transcription from RNA polymerase II promoter	Biological Process	1	Q9BVP2
8	GO:1902893	regulation of pri-miRNA transcription from RNA polymerase II promoter	Biological Process	1	Q9BVP2
8	GO:0006473	protein acetylation	Biological Process	1	Q5JXX1
8	GO:0038127	ERBB signaling pathway	Biological Process	1	B2RA70
8	GO:0018209	peptidyl-serine modification	Biological Process	1	B3KRB7
8	GO:0016573	histone acetylation	Biological Process	1	Q5JXX1
8	GO:0030212	hyaluronan metabolic process	Biological Process	1	Q5T985
8	GO:0007004	telomere maintenance via telomerase	Biological Process	1	B2RA70
8	GO:0033490	cholesterol biosynthetic process via lathosterol	Biological Process	1	Q15125
8	GO:0071168	protein localization to chromatin	Biological Process	1	P16402
8	GO:0006361	transcription initiation from RNA polymerase I promoter	Biological Process	1	B4DTK6
8	GO:0031396	regulation of protein ubiquitination	Biological Process	3	Q8N4P8, B2R4U3, B4DQK1
8	GO:0018196	peptidyl-asparagine modification	Biological Process	1	P60604
8	GO:0032515	negative regulation of phosphoprotein phosphatase activity	Biological Process	1	B3KRB7
8	GO:0006614	SRP-dependent cotranslational protein targeting to membrane	Biological Process	12	Q9Y3U8, S4R456, P62861, C9K025, P63173, M0R0F0, P50914, Q71UM5, A0A087WXM6, P39023, D3YTB1, P62081
8	GO:0006919	activation of cysteine-type endopeptidase activity involved in apoptotic process	Biological Process	1	Q71UM5
8	GO:2000060	positive regulation of protein ubiquitination involved in ubiquitin-dependent protein catabolic process	Biological Process	1	B2R4U3
8	GO:0006511	ubiquitin-dependent protein catabolic process	Biological Process	5	P60604, G5E9A6, B2R4U3, Q53EY9, Q7Z6E9
8	GO:0043534	blood vessel endothelial cell migration	Biological Process	1	Q5T123
8	GO:0010950	positive regulation of endopeptidase activity	Biological Process	1	Q71UM5
8	GO:0038095	Fc-epsilon receptor signaling pathway	Biological Process	1	B3KRB7
8	GO:0055065	metal ion homeostasis	Biological Process	4	B4E1V0, B7Z8Q4, H7C5E8, G3V1D1
8	GO:0042795	snRNA transcription from RNA polymerase II promoter	Biological Process	1	Q53RD8
8	GO:0009301	snRNA transcription	Biological Process	1	Q53RD8
8	GO:1902895	positive regulation of pri-miRNA transcription from RNA polymerase II promoter	Biological Process	1	Q9BVP2
8	GO:0033235	positive regulation of protein sumoylation	Biological Process	1	Q9BVP2
8	GO:0046031	ADP metabolic process	Biological Process	1	B3KMT5
8	GO:0097459	iron ion import into cell	Biological Process	1	H7C5E8
8	GO:0034142	toll-like receptor 4 signaling pathway	Biological Process	1	B4E1V0
8	GO:0031397	negative regulation of protein ubiquitination	Biological Process	2	Q8N4P8, B2R4U3
8	GO:0009167	purine ribonucleoside monophosphate metabolic process	Biological Process	2	P09669, B3KMT5
8	GO:0051574	positive regulation of histone H3-K9 methylation	Biological Process	1	P16402
8	GO:0032446	protein modification by small protein conjugation	Biological Process	10	P60604, Q8N4P8, Q9BVP2, B2R4U3, Q8TB52, A8K7A2, B4DQK1, Q53EY9, P11388, Q7Z6E9
8	GO:2000116	regulation of cysteine-type endopeptidase activity	Biological Process	3	A8MW49, Q71UM5, B2RA70
8	GO:0019433	triglyceride catabolic process	Biological Process	1	A8MW49
8	GO:0048013	ephrin receptor signaling pathway	Biological Process	1	B2RA70
8	GO:0050730	regulation of peptidyl-tyrosine phosphorylation	Biological Process	1	B2RA70
8	GO:0070228	regulation of lymphocyte apoptotic process	Biological Process	1	Q53RD8
8	GO:0051570	regulation of histone H3-K9 methylation	Biological Process	1	P16402
8	GO:0070230	positive regulation of lymphocyte apoptotic process	Biological Process	1	Q53RD8
8	GO:0014065	phosphatidylinositol 3-kinase signaling	Biological Process	2	Q96RG4, B2RA70
8	GO:0035507	regulation of myosin-light-chain-phosphatase activity	Biological Process	1	B3KRB7
8	GO:0046777	protein autophosphorylation	Biological Process	1	B2RA70
8	GO:0035338	long-chain fatty-acyl-CoA biosynthetic process	Biological Process	1	O00767
8	GO:0030261	chromosome condensation	Biological Process	2	A8K4B4, P11388
8	GO:0033489	cholesterol biosynthetic process via desmosterol	Biological Process	1	Q15125
8	GO:0045860	positive regulation of protein kinase activity	Biological Process	3	B4E1V0, Q9ULW0, B2RA70
8	GO:1904667	negative regulation of ubiquitin protein ligase activity	Biological Process	1	B2R4U3
8	GO:0015758	glucose transport	Biological Process	1	Q96RG4
8	GO:0018212	peptidyl-tyrosine modification	Biological Process	1	B2RA70
8	GO:0000375	RNA splicing, via transesterification reactions	Biological Process	2	Q12872, I3L1D4
8	GO:0097267	omega-hydroxylase P450 pathway	Biological Process	1	Q16678
8	GO:0070227	lymphocyte apoptotic process	Biological Process	1	Q53RD8
8	GO:0046034	ATP metabolic process	Biological Process	2	P09669, B3KMT5
8	GO:0060389	pathway-restricted SMAD protein phosphorylation	Biological Process	1	Q99988
8	GO:0051567	histone H3-K9 methylation	Biological Process	1	P16402
8	GO:0046129	purine ribonucleoside biosynthetic process	Biological Process	1	A0A140VJE0
8	GO:1904668	positive regulation of ubiquitin protein ligase activity	Biological Process	1	B2R4U3
8	GO:0061647	histone H3-K9 modification	Biological Process	1	P16402
8	GO:0015689	molybdate ion transport	Biological Process	1	Q6N075
8	GO:0031398	positive regulation of protein ubiquitination	Biological Process	1	B2R4U3
8	GO:0031124	mRNA 3'-end processing	Biological Process	1	Q9BWT3
8	GO:0071900	regulation of protein serine/threonine kinase activity	Biological Process	3	Q8N4P8, B4E1V0, B2RA70
8	GO:0038094	Fc-gamma receptor signaling pathway	Biological Process	1	B2RA70
8	GO:0046329	negative regulation of JNK cascade	Biological Process	1	B7Z8R6
8	GO:0042501	serine phosphorylation of STAT protein	Biological Process	1	B3KRB7
8	GO:0015718	monocarboxylic acid transport	Biological Process	2	Q96RG4, F6KPG5
8	GO:0018205	peptidyl-lysine modification	Biological Process	5	Q9BVP2, A8K7A2, Q5JXX1, P11388, P16402
8	GO:0070838	divalent metal ion transport	Biological Process	1	H7C5E8
8	GO:0006875	cellular metal ion homeostasis	Biological Process	4	B4E1V0, B7Z8Q4, H7C5E8, G3V1D1
8	GO:0002756	MyD88-independent toll-like receptor signaling pathway	Biological Process	1	B3KRB7
8	GO:0001523	retinoid metabolic process	Biological Process	2	Q16678, O75487
8	GO:0009205	purine ribonucleoside triphosphate metabolic process	Biological Process	2	P09669, B3KMT5
8	GO:0015682	ferric iron transport	Biological Process	1	H7C5E8
8	GO:0031145	anaphase-promoting complex-dependent catabolic process	Biological Process	1	B2R4U3
9	GO:0035666	TRIF-dependent toll-like receptor signaling pathway	Biological Process	1	B3KRB7
9	GO:0016567	protein ubiquitination	Biological Process	7	P60604, Q8N4P8, B2R4U3, Q8TB52, B4DQK1, Q53EY9, Q7Z6E9
9	GO:0000377	RNA splicing, via transesterification reactions with bulged adenosine as nucleophile	Biological Process	2	Q12872, I3L1D4
9	GO:0016925	protein sumoylation	Biological Process	3	Q9BVP2, A8K7A2, P11388
9	GO:0018394	peptidyl-lysine acetylation	Biological Process	1	Q5JXX1
9	GO:0015684	ferrous iron transport	Biological Process	1	H7C5E8
9	GO:2000117	negative regulation of cysteine-type endopeptidase activity	Biological Process	2	A8MW49, B2RA70
9	GO:0070234	positive regulation of T cell apoptotic process	Biological Process	1	Q53RD8
9	GO:0032147	activation of protein kinase activity	Biological Process	1	Q9ULW0
9	GO:0046916	cellular transition metal ion homeostasis	Biological Process	4	B4E1V0, B7Z8Q4, H7C5E8, G3V1D1
9	GO:0000184	nuclear-transcribed mRNA catabolic process, nonsense-mediated decay	Biological Process	12	Q9Y3U8, S4R456, P62861, C9K025, P63173, M0R0F0, P50914, Q71UM5, A0A087WXM6, P39023, D3YTB1, P62081
9	GO:0042787	protein ubiquitination involved in ubiquitin-dependent protein catabolic process	Biological Process	2	B2R4U3, Q7Z6E9
9	GO:0006475	internal protein amino acid acetylation	Biological Process	1	Q5JXX1
9	GO:0055076	transition metal ion homeostasis	Biological Process	4	B4E1V0, B7Z8Q4, H7C5E8, G3V1D1
9	GO:0006826	iron ion transport	Biological Process	3	B4E1V0, H7C5E8, G3V1D1
9	GO:0097460	ferrous iron import into cell	Biological Process	1	H7C5E8
9	GO:0046323	glucose import	Biological Process	1	Q96RG4
9	GO:0070231	T cell apoptotic process	Biological Process	1	Q53RD8
9	GO:0070232	regulation of T cell apoptotic process	Biological Process	1	Q53RD8
9	GO:2001056	positive regulation of cysteine-type endopeptidase activity	Biological Process	1	Q71UM5
9	GO:0035509	negative regulation of myosin-light-chain-phosphatase activity	Biological Process	1	B3KRB7
9	GO:0071902	positive regulation of protein serine/threonine kinase activity	Biological Process	2	B4E1V0, B2RA70
10	GO:0018393	internal peptidyl-lysine acetylation	Biological Process	1	Q5JXX1
10	GO:0070243	regulation of thymocyte apoptotic process	Biological Process	1	Q53RD8
10	GO:0070242	thymocyte apoptotic process	Biological Process	1	Q53RD8
10	GO:0070627	ferrous iron import	Biological Process	1	H7C5E8
10	GO:0055072	iron ion homeostasis	Biological Process	4	B4E1V0, B7Z8Q4, H7C5E8, G3V1D1
10	GO:0097286	iron ion import	Biological Process	1	H7C5E8
10	GO:0070245	positive regulation of thymocyte apoptotic process	Biological Process	1	Q53RD8
10	GO:0000209	protein polyubiquitination	Biological Process	3	P60604, B2R4U3, Q7Z6E9
10	GO:0006879	cellular iron ion homeostasis	Biological Process	4	B4E1V0, B7Z8Q4, H7C5E8, G3V1D1
11	GO:0070936	protein K48-linked ubiquitination	Biological Process	2	P60604, B2R4U3
11	GO:0070979	protein K11-linked ubiquitination	Biological Process	1	B2R4U3
11	GO:0033212	iron assimilation	Biological Process	1	B4E1V0
12	GO:0033214	iron assimilation by chelation and transport	Biological Process	1	B4E1V0

## Sheet: MF
GO function annotation and analysis different expressed proteins of ACBP-OXA vs. control MF
Level	GO_ID	Term	Type	Seqs_Num	Sequences
1	GO:0003674	molecular_function	Molecular Function	123	C9K025, Q6DKI1, Q9BW34, Q9BWT3, B3KNS8, B3KXW2, P62081, G3V1D1, Q53RD8, H0YNP9, Q5HYD9, Q8TDD1, A0A0A0MRW6, A0A087WXM6, O60287, Q9NSI2, B4DMI9, Q9ULW0, B3KRB7, I3L1D4, P07477, A0A0S2Z5K6, Q9P1Y5, Q5T123, Q9Y6H1, F6KPG5, B4DND9, P0CJ79, H3BQH3, P63173, P63218, P46013, B3KRC6, H3BMQ2, Q15397, Q13895, Q8NEF9, G5E9A6, Q9BVP2, O75487, E9PM82, P11388, Q96HP0, O60701, Q9Y3C1, B4DQK1, B1ALI9, F1JVV5, Q99…
2	GO:0045182	translation regulator activity	Molecular Function	1	Q71UM5
2	GO:0000988	transcription factor activity, protein binding	Molecular Function	2	Q8TDD1, B3KMT5
2	GO:0005215	transporter activity	Molecular Function	6	Q6N075, P09669, A8MW49, B7Z8Q4, D6RBJ7, Q15125
2	GO:0098772	molecular function regulator	Molecular Function	10	B4DUP5, B4E1V0, Q96RG4, Q71UM5, Q8IZZ8, B7Z8R6, Q5T123, Q5T985, P01023, Q96HP0
2	GO:0004871	signal transducer activity	Molecular Function	7	O15173, A0A1B0GVI7, Q96RG4, Q9BW34, P63218, Q15125, B3KRB7
2	GO:0001071	nucleic acid binding transcription factor activity	Molecular Function	3	A0A1B0GVI7, Q53RD8, F1JVV5
2	GO:0009055	electron carrier activity	Molecular Function	3	O60701, P09669, B7Z2S5
2	GO:0005488	binding	Molecular Function	118	C9K025, Q9BW34, Q6DKI1, Q9BWT3, B3KXW2, B3KNS8, P62081, G3V1D1, Q53RD8, H0YNP9, Q5HYD9, Q8TDD1, A0A0A0MRW6, A0A087WXM6, O60287, Q9NSI2, B4DMI9, Q9ULW0, B3KRB7, I3L1D4, P07477, A0A0S2Z5K6, Q9P1Y5, Q5T123, Q9Y6H1, F6KPG5, B4DND9, P0CJ79, H3BQH3, P63173, P63218, P46013, B3KRC6, H3BMQ2, Q15397, Q13895, Q8NEF9, G5E9A6, Q9BVP2, O75487, E9PM82, P11388, Q96HP0, O60701, Q9Y3C1, B4DQK1, B1ALI9, F1JVV5, Q99…
2	GO:0005198	structural molecule activity	Molecular Function	14	Q9Y3U8, S4R456, C9K025, M0R0F0, Q71UM5, P62081, B3KS36, P62861, P63173, P50914, A0A087WXM6, P39023, D3YTB1, Q6FHK1
2	GO:0003824	catalytic activity	Molecular Function	40	O00767, P09669, Q9ULR3, G5E9A6, Q96RG4, B4E1V0, Q9BVP2, Q9BWT3, P31350, H0YNP9, Q53EY9, P11388, Q5HYD9, Q8TDD1, O60701, B2R4U3, H7C5E8, B4DMI9, B4DQK1, A0A140VJE0, Q15125, P07477, B3KRB7, P48506, Q92876, B7Z2S5, Q7Z6E9, P60604, B3KM35, Q8N4P8, Q13823, Q16678, Q8TB52, Q4G148, B4DE67, Q8IY37, Q9NY93, B3KRC6, A0A024R172, B2RA70
2	GO:0016209	antioxidant activity	Molecular Function	2	A8MW49, B7Z2S5
2	GO:0060089	molecular transducer activity	Molecular Function	3	O15173, A0A1B0GVI7, Q15125
3	GO:0036094	small molecule binding	Molecular Function	17	Q8N4P8, Q9BVP2, Q13823, D6RBJ7, A0A024RDF4, Q8IY37, Q9NY93, P11388, Q8TDD1, O60701, K7ER90, Q6IAM0, Q9ULW0, I3L1D4, P48506, B2RA70, B7Z2S5
3	GO:0097367	carbohydrate derivative binding	Molecular Function	13	Q8N4P8, B4E1V0, Q9BVP2, Q13823, Q8IZZ8, O75487, Q8IY37, Q9NY93, P11388, Q8TDD1, Q9ULW0, P48506, B2RA70
3	GO:0051183	vitamin transporter activity	Molecular Function	1	D6RBJ7
3	GO:1901363	heterocyclic compound binding	Molecular Function	69	Q9Y3U8, O95478, C9K025, Q9BW34, Q71UM5, Q6DKI1, Q9BWT3, A8K800, B3KXW2, B3KNS8, P62081, Q53RD8, Q5HYD9, Q8TDD1, B4DTK6, B2R823, A0A1B0GVI7, A0A0A0MRW6, A0A087WXM6, P39023, O60287, A0A140VJE0, Q9ULW0, I3L1D4, S4R456, Q12872, Q16678, A0A024RDF4, B7Z8R6, Q5T440, Q9Y6H1, F6KPG5, Q9NY93, B4DND9, P0CJ79, P63173, P46013, B3KRC6, Q15397, Q13895, Q8NEF9, Q9BVP2, E9PM82, P11388, Q9H9Y2, O60701, P50914, Q9Y…
3	GO:0004129	cytochrome-c oxidase activity	Molecular Function	1	P09669
3	GO:0030234	enzyme regulator activity	Molecular Function	7	B4E1V0, Q71UM5, Q8IZZ8, B7Z8R6, Q5T123, Q5T985, P01023
3	GO:0051184	cofactor transporter activity	Molecular Function	1	B7Z8Q4
3	GO:0043167	ion binding	Molecular Function	18	O00767, B4E1V0, Q16678, Q8TB52, Q9BWT3, B3KXW2, G3V1D1, B4DMX4, F6KPG5, Q53RD8, P11388, P0CJ79, H7C5E8, B3KRC6, P07477, P48506, A0A024R172, Q7Z6E9
3	GO:0015643	toxic substance binding	Molecular Function	1	F6KPG5
3	GO:0090079	translation regulator activity, nucleic acid binding	Molecular Function	1	Q71UM5
3	GO:0022892	substrate-specific transporter activity	Molecular Function	2	Q6N075, P09669
3	GO:0044877	macromolecular complex binding	Molecular Function	5	Q96RG4, B7Z8R6, P11388, B2RA70, P16402
3	GO:0016740	transferase activity	Molecular Function	12	P60604, B3KM35, Q96RG4, Q8TB52, Q4G148, Q9BWT3, Q53EY9, B2R4U3, A0A140VJE0, B3KRB7, B2RA70, Q7Z6E9
3	GO:0000989	transcription factor activity, transcription factor binding	Molecular Function	2	Q8TDD1, B3KMT5
[truncated: 312 more rows]

## Sheet: CC
GO function annotation and analysis different expressed proteins of ACBP-OXA vs. control CC
[truncated: 261 more rows]

[truncated: 1 more sheets: Enrichment]
